# Supplementary material
Source: HighWire-hosted journal article supplement (https://gut.bmj.com/highwire/filestream/192786/field_highwire_adjunct_files/2/58121612webonlydata3.xls)
Supplement: 58121612webonlydata3.xls [file 58121612webonlydata3.xls]

## Sheet: Blad2
Bio Functional Analysis in UC cohort A	Category	Function	Function Annotation	B-H P-value	Molecules	# Molecules		Bio Functional Analysis in UC cohort B	Category	Function	Function Annotation	B-H P-value	Molecules	# Molecules		Bio Functional Analysis in both UC cohorts combined (cohort A and cohort B)	Category	Function	Function Annotation	B-H P-value	Molecules	# Molecules
	Cellular Movement	migration	migration of cells	1.74e-18	CAV1, CCL2, CCL4, CCL8, CD69, CD86, CSF2RB, CXCL5, CXCL6, CXCR7, EDNRB, FCER1G, FCGR2A, FYB, HGF, IGFBP5, IL6, IL11, INHBA, LOX, MME, MMP3, MMP10, PDE4B, PLAT, PLAU, PSCDBP, PTGS2, RGS18, ROBO1, RUNX2, S100A9, SDC2, SELE, SERPINE1, SOCS3, ST8SIA4, STC1, TFPI, TNC, VCAN, WNT5A, ZEB2	43			Inflammatory Disease	inflammatory disorder	inflammatory disorder	4.33e-46	ALOX5AP, ANPEP, AQP9, BCL6, C5AR1, CCL4, CCR1, CD14, CDX2, CHI3L1, CLEC4A, CLEC4E, CR1, CSF3, CSF2RB, CSF3R, CXCL5, CXCL6, CXCL14, CYP4F3, DUSP1, EGR1, EREG, FCER1G, FCGR1A, FCGR2A, FCN1, FGF2, FGR, FPR1, FPR2, FRZB, G0S2, GADD45B, GCA, GNLY, HCK, HGF, HLA-DQA1, HLA-DQB1, HLA-DRB4, HSD11B1, ICAM1, IL6, IL8, IL33, IL13RA2, IL1A, IL1B, IL1RN, IL7R, IL8RA, IL8RB, ITGAM, ITGAX, KCNJ15, LCP2, LILRA6, …	93			Connective Tissue Disorders	arthritis	arthritis	3.9e-36	AQP9, BCL6, C5AR1, CCL4, CCL8, CCR1, CD69, CLEC4E, CSF3, CSF3R, CXCL5, CXCL6, CXCL10, CXCL14, FCGR2A, FCN1, FGF2, FPR2, G0S2, GNLY, IL6, IL8, IL1A, IL1B, IL1RN, IL7R, IL8RB, KCNJ15, LRRK2, MME, MMP3, MMP10, MMP1 (includes EG:4312), NAMPT, OSM, PDE4B, PTGS2, PTPRC, S100A8, S100A9, S100A12, SOCS3, SOD2, SPP1, TAGAP, TFPI2, THBS2, TLR1, TLR2, TNFAIP6, TNFRSF10C	51
	Cellular Movement	movement	movement of cells	1.74e-18	CAV1, CCL2, CCL4, CCL8, CD69, CD86, CSF2RB, CXCL5, CXCL6, CXCR7, EDNRB, FCER1G, FCGR2A, FYB, HGF, IGFBP5, IL6, IL11, INHBA, LOX, MME, MMP3, MMP10, PDE4B, PLAT, PLAU, PSCDBP, PTGS2, RGS18, ROBO1, RUNX2, S100A9, SDC2, SELE, SERPINE1, SOCS3, ST8SIA4, STC1, TFPI, TNC, VCAN, WNT5A, ZEB2	43			Inflammatory Disease	arthritis	arthritis	1.01e-45	ALOX5AP, AQP9, BCL6, C5AR1, CCL4, CCR1, CLEC4A, CLEC4E, CR1, CSF3, CSF2RB, CSF3R, CXCL5, CXCL6, CXCL14, CYP4F3, DUSP1, FCER1G, FCGR1A, FCGR2A, FCN1, FGF2, FPR2, FRZB, G0S2, GADD45B, GCA, GNLY, HCK, HLA-DQA1, HLA-DRB4, ICAM1, IL6, IL8, IL1A, IL1B, IL1RN, IL7R, IL8RA, IL8RB, KCNJ15, LRRK2, MME, MMP3, MMP1 (includes EG:4312), NAMPT, NCF4, OSM, P2RY13, PDE4B, PTGS2, PTPRC, S100A8, S100A9, S100A12, SO…	70			Connective Tissue Disorders	inflammatory arthropathy	inflammatory arthropathy	3.9e-36	AQP9, BCL6, C5AR1, CCL4, CCL8, CCR1, CD69, CLEC4E, CSF3, CSF3R, CXCL5, CXCL6, CXCL10, CXCL14, FCGR2A, FCN1, FGF2, FPR2, G0S2, GNLY, IL6, IL8, IL1A, IL1B, IL1RN, IL7R, IL8RB, KCNJ15, LRRK2, MME, MMP3, MMP10, MMP1 (includes EG:4312), NAMPT, OSM, PDE4B, PTGS2, PTPRC, S100A8, S100A9, S100A12, SOCS3, SOD2, SPP1, TAGAP, TFPI2, THBS2, TLR1, TLR2, TNFAIP6, TNFRSF10C	51
	Cellular Movement	migration	migration of eukaryotic cells	2.4e-18	CAV1, CCL2, CCL4, CCL8, CD69, CD86, CSF2RB, CXCL5, CXCL6, CXCR7, EDNRB, FCER1G, FCGR2A, FYB, HGF, IGFBP5, IL6, IL11, INHBA, LOX, MME, MMP3, MMP10, PDE4B, PLAT, PLAU, PSCDBP, PTGS2, ROBO1, S100A9, SDC2, SELE, SERPINE1, SOCS3, ST8SIA4, STC1, TFPI, TNC, VCAN, WNT5A, ZEB2	41			Inflammatory Disease	inflammatory arthropathy	inflammatory arthropathy	1.01e-45	ALOX5AP, AQP9, BCL6, C5AR1, CCL4, CCR1, CLEC4A, CLEC4E, CR1, CSF3, CSF2RB, CSF3R, CXCL5, CXCL6, CXCL14, CYP4F3, DUSP1, FCER1G, FCGR1A, FCGR2A, FCN1, FGF2, FPR2, FRZB, G0S2, GADD45B, GCA, GNLY, HCK, HLA-DQA1, HLA-DRB4, ICAM1, IL6, IL8, IL1A, IL1B, IL1RN, IL7R, IL8RA, IL8RB, KCNJ15, LRRK2, MME, MMP3, MMP1 (includes EG:4312), NAMPT, NCF4, OSM, P2RY13, PDE4B, PTGS2, PTPRC, S100A8, S100A9, S100A12, SO…	70			Inflammatory Disease	arthritis	arthritis	3.9e-36	AQP9, BCL6, C5AR1, CCL4, CCL8, CCR1, CD69, CLEC4E, CSF3, CSF3R, CXCL5, CXCL6, CXCL10, CXCL14, FCGR2A, FCN1, FGF2, FPR2, G0S2, GNLY, IL6, IL8, IL1A, IL1B, IL1RN, IL7R, IL8RB, KCNJ15, LRRK2, MME, MMP3, MMP10, MMP1 (includes EG:4312), NAMPT, OSM, PDE4B, PTGS2, PTPRC, S100A8, S100A9, S100A12, SOCS3, SOD2, SPP1, TAGAP, TFPI2, THBS2, TLR1, TLR2, TNFAIP6, TNFRSF10C	51
	Cellular Movement	movement	movement of eukaryotic cells	3.05e-18	CAV1, CCL2, CCL4, CCL8, CD69, CD86, CSF2RB, CXCL5, CXCL6, CXCR7, EDNRB, FCER1G, FCGR2A, FYB, HGF, IGFBP5, IL6, IL11, INHBA, LOX, MME, MMP3, MMP10, PDE4B, PLAT, PLAU, PSCDBP, PTGS2, ROBO1, S100A9, SDC2, SELE, SERPINE1, SOCS3, ST8SIA4, STC1, TFPI, TNC, VCAN, WNT5A, ZEB2	41			Connective Tissue Disorders	arthritis	arthritis	1.01e-45	ALOX5AP, AQP9, BCL6, C5AR1, CCL4, CCR1, CLEC4A, CLEC4E, CR1, CSF3, CSF2RB, CSF3R, CXCL5, CXCL6, CXCL14, CYP4F3, DUSP1, FCER1G, FCGR1A, FCGR2A, FCN1, FGF2, FPR2, FRZB, G0S2, GADD45B, GCA, GNLY, HCK, HLA-DQA1, HLA-DRB4, ICAM1, IL6, IL8, IL1A, IL1B, IL1RN, IL7R, IL8RA, IL8RB, KCNJ15, LRRK2, MME, MMP3, MMP1 (includes EG:4312), NAMPT, NCF4, OSM, P2RY13, PDE4B, PTGS2, PTPRC, S100A8, S100A9, S100A12, SO…	70			Inflammatory Disease	inflammatory arthropathy	inflammatory arthropathy	3.9e-36	AQP9, BCL6, C5AR1, CCL4, CCL8, CCR1, CD69, CLEC4E, CSF3, CSF3R, CXCL5, CXCL6, CXCL10, CXCL14, FCGR2A, FCN1, FGF2, FPR2, G0S2, GNLY, IL6, IL8, IL1A, IL1B, IL1RN, IL7R, IL8RB, KCNJ15, LRRK2, MME, MMP3, MMP10, MMP1 (includes EG:4312), NAMPT, OSM, PDE4B, PTGS2, PTPRC, S100A8, S100A9, S100A12, SOCS3, SOD2, SPP1, TAGAP, TFPI2, THBS2, TLR1, TLR2, TNFAIP6, TNFRSF10C	51
	Cellular Growth and Proliferation	proliferation	proliferation of cells	6.55e-17	BCAT1, CAV1, CAV2, CCL2, CCL4, CD86, COL8A1, CSF2RB, CXCL5, CXCR7, EDNRB, EMP3, ENTPD1, FLI1, FST, FYB, GNG2, HGF, IGFBP5, IL6, IL11, IL13RA2, IL7R, INHBA, LAMP3, LCP2, LILRB1, LOX, LY96, MMP3, NR3C1, PAPPA, PDPN, PLAT, PLAU, PTGS1, PTGS2, RUNX2, S100A9, SDC2, SERPINE1, SLAMF7, SOCS3, STC1, TFPI, TFPI2, THBD, TNC, TNFRSF11B, VCAN, VIM, WIPF1, WNT5A, ZEB1, ZEB2	55			Connective Tissue Disorders	inflammatory arthropathy	inflammatory arthropathy	1.01e-45	ALOX5AP, AQP9, BCL6, C5AR1, CCL4, CCR1, CLEC4A, CLEC4E, CR1, CSF3, CSF2RB, CSF3R, CXCL5, CXCL6, CXCL14, CYP4F3, DUSP1, FCER1G, FCGR1A, FCGR2A, FCN1, FGF2, FPR2, FRZB, G0S2, GADD45B, GCA, GNLY, HCK, HLA-DQA1, HLA-DRB4, ICAM1, IL6, IL8, IL1A, IL1B, IL1RN, IL7R, IL8RA, IL8RB, KCNJ15, LRRK2, MME, MMP3, MMP1 (includes EG:4312), NAMPT, NCF4, OSM, P2RY13, PDE4B, PTGS2, PTPRC, S100A8, S100A9, S100A12, SO…	70			Skeletal and Muscular Disorders	arthritis	arthritis	3.9e-36	AQP9, BCL6, C5AR1, CCL4, CCL8, CCR1, CD69, CLEC4E, CSF3, CSF3R, CXCL5, CXCL6, CXCL10, CXCL14, FCGR2A, FCN1, FGF2, FPR2, G0S2, GNLY, IL6, IL8, IL1A, IL1B, IL1RN, IL7R, IL8RB, KCNJ15, LRRK2, MME, MMP3, MMP10, MMP1 (includes EG:4312), NAMPT, OSM, PDE4B, PTGS2, PTPRC, S100A8, S100A9, S100A12, SOCS3, SOD2, SPP1, TAGAP, TFPI2, THBS2, TLR1, TLR2, TNFAIP6, TNFRSF10C	51
	Connective Tissue Disorders	rheumatic disease	rheumatic disease	6.55e-17	CALD1, CCL2, CCL4, CCL8, CD69, CD86, CLEC4A, CSF2RB, CXCL5, CXCL6, EDNRB, FCER1G, FCGR2A, IGHD, IL6, IL7R, MIRN155 (includes EG:114614), MME, MMP3, MMP10, NR3C1, PDE4B, PLAT, PLAU, PTGS1, PTGS2, S100A9, SOCS3, TAGAP, TFPI2, TLR1, VIM	32			Skeletal and Muscular Disorders	arthritis	arthritis	1.01e-45	ALOX5AP, AQP9, BCL6, C5AR1, CCL4, CCR1, CLEC4A, CLEC4E, CR1, CSF3, CSF2RB, CSF3R, CXCL5, CXCL6, CXCL14, CYP4F3, DUSP1, FCER1G, FCGR1A, FCGR2A, FCN1, FGF2, FPR2, FRZB, G0S2, GADD45B, GCA, GNLY, HCK, HLA-DQA1, HLA-DRB4, ICAM1, IL6, IL8, IL1A, IL1B, IL1RN, IL7R, IL8RA, IL8RB, KCNJ15, LRRK2, MME, MMP3, MMP1 (includes EG:4312), NAMPT, NCF4, OSM, P2RY13, PDE4B, PTGS2, PTPRC, S100A8, S100A9, S100A12, SO…	70			Skeletal and Muscular Disorders	inflammatory arthropathy	inflammatory arthropathy	3.9e-36	AQP9, BCL6, C5AR1, CCL4, CCL8, CCR1, CD69, CLEC4E, CSF3, CSF3R, CXCL5, CXCL6, CXCL10, CXCL14, FCGR2A, FCN1, FGF2, FPR2, G0S2, GNLY, IL6, IL8, IL1A, IL1B, IL1RN, IL7R, IL8RB, KCNJ15, LRRK2, MME, MMP3, MMP10, MMP1 (includes EG:4312), NAMPT, OSM, PDE4B, PTGS2, PTPRC, S100A8, S100A9, S100A12, SOCS3, SOD2, SPP1, TAGAP, TFPI2, THBS2, TLR1, TLR2, TNFAIP6, TNFRSF10C	51
	Inflammatory Disease	rheumatic disease	rheumatic disease	6.55e-17	CALD1, CCL2, CCL4, CCL8, CD69, CD86, CLEC4A, CSF2RB, CXCL5, CXCL6, EDNRB, FCER1G, FCGR2A, IGHD, IL6, IL7R, MIRN155 (includes EG:114614), MME, MMP3, MMP10, NR3C1, PDE4B, PLAT, PLAU, PTGS1, PTGS2, S100A9, SOCS3, TAGAP, TFPI2, TLR1, VIM	32			Skeletal and Muscular Disorders	inflammatory arthropathy	inflammatory arthropathy	1.01e-45	ALOX5AP, AQP9, BCL6, C5AR1, CCL4, CCR1, CLEC4A, CLEC4E, CR1, CSF3, CSF2RB, CSF3R, CXCL5, CXCL6, CXCL14, CYP4F3, DUSP1, FCER1G, FCGR1A, FCGR2A, FCN1, FGF2, FPR2, FRZB, G0S2, GADD45B, GCA, GNLY, HCK, HLA-DQA1, HLA-DRB4, ICAM1, IL6, IL8, IL1A, IL1B, IL1RN, IL7R, IL8RA, IL8RB, KCNJ15, LRRK2, MME, MMP3, MMP1 (includes EG:4312), NAMPT, NCF4, OSM, P2RY13, PDE4B, PTGS2, PTPRC, S100A8, S100A9, S100A12, SO…	70			Connective Tissue Disorders	rheumatic disease	rheumatic disease	8.49e-35	AQP9, BCL6, C5AR1, CCL4, CCL8, CCR1, CD69, CLEC4E, CSF3, CSF3R, CXCL5, CXCL6, CXCL10, CXCL14, FCGR2A, FCN1, FGF2, FPR2, G0S2, GNLY, IL6, IL8, IL1A, IL1B, IL1RN, IL7R, IL8RB, KCNJ15, LRRK2, MME, MMP3, MMP10, MMP1 (includes EG:4312), NAMPT, OSM, PDE4B, PTGS2, PTPRC, S100A8, S100A9, S100A12, SOCS3, SOD2, SPP1, TAGAP, TFPI2, THBS2, TLR1, TLR2, TNFAIP6, TNFRSF10C	51
	Skeletal and Muscular Disorders	rheumatic disease	rheumatic disease	6.55e-17	CALD1, CCL2, CCL4, CCL8, CD69, CD86, CLEC4A, CSF2RB, CXCL5, CXCL6, EDNRB, FCER1G, FCGR2A, IGHD, IL6, IL7R, MIRN155 (includes EG:114614), MME, MMP3, MMP10, NR3C1, PDE4B, PLAT, PLAU, PTGS1, PTGS2, S100A9, SOCS3, TAGAP, TFPI2, TLR1, VIM	32			Inflammatory Disease	rheumatic disease	rheumatic disease	6.63e-45	ALOX5AP, AQP9, BCL6, C5AR1, CCL4, CCR1, CLEC4A, CLEC4E, CR1, CSF3, CSF2RB, CSF3R, CXCL5, CXCL6, CXCL14, CYP4F3, DUSP1, FCER1G, FCGR1A, FCGR2A, FCN1, FGF2, FPR2, FRZB, G0S2, GADD45B, GCA, GNLY, HCK, HLA-DQA1, HLA-DRB4, ICAM1, IL6, IL8, IL1A, IL1B, IL1RN, IL7R, IL8RA, IL8RB, KCNJ15, LRRK2, MME, MMP3, MMP1 (includes EG:4312), NAMPT, NCF4, OSM, P2RY13, PDE4B, PTGS2, PTPRC, S100A8, S100A9, S100A12, SE…	71			Inflammatory Disease	rheumatic disease	rheumatic disease	8.49e-35	AQP9, BCL6, C5AR1, CCL4, CCL8, CCR1, CD69, CLEC4E, CSF3, CSF3R, CXCL5, CXCL6, CXCL10, CXCL14, FCGR2A, FCN1, FGF2, FPR2, G0S2, GNLY, IL6, IL8, IL1A, IL1B, IL1RN, IL7R, IL8RB, KCNJ15, LRRK2, MME, MMP3, MMP10, MMP1 (includes EG:4312), NAMPT, OSM, PDE4B, PTGS2, PTPRC, S100A8, S100A9, S100A12, SOCS3, SOD2, SPP1, TAGAP, TFPI2, THBS2, TLR1, TLR2, TNFAIP6, TNFRSF10C	51
	Inflammatory Disease	inflammatory disorder	inflammatory disorder	2.53e-16	ABCA1, CALD1, CCL2, CCL4, CCL8, CD69, CD86, CLEC4A, CSF2RB, CXCL5, CXCL6, EDNRB, FCER1G, FCGR2A, HGF, IGHD, IL6, IL13RA2, IL7R, LCP2, MIRN155 (includes EG:114614), MME, MMP3, MMP10, NR3C1, PDE4B, PLAT, PLAU, PTGS1, PTGS2, S100A9, SELE, SOCS3, TAGAP, TBC1D9, TFPI2, THBD, TLR1, TNFRSF11B, VIM, ZEB1	41			Connective Tissue Disorders	rheumatic disease	rheumatic disease	6.63e-45	ALOX5AP, AQP9, BCL6, C5AR1, CCL4, CCR1, CLEC4A, CLEC4E, CR1, CSF3, CSF2RB, CSF3R, CXCL5, CXCL6, CXCL14, CYP4F3, DUSP1, FCER1G, FCGR1A, FCGR2A, FCN1, FGF2, FPR2, FRZB, G0S2, GADD45B, GCA, GNLY, HCK, HLA-DQA1, HLA-DRB4, ICAM1, IL6, IL8, IL1A, IL1B, IL1RN, IL7R, IL8RA, IL8RB, KCNJ15, LRRK2, MME, MMP3, MMP1 (includes EG:4312), NAMPT, NCF4, OSM, P2RY13, PDE4B, PTGS2, PTPRC, S100A8, S100A9, S100A12, SE…	71			Skeletal and Muscular Disorders	rheumatic disease	rheumatic disease	8.49e-35	AQP9, BCL6, C5AR1, CCL4, CCL8, CCR1, CD69, CLEC4E, CSF3, CSF3R, CXCL5, CXCL6, CXCL10, CXCL14, FCGR2A, FCN1, FGF2, FPR2, G0S2, GNLY, IL6, IL8, IL1A, IL1B, IL1RN, IL7R, IL8RB, KCNJ15, LRRK2, MME, MMP3, MMP10, MMP1 (includes EG:4312), NAMPT, OSM, PDE4B, PTGS2, PTPRC, S100A8, S100A9, S100A12, SOCS3, SOD2, SPP1, TAGAP, TFPI2, THBS2, TLR1, TLR2, TNFAIP6, TNFRSF10C	51
	Connective Tissue Disorders	arthritis	arthritis	5.81e-16	CALD1, CCL2, CCL4, CCL8, CD69, CD86, CLEC4A, CSF2RB, CXCL5, CXCL6, FCER1G, FCGR2A, IGHD, IL6, IL7R, MME, MMP3, MMP10, NR3C1, PDE4B, PLAT, PLAU, PTGS1, PTGS2, S100A9, SOCS3, TAGAP, TFPI2, TLR1, VIM	30			Skeletal and Muscular Disorders	rheumatic disease	rheumatic disease	6.63e-45	ALOX5AP, AQP9, BCL6, C5AR1, CCL4, CCR1, CLEC4A, CLEC4E, CR1, CSF3, CSF2RB, CSF3R, CXCL5, CXCL6, CXCL14, CYP4F3, DUSP1, FCER1G, FCGR1A, FCGR2A, FCN1, FGF2, FPR2, FRZB, G0S2, GADD45B, GCA, GNLY, HCK, HLA-DQA1, HLA-DRB4, ICAM1, IL6, IL8, IL1A, IL1B, IL1RN, IL7R, IL8RA, IL8RB, KCNJ15, LRRK2, MME, MMP3, MMP1 (includes EG:4312), NAMPT, NCF4, OSM, P2RY13, PDE4B, PTGS2, PTPRC, S100A8, S100A9, S100A12, SE…	71			Inflammatory Disease	inflammatory disorder	inflammatory disorder	2.3e-33	AQP9, BCL6, C5AR1, CCL4, CCL8, CCR1, CD69, CHI3L1, CLEC4E, CSF3, CSF3R, CXCL5, CXCL6, CXCL10, CXCL14, EREG, FCGR2A, FCN1, FGF2, FPR1, FPR2, G0S2, GNLY, HGF, HSD11B1, IL6, IL8, IL33, IL13RA2, IL1A, IL1B, IL1RN, IL7R, IL8RB, KCNJ15, LCP2, LRRK2, MME, MMP3, MMP10, MMP1 (includes EG:4312), NAMPT, OSM, PDE4B, PTGS2, PTPRC, S100A8, S100A9, S100A12, SELE, SOCS3, SOD2, SPP1, TAGAP, TFPI2, THBS2, TLR1, TL…	63
	Connective Tissue Disorders	inflammatory arthropathy	inflammatory arthropathy	5.81e-16	CALD1, CCL2, CCL4, CCL8, CD69, CD86, CLEC4A, CSF2RB, CXCL5, CXCL6, FCER1G, FCGR2A, IGHD, IL6, IL7R, MME, MMP3, MMP10, NR3C1, PDE4B, PLAT, PLAU, PTGS1, PTGS2, S100A9, SOCS3, TAGAP, TFPI2, TLR1, VIM	30			Connective Tissue Disorders	connective tissue disorder	connective tissue disorder	9.98e-43	ALOX5AP, AQP9, BCL6, C5AR1, CCL4, CCR1, CLEC4A, CLEC4E, CR1, CSF3, CSF2RB, CSF3R, CXCL5, CXCL6, CXCL14, CYP4F3, DUSP1, FCER1G, FCGR1A, FCGR2A, FCN1, FGF2, FPR2, FRZB, G0S2, GADD45B, GCA, GNLY, HCK, HLA-DQA1, HLA-DRB4, ICAM1, IL6, IL8, IL1A, IL1B, IL1RN, IL7R, IL8RA, IL8RB, KCNJ15, LRRK2, MME, MMP3, MMP1 (includes EG:4312), NAMPT, NCF4, NR3C2, OSM, P2RY13, PDE4B, PTGS2, PTPRC, S100A8, S100A9, S100…	73			Connective Tissue Disorders	connective tissue disorder	connective tissue disorder	7.74e-32	AQP9, BCL6, C5AR1, CCL4, CCL8, CCR1, CD69, CLEC4E, CSF3, CSF3R, CXCL5, CXCL6, CXCL10, CXCL14, FCGR2A, FCN1, FGF2, FPR2, G0S2, GNLY, IL6, IL8, IL1A, IL1B, IL1RN, IL7R, IL8RB, KCNJ15, LRRK2, MME, MMP3, MMP10, MMP1 (includes EG:4312), NAMPT, OSM, PDE4B, PTGS2, PTPRC, S100A8, S100A9, S100A12, SOCS3, SOD2, SPP1, TAGAP, TFPI2, THBS2, TLR1, TLR2, TNFAIP6, TNFRSF10C	51
	Inflammatory Disease	arthritis	arthritis	5.81e-16	CALD1, CCL2, CCL4, CCL8, CD69, CD86, CLEC4A, CSF2RB, CXCL5, CXCL6, FCER1G, FCGR2A, IGHD, IL6, IL7R, MME, MMP3, MMP10, NR3C1, PDE4B, PLAT, PLAU, PTGS1, PTGS2, S100A9, SOCS3, TAGAP, TFPI2, TLR1, VIM	30			Immunological Disease	autoimmune disease	autoimmune disease	1.45e-42	AQP9, BCL6, CASP4, CCL4, CCR1, CLEC4A, CLEC4E, COL7A1, CR1, CSF3, CSF2RB, CSF3R, CXCL5, CXCL6, CXCL14, CYP4F3, DUSP1, FCGR1A, FCGR2A, FCN1, FGF2, FPR2, FRZB, G0S2, GADD45B, GCA, GNLY, HCK, HLA-DQA1, HLA-DQB1, HLA-DRB4, ICAM1, IL6, IL8, IL1B, IL1RN, IL7R, IL8RA, IL8RB, KCNJ15, LRRK2, MME, MMP3, NAMPT, NCF4, OSM, P2RY13, PDE4B, PTGS2, PTPRC, S100A8, S100A9, S100A12, SELL, SELP, SLC11A1, SOCS3, SPP1…	69			Immunological Disease	autoimmune disease	autoimmune disease	2.48e-31	AQP9, BCL6, CCL4, CCL8, CCR1, CD69, CLEC4E, COL7A1, CSF3, CSF3R, CXCL5, CXCL6, CXCL10, CXCL14, FCGR2A, FCN1, FGF2, FPR2, G0S2, GNLY, IL6, IL8, IL1B, IL1RN, IL7R, IL8RB, KCNJ15, LRRK2, MME, MMP3, NAMPT, OSM, PDE4B, PTGS2, PTPRC, S100A8, S100A9, S100A12, SELL, SLC11A1, SOCS3, SPP1, TAGAP, TLR1, TLR2, TLR8, TNFAIP6, TNFRSF10C	48
	Inflammatory Disease	inflammatory arthropathy	inflammatory arthropathy	5.81e-16	CALD1, CCL2, CCL4, CCL8, CD69, CD86, CLEC4A, CSF2RB, CXCL5, CXCL6, FCER1G, FCGR2A, IGHD, IL6, IL7R, MME, MMP3, MMP10, NR3C1, PDE4B, PLAT, PLAU, PTGS1, PTGS2, S100A9, SOCS3, TAGAP, TFPI2, TLR1, VIM	30			Inflammatory Disease	rheumatoid arthritis	rheumatoid arthritis	1.96e-41	AQP9, BCL6, CCL4, CCR1, CLEC4A, CLEC4E, CR1, CSF2RB, CSF3R, CXCL5, CXCL6, CXCL14, CYP4F3, DUSP1, FCN1, FGF2, FPR2, FRZB, G0S2, GADD45B, GCA, GNLY, HCK, HLA-DQA1, HLA-DRB4, ICAM1, IL6, IL8, IL1B, IL7R, IL8RA, IL8RB, KCNJ15, LRRK2, MME, MMP3, NAMPT, NCF4, OSM, P2RY13, PDE4B, PTGS2, PTPRC, S100A8, S100A9, S100A12, SPP1, TAGAP, TLR1, TLR2, TLR4, TNFAIP3, TNFAIP6, TNFRSF10C, TNFRSF1B, TNFSF13B, ZFP36	57			Connective Tissue Disorders	rheumatoid arthritis	rheumatoid arthritis	1.66e-30	AQP9, BCL6, CCL4, CCL8, CCR1, CD69, CLEC4E, CSF3R, CXCL5, CXCL6, CXCL10, CXCL14, FCN1, FGF2, FPR2, G0S2, GNLY, IL6, IL8, IL1B, IL7R, IL8RB, KCNJ15, LRRK2, MME, MMP3, NAMPT, OSM, PDE4B, PTGS2, PTPRC, S100A8, S100A9, S100A12, SPP1, TAGAP, TLR1, TLR2, TNFAIP6, TNFRSF10C	40
	Skeletal and Muscular Disorders	arthritis	arthritis	5.81e-16	CALD1, CCL2, CCL4, CCL8, CD69, CD86, CLEC4A, CSF2RB, CXCL5, CXCL6, FCER1G, FCGR2A, IGHD, IL6, IL7R, MME, MMP3, MMP10, NR3C1, PDE4B, PLAT, PLAU, PTGS1, PTGS2, S100A9, SOCS3, TAGAP, TFPI2, TLR1, VIM	30			Connective Tissue Disorders	rheumatoid arthritis	rheumatoid arthritis	1.96e-41	AQP9, BCL6, CCL4, CCR1, CLEC4A, CLEC4E, CR1, CSF2RB, CSF3R, CXCL5, CXCL6, CXCL14, CYP4F3, DUSP1, FCN1, FGF2, FPR2, FRZB, G0S2, GADD45B, GCA, GNLY, HCK, HLA-DQA1, HLA-DRB4, ICAM1, IL6, IL8, IL1B, IL7R, IL8RA, IL8RB, KCNJ15, LRRK2, MME, MMP3, NAMPT, NCF4, OSM, P2RY13, PDE4B, PTGS2, PTPRC, S100A8, S100A9, S100A12, SPP1, TAGAP, TLR1, TLR2, TLR4, TNFAIP3, TNFAIP6, TNFRSF10C, TNFRSF1B, TNFSF13B, ZFP36	57			Inflammatory Disease	rheumatoid arthritis	rheumatoid arthritis	1.66e-30	AQP9, BCL6, CCL4, CCL8, CCR1, CD69, CLEC4E, CSF3R, CXCL5, CXCL6, CXCL10, CXCL14, FCN1, FGF2, FPR2, G0S2, GNLY, IL6, IL8, IL1B, IL7R, IL8RB, KCNJ15, LRRK2, MME, MMP3, NAMPT, OSM, PDE4B, PTGS2, PTPRC, S100A8, S100A9, S100A12, SPP1, TAGAP, TLR1, TLR2, TNFAIP6, TNFRSF10C	40
	Skeletal and Muscular Disorders	inflammatory arthropathy	inflammatory arthropathy	5.81e-16	CALD1, CCL2, CCL4, CCL8, CD69, CD86, CLEC4A, CSF2RB, CXCL5, CXCL6, FCER1G, FCGR2A, IGHD, IL6, IL7R, MME, MMP3, MMP10, NR3C1, PDE4B, PLAT, PLAU, PTGS1, PTGS2, S100A9, SOCS3, TAGAP, TFPI2, TLR1, VIM	30			Skeletal and Muscular Disorders	rheumatoid arthritis	rheumatoid arthritis	1.96e-41	AQP9, BCL6, CCL4, CCR1, CLEC4A, CLEC4E, CR1, CSF2RB, CSF3R, CXCL5, CXCL6, CXCL14, CYP4F3, DUSP1, FCN1, FGF2, FPR2, FRZB, G0S2, GADD45B, GCA, GNLY, HCK, HLA-DQA1, HLA-DRB4, ICAM1, IL6, IL8, IL1B, IL7R, IL8RA, IL8RB, KCNJ15, LRRK2, MME, MMP3, NAMPT, NCF4, OSM, P2RY13, PDE4B, PTGS2, PTPRC, S100A8, S100A9, S100A12, SPP1, TAGAP, TLR1, TLR2, TLR4, TNFAIP3, TNFAIP6, TNFRSF10C, TNFRSF1B, TNFSF13B, ZFP36	57			Skeletal and Muscular Disorders	rheumatoid arthritis	rheumatoid arthritis	1.66e-30	AQP9, BCL6, CCL4, CCL8, CCR1, CD69, CLEC4E, CSF3R, CXCL5, CXCL6, CXCL10, CXCL14, FCN1, FGF2, FPR2, G0S2, GNLY, IL6, IL8, IL1B, IL7R, IL8RB, KCNJ15, LRRK2, MME, MMP3, NAMPT, OSM, PDE4B, PTGS2, PTPRC, S100A8, S100A9, S100A12, SPP1, TAGAP, TLR1, TLR2, TNFAIP6, TNFRSF10C	40
	Skeletal and Muscular Disorders	skeletal and muscular disorder	skeletal and muscular disorder	5.81e-16	CALD1, CCL2, CCL4, CCL8, CD69, CD86, CLEC4A, CSF2RB, CXCL5, CXCL6, EDNRB, FCER1G, FCGR2A, IGHD, IL6, IL7R, MIRN155 (includes EG:114614), MME, MMP3, MMP10, NR3C1, PDE4B, PLAT, PLAU, PTGS1, PTGS2, RUNX2, S100A9, SGCE, SOCS3, SPG20, TAGAP, TFPI2, TLR1, TNFRSF11B, VIM	36			Immunological Disease	rheumatoid arthritis	rheumatoid arthritis	1.96e-41	AQP9, BCL6, CCL4, CCR1, CLEC4A, CLEC4E, CR1, CSF2RB, CSF3R, CXCL5, CXCL6, CXCL14, CYP4F3, DUSP1, FCN1, FGF2, FPR2, FRZB, G0S2, GADD45B, GCA, GNLY, HCK, HLA-DQA1, HLA-DRB4, ICAM1, IL6, IL8, IL1B, IL7R, IL8RA, IL8RB, KCNJ15, LRRK2, MME, MMP3, NAMPT, NCF4, OSM, P2RY13, PDE4B, PTGS2, PTPRC, S100A8, S100A9, S100A12, SPP1, TAGAP, TLR1, TLR2, TLR4, TNFAIP3, TNFAIP6, TNFRSF10C, TNFRSF1B, TNFSF13B, ZFP36	57			Immunological Disease	rheumatoid arthritis	rheumatoid arthritis	1.66e-30	AQP9, BCL6, CCL4, CCL8, CCR1, CD69, CLEC4E, CSF3R, CXCL5, CXCL6, CXCL10, CXCL14, FCN1, FGF2, FPR2, G0S2, GNLY, IL6, IL8, IL1B, IL7R, IL8RB, KCNJ15, LRRK2, MME, MMP3, NAMPT, OSM, PDE4B, PTGS2, PTPRC, S100A8, S100A9, S100A12, SPP1, TAGAP, TLR1, TLR2, TNFAIP6, TNFRSF10C	40
	Cancer	neoplasia	neoplasia	5.81e-16	ANTXR1, BICC1, C1S, CALD1, CAV1, CCL2, CD86, CDH11, COL12A1, CSF2RB, CXCR7, EBI2, EDNRB, EML1 (includes EG:2009), FLI1, FST, HGF, IGFBP5, IL6, IL13RA2, IL7R, INHBA, LOX, MIRN155 (includes EG:114614), MME, MMP3, MMP10, NNMT, NR3C1, PAPPA, PDE4B, PDPN, PI15, PLAT, PLAU, PSCDBP, PTGS1, PTGS2, RGS5, ROBO1, RUNX2, S100A9, SDC2, SERPINE1, SLC2A3, SOCS3, TBC1D9, TFPI, TFPI2, THBD, TNC, TNFRSF11B, VCAN, …	56			Skeletal and Muscular Disorders	skeletal and muscular disorder	skeletal and muscular disorder	5.63e-40	ALOX5AP, AQP9, BCL6, C5AR1, CCL4, CCR1, CD14, CLEC4A, CLEC4E, CR1, CSF3, CSF2RB, CSF3R, CXCL5, CXCL6, CXCL14, CYP4F3, DUSP1, DYSF, FCER1G, FCGR1A, FCGR2A, FCN1, FGF2, FPR2, FRZB, G0S2, GADD45B, GAS1, GCA, GNLY, HCK, HLA-DQA1, HLA-DRB4, ICAM1, IL6, IL8, IL1A, IL1B, IL1RN, IL7R, IL8RA, IL8RB, KCNJ15, LRRK2, MME, MMP3, MMP1 (includes EG:4312), NAMPT, NCF4, NR3C2, OSM, P2RY13, PDE4B, PTGS2, PTPRC, S1…	77			Skeletal and Muscular Disorders	skeletal and muscular disorder	skeletal and muscular disorder	2.27e-30	AQP9, BCL6, C5AR1, CCL4, CCL8, CCR1, CD69, CLEC4E, CSF3, CSF3R, CXCL5, CXCL6, CXCL10, CXCL14, FCGR2A, FCN1, FGF2, FPR2, G0S2, GAS1, GNLY, IL6, IL8, IL1A, IL1B, IL1RN, IL7R, IL8RB, KCNJ15, LRRK2, MME, MMP3, MMP10, MMP1 (includes EG:4312), NAMPT, OSM, PDE4B, PTGS2, PTPRC, S100A8, S100A9, S100A12, SOCS3, SOD2, SPP1, TAGAP, TFPI2, THBS2, TLR1, TLR2, TNFAIP6, TNFRSF10C, TNFRSF11B, TWIST1	54
	Cancer	cancer	cancer	1.3e-15	ANTXR1, C1S, CALD1, CAV1, CCL2, CD86, CDH11, COL12A1, CSF2RB, CXCR7, EBI2, EDNRB, FLI1, FST, HGF, IGFBP5, IL6, IL13RA2, IL7R, INHBA, LOX, MIRN155 (includes EG:114614), MME, MMP3, MMP10, NNMT, NR3C1, PAPPA, PDE4B, PDPN, PI15, PLAT, PLAU, PSCDBP, PTGS1, PTGS2, RGS5, ROBO1, RUNX2, S100A9, SDC2, SERPINE1, SLC2A3, SOCS3, TBC1D9, TFPI, TFPI2, THBD, TNC, TNFRSF11B, VCAN, VIM, WNT5A, ZEB1	54			Immune Response	immune response	immune response	1.03e-39	AIM2, AQP9, BCL6, C5AR1, CCL4, CCR1, CD14, CD93, CLEC7A, CSF3, CSF3R, CST7, CXCL6, CXCL11, DOK3, EREG, FCER1G, FCGR1A, FCGR2A, FCGR3B, FPR1, FYB, GBP2, GNLY, GPR65, HCK, HLA-DQA1, HOXB13, ICAM1, IFI44L, IGSF6, IL6, IL8, IL18RAP, IL1A, IL1B, IL1RN, IL7R, IL8RB, INDO, INHBA, ITGAM, ITGAX, LCP2, LILRA2, LILRA3, LILRA6, LILRB1, LILRB2, LY96, MX2, NCF4, NFIL3, OSM, PTGES, PTGS2, PTPRC, RGS2, SELE, SEL…	70			Immunological Disease	immunological disorder	immunological disorder	3.14e-29	AQP9, BCL6, CCL4, CCL8, CCR1, CD69, CLEC4E, COL7A1, CSF3, CSF3R, CXCL5, CXCL6, CXCL10, CXCL14, FCGR2A, FCN1, FGF2, FPR2, G0S2, GNLY, HGF, IL6, IL8, IL33, IL1B, IL1RN, IL7R, IL8RB, KCNJ15, LCP2, LRRK2, MME, MMP3, NAMPT, NCF2, OSM, PDE4B, PTGS2, PTPRC, S100A8, S100A9, S100A12, SELL, SLC11A1, SOCS3, SPP1, TAGAP, TLR1, TLR2, TLR8, TNFAIP6, TNFRSF10C, TNFRSF11B	53
	Connective Tissue Disorders	connective tissue disorder	connective tissue disorder	2.35e-15	CALD1, CCL2, CCL4, CCL8, CD69, CD86, CLEC4A, CSF2RB, CXCL5, CXCL6, EDNRB, FCER1G, FCGR2A, IGHD, IL6, IL7R, MIRN155 (includes EG:114614), MME, MMP3, MMP10, NR3C1, PDE4B, PLAT, PLAU, PTGS1, PTGS2, S100A9, SOCS3, TAGAP, TFPI2, TLR1, VIM	32			Immunological Disease	immunological disorder	immunological disorder	6.87e-39	AQP9, BCL6, CASP4, CCL4, CCR1, CD14, CLEC4A, CLEC4E, COL7A1, CR1, CSF3, CSF2RB, CSF3R, CXCL5, CXCL6, CXCL14, CYP4F3, DUSP1, FCER1G, FCGR1A, FCGR2A, FCN1, FGF2, FPR2, FRZB, G0S2, GADD45B, GCA, GNLY, HCK, HGF, HLA-DQA1, HLA-DQB1, HLA-DRB4, ICAM1, IL6, IL8, IL33, IL1B, IL1RN, IL7R, IL8RA, IL8RB, KCNJ15, LCP2, LRRK2, MME, MMP3, NAMPT, NCF2, NCF4, OSM, P2RY13, PDE4B, PTGS2, PTPRC, S100A8, S100A9, S100…	76			Immune Response	inflammatory response	inflammatory response	1.43e-28	BCL6, C5AR1, CCL4, CCL8, CCR1, CSF3, CSF3R, CXCL5, CXCL6, CXCL10, CXCL11, CXCL14, FCGR2A, FPR1, FPR2, GNLY, IL6, IL8, IL18RAP, IL1A, IL1B, IL1RN, IL8RB, INHBA, PDE4B, PTGS2, PTX3, RGS1, S100A8, S100A9, S100A12, SELE, SELL, SLC11A1, SOCS3, SPP1, THBS2, TLR2, TNFAIP6, TREM1	40
	Cancer	tumorigenesis	tumorigenesis	2.83e-15	ANTXR1, BICC1, C1S, CALD1, CAV1, CCL2, CD86, CDH11, COL12A1, CSF2RB, CXCR7, EBI2, EDNRB, EML1 (includes EG:2009), FLI1, FST, HGF, IGFBP5, IL6, IL13RA2, IL7R, INHBA, LOX, MIRN155 (includes EG:114614), MME, MMP3, MMP10, NNMT, NR3C1, PAPPA, PDE4B, PDPN, PI15, PLAT, PLAU, PSCDBP, PTGS1, PTGS2, RGS5, ROBO1, RUNX2, S100A9, SDC2, SERPINE1, SLC2A3, SOCS3, TBC1D9, TFPI, TFPI2, THBD, TLR1, TNC, TNFRSF11B, …	57			Immune Response	inflammatory response	inflammatory response	4.06e-35	ALOX5AP, BCL6, C5AR1, CASP4, CCL4, CCR1, CD14, CD93, CSF3, CSF3R, CXCL5, CXCL6, CXCL11, CXCL14, FCER1G, FCGR2A, FGR, FPR1, FPR2, GNLY, HCK, ICAM1, IL6, IL8, IL18RAP, IL1A, IL1B, IL1RN, IL8RA, IL8RB, INHBA, ITGAM, LILRA6, LY96, PDE4B, PTGES, PTGS2, PTX3, S100A8, S100A9, S100A12, SELE, SELL, SELP, SLC11A1, SOCS3, SPP1, THBS2, TLR2, TLR4, TNFAIP6, TNFRSF1B, TREM1, ZFP36	54			Immune Response	immune response	immune response	1.14e-27	AIM2, AQP9, BCL6, C5AR1, CCL4, CCL8, CCR1, CD69, CLEC7A, CSF3, CSF3R, CXCL6, CXCL10, CXCL11, EREG, FCGR2A, FCGR3B, FPR1, GNLY, IFI44L, IGSF6, IL6, IL8, IL18RAP, IL1A, IL1B, IL1RN, IL7R, IL8RB, INDO, INHBA, LCP2, LILRB1, LILRB2, OSM, PTGS2, PTPRC, RGS1, SELE, SELL, SLC11A1, SPP1, TLR1, TLR2, TLR8, TNC, TREM1	47
	Cellular Movement	cell movement	cell movement of cells	7.56e-15	CALD1, CAV1, CCL2, CCL4, CCL8, CD69, CD86, CDH11, CXCL5, CXCL6, CXCR7, DKK3, FCER1G, FCGR2A, FERMT2, HGF, IL6, INHBA, LCP2, PDE4B, PDPN, PLAT, PLAU, PTGS2, ROBO1, S100A9, SDC2, SELE, SERPINE1, SOCS3, TNFRSF11B, VCAN, VIM, WNT5A	34			Immune Response	cell movement	cell movement of neutrophils	9.15e-32	ALOX5AP, CCL4, CSF3, CSF3R, CXCL5, CXCL6, CXCL14, DUSP1, FCER1G, FCGR2A, FGR, FPR1, FPR2, HCK, ICAM1, IL6, IL8, IL1B, IL8RA, IL8RB, ITGAM, ITGAX, LILRA6, PDE4B, PTGS2, S100A8, S100A9, SELE, SELL, SELP, SOCS3, SPP1, TLR2, TLR4, TNFAIP3, TNFRSF1B	36			Cellular Movement	migration	migration of cells	2.83e-26	C5AR1, CCL4, CCL8, CCR1, CD69, COL7A1, CSF3, CSF3R, CXCL5, CXCL6, CXCL10, CXCL11, CXCL14, CYR61, FAP, FCGR2A, FGF2, FPR1, FPR2, GNLY, HGF, IL6, IL8, IL11, IL1A, IL1B, IL8RB, INHBA, MME, MMP3, MMP10, MMP1 (includes EG:4312), OSM, PDE4B, PROK2, PSCDBP, PTGS2, RGS1, RGS18, S100A8, S100A9, SELE, SELL, SERPINE1, SOCS3, SOD2, SPP1, STC1, TFPI, THBS2, TNC, TWIST1, VCAN, WNT5A	54
	Cellular Growth and Proliferation	proliferation	proliferation of eukaryotic cells	8.01e-15	CAV1, CAV2, CCL2, CCL4, CD86, COL8A1, CSF2RB, CXCR7, EDNRB, ENTPD1, FLI1, FST, FYB, HGF, IGFBP5, IL6, IL11, IL13RA2, IL7R, INHBA, LCP2, LILRB1, LOX, LY96, MMP3, NR3C1, PAPPA, PLAT, PLAU, PTGS1, PTGS2, RUNX2, S100A9, SDC2, SERPINE1, SLAMF7, SOCS3, STC1, TFPI, TFPI2, THBD, TNC, TNFRSF11B, VCAN, WIPF1, WNT5A	46			Cellular Movement	cell movement	cell movement of neutrophils	9.15e-32	ALOX5AP, CCL4, CSF3, CSF3R, CXCL5, CXCL6, CXCL14, DUSP1, FCER1G, FCGR2A, FGR, FPR1, FPR2, HCK, ICAM1, IL6, IL8, IL1B, IL8RA, IL8RB, ITGAM, ITGAX, LILRA6, PDE4B, PTGS2, S100A8, S100A9, SELE, SELL, SELP, SOCS3, SPP1, TLR2, TLR4, TNFAIP3, TNFRSF1B	36			Cellular Movement	migration	migration of eukaryotic cells	4.6e-26	C5AR1, CCL4, CCL8, CCR1, CD69, COL7A1, CSF3, CSF3R, CXCL5, CXCL6, CXCL10, CXCL11, CXCL14, CYR61, FCGR2A, FGF2, FPR1, FPR2, GNLY, HGF, IL6, IL8, IL11, IL1A, IL1B, IL8RB, INHBA, MME, MMP3, MMP10, MMP1 (includes EG:4312), OSM, PDE4B, PROK2, PSCDBP, PTGS2, RGS1, S100A8, S100A9, SELE, SELL, SERPINE1, SOCS3, SOD2, SPP1, STC1, TFPI, THBS2, TNC, TWIST1, VCAN, WNT5A	52
	Cellular Movement	cell movement	cell movement	1.69e-14	CALD1, CAV1, CCL2, CCL4, CCL8, CD69, CD86, CDH11, CXCL5, CXCL6, CXCR7, DKK3, FCER1G, FCGR2A, FERMT2, HGF, IL6, INHBA, LCP2, PDE4B, PDPN, PLAT, PLAU, PTGS2, ROBO1, S100A9, SDC2, SELE, SERPINE1, SOCS3, TNFRSF11B, VCAN, VIM, WNT5A	34			Hematological System Development and Function	cell movement	cell movement of neutrophils	9.15e-32	ALOX5AP, CCL4, CSF3, CSF3R, CXCL5, CXCL6, CXCL14, DUSP1, FCER1G, FCGR2A, FGR, FPR1, FPR2, HCK, ICAM1, IL6, IL8, IL1B, IL8RA, IL8RB, ITGAM, ITGAX, LILRA6, PDE4B, PTGS2, S100A8, S100A9, SELE, SELL, SELP, SOCS3, SPP1, TLR2, TLR4, TNFAIP3, TNFRSF1B	36			Cellular Movement	movement	movement of cells	4.64e-26	C5AR1, CCL4, CCL8, CCR1, CD69, COL7A1, CSF3, CSF3R, CXCL5, CXCL6, CXCL10, CXCL11, CXCL14, CYR61, FAP, FCGR2A, FGF2, FPR1, FPR2, GNLY, HGF, IL6, IL8, IL11, IL1A, IL1B, IL8RB, INHBA, MME, MMP3, MMP10, MMP1 (includes EG:4312), OSM, PDE4B, PROK2, PSCDBP, PTGS2, RGS1, RGS18, S100A8, S100A9, SELE, SELL, SERPINE1, SOCS3, SOD2, SPP1, STC1, TFPI, THBS2, TNC, TWIST1, VCAN, WNT5A	54
	Tissue Morphology	quantity	quantity of cells	1.24e-13	ABCA1, CAV1, CAV2, CCL2, CD69, CD86, CSF2RB, DKK3, EDNRB, FCER1G, FCGR2A, FLI1, FST, HGF, IGFBP5, IL6, IL11, IL7R, INHBA, LCP2, MMP3, NR3C1, PDE4B, PLAT, PLAU, PSCDBP, PTGS2, RUNX2, S100A9, SELE, SOCS3, SRGN, ST8SIA4, STC1, TNC, TNFRSF11B	36			Cellular Movement	cell movement	cell movement of phagocytes	2.28e-29	ALOX5AP, CCL4, CSF3, CSF3R, CXCL5, CXCL6, CXCL14, DUSP1, FCER1G, FCGR2A, FGR, FPR1, FPR2, GNLY, HCK, HGF, ICAM1, IL6, IL8, IL1B, IL8RA, IL8RB, INHBA, ITGAM, ITGAX, LILRA6, PDE4B, PTGES, PTGS2, S100A8, S100A9, SELE, SELL, SELP, SOCS3, SPP1, TLR2, TLR4, TNFAIP3, TNFRSF1B	40			Cellular Movement	movement	movement of eukaryotic cells	7.89e-26	C5AR1, CCL4, CCL8, CCR1, CD69, COL7A1, CSF3, CSF3R, CXCL5, CXCL6, CXCL10, CXCL11, CXCL14, CYR61, FCGR2A, FGF2, FPR1, FPR2, GNLY, HGF, IL6, IL8, IL11, IL1A, IL1B, IL8RB, INHBA, MME, MMP3, MMP10, MMP1 (includes EG:4312), OSM, PDE4B, PROK2, PSCDBP, PTGS2, RGS1, S100A8, S100A9, SELE, SELL, SERPINE1, SOCS3, SOD2, SPP1, STC1, TFPI, THBS2, TNC, TWIST1, VCAN, WNT5A	52
	Cellular Movement	cell movement	cell movement of eukaryotic cells	4.59e-13	CAV1, CCL2, CCL4, CCL8, CD69, CD86, CDH11, CXCL5, CXCL6, CXCR7, DKK3, FCER1G, FCGR2A, FERMT2, HGF, IL6, INHBA, LCP2, PDE4B, PLAT, PLAU, PTGS2, ROBO1, S100A9, SDC2, SELE, SERPINE1, SOCS3, TNFRSF11B, WNT5A	30			Hematological System Development and Function	cell movement	cell movement of phagocytes	2.28e-29	ALOX5AP, CCL4, CSF3, CSF3R, CXCL5, CXCL6, CXCL14, DUSP1, FCER1G, FCGR2A, FGR, FPR1, FPR2, GNLY, HCK, HGF, ICAM1, IL6, IL8, IL1B, IL8RA, IL8RB, INHBA, ITGAM, ITGAX, LILRA6, PDE4B, PTGES, PTGS2, S100A8, S100A9, SELE, SELL, SELP, SOCS3, SPP1, TLR2, TLR4, TNFAIP3, TNFRSF1B	40			Cellular Movement	migration	migration of leukocytes	5.08e-24	C5AR1, CCL4, CCL8, CCR1, CD69, CSF3R, CXCL5, CXCL6, CXCL10, CXCL11, CXCL14, FCGR2A, FPR1, FPR2, GNLY, HGF, IL6, IL8, IL1B, IL8RB, INHBA, PDE4B, PROK2, PSCDBP, RGS1, S100A8, S100A9, SELE, SELL, SERPINE1, SOCS3, SPP1, THBS2	33
	Tissue Morphology	quantity	quantity of lymphatic system cells	1.11e-12	ABCA1, CCL2, CD69, CD86, CSF2RB, DKK3, FCER1G, FCGR2A, FLI1, IL6, IL11, IL7R, INHBA, LCP2, MMP3, NR3C1, PDE4B, PLAT, PLAU, PSCDBP, RUNX2, S100A9, SELE, SOCS3, TNFRSF11B	25			Immune Response	cell movement	cell movement of granulocytes	4.68e-29	ALOX5AP, CCL4, CCR1, CSF3, CSF3R, CXCL5, CXCL6, CXCL14, DUSP1, FCER1G, FCGR2A, FGR, FPR1, FPR2, HCK, ICAM1, IL6, IL8, IL1B, IL8RA, IL8RB, ITGAM, ITGAX, LILRA6, OSM, PDE4B, PTGS2, S100A8, S100A9, SELE, SELL, SELP, SOCS3, SPP1, TLR2, TLR4, TNFAIP3, TNFRSF1B	38			Cellular Movement	movement	movement of leukocytes	5.08e-24	C5AR1, CCL4, CCL8, CCR1, CD69, CSF3R, CXCL5, CXCL6, CXCL10, CXCL11, CXCL14, FCGR2A, FPR1, FPR2, GNLY, HGF, IL6, IL8, IL1B, IL8RB, INHBA, PDE4B, PROK2, PSCDBP, RGS1, S100A8, S100A9, SELE, SELL, SERPINE1, SOCS3, SPP1, THBS2	33
	Immune and Lymphatic System Development and Function	quantity	quantity of lymphatic system cells	1.11e-12	ABCA1, CCL2, CD69, CD86, CSF2RB, DKK3, FCER1G, FCGR2A, FLI1, IL6, IL11, IL7R, INHBA, LCP2, MMP3, NR3C1, PDE4B, PLAT, PLAU, PSCDBP, RUNX2, S100A9, SELE, SOCS3, TNFRSF11B	25			Cellular Movement	cell movement	cell movement of granulocytes	4.68e-29	ALOX5AP, CCL4, CCR1, CSF3, CSF3R, CXCL5, CXCL6, CXCL14, DUSP1, FCER1G, FCGR2A, FGR, FPR1, FPR2, HCK, ICAM1, IL6, IL8, IL1B, IL8RA, IL8RB, ITGAM, ITGAX, LILRA6, OSM, PDE4B, PTGS2, S100A8, S100A9, SELE, SELL, SELP, SOCS3, SPP1, TLR2, TLR4, TNFAIP3, TNFRSF1B	38			Cellular Movement	chemotaxis	chemotaxis	6.01e-24	C5AR1, CCL4, CCL8, CCR1, CD69, CSF3R, CXCL5, CXCL6, CXCL10, CXCL11, CXCL14, CYR61, FCGR2A, FGF2, FPR1, FPR2, GNLY, HGF, IL6, IL8, IL1A, IL1B, IL8RB, INHBA, PDE4B, PROK2, PTGS2, RGS1, S100A8, S100A9, SELE, SOCS3, SPP1, THBS2, TLR2	35
	Immunological Disease	autoimmune disease	autoimmune disease	1.81e-12	ABCA1, C1S, CALD1, CCL2, CCL4, CCL8, CD69, CD86, CLEC4A, CSF2RB, CXCL5, CXCL6, FCGR2A, IL6, IL7R, MME, MMP3, NR3C1, PDE4B, PLAT, PTGS1, PTGS2, S100A9, SOCS3, TAGAP, TLR1, VIM	27			Hematological System Development and Function	cell movement	cell movement of granulocytes	4.68e-29	ALOX5AP, CCL4, CCR1, CSF3, CSF3R, CXCL5, CXCL6, CXCL14, DUSP1, FCER1G, FCGR2A, FGR, FPR1, FPR2, HCK, ICAM1, IL6, IL8, IL1B, IL8RA, IL8RB, ITGAM, ITGAX, LILRA6, OSM, PDE4B, PTGS2, S100A8, S100A9, SELE, SELL, SELP, SOCS3, SPP1, TLR2, TLR4, TNFAIP3, TNFRSF1B	38			Cellular Movement	homing	homing of cells	6.01e-24	C5AR1, CCL4, CCL8, CCR1, CD69, CSF3, CSF3R, CXCL5, CXCL6, CXCL10, CXCL11, CXCL14, CYR61, FCGR2A, FGF2, FPR1, FPR2, GNLY, HGF, IL6, IL8, IL1A, IL1B, IL8RB, INHBA, PDE4B, PTGS2, RGS1, S100A8, S100A9, SELE, SOCS3, SPP1, THBS2, TLR2	35
	Connective Tissue Disorders	rheumatoid arthritis	rheumatoid arthritis	3.11e-12	CALD1, CCL2, CCL4, CCL8, CD69, CD86, CLEC4A, CSF2RB, CXCL5, CXCL6, IL6, IL7R, MME, MMP3, NR3C1, PDE4B, PTGS1, PTGS2, S100A9, TAGAP, TLR1, VIM	22			Cellular Movement	migration	migration of cells	7.13e-29	ANPEP, C5AR1, CCL4, CCR1, CDX2, COL7A1, CSF3, CSF2RB, CSF3R, CXCL5, CXCL6, CXCL11, CXCL14, DUSP1, EGR1, FAP, FCER1G, FCGR2A, FGF2, FGR, FPR1, FPR2, FYB, GNLY, HCK, HGF, ICAM1, IGFBP5, IL6, IL8, IL11, IL1A, IL1B, IL8RA, IL8RB, INHBA, ITGAM, ITGAX, KLK6, LILRA6, MME, MMP3, MMP1 (includes EG:4312), OSM, PDE4B, PDGFD, PREX1, PROK2, PTGS2, RGS18, S100A8, S100A9, SELE, SELL, SELP, SERPINB2, SERPINE1, S…	71			Cellular Movement	homing	homing of eukaryotic cells	6.09e-24	C5AR1, CCL4, CCL8, CCR1, CD69, CSF3, CSF3R, CXCL5, CXCL6, CXCL10, CXCL11, CXCL14, FCGR2A, FGF2, FPR1, FPR2, GNLY, HGF, IL6, IL8, IL1A, IL1B, IL8RB, INHBA, PDE4B, PTGS2, RGS1, S100A8, S100A9, SELE, SOCS3, SPP1, THBS2, TLR2	34
	Inflammatory Disease	rheumatoid arthritis	rheumatoid arthritis	3.11e-12	CALD1, CCL2, CCL4, CCL8, CD69, CD86, CLEC4A, CSF2RB, CXCL5, CXCL6, IL6, IL7R, MME, MMP3, NR3C1, PDE4B, PTGS1, PTGS2, S100A9, TAGAP, TLR1, VIM	22			Cellular Movement	cell movement	cell movement of lymphatic system cells	7.6e-29	ALOX5AP, C5AR1, CCL4, CCR1, CSF3, CSF3R, CXCL5, CXCL6, CXCL11, CXCL14, DUSP1, FCER1G, FCGR2A, FGR, FPR1, FPR2, GNLY, HCK, HGF, ICAM1, IL6, IL8, IL1A, IL1B, IL8RA, IL8RB, INHBA, ITGAM, ITGAX, LCP2, LILRA6, OSM, PDE4B, PTGES, PTGS2, S100A8, S100A9, SELE, SELL, SELP, SOCS3, SPP1, THBS2, TLR2, TLR4, TNFAIP3, TNFRSF1B	47			Cellular Movement	cell movement	cell movement of lymphatic system cells	6.47e-24	C5AR1, CCL4, CCL8, CCR1, CSF3, CSF3R, CXCL5, CXCL6, CXCL10, CXCL11, CXCL14, FCGR2A, FPR1, FPR2, GNLY, HGF, IL6, IL8, IL1A, IL1B, IL8RB, INHBA, LCP2, OSM, PDE4B, PTGS2, RGS1, S100A8, S100A9, SELE, SELL, SOCS3, SPP1, THBS2, TLR2	35
	Skeletal and Muscular Disorders	rheumatoid arthritis	rheumatoid arthritis	3.11e-12	CALD1, CCL2, CCL4, CCL8, CD69, CD86, CLEC4A, CSF2RB, CXCL5, CXCL6, IL6, IL7R, MME, MMP3, NR3C1, PDE4B, PTGS1, PTGS2, S100A9, TAGAP, TLR1, VIM	22			Immune Response	cell movement	cell movement of myeloid cells	7.85e-29	ALOX5AP, CCL4, CCR1, CSF3, CSF3R, CXCL5, CXCL6, CXCL14, DUSP1, FCER1G, FCGR2A, FGR, FPR1, FPR2, HCK, ICAM1, IL6, IL8, IL1B, IL8RA, IL8RB, ITGAM, ITGAX, LILRA6, OSM, PDE4B, PTGS2, S100A8, S100A9, SELE, SELL, SELP, SOCS3, SPP1, TLR2, TLR4, TNFAIP3, TNFRSF1B	38			Cellular Movement	cell movement	cell movement	8.1e-24	C5AR1, CCL4, CCL8, CCR1, CD69, CSF3, CSF3R, CXCL5, CXCL6, CXCL10, CXCL11, CXCL14, CYR61, FCGR2A, FGF2, FPR1, FPR2, GNLY, HGF, IL6, IL8, IL1A, IL1B, IL8RB, INHBA, LCP2, NRCAM, OSM, PDE4B, PROK2, PTGS2, PYY, RGS1, S100A8, S100A9, SELE, SELL, SERPINE1, SOCS3, SPP1, THBS2, TLR2, TNFRSF11B, TWIST1, VCAN, VNN2, WNT5A	47
	Immunological Disease	rheumatoid arthritis	rheumatoid arthritis	3.11e-12	CALD1, CCL2, CCL4, CCL8, CD69, CD86, CLEC4A, CSF2RB, CXCL5, CXCL6, IL6, IL7R, MME, MMP3, NR3C1, PDE4B, PTGS1, PTGS2, S100A9, TAGAP, TLR1, VIM	22			Cellular Movement	cell movement	cell movement of myeloid cells	7.85e-29	ALOX5AP, CCL4, CCR1, CSF3, CSF3R, CXCL5, CXCL6, CXCL14, DUSP1, FCER1G, FCGR2A, FGR, FPR1, FPR2, HCK, ICAM1, IL6, IL8, IL1B, IL8RA, IL8RB, ITGAM, ITGAX, LILRA6, OSM, PDE4B, PTGS2, S100A8, S100A9, SELE, SELL, SELP, SOCS3, SPP1, TLR2, TLR4, TNFAIP3, TNFRSF1B	38			Cellular Movement	chemotaxis	chemotaxis of cells	8.36e-24	C5AR1, CCL4, CCL8, CCR1, CD69, CSF3R, CXCL5, CXCL6, CXCL10, CXCL11, CXCL14, CYR61, FCGR2A, FGF2, FPR1, FPR2, GNLY, HGF, IL6, IL8, IL1A, IL1B, IL8RB, INHBA, PDE4B, PTGS2, RGS1, S100A8, S100A9, SELE, SOCS3, SPP1, THBS2, TLR2	34
	Tissue Morphology	quantity	quantity of blood cells	5.36e-12	ABCA1, CCL2, CD69, CD86, CSF2RB, DKK3, FCER1G, FCGR2A, FLI1, HGF, IL6, IL11, IL7R, INHBA, LCP2, MMP3, NR3C1, PDE4B, PLAT, PLAU, PSCDBP, RUNX2, S100A9, SELE, SOCS3	25			Hematological System Development and Function	cell movement	cell movement of myeloid cells	7.85e-29	ALOX5AP, CCL4, CCR1, CSF3, CSF3R, CXCL5, CXCL6, CXCL14, DUSP1, FCER1G, FCGR2A, FGR, FPR1, FPR2, HCK, ICAM1, IL6, IL8, IL1B, IL8RA, IL8RB, ITGAM, ITGAX, LILRA6, OSM, PDE4B, PTGS2, S100A8, S100A9, SELE, SELL, SELP, SOCS3, SPP1, TLR2, TLR4, TNFAIP3, TNFRSF1B	38			Cellular Movement	chemotaxis	chemotaxis of eukaryotic cells	1.05e-23	C5AR1, CCL4, CCL8, CCR1, CD69, CSF3R, CXCL5, CXCL6, CXCL10, CXCL11, CXCL14, FCGR2A, FGF2, FPR1, FPR2, GNLY, HGF, IL6, IL8, IL1A, IL1B, IL8RB, INHBA, PDE4B, PTGS2, RGS1, S100A8, S100A9, SELE, SOCS3, SPP1, THBS2, TLR2	33
	Hematological System Development and Function	quantity	quantity of blood cells	5.36e-12	ABCA1, CCL2, CD69, CD86, CSF2RB, DKK3, FCER1G, FCGR2A, FLI1, HGF, IL6, IL11, IL7R, INHBA, LCP2, MMP3, NR3C1, PDE4B, PLAT, PLAU, PSCDBP, RUNX2, S100A9, SELE, SOCS3	25			Immune Response	cell movement	cell movement of bone marrow cells	1.35e-28	ALOX5AP, CCL4, CCR1, CSF3, CSF3R, CXCL5, CXCL6, CXCL14, DUSP1, FCER1G, FCGR2A, FGR, FPR1, FPR2, HCK, ICAM1, IL6, IL8, IL1B, IL8RA, IL8RB, ITGAM, ITGAX, LILRA6, OSM, PDE4B, PTGS2, S100A8, S100A9, SELE, SELL, SELP, SOCS3, SPP1, TLR2, TLR4, TNFAIP3, TNFRSF1B	38			Cellular Movement	migration	migration of blood cells	1.17e-23	C5AR1, CCL4, CCL8, CCR1, CD69, CSF3R, CXCL5, CXCL6, CXCL10, CXCL11, CXCL14, FCGR2A, FPR1, FPR2, GNLY, HGF, IL6, IL8, IL1B, IL8RB, INHBA, PDE4B, PROK2, PSCDBP, RGS1, S100A8, S100A9, SELE, SELL, SERPINE1, SOCS3, SPP1, THBS2	33
	Immunological Disease	immunological disorder	immunological disorder	7.45e-12	ABCA1, C1S, CALD1, CCL2, CCL4, CCL8, CD69, CD86, CLEC4A, CSF2RB, CXCL5, CXCL6, FCER1G, FCGR2A, HGF, IL6, IL7R, LCP2, MME, MMP3, NR3C1, PDE4B, PLAT, PTGS1, PTGS2, S100A9, SOCS3, TAGAP, TLR1, TNFRSF11B, VIM	31			Cellular Movement	cell movement	cell movement of bone marrow cells	1.35e-28	ALOX5AP, CCL4, CCR1, CSF3, CSF3R, CXCL5, CXCL6, CXCL14, DUSP1, FCER1G, FCGR2A, FGR, FPR1, FPR2, HCK, ICAM1, IL6, IL8, IL1B, IL8RA, IL8RB, ITGAM, ITGAX, LILRA6, OSM, PDE4B, PTGS2, S100A8, S100A9, SELE, SELL, SELP, SOCS3, SPP1, TLR2, TLR4, TNFAIP3, TNFRSF1B	38			Cellular Movement	movement	movement of blood cells	1.17e-23	C5AR1, CCL4, CCL8, CCR1, CD69, CSF3R, CXCL5, CXCL6, CXCL10, CXCL11, CXCL14, FCGR2A, FPR1, FPR2, GNLY, HGF, IL6, IL8, IL1B, IL8RB, INHBA, PDE4B, PROK2, PSCDBP, RGS1, S100A8, S100A9, SELE, SELL, SERPINE1, SOCS3, SPP1, THBS2	33
	Cellular Movement	migration	migration of leukocytes	2.7e-11	CCL2, CCL4, CCL8, CD69, CXCL5, CXCL6, CXCR7, FCER1G, FCGR2A, FYB, HGF, IL6, INHBA, PDE4B, PLAU, PSCDBP, S100A9, SELE, SERPINE1, SOCS3	20			Cellular Movement	migration	migration of eukaryotic cells	1.35e-28	ANPEP, C5AR1, CCL4, CCR1, CDX2, COL7A1, CSF3, CSF2RB, CSF3R, CXCL5, CXCL6, CXCL11, CXCL14, DUSP1, EGR1, FCER1G, FCGR2A, FGF2, FGR, FPR1, FPR2, FYB, GNLY, HCK, HGF, ICAM1, IGFBP5, IL6, IL8, IL11, IL1A, IL1B, IL8RA, IL8RB, INHBA, ITGAM, ITGAX, KLK6, LILRA6, MME, MMP3, MMP1 (includes EG:4312), OSM, PDE4B, PDGFD, PREX1, PROK2, PTGS2, S100A8, S100A9, SELE, SELL, SELP, SERPINB2, SERPINE1, SLC16A4, SOCS…	68			Cellular Movement	cell movement	cell movement of cells	1.73e-23	C5AR1, CCL4, CCL8, CCR1, CD69, CSF3, CSF3R, CXCL5, CXCL6, CXCL10, CXCL11, CXCL14, CYR61, FCGR2A, FGF2, FPR1, FPR2, GNLY, HGF, IL6, IL8, IL1A, IL1B, IL8RB, INHBA, LCP2, NRCAM, OSM, PDE4B, PTGS2, PYY, RGS1, S100A8, S100A9, SELE, SELL, SERPINE1, SOCS3, SPP1, THBS2, TLR2, TNFRSF11B, TWIST1, VCAN, VNN2, WNT5A	46
	Cellular Movement	movement	movement of leukocytes	2.7e-11	CCL2, CCL4, CCL8, CD69, CXCL5, CXCL6, CXCR7, FCER1G, FCGR2A, FYB, HGF, IL6, INHBA, PDE4B, PLAU, PSCDBP, S100A9, SELE, SERPINE1, SOCS3	20			Cellular Movement	movement	movement of cells	1.35e-28	ANPEP, C5AR1, CCL4, CCR1, CDX2, COL7A1, CSF3, CSF2RB, CSF3R, CXCL5, CXCL6, CXCL11, CXCL14, DUSP1, EGR1, FAP, FCER1G, FCGR2A, FGF2, FGR, FPR1, FPR2, FYB, GNLY, HCK, HGF, ICAM1, IGFBP5, IL6, IL8, IL11, IL1A, IL1B, IL8RA, IL8RB, INHBA, ITGAM, ITGAX, KLK6, LILRA6, MME, MMP3, MMP1 (includes EG:4312), OSM, PDE4B, PDGFD, PREX1, PROK2, PTGS2, RGS18, S100A8, S100A9, SELE, SELL, SELP, SERPINB2, SERPINE1, S…	71			Cellular Movement	homing	homing of lymphatic system cells	6.39e-23	C5AR1, CCL4, CCL8, CCR1, CSF3, CSF3R, CXCL5, CXCL6, CXCL10, CXCL11, CXCL14, FCGR2A, FPR1, FPR2, GNLY, IL8, IL1A, IL1B, IL8RB, INHBA, PDE4B, RGS1, S100A8, S100A9, SELE, SOCS3, SPP1, THBS2	28
	Cancer	tumor	tumor	4.16e-11	ANTXR1, C1S, CAV1, CCL2, CD86, CDH11, COL12A1, CSF2RB, EDNRB, FLI1, HGF, IGFBP5, IL6, IL13RA2, IL7R, INHBA, LOX, MIRN155 (includes EG:114614), MME, MMP3, MMP10, NNMT, NR3C1, PDE4B, PDPN, PLAT, PLAU, PTGS1, PTGS2, RGS5, RUNX2, S100A9, SDC2, SOCS3, TBC1D9, TFPI2, THBD, TLR1, TNC, VCAN, VIM, WNT5A	42			Cellular Movement	movement	movement of eukaryotic cells	3.06e-28	ANPEP, C5AR1, CCL4, CCR1, CDX2, COL7A1, CSF3, CSF2RB, CSF3R, CXCL5, CXCL6, CXCL11, CXCL14, DUSP1, EGR1, FCER1G, FCGR2A, FGF2, FGR, FPR1, FPR2, FYB, GNLY, HCK, HGF, ICAM1, IGFBP5, IL6, IL8, IL11, IL1A, IL1B, IL8RA, IL8RB, INHBA, ITGAM, ITGAX, KLK6, LILRA6, MME, MMP3, MMP1 (includes EG:4312), OSM, PDE4B, PDGFD, PREX1, PROK2, PTGS2, S100A8, S100A9, SELE, SELL, SELP, SERPINB2, SERPINE1, SLC16A4, SOCS…	68			Cellular Movement	chemotaxis	chemotaxis of lymphatic system cells	1.93e-22	C5AR1, CCL4, CCL8, CCR1, CSF3R, CXCL5, CXCL6, CXCL10, CXCL11, CXCL14, FCGR2A, FPR1, FPR2, GNLY, IL8, IL1A, IL1B, IL8RB, INHBA, PDE4B, RGS1, S100A8, S100A9, SELE, SOCS3, SPP1, THBS2	27
	Cellular Movement	chemotaxis	chemotaxis of eukaryotic cells	4.64e-11	CAV1, CCL2, CCL4, CCL8, CD69, CXCL5, CXCL6, CXCR7, FCER1G, FCGR2A, HGF, IL6, INHBA, PDE4B, PLAU, PTGS2, ROBO1, S100A9, SELE, SOCS3	20			Cellular Movement	cell movement	cell movement of blood cells	9.11e-28	ALOX5AP, C5AR1, CCL4, CCR1, CD14, CSF3, CSF3R, CXCL5, CXCL6, CXCL11, CXCL14, DUSP1, FCER1G, FCGR2A, FGR, FPR1, FPR2, GNLY, HCK, HGF, ICAM1, IL6, IL8, IL1B, IL8RA, IL8RB, INHBA, ITGAM, ITGAX, LILRA6, OSM, PDE4B, PTGES, PTGS2, S100A8, S100A9, SELE, SELL, SELP, SOCS3, SPP1, THBS2, TLR2, TLR4, TNFAIP3, TNFRSF11B, TNFRSF1B	47			Immune Response	cell movement	cell movement of leukocytes	3.92e-22	C5AR1, CCL4, CCL8, CCR1, CSF3, CSF3R, CXCL5, CXCL6, CXCL10, CXCL11, CXCL14, FCGR2A, FPR1, FPR2, GNLY, IL6, IL8, IL1B, IL8RB, INHBA, OSM, PDE4B, PTGS2, RGS1, S100A8, S100A9, SELE, SELL, SOCS3, SPP1, THBS2, TLR2, TNFRSF11B	33
	Cellular Movement	migration	migration of blood cells	4.69e-11	CCL2, CCL4, CCL8, CD69, CXCL5, CXCL6, CXCR7, FCER1G, FCGR2A, FYB, HGF, IL6, INHBA, PDE4B, PLAU, PSCDBP, S100A9, SELE, SERPINE1, SOCS3	20			Immune Response	cell movement	cell movement of leukocytes	2.27e-27	ALOX5AP, C5AR1, CCL4, CCR1, CD14, CSF3, CSF3R, CXCL5, CXCL6, CXCL11, CXCL14, DUSP1, FCER1G, FCGR2A, FGR, FPR1, FPR2, GNLY, HCK, ICAM1, IL6, IL8, IL1B, IL8RA, IL8RB, INHBA, ITGAM, ITGAX, LILRA6, OSM, PDE4B, PTGS2, S100A8, S100A9, SELE, SELL, SELP, SOCS3, SPP1, THBS2, TLR2, TLR4, TNFAIP3, TNFRSF11B, TNFRSF1B	45			Cellular Movement	cell movement	cell movement of leukocytes	3.92e-22	C5AR1, CCL4, CCL8, CCR1, CSF3, CSF3R, CXCL5, CXCL6, CXCL10, CXCL11, CXCL14, FCGR2A, FPR1, FPR2, GNLY, IL6, IL8, IL1B, IL8RB, INHBA, OSM, PDE4B, PTGS2, RGS1, S100A8, S100A9, SELE, SELL, SOCS3, SPP1, THBS2, TLR2, TNFRSF11B	33
	Cellular Movement	movement	movement of blood cells	4.69e-11	CCL2, CCL4, CCL8, CD69, CXCL5, CXCL6, CXCR7, FCER1G, FCGR2A, FYB, HGF, IL6, INHBA, PDE4B, PLAU, PSCDBP, S100A9, SELE, SERPINE1, SOCS3	20			Cellular Movement	cell movement	cell movement of leukocytes	2.27e-27	ALOX5AP, C5AR1, CCL4, CCR1, CD14, CSF3, CSF3R, CXCL5, CXCL6, CXCL11, CXCL14, DUSP1, FCER1G, FCGR2A, FGR, FPR1, FPR2, GNLY, HCK, ICAM1, IL6, IL8, IL1B, IL8RA, IL8RB, INHBA, ITGAM, ITGAX, LILRA6, OSM, PDE4B, PTGS2, S100A8, S100A9, SELE, SELL, SELP, SOCS3, SPP1, THBS2, TLR2, TLR4, TNFAIP3, TNFRSF11B, TNFRSF1B	45			Hematological System Development and Function	cell movement	cell movement of leukocytes	3.92e-22	C5AR1, CCL4, CCL8, CCR1, CSF3, CSF3R, CXCL5, CXCL6, CXCL10, CXCL11, CXCL14, FCGR2A, FPR1, FPR2, GNLY, IL6, IL8, IL1B, IL8RB, INHBA, OSM, PDE4B, PTGS2, RGS1, S100A8, S100A9, SELE, SELL, SOCS3, SPP1, THBS2, TLR2, TNFRSF11B	33
	Cell-To-Cell Signaling and Interaction	activation	activation of eukaryotic cells	4.69e-11	CCL2, CCL4, CCL8, CD86, CXCL5, CXCL6, ENTPD1, FCER1G, FCGR2A, FYB, HGF, IL6, IL11, LCP2, LILRB1, LY96, PLAT, PLAU, PTGS2, SDC2, SELE, STC1, TNC, TNFRSF11B, VIM	25			Hematological System Development and Function	cell movement	cell movement of leukocytes	2.27e-27	ALOX5AP, C5AR1, CCL4, CCR1, CD14, CSF3, CSF3R, CXCL5, CXCL6, CXCL11, CXCL14, DUSP1, FCER1G, FCGR2A, FGR, FPR1, FPR2, GNLY, HCK, ICAM1, IL6, IL8, IL1B, IL8RA, IL8RB, INHBA, ITGAM, ITGAX, LILRA6, OSM, PDE4B, PTGS2, S100A8, S100A9, SELE, SELL, SELP, SOCS3, SPP1, THBS2, TLR2, TLR4, TNFAIP3, TNFRSF11B, TNFRSF1B	45			Cellular Movement	cell movement	cell movement of blood cells	4.95e-22	C5AR1, CCL4, CCL8, CCR1, CSF3, CSF3R, CXCL5, CXCL6, CXCL10, CXCL11, CXCL14, FCGR2A, FPR1, FPR2, GNLY, HGF, IL6, IL8, IL1B, IL8RB, INHBA, OSM, PDE4B, PTGS2, RGS1, S100A8, S100A9, SELE, SELL, SOCS3, SPP1, THBS2, TLR2, TNFRSF11B	34
	Tissue Morphology	quantity	quantity of leukocytes	8.06e-11	ABCA1, CD69, CD86, CSF2RB, DKK3, FCER1G, FCGR2A, FLI1, HGF, IL6, IL11, IL7R, INHBA, LCP2, MMP3, NR3C1, PDE4B, PSCDBP, RUNX2, S100A9, SELE, SOCS3	22			Cell-To-Cell Signaling and Interaction	activation	activation of cells	2.68e-26	BCL2A1, C5AR1, CCL4, CD14, CD93, CLEC7A, CSF3, CXCL5, CXCL6, DOK3, FCER1G, FCGR1A, FCGR2A, FGF2, FPR1, FYB, GNLY, HCK, HGF, HLA-DQA1, ICAM1, IL6, IL8, IL11, IL18RAP, IL1A, IL1B, IL1RN, IL8RA, IL8RB, ITGAM, ITGAX, LCP2, LILRA6, LILRB1, LY96, MMP1 (includes EG:4312), PTGES, PTGS2, PTPRC, SELE, SELL, SLC11A1, SPP1, STC1, TLR2, TLR4, TLR8, TNC, TNFRSF11B, TNFRSF1B, TNFSF13B, TREM1	53			Immune Response	chemotaxis	chemotaxis of leukocytes	7.86e-22	C5AR1, CCL4, CCL8, CCR1, CSF3R, CXCL5, CXCL6, CXCL10, CXCL11, CXCL14, FCGR2A, FPR1, FPR2, GNLY, IL8, IL1B, IL8RB, INHBA, PDE4B, RGS1, S100A8, S100A9, SELE, SOCS3, SPP1, THBS2	26
	Immune and Lymphatic System Development and Function	quantity	quantity of leukocytes	8.06e-11	ABCA1, CD69, CD86, CSF2RB, DKK3, FCER1G, FCGR2A, FLI1, HGF, IL6, IL11, IL7R, INHBA, LCP2, MMP3, NR3C1, PDE4B, PSCDBP, RUNX2, S100A9, SELE, SOCS3	22			Cell-To-Cell Signaling and Interaction	activation	activation of eukaryotic cells	4.95e-26	BCL2A1, C5AR1, CCL4, CD14, CD93, CLEC7A, CSF3, CXCL5, CXCL6, DOK3, FCER1G, FCGR1A, FCGR2A, FGF2, FPR1, FYB, GNLY, HCK, HGF, HLA-DQA1, ICAM1, IL6, IL8, IL11, IL18RAP, IL1A, IL1B, IL1RN, IL8RA, IL8RB, ITGAM, LCP2, LILRA6, LILRB1, LY96, MMP1 (includes EG:4312), PTGES, PTGS2, PTPRC, SELE, SELL, SLC11A1, SPP1, STC1, TLR2, TLR4, TLR8, TNC, TNFRSF11B, TNFRSF1B, TNFSF13B, TREM1	52			Cellular Movement	chemotaxis	chemotaxis of leukocytes	7.86e-22	C5AR1, CCL4, CCL8, CCR1, CSF3R, CXCL5, CXCL6, CXCL10, CXCL11, CXCL14, FCGR2A, FPR1, FPR2, GNLY, IL8, IL1B, IL8RB, INHBA, PDE4B, RGS1, S100A8, S100A9, SELE, SOCS3, SPP1, THBS2	26
	Hematological System Development and Function	quantity	quantity of leukocytes	8.06e-11	ABCA1, CD69, CD86, CSF2RB, DKK3, FCER1G, FCGR2A, FLI1, HGF, IL6, IL11, IL7R, INHBA, LCP2, MMP3, NR3C1, PDE4B, PSCDBP, RUNX2, S100A9, SELE, SOCS3	22			Cellular Movement	migration	migration of leukocytes	8.13e-26	C5AR1, CCL4, CCR1, CSF3R, CXCL5, CXCL6, CXCL11, CXCL14, FCER1G, FCGR2A, FGR, FPR1, FPR2, FYB, GNLY, HCK, HGF, ICAM1, IL6, IL8, IL1B, IL8RA, IL8RB, INHBA, ITGAM, ITGAX, LILRA6, PDE4B, PROK2, S100A8, S100A9, SELE, SELL, SELP, SERPINE1, SOCS3, SPP1, THBS2, TLR4, TNFRSF1B, TNFSF13B	41			Hematological System Development and Function	chemotaxis	chemotaxis of leukocytes	7.86e-22	C5AR1, CCL4, CCL8, CCR1, CSF3R, CXCL5, CXCL6, CXCL10, CXCL11, CXCL14, FCGR2A, FPR1, FPR2, GNLY, IL8, IL1B, IL8RB, INHBA, PDE4B, RGS1, S100A8, S100A9, SELE, SOCS3, SPP1, THBS2	26
	Cellular Growth and Proliferation	proliferation	proliferation of cell lines	8.51e-11	CAV1, CAV2, CCL2, CSF2RB, CXCR7, ENTPD1, FLI1, FST, HGF, IGFBP5, IL6, IL11, IL13RA2, IL7R, INHBA, LOX, NR3C1, PAPPA, PLAT, PLAU, PTGS1, PTGS2, RUNX2, S100A9, SDC2, SERPINE1, SOCS3, TFPI2, VCAN, WNT5A	30			Cellular Movement	movement	movement of leukocytes	8.13e-26	C5AR1, CCL4, CCR1, CSF3R, CXCL5, CXCL6, CXCL11, CXCL14, FCER1G, FCGR2A, FGR, FPR1, FPR2, FYB, GNLY, HCK, HGF, ICAM1, IL6, IL8, IL1B, IL8RA, IL8RB, INHBA, ITGAM, ITGAX, LILRA6, PDE4B, PROK2, S100A8, S100A9, SELE, SELL, SELP, SERPINE1, SOCS3, SPP1, THBS2, TLR4, TNFRSF1B, TNFSF13B	41			Cellular Movement	chemotaxis	chemotaxis of blood cells	2.48e-21	C5AR1, CCL4, CCL8, CCR1, CSF3R, CXCL5, CXCL6, CXCL10, CXCL11, CXCL14, FCGR2A, FPR1, FPR2, GNLY, IL8, IL1B, IL8RB, INHBA, PDE4B, RGS1, S100A8, S100A9, SELE, SOCS3, SPP1, THBS2	26
	Cell-To-Cell Signaling and Interaction	activation	activation of cells	8.69e-11	CCL2, CCL4, CCL8, CD86, CXCL5, CXCL6, ENTPD1, FCER1G, FCGR2A, FYB, HGF, IL6, IL11, LCP2, LILRB1, LY96, PLAT, PLAU, PTGS2, SDC2, SELE, STC1, TNC, TNFRSF11B, VIM	25			Cellular Movement	cell movement	cell movement	8.79e-26	ALOX5AP, ANPEP, C5AR1, CCL4, CCR1, CD14, CSF3, CSF3R, CXCL5, CXCL6, CXCL11, CXCL14, DUSP1, FCER1G, FCGR2A, FGF2, FGR, FPR1, FPR2, GNLY, HCK, HGF, ICAM1, IL6, IL8, IL1A, IL1B, IL8RA, IL8RB, INHBA, ITGAM, ITGAX, LCP2, LILRA6, NRCAM, OSM, PDE4B, PREX1, PROK2, PTGES, PTGS2, PYY, S100A8, S100A9, SELE, SELL, SELP, SERPINE1, SFRP2, SOCS3, SPP1, THBS2, TLR2, TLR4, TNFAIP3, TNFRSF11B, TNFRSF1B, TWIST1, TY…	61			Immune Response	homing	homing of leukocytes	3.11e-21	C5AR1, CCL4, CCL8, CCR1, CSF3R, CXCL5, CXCL6, CXCL10, CXCL11, CXCL14, FCGR2A, FPR1, FPR2, GNLY, IL8, IL1B, IL8RB, INHBA, PDE4B, RGS1, S100A8, S100A9, SELE, SOCS3, SPP1, THBS2	26
	Cellular Movement	homing	homing of eukaryotic cells	1.19e-10	CAV1, CCL2, CCL4, CCL8, CD69, CXCL5, CXCL6, CXCR7, FCER1G, FCGR2A, HGF, IL6, INHBA, PDE4B, PLAU, PTGS2, ROBO1, S100A9, SELE, SOCS3	20			Cellular Movement	cell movement	cell movement of eukaryotic cells	3.02e-25	ALOX5AP, ANPEP, C5AR1, CCL4, CCR1, CD14, CSF3, CSF3R, CXCL5, CXCL6, CXCL11, CXCL14, DUSP1, FCER1G, FCGR2A, FGF2, FGR, FPR1, FPR2, GNLY, HCK, HGF, ICAM1, IL6, IL8, IL1A, IL1B, IL8RA, IL8RB, INHBA, ITGAM, ITGAX, LCP2, LILRA6, NRCAM, OSM, PDE4B, PREX1, PTGES, PTGS2, S100A8, S100A9, SELE, SELL, SELP, SERPINE1, SFRP2, SOCS3, SPP1, THBS2, TLR2, TLR4, TNFAIP3, TNFRSF11B, TNFRSF1B, WNT5A	56			Cellular Movement	homing	homing of leukocytes	3.11e-21	C5AR1, CCL4, CCL8, CCR1, CSF3R, CXCL5, CXCL6, CXCL10, CXCL11, CXCL14, FCGR2A, FPR1, FPR2, GNLY, IL8, IL1B, IL8RB, INHBA, PDE4B, RGS1, S100A8, S100A9, SELE, SOCS3, SPP1, THBS2	26
	Cellular Movement	chemotaxis	chemotaxis of cells	1.49e-10	CAV1, CCL2, CCL4, CCL8, CD69, CXCL5, CXCL6, CXCR7, FCER1G, FCGR2A, HGF, IL6, INHBA, PDE4B, PLAU, PTGS2, ROBO1, S100A9, SELE, SOCS3	20			Cellular Movement	migration	migration of blood cells	3.34e-25	C5AR1, CCL4, CCR1, CSF3R, CXCL5, CXCL6, CXCL11, CXCL14, FCER1G, FCGR2A, FGR, FPR1, FPR2, FYB, GNLY, HCK, HGF, ICAM1, IL6, IL8, IL1B, IL8RA, IL8RB, INHBA, ITGAM, ITGAX, LILRA6, PDE4B, PROK2, S100A8, S100A9, SELE, SELL, SELP, SERPINE1, SOCS3, SPP1, THBS2, TLR4, TNFRSF1B, TNFSF13B	41			Hematological System Development and Function	homing	homing of leukocytes	3.11e-21	C5AR1, CCL4, CCL8, CCR1, CSF3R, CXCL5, CXCL6, CXCL10, CXCL11, CXCL14, FCGR2A, FPR1, FPR2, GNLY, IL8, IL1B, IL8RB, INHBA, PDE4B, RGS1, S100A8, S100A9, SELE, SOCS3, SPP1, THBS2	26
	Cancer	malignant tumor	malignant tumor	1.82e-10	ANTXR1, C1S, CAV1, CD86, CDH11, COL12A1, CSF2RB, EDNRB, FLI1, HGF, IGFBP5, IL6, IL13RA2, INHBA, LOX, MIRN155 (includes EG:114614), MME, MMP3, MMP10, NNMT, NR3C1, PDPN, PLAT, PLAU, PTGS1, PTGS2, RGS5, RUNX2, S100A9, SDC2, SOCS3, TBC1D9, TFPI2, THBD, TNC, VCAN, VIM, WNT5A	38			Cellular Movement	movement	movement of blood cells	3.34e-25	C5AR1, CCL4, CCR1, CSF3R, CXCL5, CXCL6, CXCL11, CXCL14, FCER1G, FCGR2A, FGR, FPR1, FPR2, FYB, GNLY, HCK, HGF, ICAM1, IL6, IL8, IL1B, IL8RA, IL8RB, INHBA, ITGAM, ITGAX, LILRA6, PDE4B, PROK2, S100A8, S100A9, SELE, SELL, SELP, SERPINE1, SOCS3, SPP1, THBS2, TLR4, TNFRSF1B, TNFSF13B	41			Cellular Movement	cell movement	cell movement of eukaryotic cells	4.46e-21	C5AR1, CCL4, CCL8, CCR1, CD69, CSF3, CSF3R, CXCL5, CXCL6, CXCL10, CXCL11, CXCL14, FCGR2A, FGF2, FPR1, FPR2, GNLY, HGF, IL6, IL8, IL1A, IL1B, IL8RB, INHBA, LCP2, NRCAM, OSM, PDE4B, PTGS2, RGS1, S100A8, S100A9, SELE, SELL, SERPINE1, SOCS3, SPP1, THBS2, TLR2, TNFRSF11B, WNT5A	41
	Infectious Disease	infectious disorder	infectious disorder	1.88e-10	C1S, CALD1, CAV1, CCL2, CCL4, CCL8, CD86, CSF2RB, CXCL6, DDX58, IL6, IL7R, NR3C1, PDE4B, PLAT, PTGS1, PTGS2, S100A9, SERPINE1, SLC2A3, TFPI, THBD, TLR1	23			Cellular Movement	cell movement	cell movement of cells	8.02e-25	ALOX5AP, ANPEP, C5AR1, CCL4, CCR1, CD14, CSF3, CSF3R, CXCL5, CXCL6, CXCL11, CXCL14, DUSP1, FCER1G, FCGR2A, FGF2, FGR, FPR1, FPR2, GNLY, HCK, HGF, ICAM1, IL6, IL8, IL1A, IL1B, IL8RA, IL8RB, INHBA, ITGAM, ITGAX, LCP2, LILRA6, NRCAM, OSM, PDE4B, PREX1, PTGES, PTGS2, PYY, S100A8, S100A9, SELE, SELL, SELP, SERPINE1, SFRP2, SOCS3, SPP1, THBS2, TLR2, TLR4, TNFAIP3, TNFRSF11B, TNFRSF1B, TWIST1, VNN2, WNT…	59			Cellular Movement	homing	homing of blood cells	8.92e-21	C5AR1, CCL4, CCL8, CCR1, CSF3R, CXCL5, CXCL6, CXCL10, CXCL11, CXCL14, FCGR2A, FPR1, FPR2, GNLY, IL8, IL1B, IL8RB, INHBA, PDE4B, RGS1, S100A8, S100A9, SELE, SOCS3, SPP1, THBS2	26
	Cellular Movement	cell movement	cell movement of phagocytes	1.97e-10	CCL2, CCL4, CCL8, CXCL5, CXCL6, FCER1G, FCGR2A, HGF, IL6, INHBA, PDE4B, PLAT, PLAU, PTGS2, S100A9, SELE, SOCS3	17			Infectious Disease	infectious disorder	infectious disorder	1.07e-24	ACSL1, ANPEP, CCL4, CCR1, CD14, CLEC4E, CR1, CSF2RB, CSF3R, CXCL6, CXCL11, EGR1, F5, FPR1, HCK, HLA-DQB1, ICAM1, IL6, IL8, IL1B, IL1RN, IL7R, IL8RA, IL8RB, ITGAM, LILRA2, LILRA3, MNDA, NFE2, NFIL3, PDE4B, PTGS2, PTPRC, PTX3, RAB31, S100A9, S100A12, SERPINE1, SLC11A1, SLC2A3, SPP1, TFPI, TLR1, TLR2, TLR4, TLR8, TNFRSF1B, TREM1	48			Cellular Movement	cell movement	cell movement of phagocytes	1.42e-20	CCL4, CCL8, CSF3, CSF3R, CXCL5, CXCL6, CXCL10, CXCL14, FCGR2A, FPR1, FPR2, GNLY, HGF, IL6, IL8, IL1B, IL8RB, INHBA, PDE4B, PTGS2, S100A8, S100A9, SELE, SELL, SOCS3, SPP1, TLR2	27
	Hematological System Development and Function	cell movement	cell movement of phagocytes	1.97e-10	CCL2, CCL4, CCL8, CXCL5, CXCL6, FCER1G, FCGR2A, HGF, IL6, INHBA, PDE4B, PLAT, PLAU, PTGS2, S100A9, SELE, SOCS3	17			Cell-To-Cell Signaling and Interaction	binding	binding of cells	7.64e-24	CCL4, CCR1, CD14, CLEC7A, CR1, CXCL11, F5, FCGR1A, FCGR2A, FCGR3B, FGF2, FGR, FPR1, FYB, HCK, HGF, ICAM1, IGFBP5, IL6, IL8, IL18RAP, IL1A, IL1B, IL8RA, IL8RB, INHBA, ITGAM, ITGAX, LCP2, LY96, NFE2, OSM, PTPRC, PYY, RHOH, S100A9, SELE, SELL, SELP, SERPINE1, SPP1, THBS2, TLR4, TNC	44			Hematological System Development and Function	cell movement	cell movement of phagocytes	1.42e-20	CCL4, CCL8, CSF3, CSF3R, CXCL5, CXCL6, CXCL10, CXCL14, FCGR2A, FPR1, FPR2, GNLY, HGF, IL6, IL8, IL1B, IL8RB, INHBA, PDE4B, PTGS2, S100A8, S100A9, SELE, SELL, SOCS3, SPP1, TLR2	27
	Hematological Disease	hematological disorder	hematological disorder	2.01e-10	ABCA1, BCAT1, CALD1, CAV1, CCL2, CSF2RB, EDNRB, FCER1G, FCGR2A, FLI1, FYB, HGF, IL6, IL7R, INHBA, LCP2, NR3C1, PDE4B, PLAT, PLAU, PTGS1, PTGS2, S100A9, SELE, SERPINE1, SOCS3, TFPI, THBD	28			Cell-To-Cell Signaling and Interaction	binding	binding of eukaryotic cells	5.86e-23	CCL4, CCR1, CD14, CLEC7A, CR1, CXCL11, F5, FCGR1A, FCGR2A, FCGR3B, FGF2, FGR, FPR1, FYB, HCK, HGF, ICAM1, IGFBP5, IL6, IL8, IL1A, IL1B, IL8RA, IL8RB, INHBA, ITGAM, ITGAX, LCP2, NFE2, OSM, PTPRC, PYY, RHOH, S100A9, SELE, SELL, SELP, SERPINE1, SPP1, THBS2, TLR4, TNC	42			Immune Response	cell movement	cell movement of neutrophils	3.37e-20	CCL4, CSF3, CSF3R, CXCL5, CXCL6, CXCL10, CXCL14, FCGR2A, FPR1, FPR2, IL6, IL8, IL1B, IL8RB, PDE4B, PTGS2, S100A8, S100A9, SELE, SELL, SOCS3, SPP1, TLR2	23
	Cell-To-Cell Signaling and Interaction	adhesion	adhesion of cells	2.42e-10	CCL2, CCL4, CDH11, CLEC4A, DKK3, FCER1G, FCGR2A, FYB, HGF, IL6, IL11, MME, PDPN, PLAU, PSCDBP, ROBO1, S100A9, SDC2, SELE, SERPINE1, ST8SIA4, TFPI, THBD, TNC, TNFRSF11B, VCAN, ZEB1	27			Inflammatory Disease	polyarticular juvenile rheumatoid arthritis	polyarticular juvenile rheumatoid arthritis	1.28e-22	BCL6, CCL4, CCR1, CR1, FPR2, GADD45B, GNLY, IL1B, IL8RA, MME, NCF4, OSM, P2RY13, PTGS2, PTPRC, S100A8, S100A9, S100A12, TLR1, TNFAIP3, TNFRSF10C, TNFSF13B, ZFP36	23			Cellular Movement	cell movement	cell movement of neutrophils	3.37e-20	CCL4, CSF3, CSF3R, CXCL5, CXCL6, CXCL10, CXCL14, FCGR2A, FPR1, FPR2, IL6, IL8, IL1B, IL8RB, PDE4B, PTGS2, S100A8, S100A9, SELE, SELL, SOCS3, SPP1, TLR2	23
	Tissue Development	adhesion	adhesion of cells	2.42e-10	CCL2, CCL4, CDH11, CLEC4A, DKK3, FCER1G, FCGR2A, FYB, HGF, IL6, IL11, MME, PDPN, PLAU, PSCDBP, ROBO1, S100A9, SDC2, SELE, SERPINE1, ST8SIA4, TFPI, THBD, TNC, TNFRSF11B, VCAN, ZEB1	27			Connective Tissue Disorders	polyarticular juvenile rheumatoid arthritis	polyarticular juvenile rheumatoid arthritis	1.28e-22	BCL6, CCL4, CCR1, CR1, FPR2, GADD45B, GNLY, IL1B, IL8RA, MME, NCF4, OSM, P2RY13, PTGS2, PTPRC, S100A8, S100A9, S100A12, TLR1, TNFAIP3, TNFRSF10C, TNFSF13B, ZFP36	23			Hematological System Development and Function	cell movement	cell movement of neutrophils	3.37e-20	CCL4, CSF3, CSF3R, CXCL5, CXCL6, CXCL10, CXCL14, FCGR2A, FPR1, FPR2, IL6, IL8, IL1B, IL8RB, PDE4B, PTGS2, S100A8, S100A9, SELE, SELL, SOCS3, SPP1, TLR2	23
	Cellular Movement	chemotaxis	chemotaxis	4.19e-10	CAV1, CCL2, CCL4, CCL8, CD69, CXCL5, CXCL6, CXCR7, FCER1G, FCGR2A, HGF, IL6, INHBA, PDE4B, PLAU, PTGS2, ROBO1, S100A9, SELE, SOCS3	20			Skeletal and Muscular Disorders	polyarticular juvenile rheumatoid arthritis	polyarticular juvenile rheumatoid arthritis	1.28e-22	BCL6, CCL4, CCR1, CR1, FPR2, GADD45B, GNLY, IL1B, IL8RA, MME, NCF4, OSM, P2RY13, PTGS2, PTPRC, S100A8, S100A9, S100A12, TLR1, TNFAIP3, TNFRSF10C, TNFSF13B, ZFP36	23			Cellular Growth and Proliferation	proliferation	proliferation of eukaryotic cells	3.87e-20	AIM2, BCL6, BCL2A1, CCL4, CCR1, CLEC7A, COL8A1, CSF3, CSF3R, CXCL10, CYR61, DKK1, EREG, FGF2, FPR2, FST, GAS1, GBP1 (includes EG:2633), HGF, HSD11B1, IL6, IL8, IL11, IL24, IL13RA2, IL18RAP, IL1A, IL1B, IL7R, IL8RB, INDO, INHBA, LCP2, LILRB1, MMP3, NFE2, OSM, PAPPA, PROK2, PRRX1, PTGS2, PTPRC, PTX3, S100A8, S100A9, SERPINE1, SOCS3, SOD2, SPP1, STC1, TFPI, TFPI2, TLR2, TNC, TNFRSF11B, VCAN, WNT5A	57
	Cellular Movement	homing	homing of cells	4.19e-10	CAV1, CCL2, CCL4, CCL8, CD69, CXCL5, CXCL6, CXCR7, FCER1G, FCGR2A, HGF, IL6, INHBA, PDE4B, PLAU, PTGS2, ROBO1, S100A9, SELE, SOCS3	20			Immunological Disease	polyarticular juvenile rheumatoid arthritis	polyarticular juvenile rheumatoid arthritis	1.28e-22	BCL6, CCL4, CCR1, CR1, FPR2, GADD45B, GNLY, IL1B, IL8RA, MME, NCF4, OSM, P2RY13, PTGS2, PTPRC, S100A8, S100A9, S100A12, TLR1, TNFAIP3, TNFRSF10C, TNFSF13B, ZFP36	23			Immune Response	cell movement	cell movement of granulocytes	1.76e-19	CCL4, CCR1, CSF3, CSF3R, CXCL5, CXCL6, CXCL10, CXCL14, FCGR2A, FPR1, FPR2, IL6, IL8, IL1B, IL8RB, OSM, PDE4B, PTGS2, S100A8, S100A9, SELE, SELL, SOCS3, SPP1, TLR2	25
	Cell-To-Cell Signaling and Interaction	binding	binding of cells	4.32e-10	ABCA1, CAV1, CCL2, CCL4, CD86, ENTPD1, FCGR2A, FERMT2, FYB, HGF, IGFBP5, IL6, INHBA, LCP2, LY96, PLAU, S100A9, SDC2, SELE, SERPINE1, TNC	21			Hematological System Development and Function	activation	activation of blood cells	1.47e-22	C5AR1, CCL4, CD14, CD93, CLEC7A, CSF3, CXCL6, DOK3, FCER1G, FCGR2A, FPR1, FYB, GNLY, HCK, ICAM1, IL6, IL8, IL18RAP, IL1A, IL1B, IL1RN, IL8RB, ITGAM, LCP2, LILRA6, LILRB1, LY96, MMP1 (includes EG:4312), PTGES, PTGS2, PTPRC, SELE, SELL, SLC11A1, SPP1, TLR4, TLR8, TNC, TNFRSF1B, TNFSF13B, TREM1	41			Cellular Movement	cell movement	cell movement of granulocytes	1.76e-19	CCL4, CCR1, CSF3, CSF3R, CXCL5, CXCL6, CXCL10, CXCL14, FCGR2A, FPR1, FPR2, IL6, IL8, IL1B, IL8RB, OSM, PDE4B, PTGS2, S100A8, S100A9, SELE, SELL, SOCS3, SPP1, TLR2	25
	Cellular Movement	cell movement	cell movement of lymphatic system cells	4.4e-10	CCL2, CCL4, CCL8, CD86, CXCL5, CXCL6, CXCR7, FCER1G, FCGR2A, HGF, IL6, INHBA, LCP2, PDE4B, PLAT, PLAU, PTGS2, S100A9, SELE, SOCS3	20			Cell-To-Cell Signaling and Interaction	activation	activation of blood cells	1.47e-22	C5AR1, CCL4, CD14, CD93, CLEC7A, CSF3, CXCL6, DOK3, FCER1G, FCGR2A, FPR1, FYB, GNLY, HCK, ICAM1, IL6, IL8, IL18RAP, IL1A, IL1B, IL1RN, IL8RB, ITGAM, LCP2, LILRA6, LILRB1, LY96, MMP1 (includes EG:4312), PTGES, PTGS2, PTPRC, SELE, SELL, SLC11A1, SPP1, TLR4, TLR8, TNC, TNFRSF1B, TNFSF13B, TREM1	41			Hematological System Development and Function	cell movement	cell movement of granulocytes	1.76e-19	CCL4, CCR1, CSF3, CSF3R, CXCL5, CXCL6, CXCL10, CXCL14, FCGR2A, FPR1, FPR2, IL6, IL8, IL1B, IL8RB, OSM, PDE4B, PTGS2, S100A8, S100A9, SELE, SELL, SOCS3, SPP1, TLR2	25
	Cancer	apoptosis	apoptosis of prostate cancer cell lines	4.64e-10	CAV1, DKK3, FST, GLIPR1, HGF, IGFBP5, IL6, INHBA, MME, NR3C1, PLAU, PTGS2, TNFRSF11B	13			Cell-To-Cell Signaling and Interaction	activation	activation of lymphatic system cells	2.54e-22	C5AR1, CCL4, CD14, CD93, CLEC7A, CSF3, CXCL6, DOK3, FCER1G, FCGR1A, FCGR2A, FPR1, HCK, HLA-DQA1, ICAM1, IL6, IL8, IL18RAP, IL1A, IL1B, IL1RN, IL8RB, ITGAM, LILRA6, LILRB1, LY96, PTGES, PTGS2, PTPRC, SELE, SELL, SLC11A1, SPP1, TLR2, TLR4, TLR8, TNC, TNFRSF1B, TNFSF13B, TREM1	40			Cell-To-Cell Signaling and Interaction	activation	activation of eukaryotic cells	1.9e-19	BCL2A1, C5AR1, CCL4, CCL8, CLEC7A, CSF3, CXCL5, CXCL6, FCGR2A, FGF2, FPR1, GNLY, HGF, IL6, IL8, IL11, IL18RAP, IL1A, IL1B, IL1RN, IL8RB, LCP2, LILRB1, MMP1 (includes EG:4312), PTGS2, PTPRC, SELE, SELL, SLC11A1, SPP1, STC1, TLR2, TLR8, TNC, TNFRSF11B, TREM1	36
	Cell Death	apoptosis	apoptosis of prostate cancer cell lines	4.64e-10	CAV1, DKK3, FST, GLIPR1, HGF, IGFBP5, IL6, INHBA, MME, NR3C1, PLAU, PTGS2, TNFRSF11B	13			Hematological System Development and Function	activation	activation of phagocytes	4.53e-22	C5AR1, CCL4, CD14, CD93, CSF3, CXCL6, FPR1, HCK, ICAM1, IL6, IL8, IL18RAP, IL1A, IL1B, IL1RN, IL8RB, ITGAM, LY96, PTGES, PTGS2, SELE, SELL, SLC11A1, SPP1, TLR4, TREM1	26			Immune Response	cell movement	cell movement of myeloid cells	2.64e-19	CCL4, CCR1, CSF3, CSF3R, CXCL5, CXCL6, CXCL10, CXCL14, FCGR2A, FPR1, FPR2, IL6, IL8, IL1B, IL8RB, OSM, PDE4B, PTGS2, S100A8, S100A9, SELE, SELL, SOCS3, SPP1, TLR2	25
	Reproductive System Disease	apoptosis	apoptosis of prostate cancer cell lines	4.64e-10	CAV1, DKK3, FST, GLIPR1, HGF, IGFBP5, IL6, INHBA, MME, NR3C1, PLAU, PTGS2, TNFRSF11B	13			Cell-To-Cell Signaling and Interaction	activation	activation of phagocytes	4.53e-22	C5AR1, CCL4, CD14, CD93, CSF3, CXCL6, FPR1, HCK, ICAM1, IL6, IL8, IL18RAP, IL1A, IL1B, IL1RN, IL8RB, ITGAM, LY96, PTGES, PTGS2, SELE, SELL, SLC11A1, SPP1, TLR4, TREM1	26			Cellular Movement	cell movement	cell movement of myeloid cells	2.64e-19	CCL4, CCR1, CSF3, CSF3R, CXCL5, CXCL6, CXCL10, CXCL14, FCGR2A, FPR1, FPR2, IL6, IL8, IL1B, IL8RB, OSM, PDE4B, PTGS2, S100A8, S100A9, SELE, SELL, SOCS3, SPP1, TLR2	25
	Cancer	primary tumor	primary tumor	5.68e-10	ANTXR1, C1S, CAV1, CD86, CDH11, COL12A1, CSF2RB, EDNRB, FLI1, HGF, IGFBP5, IL6, IL13RA2, INHBA, LOX, MIRN155 (includes EG:114614), MME, MMP3, MMP10, NNMT, NR3C1, PDPN, PLAT, PLAU, PTGS1, PTGS2, RGS5, RUNX2, S100A9, SDC2, SOCS3, TBC1D9, TFPI2, THBD, TNC, VCAN, VIM, WNT5A	38			Cellular Movement	homing	homing of lymphatic system cells	8.96e-22	C5AR1, CCL4, CCR1, CSF3, CSF3R, CXCL5, CXCL6, CXCL11, CXCL14, FCER1G, FCGR2A, FGR, FPR1, FPR2, GNLY, HCK, IL8, IL1A, IL1B, IL8RA, IL8RB, INHBA, ITGAM, LILRA6, PDE4B, S100A8, S100A9, SELE, SOCS3, SPP1, THBS2, TLR4	32			Hematological System Development and Function	cell movement	cell movement of myeloid cells	2.64e-19	CCL4, CCR1, CSF3, CSF3R, CXCL5, CXCL6, CXCL10, CXCL14, FCGR2A, FPR1, FPR2, IL6, IL8, IL1B, IL8RB, OSM, PDE4B, PTGS2, S100A8, S100A9, SELE, SELL, SOCS3, SPP1, TLR2	25
	Cell-To-Cell Signaling and Interaction	binding	binding of eukaryotic cells	1.06e-09	ABCA1, CAV1, CCL2, CCL4, CD86, ENTPD1, FCGR2A, FERMT2, FYB, HGF, IGFBP5, IL6, INHBA, LCP2, PLAU, S100A9, SDC2, SELE, SERPINE1, TNC	20			Inflammatory Disease	juvenile rheumatoid arthritis	juvenile rheumatoid arthritis	9.78e-22	BCL6, CCL4, CCR1, CR1, FPR2, GADD45B, GNLY, IL1B, IL8RA, MME, NCF4, OSM, P2RY13, PTGS2, PTPRC, S100A8, S100A9, S100A12, TLR1, TNFAIP3, TNFRSF10C, TNFSF13B, ZFP36	23			Immune Response	cell movement	cell movement of bone marrow cells	3.97e-19	CCL4, CCR1, CSF3, CSF3R, CXCL5, CXCL6, CXCL10, CXCL14, FCGR2A, FPR1, FPR2, IL6, IL8, IL1B, IL8RB, OSM, PDE4B, PTGS2, S100A8, S100A9, SELE, SELL, SOCS3, SPP1, TLR2	25
	Cellular Movement	cell movement	cell movement of blood cells	1.24e-09	CCL2, CCL4, CCL8, CD86, CXCL5, CXCL6, CXCR7, FCER1G, FCGR2A, HGF, IL6, INHBA, PDE4B, PLAT, PLAU, PTGS2, S100A9, SELE, SOCS3, TNFRSF11B	20			Connective Tissue Disorders	juvenile rheumatoid arthritis	juvenile rheumatoid arthritis	9.78e-22	BCL6, CCL4, CCR1, CR1, FPR2, GADD45B, GNLY, IL1B, IL8RA, MME, NCF4, OSM, P2RY13, PTGS2, PTPRC, S100A8, S100A9, S100A12, TLR1, TNFAIP3, TNFRSF10C, TNFSF13B, ZFP36	23			Cellular Movement	cell movement	cell movement of bone marrow cells	3.97e-19	CCL4, CCR1, CSF3, CSF3R, CXCL5, CXCL6, CXCL10, CXCL14, FCGR2A, FPR1, FPR2, IL6, IL8, IL1B, IL8RB, OSM, PDE4B, PTGS2, S100A8, S100A9, SELE, SELL, SOCS3, SPP1, TLR2	25
	Cancer	cell death	cell death of prostate cancer cell lines	1.27e-09	CAV1, DKK3, FST, GLIPR1, HGF, IGFBP5, IL6, INHBA, MME, NR3C1, PLAU, PTGS2, TNFRSF11B	13			Skeletal and Muscular Disorders	juvenile rheumatoid arthritis	juvenile rheumatoid arthritis	9.78e-22	BCL6, CCL4, CCR1, CR1, FPR2, GADD45B, GNLY, IL1B, IL8RA, MME, NCF4, OSM, P2RY13, PTGS2, PTPRC, S100A8, S100A9, S100A12, TLR1, TNFAIP3, TNFRSF10C, TNFSF13B, ZFP36	23			Infectious Disease	infectious disorder	infectious disorder	3.97e-19	ACSL1, CCL4, CCL8, CCR1, CLEC4E, CSF3R, CXCL6, CXCL10, CXCL11, F5, FPR1, IL6, IL8, IL1B, IL1RN, IL7R, IL8RB, MNDA, NFE2, PDE4B, PTGS2, PTPRC, PTX3, S100A9, S100A12, SERPINE1, SLC11A1, SLC2A3, SPP1, TFPI, TLR1, TLR2, TLR8, TREM1	34
	Cell Death	cell death	cell death of prostate cancer cell lines	1.27e-09	CAV1, DKK3, FST, GLIPR1, HGF, IGFBP5, IL6, INHBA, MME, NR3C1, PLAU, PTGS2, TNFRSF11B	13			Immunological Disease	juvenile rheumatoid arthritis	juvenile rheumatoid arthritis	9.78e-22	BCL6, CCL4, CCR1, CR1, FPR2, GADD45B, GNLY, IL1B, IL8RA, MME, NCF4, OSM, P2RY13, PTGS2, PTPRC, S100A8, S100A9, S100A12, TLR1, TNFAIP3, TNFRSF10C, TNFSF13B, ZFP36	23			Cell-To-Cell Signaling and Interaction	activation	activation of cells	5.02e-19	BCL2A1, C5AR1, CCL4, CCL8, CLEC7A, CSF3, CXCL5, CXCL6, FCGR2A, FGF2, FPR1, GNLY, HGF, IL6, IL8, IL11, IL18RAP, IL1A, IL1B, IL1RN, IL8RB, LCP2, LILRB1, MMP1 (includes EG:4312), PTGS2, PTPRC, SELE, SELL, SLC11A1, SPP1, STC1, TLR2, TLR8, TNC, TNFRSF11B, TREM1	36
	Reproductive System Disease	cell death	cell death of prostate cancer cell lines	1.27e-09	CAV1, DKK3, FST, GLIPR1, HGF, IGFBP5, IL6, INHBA, MME, NR3C1, PLAU, PTGS2, TNFRSF11B	13			Cellular Movement	chemotaxis	chemotaxis of lymphatic system cells	1.42e-21	C5AR1, CCL4, CCR1, CSF3R, CXCL5, CXCL6, CXCL11, CXCL14, FCER1G, FCGR2A, FGR, FPR1, FPR2, GNLY, HCK, IL8, IL1A, IL1B, IL8RA, IL8RB, INHBA, ITGAM, LILRA6, PDE4B, S100A8, S100A9, SELE, SOCS3, SPP1, THBS2, TLR4	31			Tissue Morphology	quantity	quantity of cells	9.47e-19	BCL6, BCL2A1, C5AR1, CD69, CSF3, CSF3R, CXCL10, CYP26B1, FCGR2A, FGF2, FPR2, FST, HGF, HSD11B1, IL6, IL8, IL11, IL24, IL1A, IL1B, IL1RN, IL7R, IL8RB, INHBA, LCP2, MMP3, OSM, PDE4B, PROK2, PSCDBP, PTGS2, PTPRC, S100A8, S100A9, SELE, SELL, SOCS3, SOD2, SPP1, SRGN, STC1, THBS2, TLR2, TNC, TNFRSF11B	45
	Cellular Growth and Proliferation	formation	formation of eukaryotic cells	1.33e-09	CCL2, CDH11, FST, HGF, IL6, IL11, INHBA, LCP2, PAPPA, PTGS2, RUNX2, SDC2, SELE, SERPINE1, SOCS3, TNFRSF11B	16			Immune Response	activation	activation of leukocytes	1.64e-21	C5AR1, CCL4, CD14, CD93, CLEC7A, CSF3, CXCL6, DOK3, FCER1G, FCGR2A, FPR1, FYB, GNLY, ICAM1, IL6, IL8, IL18RAP, IL1A, IL1B, IL1RN, IL8RB, ITGAM, LCP2, LILRA6, LILRB1, LY96, PTPRC, SELE, SELL, SLC11A1, SPP1, TLR4, TLR8, TNC, TNFRSF1B, TNFSF13B, TREM1	37			Cell-To-Cell Signaling and Interaction	binding	binding of cells	3.33e-18	CCL4, CCR1, CLEC7A, CXCL10, CXCL11, CYR61, F5, FCGR2A, FCGR3B, FGF2, FPR1, HGF, IL6, IL8, IL18RAP, IL1A, IL1B, IL8RB, INHBA, LCP2, NFE2, OSM, PTPRC, PYY, S100A9, SELE, SELL, SERPINE1, SPP1, THBS2, TNC	31
	Cellular Movement	cell movement	cell movement of leukocytes	2.07e-09	CCL2, CCL4, CCL8, CD86, CXCL5, CXCL6, CXCR7, FCER1G, FCGR2A, IL6, INHBA, PDE4B, PLAT, PLAU, PTGS2, S100A9, SELE, SOCS3, TNFRSF11B	19			Hematological System Development and Function	activation	activation of leukocytes	1.64e-21	C5AR1, CCL4, CD14, CD93, CLEC7A, CSF3, CXCL6, DOK3, FCER1G, FCGR2A, FPR1, FYB, GNLY, ICAM1, IL6, IL8, IL18RAP, IL1A, IL1B, IL1RN, IL8RB, ITGAM, LCP2, LILRA6, LILRB1, LY96, PTPRC, SELE, SELL, SLC11A1, SPP1, TLR4, TLR8, TNC, TNFRSF1B, TNFSF13B, TREM1	37			Cellular Growth and Proliferation	proliferation	proliferation of cells	3.91e-18	AIM2, BCAT1, BCL6, BCL2A1, CCL4, CCR1, CLEC7A, COL8A1, CSF3, CSF3R, CXCL5, CXCL10, CYR61, DKK1, EREG, FGF2, FPR2, FST, GAS1, GBP1 (includes EG:2633), HGF, HSD11B1, IL6, IL8, IL11, IL24, IL13RA2, IL18RAP, IL1A, IL1B, IL7R, IL8RB, INDO, INHBA, LCP2, LILRB1, MMP3, NAMPT, NFE2, OSM, PAPPA, PROK2, PRRX1, PTGS2, PTPRC, PTX3, PYY, S100A8, S100A9, SERPINE1, SOCS3, SOD2, SPP1, STC1, TFPI, TFPI2, TLR2, TNC…	61
	Hematological System Development and Function	cell movement	cell movement of leukocytes	2.07e-09	CCL2, CCL4, CCL8, CD86, CXCL5, CXCL6, CXCR7, FCER1G, FCGR2A, IL6, INHBA, PDE4B, PLAT, PLAU, PTGS2, S100A9, SELE, SOCS3, TNFRSF11B	19			Cell-To-Cell Signaling and Interaction	activation	activation of leukocytes	1.64e-21	C5AR1, CCL4, CD14, CD93, CLEC7A, CSF3, CXCL6, DOK3, FCER1G, FCGR2A, FPR1, FYB, GNLY, ICAM1, IL6, IL8, IL18RAP, IL1A, IL1B, IL1RN, IL8RB, ITGAM, LCP2, LILRA6, LILRB1, LY96, PTPRC, SELE, SELL, SLC11A1, SPP1, TLR4, TLR8, TNC, TNFRSF1B, TNFSF13B, TREM1	37			Cell-To-Cell Signaling and Interaction	binding	binding of eukaryotic cells	6e-18	CCL4, CCR1, CLEC7A, CXCL10, CXCL11, CYR61, F5, FCGR2A, FCGR3B, FGF2, FPR1, HGF, IL6, IL8, IL1A, IL1B, IL8RB, INHBA, LCP2, NFE2, OSM, PTPRC, PYY, S100A9, SELE, SELL, SERPINE1, SPP1, THBS2, TNC	30
	Immune Response	cell movement	cell movement of leukocytes	2.07e-09	CCL2, CCL4, CCL8, CD86, CXCL5, CXCL6, CXCR7, FCER1G, FCGR2A, IL6, INHBA, PDE4B, PLAT, PLAU, PTGS2, S100A9, SELE, SOCS3, TNFRSF11B	19			Immune and Lymphatic System Development and Function	activation	activation of leukocytes	1.64e-21	C5AR1, CCL4, CD14, CD93, CLEC7A, CSF3, CXCL6, DOK3, FCER1G, FCGR2A, FPR1, FYB, GNLY, ICAM1, IL6, IL8, IL18RAP, IL1A, IL1B, IL1RN, IL8RB, ITGAM, LCP2, LILRA6, LILRB1, LY96, PTPRC, SELE, SELL, SLC11A1, SPP1, TLR4, TLR8, TNC, TNFRSF1B, TNFSF13B, TREM1	37			Cell-To-Cell Signaling and Interaction	adhesion	adhesion of cells	1.11e-17	CCL4, CCR1, CLEC7A, COL7A1, CSF3, CSF3R, CXCL10, CXCL11, CYR61, FCGR2A, FGF2, FPR2, HGF, IL6, IL8, IL11, IL1A, IL1B, IL8RB, MME, NRCAM, OSM, PSCDBP, PTPRC, RGS1, S100A8, S100A9, SELE, SELL, SERPINE1, SPP1, TFPI, THBS2, TNC, TNFAIP6, TNFRSF11B, TWIST1, VCAN	38
	Cellular Growth and Proliferation	formation	formation of cells	2.5e-09	CCL2, CDH11, FST, HGF, IL6, IL11, INHBA, LCP2, PAPPA, PTGS2, RUNX2, SDC2, SELE, SERPINE1, SOCS3, TNFRSF11B	16			Cellular Movement	migration	migration of neutrophils	2.22e-21	CCR1, CXCL5, CXCL6, FGR, FPR1, HCK, ICAM1, IL6, IL8, IL1B, IL8RB, ITGAM, ITGAX, PDE4B, S100A8, S100A9, SELE, SELL, SELP, SERPINE1, TLR4	21			Tissue Development	adhesion	adhesion of cells	1.11e-17	CCL4, CCR1, CLEC7A, COL7A1, CSF3, CSF3R, CXCL10, CXCL11, CYR61, FCGR2A, FGF2, FPR2, HGF, IL6, IL8, IL11, IL1A, IL1B, IL8RB, MME, NRCAM, OSM, PSCDBP, PTPRC, RGS1, S100A8, S100A9, SELE, SELL, SERPINE1, SPP1, TFPI, THBS2, TNC, TNFAIP6, TNFRSF11B, TWIST1, VCAN	38
	Cellular Growth and Proliferation	formation	formation of connective tissue cells	4.01e-09	CCL2, CDH11, FST, HGF, IL6, IL11, INHBA, PTGS2, SOCS3, TNFRSF11B	10			Cellular Movement	movement	movement of neutrophils	2.22e-21	CCR1, CXCL5, CXCL6, FGR, FPR1, HCK, ICAM1, IL6, IL8, IL1B, IL8RB, ITGAM, ITGAX, PDE4B, S100A8, S100A9, SELE, SELL, SELP, SERPINE1, TLR4	21			Immune Response	activation	activation of neutrophils	2.19e-17	C5AR1, CCL4, CSF3, CXCL6, FPR1, IL6, IL8, IL18RAP, IL1A, IL1B, IL1RN, IL8RB, SELE, SELL, SPP1	15
	Dermatological Diseases and Conditions	dermatological disorder	dermatological disorder	4.01e-09	CCL4, CD86, COL12A1, COL8A1, EDNRB, FCER1G, FCGR2A, HGF, IGHD, IL6, LCP2, LOX, MMP3, NR3C1, PDE4B, PLAU, PTGS1, PTGS2, SELE, SOCS3, TLR1, ZEB1	22			Cellular Movement	homing	homing of eukaryotic cells	2.83e-21	C5AR1, CCL4, CCR1, CSF3, CSF3R, CXCL5, CXCL6, CXCL11, CXCL14, FCER1G, FCGR2A, FGF2, FGR, FPR1, FPR2, GNLY, HCK, HGF, IL6, IL8, IL1A, IL1B, IL8RA, IL8RB, INHBA, ITGAM, LILRA6, PDE4B, PTGS2, S100A8, S100A9, SELE, SELP, SOCS3, SPP1, THBS2, TLR2, TLR4	38			Hematological System Development and Function	activation	activation of neutrophils	2.19e-17	C5AR1, CCL4, CSF3, CXCL6, FPR1, IL6, IL8, IL18RAP, IL1A, IL1B, IL1RN, IL8RB, SELE, SELL, SPP1	15
	Cell Death	cell death	cell death	4.95e-09	ACSL4, ANTXR1, CAV1, CCL4, CD69, CSF2RB, DKK3, EDNRB, EMP3, FCER1G, FLI1, FST, GLIPR1, GNG2, HGF, IGFBP5, IKIP, IL6, IL11, IL7R, INHBA, LILRB1, MME, MMP3, MMP10, NR3C1, PLAT, PLAU, PTGS1, PTGS2, QKI (includes EG:9444), RDX, RUNX2, S100A9, SDC2, SERPINE1, SLC2A3, SOCS3, SRGN, ST8SIA4, THBD, TNC, TNFRSF11B, VCAN, ZEB2	45			Immune Response	chemotaxis	chemotaxis of leukocytes	3.18e-21	C5AR1, CCL4, CCR1, CSF3R, CXCL5, CXCL6, CXCL11, CXCL14, FCER1G, FCGR2A, FGR, FPR1, FPR2, GNLY, HCK, IL8, IL1B, IL8RA, IL8RB, INHBA, ITGAM, LILRA6, PDE4B, S100A8, S100A9, SELE, SOCS3, SPP1, THBS2, TLR4	30			Cell-To-Cell Signaling and Interaction	activation	activation of neutrophils	2.19e-17	C5AR1, CCL4, CSF3, CXCL6, FPR1, IL6, IL8, IL18RAP, IL1A, IL1B, IL1RN, IL8RB, SELE, SELL, SPP1	15
	Hematological System Development and Function	hematological process	hematological process	6.24e-09	CAV1, CD69, CD86, CSF2RB, ENTPD1, FCER1G, FCGR2A, FLI1, FST, IL6, IL11, IL13RA2, IL7R, INHBA, LCP2, PLAT, PTGS2, RUNX2, SERPINE1, SOCS3, TFPI, THBD, TNFRSF11B	23			Cellular Movement	chemotaxis	chemotaxis of leukocytes	3.18e-21	C5AR1, CCL4, CCR1, CSF3R, CXCL5, CXCL6, CXCL11, CXCL14, FCER1G, FCGR2A, FGR, FPR1, FPR2, GNLY, HCK, IL8, IL1B, IL8RA, IL8RB, INHBA, ITGAM, LILRA6, PDE4B, S100A8, S100A9, SELE, SOCS3, SPP1, THBS2, TLR4	30			Immune and Lymphatic System Development and Function	activation	activation of neutrophils	2.19e-17	C5AR1, CCL4, CSF3, CXCL6, FPR1, IL6, IL8, IL18RAP, IL1A, IL1B, IL1RN, IL8RB, SELE, SELL, SPP1	15
	Cellular Movement	cell movement	cell movement of neutrophils	7.35e-09	CCL2, CCL4, CXCL5, CXCL6, FCER1G, FCGR2A, IL6, PDE4B, PLAT, PTGS2, S100A9, SELE, SOCS3	13			Hematological System Development and Function	chemotaxis	chemotaxis of leukocytes	3.18e-21	C5AR1, CCL4, CCR1, CSF3R, CXCL5, CXCL6, CXCL11, CXCL14, FCER1G, FCGR2A, FGR, FPR1, FPR2, GNLY, HCK, IL8, IL1B, IL8RA, IL8RB, INHBA, ITGAM, LILRA6, PDE4B, S100A8, S100A9, SELE, SOCS3, SPP1, THBS2, TLR4	30			Immune Response	activation	activation of myeloid cells	3.18e-17	C5AR1, CCL4, CSF3, CXCL6, FPR1, IL6, IL8, IL18RAP, IL1A, IL1B, IL1RN, IL8RB, SELE, SELL, SPP1, TREM1	16
	Hematological System Development and Function	cell movement	cell movement of neutrophils	7.35e-09	CCL2, CCL4, CXCL5, CXCL6, FCER1G, FCGR2A, IL6, PDE4B, PLAT, PTGS2, S100A9, SELE, SOCS3	13			Cellular Movement	migration	migration of bone marrow cells	4.78e-21	CCL4, CCR1, CSF3, CXCL5, CXCL6, CXCL11, FGR, FPR1, HCK, ICAM1, IL6, IL8, IL1B, IL8RB, ITGAM, ITGAX, PDE4B, S100A8, S100A9, SELE, SELL, SELP, SERPINE1, TLR4	24			Hematological System Development and Function	activation	activation of myeloid cells	3.18e-17	C5AR1, CCL4, CSF3, CXCL6, FPR1, IL6, IL8, IL18RAP, IL1A, IL1B, IL1RN, IL8RB, SELE, SELL, SPP1, TREM1	16
	Immune Response	cell movement	cell movement of neutrophils	7.35e-09	CCL2, CCL4, CXCL5, CXCL6, FCER1G, FCGR2A, IL6, PDE4B, PLAT, PTGS2, S100A9, SELE, SOCS3	13			Cellular Movement	movement	movement of bone marrow cells	4.78e-21	CCL4, CCR1, CSF3, CXCL5, CXCL6, CXCL11, FGR, FPR1, HCK, ICAM1, IL6, IL8, IL1B, IL8RB, ITGAM, ITGAX, PDE4B, S100A8, S100A9, SELE, SELL, SELP, SERPINE1, TLR4	24			Cell-To-Cell Signaling and Interaction	activation	activation of myeloid cells	3.18e-17	C5AR1, CCL4, CSF3, CXCL6, FPR1, IL6, IL8, IL18RAP, IL1A, IL1B, IL1RN, IL8RB, SELE, SELL, SPP1, TREM1	16
	Cell Death	apoptosis	apoptosis	8.87e-09	ACSL4, CAV1, CCL4, CD69, CSF2RB, DKK3, EDNRB, FCER1G, FLI1, FST, GLIPR1, GNG2, HGF, IGFBP5, IKIP, IL6, IL11, IL7R, INHBA, LILRB1, MME, MMP3, MMP10, NR3C1, PLAT, PLAU, PTGS1, PTGS2, QKI (includes EG:9444), RUNX2, S100A9, SDC2, SERPINE1, SLC2A3, SOCS3, SRGN, ST8SIA4, TNC, TNFRSF11B, VCAN, ZEB2	41			Cellular Movement	migration	migration of granulocytes	9.48e-21	CCL4, CCR1, CXCL5, CXCL6, CXCL11, FGR, FPR1, HCK, ICAM1, IL6, IL8, IL1B, IL8RB, ITGAM, ITGAX, PDE4B, S100A8, S100A9, SELE, SELL, SELP, SERPINE1, TLR4	23			Immune and Lymphatic System Development and Function	activation	activation of myeloid cells	3.18e-17	C5AR1, CCL4, CSF3, CXCL6, FPR1, IL6, IL8, IL18RAP, IL1A, IL1B, IL1RN, IL8RB, SELE, SELL, SPP1, TREM1	16
	Cellular Movement	chemotaxis	chemotaxis of leukocytes	9.09e-09	CCL2, CCL4, CCL8, CXCL5, CXCL6, CXCR7, FCER1G, FCGR2A, INHBA, PDE4B, PLAU, S100A9, SELE, SOCS3	14			Cellular Movement	movement	movement of granulocytes	9.48e-21	CCL4, CCR1, CXCL5, CXCL6, CXCL11, FGR, FPR1, HCK, ICAM1, IL6, IL8, IL1B, IL8RB, ITGAM, ITGAX, PDE4B, S100A8, S100A9, SELE, SELL, SELP, SERPINE1, TLR4	23			Hematological System Development and Function	activation	activation of phagocytes	3.6e-17	C5AR1, CCL4, CCL8, CSF3, CXCL6, FPR1, IL6, IL8, IL18RAP, IL1A, IL1B, IL1RN, IL8RB, PTGS2, SELE, SELL, SLC11A1, SPP1, TREM1	19
	Hematological System Development and Function	chemotaxis	chemotaxis of leukocytes	9.09e-09	CCL2, CCL4, CCL8, CXCL5, CXCL6, CXCR7, FCER1G, FCGR2A, INHBA, PDE4B, PLAU, S100A9, SELE, SOCS3	14			Cellular Movement	chemotaxis	chemotaxis of blood cells	1.1e-20	C5AR1, CCL4, CCR1, CSF3R, CXCL5, CXCL6, CXCL11, CXCL14, FCER1G, FCGR2A, FGR, FPR1, FPR2, GNLY, HCK, IL8, IL1B, IL8RA, IL8RB, INHBA, ITGAM, LILRA6, PDE4B, S100A8, S100A9, SELE, SOCS3, SPP1, THBS2, TLR4	30			Cell-To-Cell Signaling and Interaction	activation	activation of phagocytes	3.6e-17	C5AR1, CCL4, CCL8, CSF3, CXCL6, FPR1, IL6, IL8, IL18RAP, IL1A, IL1B, IL1RN, IL8RB, PTGS2, SELE, SELL, SLC11A1, SPP1, TREM1	19
	Immune Response	chemotaxis	chemotaxis of leukocytes	9.09e-09	CCL2, CCL4, CCL8, CXCL5, CXCL6, CXCR7, FCER1G, FCGR2A, INHBA, PDE4B, PLAU, S100A9, SELE, SOCS3	14			Cellular Movement	migration	migration of myeloid cells	1.16e-20	CCL4, CCR1, CXCL5, CXCL6, CXCL11, FGR, FPR1, HCK, ICAM1, IL6, IL8, IL1B, IL8RB, ITGAM, ITGAX, PDE4B, S100A8, S100A9, SELE, SELL, SELP, SERPINE1, TLR4	23			Cell-To-Cell Signaling and Interaction	adhesion	adhesion of eukaryotic cells	3.6e-17	CCL4, COL7A1, CSF3, CSF3R, CXCL10, CXCL11, CYR61, FCGR2A, FGF2, FPR2, HGF, IL6, IL8, IL11, IL1A, IL1B, IL8RB, OSM, PSCDBP, PTPRC, RGS1, S100A8, S100A9, SELE, SELL, SPP1, TFPI, THBS2, TNC, TNFRSF11B, VCAN	31
	Cancer	carcinoma	carcinoma	1.01e-08	ANTXR1, C1S, CAV1, CDH11, CSF2RB, EDNRB, HGF, IGFBP5, IL6, LOX, MIRN155 (includes EG:114614), MME, MMP3, MMP10, NNMT, NR3C1, PLAT, PLAU, PTGS1, PTGS2, RUNX2, S100A9, SOCS3, TBC1D9, TFPI2, THBD, TNC, VCAN, VIM, WNT5A	30			Cellular Movement	movement	movement of myeloid cells	1.16e-20	CCL4, CCR1, CXCL5, CXCL6, CXCL11, FGR, FPR1, HCK, ICAM1, IL6, IL8, IL1B, IL8RB, ITGAM, ITGAX, PDE4B, S100A8, S100A9, SELE, SELL, SELP, SERPINE1, TLR4	23			Tissue Development	adhesion	adhesion of eukaryotic cells	3.6e-17	CCL4, COL7A1, CSF3, CSF3R, CXCL10, CXCL11, CYR61, FCGR2A, FGF2, FPR2, HGF, IL6, IL8, IL11, IL1A, IL1B, IL8RB, OSM, PSCDBP, PTPRC, RGS1, S100A8, S100A9, SELE, SELL, SPP1, TFPI, THBS2, TNC, TNFRSF11B, VCAN	31
	Cancer	developmental process	developmental process of tumor cell lines	1.04e-08	CAV1, CSF2RB, CXCR7, DKK3, FCER1G, FLI1, FST, HGF, IGFBP5, IL6, IL11, INHBA, LOX, MIRN155 (includes EG:114614), NR3C1, PLAU, PTGS2, RUNX2, SDC2, SERPINE1, SOCS3, ST8SIA4, THBD, VCAN, WNT5A, ZEB2	26			Immune Response	homing	homing of leukocytes	1.39e-20	C5AR1, CCL4, CCR1, CSF3R, CXCL5, CXCL6, CXCL11, CXCL14, FCER1G, FCGR2A, FGR, FPR1, FPR2, GNLY, HCK, IL8, IL1B, IL8RA, IL8RB, INHBA, ITGAM, LILRA6, PDE4B, S100A8, S100A9, SELE, SOCS3, SPP1, THBS2, TLR4	30			Immune Response	activation	activation of bone marrow cells	6.11e-17	C5AR1, CCL4, CSF3, CXCL6, FPR1, IL6, IL8, IL18RAP, IL1A, IL1B, IL1RN, IL8RB, SELE, SELL, SPP1, TREM1	16
	Cell-To-Cell Signaling and Interaction	adhesion	adhesion of eukaryotic cells	1.18e-08	CCL2, CCL4, DKK3, FCER1G, FCGR2A, FYB, HGF, IL6, IL11, PLAU, PSCDBP, S100A9, SDC2, SELE, TFPI, THBD, TNC, TNFRSF11B, VCAN, ZEB1	20			Cellular Movement	homing	homing of leukocytes	1.39e-20	C5AR1, CCL4, CCR1, CSF3R, CXCL5, CXCL6, CXCL11, CXCL14, FCER1G, FCGR2A, FGR, FPR1, FPR2, GNLY, HCK, IL8, IL1B, IL8RA, IL8RB, INHBA, ITGAM, LILRA6, PDE4B, S100A8, S100A9, SELE, SOCS3, SPP1, THBS2, TLR4	30			Cellular Movement	migration	migration of bone marrow cells	6.11e-17	CCL4, CCR1, CSF3, CXCL5, CXCL6, CXCL10, CXCL11, FPR1, IL6, IL8, IL1B, IL8RB, PDE4B, S100A8, S100A9, SELE, SELL, SERPINE1	18
	Tissue Development	adhesion	adhesion of eukaryotic cells	1.18e-08	CCL2, CCL4, DKK3, FCER1G, FCGR2A, FYB, HGF, IL6, IL11, PLAU, PSCDBP, S100A9, SDC2, SELE, TFPI, THBD, TNC, TNFRSF11B, VCAN, ZEB1	20			Hematological System Development and Function	homing	homing of leukocytes	1.39e-20	C5AR1, CCL4, CCR1, CSF3R, CXCL5, CXCL6, CXCL11, CXCL14, FCER1G, FCGR2A, FGR, FPR1, FPR2, GNLY, HCK, IL8, IL1B, IL8RA, IL8RB, INHBA, ITGAM, LILRA6, PDE4B, S100A8, S100A9, SELE, SOCS3, SPP1, THBS2, TLR4	30			Cellular Movement	movement	movement of bone marrow cells	6.11e-17	CCL4, CCR1, CSF3, CXCL5, CXCL6, CXCL10, CXCL11, FPR1, IL6, IL8, IL1B, IL8RB, PDE4B, S100A8, S100A9, SELE, SELL, SERPINE1	18
	Cellular Movement	chemotaxis	chemotaxis of blood cells	1.54e-08	CCL2, CCL4, CCL8, CXCL5, CXCL6, CXCR7, FCER1G, FCGR2A, INHBA, PDE4B, PLAU, S100A9, SELE, SOCS3	14			Immune Response	infiltration	infiltration of neutrophils	2.1e-20	ALOX5AP, CCL4, CSF3, DUSP1, FCER1G, FPR2, ICAM1, IL6, IL8, IL1B, IL8RB, ITGAM, PTGS2, SELE, SELL, SELP, SOCS3, SPP1, TLR2, TLR4, TNFAIP3, TNFRSF1B	22			Cell-To-Cell Signaling and Interaction	activation	activation of bone marrow cells	6.11e-17	C5AR1, CCL4, CSF3, CXCL6, FPR1, IL6, IL8, IL18RAP, IL1A, IL1B, IL1RN, IL8RB, SELE, SELL, SPP1, TREM1	16
	Cellular Movement	homing	homing of leukocytes	1.73e-08	CCL2, CCL4, CCL8, CXCL5, CXCL6, CXCR7, FCER1G, FCGR2A, INHBA, PDE4B, PLAU, S100A9, SELE, SOCS3	14			Cellular Movement	infiltration	infiltration of neutrophils	2.1e-20	ALOX5AP, CCL4, CSF3, DUSP1, FCER1G, FPR2, ICAM1, IL6, IL8, IL1B, IL8RB, ITGAM, PTGS2, SELE, SELL, SELP, SOCS3, SPP1, TLR2, TLR4, TNFAIP3, TNFRSF1B	22			Immune and Lymphatic System Development and Function	activation	activation of bone marrow cells	6.11e-17	C5AR1, CCL4, CSF3, CXCL6, FPR1, IL6, IL8, IL18RAP, IL1A, IL1B, IL1RN, IL8RB, SELE, SELL, SPP1, TREM1	16
	Hematological System Development and Function	homing	homing of leukocytes	1.73e-08	CCL2, CCL4, CCL8, CXCL5, CXCL6, CXCR7, FCER1G, FCGR2A, INHBA, PDE4B, PLAU, S100A9, SELE, SOCS3	14			Hematological System Development and Function	infiltration	infiltration of neutrophils	2.1e-20	ALOX5AP, CCL4, CSF3, DUSP1, FCER1G, FPR2, ICAM1, IL6, IL8, IL1B, IL8RB, ITGAM, PTGS2, SELE, SELL, SELP, SOCS3, SPP1, TLR2, TLR4, TNFAIP3, TNFRSF1B	22			Hematological System Development and Function	adhesion	adhesion of leukocytes	7.12e-17	CCL4, CSF3R, CXCL11, FCGR2A, FPR2, HGF, IL6, IL8, IL11, IL1A, IL1B, IL8RB, OSM, PTPRC, RGS1, S100A8, S100A9, SELE, SELL, SPP1, THBS2, TNFRSF11B	22
	Immune Response	homing	homing of leukocytes	1.73e-08	CCL2, CCL4, CCL8, CXCL5, CXCL6, CXCR7, FCER1G, FCGR2A, INHBA, PDE4B, PLAU, S100A9, SELE, SOCS3	14			Cellular Movement	chemotaxis	chemotaxis of eukaryotic cells	2.74e-20	C5AR1, CCL4, CCR1, CSF3R, CXCL5, CXCL6, CXCL11, CXCL14, FCER1G, FCGR2A, FGF2, FGR, FPR1, FPR2, GNLY, HCK, HGF, IL6, IL8, IL1A, IL1B, IL8RA, IL8RB, INHBA, ITGAM, LILRA6, PDE4B, PTGS2, S100A8, S100A9, SELE, SOCS3, SPP1, THBS2, TLR2, TLR4	36			Cell-To-Cell Signaling and Interaction	adhesion	adhesion of leukocytes	7.12e-17	CCL4, CSF3R, CXCL11, FCGR2A, FPR2, HGF, IL6, IL8, IL11, IL1A, IL1B, IL8RB, OSM, PTPRC, RGS1, S100A8, S100A9, SELE, SELL, SPP1, THBS2, TNFRSF11B	22
	Cellular Movement	chemotaxis	chemotaxis of lymphatic system cells	1.8e-08	CCL2, CCL4, CCL8, CXCL5, CXCL6, CXCR7, FCER1G, FCGR2A, INHBA, PDE4B, PLAU, S100A9, SELE, SOCS3	14			Cellular Movement	homing	homing of cells	3.78e-20	C5AR1, CCL4, CCR1, CSF3, CSF3R, CXCL5, CXCL6, CXCL11, CXCL14, FCER1G, FCGR2A, FGF2, FGR, FPR1, FPR2, GNLY, HCK, HGF, IL6, IL8, IL1A, IL1B, IL8RA, IL8RB, INHBA, ITGAM, LILRA6, PDE4B, PTGS2, S100A8, S100A9, SELE, SELP, SOCS3, SPP1, THBS2, TLR2, TLR4	38			Immune and Lymphatic System Development and Function	adhesion	adhesion of leukocytes	7.12e-17	CCL4, CSF3R, CXCL11, FCGR2A, FPR2, HGF, IL6, IL8, IL11, IL1A, IL1B, IL8RB, OSM, PTPRC, RGS1, S100A8, S100A9, SELE, SELL, SPP1, THBS2, TNFRSF11B	22
	Inflammatory Disease	inflammatory disorder	inflammatory disorder of rodents	1.8e-08	CCL2, CD69, CD86, FCER1G, FCGR2A, HGF, IL6, IL13RA2, MME, MMP3, MMP10, PLAT, PLAU, PTGS2, SELE, SOCS3, TNFRSF11B	17			Cellular Movement	chemotaxis	chemotaxis	3.78e-20	C5AR1, CCL4, CCR1, CSF3R, CXCL5, CXCL6, CXCL11, CXCL14, FCER1G, FCGR2A, FGF2, FGR, FPR1, FPR2, GNLY, HCK, HGF, IL6, IL8, IL1A, IL1B, IL8RA, IL8RB, INHBA, ITGAM, LILRA6, PDE4B, PROK2, PTGS2, S100A8, S100A9, SELE, SOCS3, SPP1, THBS2, TLR2, TLR4, TYMP	38			Cellular Movement	chemotaxis	chemotaxis of phagocytes	1.14e-16	CCL4, CCL8, CSF3R, CXCL5, CXCL6, CXCL10, CXCL14, FCGR2A, FPR1, FPR2, GNLY, IL8, IL1B, IL8RB, INHBA, PDE4B, S100A8, S100A9, SELE	19
	Cellular Development	development	development of cells	1.84e-08	ANTXR1, CCL2, CCL4, CCL8, CD69, EDNRB, FCER1G, FCGR2A, FST, HGF, IL6, IL11, IL7R, INHBA, LCP2, LOX, NR3C1, PDPN, PLAT, PLAU, RDX, ROBO1, RUNX2, SOCS3, STC1, TNC, TNFRSF11B, VCAN, WIPF1	29			Hematological System Development and Function	adhesion	adhesion of leukocytes	3.78e-20	CCL4, CSF3R, CXCL11, FCGR2A, FGR, FPR2, FYB, HCK, HGF, ICAM1, IL6, IL8, IL11, IL1A, IL1B, IL8RB, ITGAM, ITGAX, OSM, PTPRC, S100A8, S100A9, SELE, SELL, SELP, SPP1, THBS2, TLR4, TNFRSF11B	29			Hematological System Development and Function	chemotaxis	chemotaxis of phagocytes	1.14e-16	CCL4, CCL8, CSF3R, CXCL5, CXCL6, CXCL10, CXCL14, FCGR2A, FPR1, FPR2, GNLY, IL8, IL1B, IL8RB, INHBA, PDE4B, S100A8, S100A9, SELE	19
	Inflammatory Disease	inflammatory disorder	inflammatory disorder of mammalia	2.1e-08	CCL2, CD69, CD86, FCER1G, FCGR2A, HGF, IL6, IL13RA2, MME, MMP3, MMP10, PLAT, PLAU, PTGS2, SELE, SOCS3, TNFRSF11B	17			Cell-To-Cell Signaling and Interaction	adhesion	adhesion of leukocytes	3.78e-20	CCL4, CSF3R, CXCL11, FCGR2A, FGR, FPR2, FYB, HCK, HGF, ICAM1, IL6, IL8, IL11, IL1A, IL1B, IL8RB, ITGAM, ITGAX, OSM, PTPRC, S100A8, S100A9, SELE, SELL, SELP, SPP1, THBS2, TLR4, TNFRSF11B	29			Cellular Movement	migration	migration of lymphatic system cells	1.15e-16	CCL4, CCR1, CD69, CSF3, CXCL5, CXCL6, CXCL10, CXCL11, FGF2, FPR1, HGF, IL6, IL8, IL1B, IL8RB, PDE4B, PROK2, PSCDBP, S100A8, S100A9, SELE, SELL, SERPINE1, SPP1	24
	Cellular Movement	migration	migration of lymphatic system cells	2.6e-08	CCL2, CCL4, CD69, CD86, CXCL5, CXCL6, FYB, HGF, IL6, PDE4B, PLAU, PSCDBP, S100A9, SELE, SERPINE1	15			Immune and Lymphatic System Development and Function	adhesion	adhesion of leukocytes	3.78e-20	CCL4, CSF3R, CXCL11, FCGR2A, FGR, FPR2, FYB, HCK, HGF, ICAM1, IL6, IL8, IL11, IL1A, IL1B, IL8RB, ITGAM, ITGAX, OSM, PTPRC, S100A8, S100A9, SELE, SELL, SELP, SPP1, THBS2, TLR4, TNFRSF11B	29			Cellular Movement	movement	movement of lymphatic system cells	1.15e-16	CCL4, CCR1, CD69, CSF3, CXCL5, CXCL6, CXCL10, CXCL11, FGF2, FPR1, HGF, IL6, IL8, IL1B, IL8RB, PDE4B, PROK2, PSCDBP, S100A8, S100A9, SELE, SELL, SERPINE1, SPP1	24
	Cellular Movement	movement	movement of lymphatic system cells	2.6e-08	CCL2, CCL4, CD69, CD86, CXCL5, CXCL6, FYB, HGF, IL6, PDE4B, PLAU, PSCDBP, S100A9, SELE, SERPINE1	15			Cellular Movement	homing	homing of blood cells	4.45e-20	C5AR1, CCL4, CCR1, CSF3R, CXCL5, CXCL6, CXCL11, CXCL14, FCER1G, FCGR2A, FGR, FPR1, FPR2, GNLY, HCK, IL8, IL1B, IL8RA, IL8RB, INHBA, ITGAM, LILRA6, PDE4B, S100A8, S100A9, SELE, SOCS3, SPP1, THBS2, TLR4	30			Cellular Movement	homing	homing of phagocytes	1.26e-16	CCL4, CCL8, CSF3R, CXCL5, CXCL6, CXCL10, CXCL14, FCGR2A, FPR1, FPR2, GNLY, IL8, IL1B, IL8RB, INHBA, PDE4B, S100A8, S100A9, SELE	19
	Cellular Movement	invasion	invasion of eukaryotic cells	2.6e-08	CAV1, CCL2, DKK3, FST, HGF, INHBA, LOX, MMP3, PAPPA, PLAT, PLAU, PTGS2, RUNX2, SDC2, TFPI2, VIM, WNT5A, ZEB2	18			Cancer	tumorigenesis	tumorigenesis	5.66e-20	AIM2, ALPL, ANPEP, BCL6, CASP4, CD14, CDX2, CHI3L1, CHRDL2, COL12A1, COL7A1, CSF2RB, CSF3R, CST7, CXCL14, DUSP1, EGR1, EREG, FGF2, FGR, FPR1, FRZB, FST, GADD45B, GAS1, GBP2, GPR65, HGF, HLA-DRB4, HOXD11, HSD11B1, ICAM1, IFI44L, IFIT3, IGFBP5, IL6, IL8, IL33, IL13RA2, IL1A, IL1B, IL1RN, IL7R, IL8RB, INDO, INHBA, KCNJ2, KIAA1199, KLK6, KLK10, MASP1, MME, MMP3, MMP1 (includes EG:4312), NR3C2, OSM, P…	92			Hematological System Development and Function	homing	homing of phagocytes	1.26e-16	CCL4, CCL8, CSF3R, CXCL5, CXCL6, CXCL10, CXCL14, FCGR2A, FPR1, FPR2, GNLY, IL8, IL1B, IL8RB, INHBA, PDE4B, S100A8, S100A9, SELE	19
	Cellular Growth and Proliferation	growth	growth of eukaryotic cells	2.6e-08	CAV1, CCL2, CCL4, CD86, CSF2RB, CXCR7, DKK3, FCER1G, FLI1, FST, HGF, IGFBP5, IL6, IL11, IL13RA2, IL7R, INHBA, LCP2, LOX, MIRN155 (includes EG:114614), NR3C1, PLAU, PTGS2, RUNX2, SDC2, SERPINE1, SOCS3, THBD, WNT5A	29			Cell-To-Cell Signaling and Interaction	adhesion	adhesion of blood cells	8.61e-20	CCL4, CR1, CSF3R, CXCL11, FCER1G, FCGR2A, FGR, FPR2, FYB, HCK, HGF, ICAM1, IL6, IL8, IL11, IL1A, IL1B, IL8RB, ITGAM, ITGAX, OSM, PTPRC, S100A8, S100A9, SELE, SELL, SELP, SPP1, THBS2, TLR4, TNFRSF11B	31			Hematological System Development and Function	activation	activation of blood cells	2.38e-16	C5AR1, CCL4, CCL8, CLEC7A, CSF3, CXCL6, FCGR2A, FPR1, GNLY, IL6, IL8, IL18RAP, IL1A, IL1B, IL1RN, IL8RB, LCP2, LILRB1, MMP1 (includes EG:4312), PTGS2, PTPRC, SELE, SELL, SLC11A1, SPP1, TLR8, TNC, TREM1	28
	Cancer	invasion	invasion of eukaryotic cells	2.6e-08	CAV1, CCL2, DKK3, FST, HGF, INHBA, LOX, MMP3, PAPPA, PLAT, PLAU, PTGS2, RUNX2, SDC2, TFPI2, VIM, WNT5A, ZEB2	18			Cellular Growth and Proliferation	proliferation	proliferation of eukaryotic cells	1.67e-19	AIM2, BCL6, BCL2A1, CCL4, CCR1, CD14, CLEC7A, COL8A1, CR1, CSF3, CSF2RB, CSF3R, EGR1, EREG, FGF2, FPR2, FST, FYB, GAS1, GBP1 (includes EG:2633), HCK, HGF, HSD11B1, ICAM1, IGFBP5, IL6, IL8, IL11, IL24, IL13RA2, IL18RAP, IL1A, IL1B, IL7R, IL8RA, IL8RB, INDO, INHBA, ITGAM, ITGAX, KLK6, LCP2, LILRB1, LY96, MMP3, NFE2, OSM, PAPPA, PDGFD, PROK2, PRRX1, PTGES, PTGS2, PTPRC, PTX3, RGS2, S100A8, S100A9, S…	73			Cell-To-Cell Signaling and Interaction	activation	activation of blood cells	2.38e-16	C5AR1, CCL4, CCL8, CLEC7A, CSF3, CXCL6, FCGR2A, FPR1, GNLY, IL6, IL8, IL18RAP, IL1A, IL1B, IL1RN, IL8RB, LCP2, LILRB1, MMP1 (includes EG:4312), PTGS2, PTPRC, SELE, SELL, SLC11A1, SPP1, TLR8, TNC, TREM1	28
	Cellular Movement	homing	homing of blood cells	2.66e-08	CCL2, CCL4, CCL8, CXCL5, CXCL6, CXCR7, FCER1G, FCGR2A, INHBA, PDE4B, PLAU, S100A9, SELE, SOCS3	14			Immune Response	infiltration	infiltration of granulocytes	1.97e-19	ALOX5AP, CCL4, CCR1, CSF3, DUSP1, FCER1G, FPR2, ICAM1, IL6, IL8, IL1B, IL8RB, ITGAM, OSM, PTGS2, SELE, SELL, SELP, SOCS3, SPP1, TLR2, TLR4, TNFAIP3, TNFRSF1B	24			Cellular Movement	migration	migration of granulocytes	2.53e-16	CCL4, CCR1, CXCL5, CXCL6, CXCL10, CXCL11, FPR1, IL6, IL8, IL1B, IL8RB, PDE4B, S100A8, S100A9, SELE, SELL, SERPINE1	17
	Immune Response	immune response	immune response	2.83e-08	CCL2, CCL4, CCL8, CD69, CD86, CXCL6, EBI2, FCER1G, FCGR2A, FYB, IGSF6, IL6, IL7R, INHBA, LCP2, LILRB1, LILRB2, LY96, PTGS2, SELE, TLR1, TNC, ZEB1	23			Cellular Movement	infiltration	infiltration of granulocytes	1.97e-19	ALOX5AP, CCL4, CCR1, CSF3, DUSP1, FCER1G, FPR2, ICAM1, IL6, IL8, IL1B, IL8RB, ITGAM, OSM, PTGS2, SELE, SELL, SELP, SOCS3, SPP1, TLR2, TLR4, TNFAIP3, TNFRSF1B	24			Cellular Movement	movement	movement of granulocytes	2.53e-16	CCL4, CCR1, CXCL5, CXCL6, CXCL10, CXCL11, FPR1, IL6, IL8, IL1B, IL8RB, PDE4B, S100A8, S100A9, SELE, SELL, SERPINE1	17
	Cellular Movement	migration	migration of cell lines	3.33e-08	CAV1, CCL2, CSF2RB, HGF, IGFBP5, IL6, IL11, LOX, MME, MMP3, PLAU, PTGS2, ROBO1, SDC2, SELE, SERPINE1, SOCS3, TNC, WNT5A	19			Hematological System Development and Function	infiltration	infiltration of granulocytes	1.97e-19	ALOX5AP, CCL4, CCR1, CSF3, DUSP1, FCER1G, FPR2, ICAM1, IL6, IL8, IL1B, IL8RB, ITGAM, OSM, PTGS2, SELE, SELL, SELP, SOCS3, SPP1, TLR2, TLR4, TNFAIP3, TNFRSF1B	24			Immune Response	activation	activation of leukocytes	2.7e-16	C5AR1, CCL4, CCL8, CLEC7A, CSF3, CXCL6, FCGR2A, FPR1, GNLY, IL6, IL8, IL18RAP, IL1A, IL1B, IL1RN, IL8RB, LCP2, LILRB1, PTPRC, SELE, SELL, SLC11A1, SPP1, TLR8, TNC, TREM1	26
	Cellular Movement	homing	homing of lymphatic system cells	3.88e-08	CCL2, CCL4, CCL8, CXCL5, CXCL6, CXCR7, FCER1G, FCGR2A, INHBA, PDE4B, PLAU, S100A9, SELE, SOCS3	14			Cellular Movement	infiltration	infiltration of phagocytes	2.37e-19	ALOX5AP, CCL4, CSF3, DUSP1, FCER1G, FPR2, HGF, ICAM1, IL6, IL8, IL1B, IL8RB, ITGAM, PTGES, PTGS2, SELE, SELL, SELP, SOCS3, SPP1, TLR2, TLR4, TNFAIP3, TNFRSF1B	24			Hematological System Development and Function	activation	activation of leukocytes	2.7e-16	C5AR1, CCL4, CCL8, CLEC7A, CSF3, CXCL6, FCGR2A, FPR1, GNLY, IL6, IL8, IL18RAP, IL1A, IL1B, IL1RN, IL8RB, LCP2, LILRB1, PTPRC, SELE, SELL, SLC11A1, SPP1, TLR8, TNC, TREM1	26
	Cellular Movement	movement	movement of cell lines	4.98e-08	CAV1, CCL2, CSF2RB, HGF, IGFBP5, IL6, IL11, LOX, MME, MMP3, PLAU, PTGS2, ROBO1, SDC2, SELE, SERPINE1, SOCS3, TNC, WNT5A	19			Hematological System Development and Function	infiltration	infiltration of phagocytes	2.37e-19	ALOX5AP, CCL4, CSF3, DUSP1, FCER1G, FPR2, HGF, ICAM1, IL6, IL8, IL1B, IL8RB, ITGAM, PTGES, PTGS2, SELE, SELL, SELP, SOCS3, SPP1, TLR2, TLR4, TNFAIP3, TNFRSF1B	24			Cell-To-Cell Signaling and Interaction	activation	activation of leukocytes	2.7e-16	C5AR1, CCL4, CCL8, CLEC7A, CSF3, CXCL6, FCGR2A, FPR1, GNLY, IL6, IL8, IL18RAP, IL1A, IL1B, IL1RN, IL8RB, LCP2, LILRB1, PTPRC, SELE, SELL, SLC11A1, SPP1, TLR8, TNC, TREM1	26
	Cellular Movement	invasion	invasion of cells	5.18e-08	CAV1, CCL2, DKK3, FST, HGF, INHBA, LOX, MMP3, PAPPA, PLAT, PLAU, PTGS2, RUNX2, SDC2, TFPI2, VIM, WNT5A, ZEB2	18			Tissue Morphology	quantity	quantity of cells	2.38e-19	BCL6, BCL2A1, C5AR1, CSF3, CSF2RB, CSF3R, CYP26B1, EGR1, FCER1G, FCGR1A, FCGR2A, FGF2, FPR2, FST, HBB (includes EG:3043), HGF, HLA-DQA1, HSD11B1, ICAM1, IGFBP5, IL6, IL8, IL11, IL24, IL1A, IL1B, IL1RN, IL7R, IL8RB, INHBA, ITGAM, LCP2, MMP3, NR3C2, OSM, PDE4B, PROK2, PTGES, PTGS2, PTPRC, RHOH, S100A8, S100A9, SELE, SELL, SELP, SOCS3, SOD2, SPP1, SRGN, STC1, THBS2, TLR2, TLR4, TNC, TNFRSF11B, TNFRS…	58			Immune and Lymphatic System Development and Function	activation	activation of leukocytes	2.7e-16	C5AR1, CCL4, CCL8, CLEC7A, CSF3, CXCL6, FCGR2A, FPR1, GNLY, IL6, IL8, IL18RAP, IL1A, IL1B, IL1RN, IL8RB, LCP2, LILRB1, PTPRC, SELE, SELL, SLC11A1, SPP1, TLR8, TNC, TREM1	26
	Cancer	invasion	invasion of cells	5.18e-08	CAV1, CCL2, DKK3, FST, HGF, INHBA, LOX, MMP3, PAPPA, PLAT, PLAU, PTGS2, RUNX2, SDC2, TFPI2, VIM, WNT5A, ZEB2	18			Cell-To-Cell Signaling and Interaction	binding	binding of blood cells	2.77e-19	CCL4, CCR1, CR1, CXCL11, F5, FCGR1A, FCGR2A, FCGR3B, FGF2, FGR, FPR1, FYB, HCK, HGF, ICAM1, IL8, IL1A, ITGAM, LCP2, NFE2, PTPRC, S100A9, SELE, SELL, SELP, TLR4, TNC	27			Cellular Movement	migration	migration of myeloid cells	2.91e-16	CCL4, CCR1, CXCL5, CXCL6, CXCL10, CXCL11, FPR1, IL6, IL8, IL1B, IL8RB, PDE4B, S100A8, S100A9, SELE, SELL, SERPINE1	17
	Immune Response	inflammatory response	inflammatory response	5.31e-08	CCL2, CCL4, CCL8, CXCL5, CXCL6, CXCR7, FCER1G, FCGR2A, IL6, INHBA, LY96, PDE4B, PLAU, PTGS1, PTGS2, S100A9, SELE, SOCS3	18			Hematological System Development and Function	quantity	quantity of blood cells	2.98e-19	BCL2A1, C5AR1, CSF3, CSF2RB, CSF3R, EGR1, FCER1G, FCGR1A, FCGR2A, FPR2, HBB (includes EG:3043), HGF, HLA-DQA1, ICAM1, IL6, IL8, IL11, IL1A, IL1B, IL7R, INHBA, ITGAM, LCP2, MMP3, OSM, PDE4B, PROK2, PTGES, PTPRC, RHOH, S100A8, S100A9, SELE, SELL, SELP, SOCS3, SPP1, THBS2, TLR2, TLR4, TNFRSF1B, TNFSF13B	42			Cellular Movement	movement	movement of myeloid cells	2.91e-16	CCL4, CCR1, CXCL5, CXCL6, CXCL10, CXCL11, FPR1, IL6, IL8, IL1B, IL8RB, PDE4B, S100A8, S100A9, SELE, SELL, SERPINE1	17
	Cellular Development	differentiation	differentiation of cells	6.92e-08	CCL2, CD86, CSF2RB, EDNRB, FCER1G, FLI1, FST, HGF, IGFBP5, IL6, IL11, IL13RA2, IL7R, INHBA, LCP2, MMP3, NID1, NR3C1, PLAU, PTGS2, QKI (includes EG:9444), RUNX2, S100A9, SOCS3, ST8SIA4, STC1, TNC, TNFRSF11B, VCAN, WNT5A, ZEB1	31			Tissue Morphology	quantity	quantity of blood cells	2.98e-19	BCL2A1, C5AR1, CSF3, CSF2RB, CSF3R, EGR1, FCER1G, FCGR1A, FCGR2A, FPR2, HBB (includes EG:3043), HGF, HLA-DQA1, ICAM1, IL6, IL8, IL11, IL1A, IL1B, IL7R, INHBA, ITGAM, LCP2, MMP3, OSM, PDE4B, PROK2, PTGES, PTPRC, RHOH, S100A8, S100A9, SELE, SELL, SELP, SOCS3, SPP1, THBS2, TLR2, TLR4, TNFRSF1B, TNFSF13B	42			Connective Tissue Disorders	polyarticular juvenile rheumatoid arthritis	polyarticular juvenile rheumatoid arthritis	3.13e-16	BCL6, CCL4, CCR1, CD69, FPR2, GNLY, IL1B, MME, OSM, PTGS2, PTPRC, S100A8, S100A9, S100A12, TLR1, TNFRSF10C	16
	Hematological System Development and Function	hematological process	hematological process of blood	7.89e-08	CAV1, ENTPD1, FCER1G, FCGR2A, IL6, LCP2, PLAT, SERPINE1, TFPI, THBD	10			Cellular Movement	chemotaxis	chemotaxis of cells	3e-19	C5AR1, CCL4, CCR1, CSF3R, CXCL5, CXCL6, CXCL11, CXCL14, FCER1G, FCGR2A, FGF2, FGR, FPR1, FPR2, GNLY, HCK, HGF, IL6, IL8, IL1A, IL1B, IL8RA, IL8RB, INHBA, ITGAM, LILRA6, PDE4B, PTGS2, S100A8, S100A9, SELE, SOCS3, SPP1, THBS2, TLR2, TLR4	36			Inflammatory Disease	polyarticular juvenile rheumatoid arthritis	polyarticular juvenile rheumatoid arthritis	3.13e-16	BCL6, CCL4, CCR1, CD69, FPR2, GNLY, IL1B, MME, OSM, PTGS2, PTPRC, S100A8, S100A9, S100A12, TLR1, TNFRSF10C	16
	Hematological System Development and Function	coagulation	coagulation of blood	7.89e-08	CAV1, ENTPD1, FCER1G, FCGR2A, IL6, LCP2, PLAT, SERPINE1, TFPI, THBD	10			Immune Response	infiltration	infiltration of myeloid cells	3.99e-19	ALOX5AP, CCL4, CCR1, CSF3, DUSP1, FCER1G, FPR2, ICAM1, IL6, IL8, IL1B, IL8RB, ITGAM, OSM, PTGS2, SELE, SELL, SELP, SOCS3, SPP1, TLR2, TLR4, TNFAIP3, TNFRSF1B	24			Skeletal and Muscular Disorders	polyarticular juvenile rheumatoid arthritis	polyarticular juvenile rheumatoid arthritis	3.13e-16	BCL6, CCL4, CCR1, CD69, FPR2, GNLY, IL1B, MME, OSM, PTGS2, PTPRC, S100A8, S100A9, S100A12, TLR1, TNFRSF10C	16
	Hematological System Development and Function	coagulation	coagulation of bodily fluid	9.52e-08	CAV1, ENTPD1, FCER1G, FCGR2A, IL6, LCP2, PLAT, SERPINE1, TFPI, THBD	10			Cellular Movement	infiltration	infiltration of myeloid cells	3.99e-19	ALOX5AP, CCL4, CCR1, CSF3, DUSP1, FCER1G, FPR2, ICAM1, IL6, IL8, IL1B, IL8RB, ITGAM, OSM, PTGS2, SELE, SELL, SELP, SOCS3, SPP1, TLR2, TLR4, TNFAIP3, TNFRSF1B	24			Immunological Disease	polyarticular juvenile rheumatoid arthritis	polyarticular juvenile rheumatoid arthritis	3.13e-16	BCL6, CCL4, CCR1, CD69, FPR2, GNLY, IL1B, MME, OSM, PTGS2, PTPRC, S100A8, S100A9, S100A12, TLR1, TNFRSF10C	16
	Organismal Functions	coagulation	coagulation of bodily fluid	9.52e-08	CAV1, ENTPD1, FCER1G, FCGR2A, IL6, LCP2, PLAT, SERPINE1, TFPI, THBD	10			Hematological System Development and Function	infiltration	infiltration of myeloid cells	3.99e-19	ALOX5AP, CCL4, CCR1, CSF3, DUSP1, FCER1G, FPR2, ICAM1, IL6, IL8, IL1B, IL8RB, ITGAM, OSM, PTGS2, SELE, SELL, SELP, SOCS3, SPP1, TLR2, TLR4, TNFAIP3, TNFRSF1B	24			Hematological System Development and Function	quantity	quantity of blood cells	3.35e-16	BCL2A1, C5AR1, CD69, CSF3, CSF3R, CXCL10, FCGR2A, FPR2, HGF, IL6, IL8, IL11, IL1A, IL1B, IL7R, INHBA, LCP2, MMP3, OSM, PDE4B, PROK2, PSCDBP, PTPRC, S100A8, S100A9, SELE, SELL, SOCS3, SPP1, THBS2, TLR2	31
	Cell Signaling	quantity	quantity of calcium	9.52e-08	CAV1, CCL2, CCL4, CCL8, EDNRB, ENTPD1, FCER1G, FCGR2A, HGF, IL6, LCP2, NR3C1, PLAU, S100A9, SELE, TNFRSF11B, WNT5A	17			Cellular Movement	migration	migration of lymphatic system cells	5.14e-19	CCL4, CCR1, CSF3, CXCL5, CXCL6, CXCL11, FGF2, FGR, FPR1, FYB, HCK, HGF, ICAM1, IL6, IL8, IL1B, IL8RB, ITGAM, ITGAX, PDE4B, PROK2, S100A8, S100A9, SELE, SELL, SELP, SERPINE1, SPP1, TLR4, TNFRSF1B, TNFSF13B	31			Hematological System Development and Function	quantity	quantity of leukocytes	3.35e-16	BCL2A1, C5AR1, CD69, CSF3, CSF3R, CXCL10, FCGR2A, FPR2, HGF, IL6, IL8, IL11, IL1A, IL1B, IL7R, INHBA, LCP2, MMP3, OSM, PDE4B, PROK2, PSCDBP, PTPRC, S100A8, S100A9, SELE, SELL, SOCS3, TLR2	29
	Molecular Transport	quantity	quantity of calcium	9.52e-08	CAV1, CCL2, CCL4, CCL8, EDNRB, ENTPD1, FCER1G, FCGR2A, HGF, IL6, LCP2, NR3C1, PLAU, S100A9, SELE, TNFRSF11B, WNT5A	17			Cellular Movement	movement	movement of lymphatic system cells	5.14e-19	CCL4, CCR1, CSF3, CXCL5, CXCL6, CXCL11, FGF2, FGR, FPR1, FYB, HCK, HGF, ICAM1, IL6, IL8, IL1B, IL8RB, ITGAM, ITGAX, PDE4B, PROK2, S100A8, S100A9, SELE, SELL, SELP, SERPINE1, SPP1, TLR4, TNFRSF1B, TNFSF13B	31			Cell-To-Cell Signaling and Interaction	adhesion	adhesion of blood cells	3.35e-16	CCL4, CSF3R, CXCL10, CXCL11, FCGR2A, FPR2, HGF, IL6, IL8, IL11, IL1A, IL1B, IL8RB, OSM, PTPRC, RGS1, S100A8, S100A9, SELE, SELL, SPP1, THBS2, TNFRSF11B	23
	Vitamin and Mineral Metabolism	quantity	quantity of calcium	9.52e-08	CAV1, CCL2, CCL4, CCL8, EDNRB, ENTPD1, FCER1G, FCGR2A, HGF, IL6, LCP2, NR3C1, PLAU, S100A9, SELE, TNFRSF11B, WNT5A	17			Cellular Movement	migration	migration of phagocytes	6.73e-19	CCR1, CXCL5, CXCL6, FGR, FPR1, HCK, HGF, ICAM1, IL6, IL8, IL1B, IL8RB, ITGAM, ITGAX, PDE4B, PROK2, S100A8, S100A9, SELE, SELL, SELP, SERPINE1, SPP1, TLR4	24			Tissue Morphology	quantity	quantity of blood cells	3.35e-16	BCL2A1, C5AR1, CD69, CSF3, CSF3R, CXCL10, FCGR2A, FPR2, HGF, IL6, IL8, IL11, IL1A, IL1B, IL7R, INHBA, LCP2, MMP3, OSM, PDE4B, PROK2, PSCDBP, PTPRC, S100A8, S100A9, SELE, SELL, SOCS3, SPP1, THBS2, TLR2	31
	Cellular Movement	chemotaxis	chemotaxis of phagocytes	1.13e-07	CCL2, CCL4, CCL8, CXCL5, CXCL6, FCER1G, FCGR2A, INHBA, PDE4B, S100A9, SELE	11			Cellular Movement	movement	movement of phagocytes	6.73e-19	CCR1, CXCL5, CXCL6, FGR, FPR1, HCK, HGF, ICAM1, IL6, IL8, IL1B, IL8RB, ITGAM, ITGAX, PDE4B, PROK2, S100A8, S100A9, SELE, SELL, SELP, SERPINE1, SPP1, TLR4	24			Tissue Morphology	quantity	quantity of leukocytes	3.35e-16	BCL2A1, C5AR1, CD69, CSF3, CSF3R, CXCL10, FCGR2A, FPR2, HGF, IL6, IL8, IL11, IL1A, IL1B, IL7R, INHBA, LCP2, MMP3, OSM, PDE4B, PROK2, PSCDBP, PTPRC, S100A8, S100A9, SELE, SELL, SOCS3, TLR2	29
	Hematological System Development and Function	chemotaxis	chemotaxis of phagocytes	1.13e-07	CCL2, CCL4, CCL8, CXCL5, CXCL6, FCER1G, FCGR2A, INHBA, PDE4B, S100A9, SELE	11			Cell-To-Cell Signaling and Interaction	adhesion	adhesion of cells	8.22e-19	C1ORF38, CCL4, CCR1, CD93, CLEC4A, CLEC7A, COL7A1, CR1, CSF3, CSF3R, CXCL11, EGR1, FCER1G, FCGR2A, FGF2, FGR, FPR2, FYB, HCK, HGF, ICAM1, IL6, IL8, IL11, IL1A, IL1B, IL8RB, ITGAM, ITGAX, KLK6, MME, NRCAM, OSM, PTPRC, S100A8, S100A9, SELE, SELL, SELP, SERPINB2, SERPINE1, SPP1, TFPI, THBS2, TLR4, TNC, TNFAIP6, TNFRSF11B, TWIST1	49			Immune and Lymphatic System Development and Function	quantity	quantity of leukocytes	3.35e-16	BCL2A1, C5AR1, CD69, CSF3, CSF3R, CXCL10, FCGR2A, FPR2, HGF, IL6, IL8, IL11, IL1A, IL1B, IL7R, INHBA, LCP2, MMP3, OSM, PDE4B, PROK2, PSCDBP, PTPRC, S100A8, S100A9, SELE, SELL, SOCS3, TLR2	29
	Hematological System Development and Function	coagulation	coagulation	1.13e-07	CAV1, ENTPD1, FCER1G, FCGR2A, IL6, LCP2, PLAT, SERPINE1, TFPI, THBD	10			Cancer	neoplasia	neoplasia	8.22e-19	AIM2, ALPL, ANPEP, BCL6, CASP4, CD14, CDX2, CHI3L1, CHRDL2, COL12A1, COL7A1, CSF2RB, CSF3R, CST7, CXCL14, DUSP1, EGR1, FGF2, FGR, FRZB, FST, GADD45B, GAS1, GBP2, GPR65, HGF, HLA-DRB4, HOXD11, HSD11B1, ICAM1, IFI44L, IFIT3, IGFBP5, IL6, IL8, IL13RA2, IL1A, IL1B, IL1RN, IL7R, IL8RB, INDO, INHBA, KCNJ2, KIAA1199, KLK6, KLK10, MASP1, MME, MMP3, MMP1 (includes EG:4312), NR3C2, PAPPA, PDE4B, PI15, PLCB…	86			Cell-To-Cell Signaling and Interaction	communication	communication of cells	3.36e-16	CCL4, CCL8, CCR1, CLEC7A, CXCL5, CXCL6, CXCL10, CXCL11, CXCL14, EREG, FGF2, IL6, IL1B, INHBA, LILRB2, MME, NAMPT, OSM, PYY, S100A9, STC1, TLR2, TNFAIP6, TREM1, WNT5A	25
	Cardiovascular Disease	cardiovascular disorder	cardiovascular disorder	1.14e-07	ABCA1, CAV1, CCL2, CCL4, CD86, CXCR7, EDNRB, IL6, LCP2, MMP3, NR3C1, PDE4B, PLAT, PLAU, PTGS1, PTGS2, RGS5, RUNX2, SELE, SERPINE1, TFPI, THBD, TNFRSF11B	23			Tissue Development	adhesion	adhesion of cells	8.22e-19	C1ORF38, CCL4, CCR1, CD93, CLEC4A, CLEC7A, COL7A1, CR1, CSF3, CSF3R, CXCL11, EGR1, FCER1G, FCGR2A, FGF2, FGR, FPR2, FYB, HCK, HGF, ICAM1, IL6, IL8, IL11, IL1A, IL1B, IL8RB, ITGAM, ITGAX, KLK6, MME, NRCAM, OSM, PTPRC, S100A8, S100A9, SELE, SELL, SELP, SERPINB2, SERPINE1, SPP1, TFPI, THBS2, TLR4, TNC, TNFAIP6, TNFRSF11B, TWIST1	49			Tissue Morphology	quantity	quantity of lymphatic system cells	3.76e-16	BCL2A1, C5AR1, CD69, CSF3, CSF3R, CXCL10, FCGR2A, FPR2, IL6, IL8, IL11, IL1A, IL1B, IL7R, INHBA, LCP2, MMP3, OSM, PDE4B, PROK2, PSCDBP, PTPRC, S100A8, S100A9, SELE, SELL, SOCS3, THBS2, TLR2, TNFRSF11B	30
	Cellular Movement	homing	homing of phagocytes	1.2e-07	CCL2, CCL4, CCL8, CXCL5, CXCL6, FCER1G, FCGR2A, INHBA, PDE4B, S100A9, SELE	11			Immune and Lymphatic System Development and Function	quantity	quantity of lymphatic system cells	1.01e-18	BCL2A1, C5AR1, CSF3, CSF2RB, CSF3R, EGR1, FCER1G, FCGR1A, FCGR2A, FPR2, HLA-DQA1, ICAM1, IL6, IL8, IL11, IL1A, IL1B, IL7R, INHBA, ITGAM, LCP2, MMP3, OSM, PDE4B, PROK2, PTGES, PTPRC, RHOH, S100A8, S100A9, SELE, SELL, SELP, SOCS3, THBS2, TLR2, TLR4, TNFRSF11B, TNFRSF1B, TNFSF13B	40			Immune and Lymphatic System Development and Function	quantity	quantity of lymphatic system cells	3.76e-16	BCL2A1, C5AR1, CD69, CSF3, CSF3R, CXCL10, FCGR2A, FPR2, IL6, IL8, IL11, IL1A, IL1B, IL7R, INHBA, LCP2, MMP3, OSM, PDE4B, PROK2, PSCDBP, PTPRC, S100A8, S100A9, SELE, SELL, SOCS3, THBS2, TLR2, TNFRSF11B	30
	Hematological System Development and Function	homing	homing of phagocytes	1.2e-07	CCL2, CCL4, CCL8, CXCL5, CXCL6, FCER1G, FCGR2A, INHBA, PDE4B, S100A9, SELE	11			Tissue Morphology	quantity	quantity of lymphatic system cells	1.01e-18	BCL2A1, C5AR1, CSF3, CSF2RB, CSF3R, EGR1, FCER1G, FCGR1A, FCGR2A, FPR2, HLA-DQA1, ICAM1, IL6, IL8, IL11, IL1A, IL1B, IL7R, INHBA, ITGAM, LCP2, MMP3, OSM, PDE4B, PROK2, PTGES, PTPRC, RHOH, S100A8, S100A9, SELE, SELL, SELP, SOCS3, THBS2, TLR2, TLR4, TNFRSF11B, TNFRSF1B, TNFSF13B	40			Immune Response	activation	activation of granulocytes	5.44e-16	C5AR1, CCL4, CSF3, CXCL6, FPR1, IL6, IL8, IL18RAP, IL1A, IL1B, IL1RN, IL8RB, SELE, SELL, SPP1	15
	Cellular Growth and Proliferation	formation	formation of osteocytes	1.64e-07	CCL2, FST, IL6, IL11, INHBA, PTGS2, SOCS3, TNFRSF11B	8			Reproductive System Disease	endometriosis	endometriosis	1.02e-18	BCAT1, BCL6, CCR1, DUSP1, EGR1, FGF2, FPR2, G0S2, ICAM1, IL6, IL8, INHBA, KIAA1199, MMP3, MMP1 (includes EG:4312), NFIL3, OLFM1, PDGFD, PFKFB3, PLCB4, PTGS2, S100A8, S100A9, SLC2A3, SPP1, STC1, TNFRSF1B, TNFSF13B, ZFP36	29			Hematological System Development and Function	activation	activation of granulocytes	5.44e-16	C5AR1, CCL4, CSF3, CXCL6, FPR1, IL6, IL8, IL18RAP, IL1A, IL1B, IL1RN, IL8RB, SELE, SELL, SPP1	15
	Hematological System Development and Function	activation	activation of blood cells	1.64e-07	CCL2, CCL4, CCL8, CD86, CXCL6, ENTPD1, FCER1G, FCGR2A, FYB, IL6, LCP2, LILRB1, LY96, PLAT, PTGS2, SELE, TNC	17			Immune Response	chemotaxis	chemotaxis of neutrophils	1.28e-18	CCL4, CSF3R, CXCL5, CXCL6, CXCL14, FCER1G, FCGR2A, FGR, FPR1, HCK, IL8, IL1B, IL8RA, IL8RB, ITGAM, LILRA6, PDE4B, S100A8, S100A9, SELE	20			Cell-To-Cell Signaling and Interaction	activation	activation of granulocytes	5.44e-16	C5AR1, CCL4, CSF3, CXCL6, FPR1, IL6, IL8, IL18RAP, IL1A, IL1B, IL1RN, IL8RB, SELE, SELL, SPP1	15
	Cell-To-Cell Signaling and Interaction	activation	activation of blood cells	1.64e-07	CCL2, CCL4, CCL8, CD86, CXCL6, ENTPD1, FCER1G, FCGR2A, FYB, IL6, LCP2, LILRB1, LY96, PLAT, PTGS2, SELE, TNC	17			Cellular Movement	chemotaxis	chemotaxis of neutrophils	1.28e-18	CCL4, CSF3R, CXCL5, CXCL6, CXCL14, FCER1G, FCGR2A, FGR, FPR1, HCK, IL8, IL1B, IL8RA, IL8RB, ITGAM, LILRA6, PDE4B, S100A8, S100A9, SELE	20			Immune and Lymphatic System Development and Function	activation	activation of granulocytes	5.44e-16	C5AR1, CCL4, CSF3, CXCL6, FPR1, IL6, IL8, IL18RAP, IL1A, IL1B, IL1RN, IL8RB, SELE, SELL, SPP1	15
	Cell-To-Cell Signaling and Interaction	binding	binding of cell lines	2.04e-07	ABCA1, CAV1, FCGR2A, FERMT2, FYB, HGF, IGFBP5, IL6, INHBA, PLAU, SDC2, SELE, SERPINE1, TNC	14			Hematological System Development and Function	chemotaxis	chemotaxis of neutrophils	1.28e-18	CCL4, CSF3R, CXCL5, CXCL6, CXCL14, FCER1G, FCGR2A, FGR, FPR1, HCK, IL8, IL1B, IL8RA, IL8RB, ITGAM, LILRA6, PDE4B, S100A8, S100A9, SELE	20			Cancer	tumorigenesis	tumorigenesis	6.8e-16	AIM2, BCL6, CHI3L1, COL12A1, COL7A1, CSF3R, CXCL10, CXCL14, CYR61, DKK1, EREG, FGF2, FPR1, FST, GAS1, HGF, HSD11B1, IFI44L, IFIT3, IL6, IL8, IL33, IL13RA2, IL1A, IL1B, IL1RN, IL7R, IL8RB, INDO, INHBA, KIAA1199, KLK10, MASP1, MME, MMP3, MMP10, MMP1 (includes EG:4312), OSM, PAPPA, PDE4B, PI15, PRRX1, PSCDBP, PTGS2, PTPRC, PTX3, S100A8, S100A9, SERPINE1, SLC2A3, SOCS3, SOD2, SPP1, TFPI, TFPI2, THBS2…	63
	Cellular Movement	cell movement	cell movement of tumor cell lines	2.32e-07	CCL2, CCL4, CCL8, CD69, CXCL5, DKK3, FERMT2, HGF, IL6, PLAU, SELE, SERPINE1, WNT5A	13			Immune Response	homing	homing of neutrophils	1.66e-18	CCL4, CSF3R, CXCL5, CXCL6, CXCL14, FCER1G, FCGR2A, FGR, FPR1, HCK, IL8, IL1B, IL8RA, IL8RB, ITGAM, LILRA6, PDE4B, S100A8, S100A9, SELE	20			Cellular Movement	cell movement	cell movement of cell lines	9.37e-16	CCL4, CCL8, CCR1, CD69, CXCL5, CXCL10, CXCL11, CXCL14, FGF2, FPR1, FPR2, HGF, IL6, IL8, IL8RB, NRCAM, OSM, PTGS2, RGS1, SELE, SELL, SERPINE1, SPP1, TLR2, WNT5A	25
	Cancer	cell movement	cell movement of tumor cell lines	2.32e-07	CCL2, CCL4, CCL8, CD69, CXCL5, DKK3, FERMT2, HGF, IL6, PLAU, SELE, SERPINE1, WNT5A	13			Cellular Movement	homing	homing of neutrophils	1.66e-18	CCL4, CSF3R, CXCL5, CXCL6, CXCL14, FCER1G, FCGR2A, FGR, FPR1, HCK, IL8, IL1B, IL8RA, IL8RB, ITGAM, LILRA6, PDE4B, S100A8, S100A9, SELE	20			Connective Tissue Disorders	juvenile rheumatoid arthritis	juvenile rheumatoid arthritis	1.14e-15	BCL6, CCL4, CCR1, CD69, FPR2, GNLY, IL1B, MME, OSM, PTGS2, PTPRC, S100A8, S100A9, S100A12, TLR1, TNFRSF10C	16
	Cellular Movement	cell movement	cell movement of granulocytes	2.4e-07	CCL2, CCL4, CXCL5, CXCL6, FCER1G, FCGR2A, IL6, PDE4B, PLAT, PTGS2, S100A9, SELE, SOCS3	13			Hematological System Development and Function	homing	homing of neutrophils	1.66e-18	CCL4, CSF3R, CXCL5, CXCL6, CXCL14, FCER1G, FCGR2A, FGR, FPR1, HCK, IL8, IL1B, IL8RA, IL8RB, ITGAM, LILRA6, PDE4B, S100A8, S100A9, SELE	20			Inflammatory Disease	juvenile rheumatoid arthritis	juvenile rheumatoid arthritis	1.14e-15	BCL6, CCL4, CCR1, CD69, FPR2, GNLY, IL1B, MME, OSM, PTGS2, PTPRC, S100A8, S100A9, S100A12, TLR1, TNFRSF10C	16
	Cellular Movement	chemotaxis	chemotaxis of neutrophils	2.4e-07	CCL2, CCL4, CXCL5, CXCL6, FCER1G, FCGR2A, PDE4B, S100A9, SELE	9			Cancer	cancer	cancer	1.97e-18	AIM2, ALPL, ANPEP, BCL6, CASP4, CD14, CDX2, CHI3L1, CHRDL2, COL12A1, COL7A1, CSF2RB, CSF3R, CST7, CXCL14, DUSP1, EGR1, FGF2, FGR, FRZB, FST, GADD45B, GAS1, GBP2, GPR65, HGF, HLA-DRB4, HOXD11, HSD11B1, ICAM1, IFI44L, IFIT3, IGFBP5, IL6, IL8, IL13RA2, IL1A, IL1B, IL1RN, IL7R, IL8RB, INDO, INHBA, KCNJ2, KIAA1199, KLK6, KLK10, MASP1, MME, MMP3, MMP1 (includes EG:4312), PAPPA, PDE4B, PI15, PLCB4, PRRX…	83			Skeletal and Muscular Disorders	juvenile rheumatoid arthritis	juvenile rheumatoid arthritis	1.14e-15	BCL6, CCL4, CCR1, CD69, FPR2, GNLY, IL1B, MME, OSM, PTGS2, PTPRC, S100A8, S100A9, S100A12, TLR1, TNFRSF10C	16
	Hematological System Development and Function	cell movement	cell movement of granulocytes	2.4e-07	CCL2, CCL4, CXCL5, CXCL6, FCER1G, FCGR2A, IL6, PDE4B, PLAT, PTGS2, S100A9, SELE, SOCS3	13			Cell-To-Cell Signaling and Interaction	adhesion	adhesion of lymphatic system cells	2.98e-18	CCL4, CSF3R, CXCL11, FGR, FPR2, FYB, HCK, HGF, ICAM1, IL6, IL8, IL11, IL1A, IL1B, IL8RB, ITGAM, ITGAX, OSM, S100A8, S100A9, SELE, SELL, SELP, SPP1, THBS2, TLR4	26			Immunological Disease	juvenile rheumatoid arthritis	juvenile rheumatoid arthritis	1.14e-15	BCL6, CCL4, CCR1, CD69, FPR2, GNLY, IL1B, MME, OSM, PTGS2, PTPRC, S100A8, S100A9, S100A12, TLR1, TNFRSF10C	16
	Hematological System Development and Function	chemotaxis	chemotaxis of neutrophils	2.4e-07	CCL2, CCL4, CXCL5, CXCL6, FCER1G, FCGR2A, PDE4B, S100A9, SELE	9			Cellular Development	differentiation	differentiation of cells	3.88e-18	BCL6, CCR1, CD14, CDX2, CHRDL2, CSF3, CSF2RB, CSF3R, CYP26B1, DUSP1, EGR1, EREG, FCER1G, FGF2, FST, GADD45B, GAS1, HGF, HLA-DQA1, HSD11B1, ICAM1, IGFBP5, IL6, IL8, IL11, IL13RA2, IL1A, IL1B, IL1RN, IL7R, INHBA, ITGAM, LCP2, LILRA6, MMP3, MMP1 (includes EG:4312), NFE2, NR3C2, OSM, PTGS2, PTPRC, RGS2, RHOH, S100A8, S100A9, SERPINB2, SFRP2, SOCS3, SOSTDC1, SPP1, STC1, THBS2, TLR2, TLR4, TNC, TNFRSF1…	63			Cell-To-Cell Signaling and Interaction	signaling	signaling of cells	1.14e-15	CCL4, CCL8, CCR1, CLEC7A, CXCL5, CXCL6, CXCL10, CXCL11, CXCL14, EREG, IL6, IL1B, INHBA, LILRB2, MME, NAMPT, OSM, PYY, S100A9, STC1, TLR2, TNFAIP6, TREM1, WNT5A	24
	Immune Response	cell movement	cell movement of granulocytes	2.4e-07	CCL2, CCL4, CXCL5, CXCL6, FCER1G, FCGR2A, IL6, PDE4B, PLAT, PTGS2, S100A9, SELE, SOCS3	13			Cell-To-Cell Signaling and Interaction	adhesion	adhesion of eukaryotic cells	4.7e-18	CCL4, COL7A1, CR1, CSF3, CSF3R, CXCL11, EGR1, FCER1G, FCGR2A, FGF2, FGR, FPR2, FYB, HCK, HGF, ICAM1, IL6, IL8, IL11, IL1A, IL1B, IL8RB, ITGAM, ITGAX, KLK6, OSM, PTPRC, S100A8, S100A9, SELE, SELL, SELP, SERPINB2, SPP1, TFPI, THBS2, TLR4, TNC, TNFRSF11B	39			Cell-To-Cell Signaling and Interaction	activation	activation of lymphatic system cells	6.94e-15	C5AR1, CCL4, CCL8, CLEC7A, CSF3, CXCL6, FCGR2A, FPR1, IL6, IL8, IL18RAP, IL1A, IL1B, IL1RN, IL8RB, LILRB1, PTGS2, PTPRC, SELE, SELL, SLC11A1, SPP1, TLR2, TLR8, TNC, TREM1	26
	Immune Response	chemotaxis	chemotaxis of neutrophils	2.4e-07	CCL2, CCL4, CXCL5, CXCL6, FCER1G, FCGR2A, PDE4B, S100A9, SELE	9			Tissue Development	adhesion	adhesion of eukaryotic cells	4.7e-18	CCL4, COL7A1, CR1, CSF3, CSF3R, CXCL11, EGR1, FCER1G, FCGR2A, FGF2, FGR, FPR2, FYB, HCK, HGF, ICAM1, IL6, IL8, IL11, IL1A, IL1B, IL8RB, ITGAM, ITGAX, KLK6, OSM, PTPRC, S100A8, S100A9, SELE, SELL, SELP, SERPINB2, SPP1, TFPI, THBS2, TLR4, TNC, TNFRSF11B	39			Immune Response	chemotaxis	chemotaxis of neutrophils	7.23e-15	CCL4, CSF3R, CXCL5, CXCL6, CXCL10, CXCL14, FCGR2A, FPR1, IL8, IL1B, IL8RB, PDE4B, S100A8, S100A9, SELE	15
	Cell Death	cell death	cell death of eukaryotic cells	2.48e-07	ANTXR1, CAV1, CCL4, CD69, CSF2RB, DKK3, EDNRB, EMP3, FCER1G, FLI1, FST, GLIPR1, GNG2, HGF, IGFBP5, IL6, IL11, IL7R, INHBA, LILRB1, MME, MMP3, NR3C1, PLAT, PLAU, PTGS1, PTGS2, QKI (includes EG:9444), RDX, RUNX2, S100A9, SDC2, SERPINE1, SOCS3, THBD, TNFRSF11B, VCAN	37			Cellular Growth and Proliferation	proliferation	proliferation of cells	7.57e-18	AIM2, BCAT1, BCL6, BCL2A1, CCL4, CCR1, CD14, CDX2, CLEC7A, COL8A1, CR1, CSF3, CSF2RB, CSF3R, CXCL5, EGR1, EREG, FGF2, FPR2, FST, FYB, GAS1, GBP1 (includes EG:2633), HCK, HGF, HOXD13, HSD11B1, ICAM1, IGFBP5, IL6, IL8, IL11, IL24, IL13RA2, IL18RAP, IL1A, IL1B, IL7R, IL8RA, IL8RB, INDO, INHBA, ITGAM, ITGAX, KLK6, LCP2, LILRB1, LY96, MMP3, NAMPT, NFE2, NR3C2, OSM, PAPPA, PDGFD, PROK2, PRRX1, PTGES, P…	80			Cellular Movement	chemotaxis	chemotaxis of neutrophils	7.23e-15	CCL4, CSF3R, CXCL5, CXCL6, CXCL10, CXCL14, FCGR2A, FPR1, IL8, IL1B, IL8RB, PDE4B, S100A8, S100A9, SELE	15
	Cellular Movement	homing	homing of neutrophils	2.62e-07	CCL2, CCL4, CXCL5, CXCL6, FCER1G, FCGR2A, PDE4B, S100A9, SELE	9			Cellular Movement	chemotaxis	chemotaxis of phagocytes	8.93e-18	CCL4, CSF3R, CXCL5, CXCL6, CXCL14, FCER1G, FCGR2A, FGR, FPR1, FPR2, GNLY, HCK, IL8, IL1B, IL8RA, IL8RB, INHBA, ITGAM, LILRA6, PDE4B, S100A8, S100A9, SELE	23			Hematological System Development and Function	chemotaxis	chemotaxis of neutrophils	7.23e-15	CCL4, CSF3R, CXCL5, CXCL6, CXCL10, CXCL14, FCGR2A, FPR1, IL8, IL1B, IL8RB, PDE4B, S100A8, S100A9, SELE	15
	Hematological System Development and Function	homing	homing of neutrophils	2.62e-07	CCL2, CCL4, CXCL5, CXCL6, FCER1G, FCGR2A, PDE4B, S100A9, SELE	9			Cellular Movement	infiltration	infiltration of lymphatic system cells	8.93e-18	ALOX5AP, CCL4, CCR1, CSF3, DUSP1, FCER1G, FPR2, HGF, ICAM1, IL6, IL8, IL1B, IL8RB, ITGAM, LCP2, OSM, PTGES, PTGS2, SELE, SELL, SELP, SOCS3, SPP1, TLR2, TLR4, TNFAIP3, TNFRSF1B	27			Cell Signaling	quantity	quantity of calcium	7.69e-15	C5AR1, CCL4, CCL8, CCR1, CXCL10, CXCL11, FCGR2A, FCGR3B, FGF2, FPR1, FPR2, HGF, IL6, IL8, IL1B, IL8RB, LCP2, PTPRC, PYY, RGS1, S100A8, S100A9, SELE, SELL, TNFRSF11B, WNT5A	26
	Immune Response	homing	homing of neutrophils	2.62e-07	CCL2, CCL4, CXCL5, CXCL6, FCER1G, FCGR2A, PDE4B, S100A9, SELE	9			Hematological System Development and Function	chemotaxis	chemotaxis of phagocytes	8.93e-18	CCL4, CSF3R, CXCL5, CXCL6, CXCL14, FCER1G, FCGR2A, FGR, FPR1, FPR2, GNLY, HCK, IL8, IL1B, IL8RA, IL8RB, INHBA, ITGAM, LILRA6, PDE4B, S100A8, S100A9, SELE	23			Molecular Transport	quantity	quantity of calcium	7.69e-15	C5AR1, CCL4, CCL8, CCR1, CXCL10, CXCL11, FCGR2A, FCGR3B, FGF2, FPR1, FPR2, HGF, IL6, IL8, IL1B, IL8RB, LCP2, PTPRC, PYY, RGS1, S100A8, S100A9, SELE, SELL, TNFRSF11B, WNT5A	26
	Cellular Movement	cell movement	cell movement of myeloid cells	2.9e-07	CCL2, CCL4, CXCL5, CXCL6, FCER1G, FCGR2A, IL6, PDE4B, PLAT, PTGS2, S100A9, SELE, SOCS3	13			Cellular Movement	homing	homing of phagocytes	1.05e-17	CCL4, CSF3R, CXCL5, CXCL6, CXCL14, FCER1G, FCGR2A, FGR, FPR1, FPR2, GNLY, HCK, IL8, IL1B, IL8RA, IL8RB, INHBA, ITGAM, LILRA6, PDE4B, S100A8, S100A9, SELE	23			Vitamin and Mineral Metabolism	quantity	quantity of calcium	7.69e-15	C5AR1, CCL4, CCL8, CCR1, CXCL10, CXCL11, FCGR2A, FCGR3B, FGF2, FPR1, FPR2, HGF, IL6, IL8, IL1B, IL8RB, LCP2, PTPRC, PYY, RGS1, S100A8, S100A9, SELE, SELL, TNFRSF11B, WNT5A	26
	Hematological System Development and Function	cell movement	cell movement of myeloid cells	2.9e-07	CCL2, CCL4, CXCL5, CXCL6, FCER1G, FCGR2A, IL6, PDE4B, PLAT, PTGS2, S100A9, SELE, SOCS3	13			Hematological System Development and Function	homing	homing of phagocytes	1.05e-17	CCL4, CSF3R, CXCL5, CXCL6, CXCL14, FCER1G, FCGR2A, FGR, FPR1, FPR2, GNLY, HCK, IL8, IL1B, IL8RA, IL8RB, INHBA, ITGAM, LILRA6, PDE4B, S100A8, S100A9, SELE	23			Immune Response	homing	homing of neutrophils	8.63e-15	CCL4, CSF3R, CXCL5, CXCL6, CXCL10, CXCL14, FCGR2A, FPR1, IL8, IL1B, IL8RB, PDE4B, S100A8, S100A9, SELE	15
	Immune Response	cell movement	cell movement of myeloid cells	2.9e-07	CCL2, CCL4, CXCL5, CXCL6, FCER1G, FCGR2A, IL6, PDE4B, PLAT, PTGS2, S100A9, SELE, SOCS3	13			Cell-To-Cell Signaling and Interaction	binding	binding of phagocytes	1.23e-17	CCR1, FCGR1A, FCGR2A, FCGR3B, FGF2, FGR, FPR1, HCK, ICAM1, IL8, IL1A, ITGAM, PTPRC, S100A9, SELE, SELL, SELP, TLR4	18			Cellular Movement	homing	homing of neutrophils	8.63e-15	CCL4, CSF3R, CXCL5, CXCL6, CXCL10, CXCL14, FCGR2A, FPR1, IL8, IL1B, IL8RB, PDE4B, S100A8, S100A9, SELE	15
	Cellular Movement	cell movement	cell movement of cell lines	3.34e-07	CCL2, CCL4, CCL8, CD69, CXCL5, DKK3, FERMT2, HGF, IL6, PLAU, PTGS2, SDC2, SELE, SERPINE1, WNT5A	15			Immune Response	activation	activation of neutrophils	1.45e-17	C5AR1, CCL4, CD14, CSF3, CXCL6, FPR1, IL6, IL8, IL18RAP, IL1A, IL1B, IL1RN, IL8RB, ITGAM, SELE, SELL, SPP1	17			Hematological System Development and Function	homing	homing of neutrophils	8.63e-15	CCL4, CSF3R, CXCL5, CXCL6, CXCL10, CXCL14, FCGR2A, FPR1, IL8, IL1B, IL8RB, PDE4B, S100A8, S100A9, SELE	15
	Tissue Development	aggregation	aggregation of cells	3.34e-07	CDH11, ENTPD1, FCER1G, FCGR2A, HGF, IL6, LCP2, MMP3, PDPN, PLAT, RUNX2, THBD, WNT5A	13			Hematological System Development and Function	activation	activation of neutrophils	1.45e-17	C5AR1, CCL4, CD14, CSF3, CXCL6, FPR1, IL6, IL8, IL18RAP, IL1A, IL1B, IL1RN, IL8RB, ITGAM, SELE, SELL, SPP1	17			Cancer	cancer	cancer	1.24e-14	AIM2, BCL6, CHI3L1, COL12A1, COL7A1, CSF3R, CXCL10, CXCL14, CYR61, DKK1, FGF2, FST, GAS1, HGF, HSD11B1, IFI44L, IFIT3, IL6, IL8, IL13RA2, IL1A, IL1B, IL1RN, IL7R, IL8RB, INDO, INHBA, KIAA1199, KLK10, MASP1, MME, MMP3, MMP10, MMP1 (includes EG:4312), PAPPA, PDE4B, PI15, PRRX1, PSCDBP, PTGS2, PTPRC, PTX3, S100A8, S100A9, SERPINE1, SLC2A3, SOCS3, SOD2, SPP1, TFPI, TFPI2, TLR2, TNC, TNFRSF11B, TWIST1…	57
	Cellular Movement	cell movement	cell movement of bone marrow cells	3.49e-07	CCL2, CCL4, CXCL5, CXCL6, FCER1G, FCGR2A, IL6, PDE4B, PLAT, PTGS2, S100A9, SELE, SOCS3	13			Cell-To-Cell Signaling and Interaction	activation	activation of neutrophils	1.45e-17	C5AR1, CCL4, CD14, CSF3, CXCL6, FPR1, IL6, IL8, IL18RAP, IL1A, IL1B, IL1RN, IL8RB, ITGAM, SELE, SELL, SPP1	17			Cellular Development	developmental process	developmental process of blood cells	1.96e-14	BCL6, C5AR1, CCL4, CCR1, CD69, CSF3, CSF3R, CXCL10, CXCL11, DKK1, FCGR2A, FGF2, HGF, IL6, IL8, IL33, IL13RA2, IL1A, IL1B, IL1RN, IL7R, INHBA, LCP2, NFE2, OSM, PTGS2, PTPRC, SOCS3, THBS2, TLR8, TNFRSF11B, TREM1	32
	Immune Response	cell movement	cell movement of bone marrow cells	3.49e-07	CCL2, CCL4, CXCL5, CXCL6, FCER1G, FCGR2A, IL6, PDE4B, PLAT, PTGS2, S100A9, SELE, SOCS3	13			Immune and Lymphatic System Development and Function	activation	activation of neutrophils	1.45e-17	C5AR1, CCL4, CD14, CSF3, CXCL6, FPR1, IL6, IL8, IL18RAP, IL1A, IL1B, IL1RN, IL8RB, ITGAM, SELE, SELL, SPP1	17			Cell-To-Cell Signaling and Interaction	adhesion	adhesion of lymphatic system cells	2.11e-14	CCL4, CSF3R, CXCL11, FPR2, HGF, IL6, IL8, IL11, IL1A, IL1B, IL8RB, OSM, RGS1, S100A8, S100A9, SELE, SELL, SPP1, THBS2	19
	Skeletal and Muscular Disorders	skeletal and muscular disorder	skeletal and muscular disorder of rodents	3.57e-07	CCL2, CD69, CD86, FCER1G, FCGR2A, IL6, MMP3, MMP10, PLAU, RUNX2, SOCS3, TNFRSF11B	12			Hematological System Development and Function	quantity	quantity of leukocytes	1.87e-17	BCL2A1, C5AR1, CSF3, CSF2RB, CSF3R, EGR1, FCER1G, FCGR1A, FCGR2A, FPR2, HGF, HLA-DQA1, ICAM1, IL6, IL8, IL11, IL1A, IL1B, IL7R, INHBA, ITGAM, LCP2, MMP3, OSM, PDE4B, PROK2, PTPRC, RHOH, S100A8, S100A9, SELE, SELL, SOCS3, TLR2, TLR4, TNFRSF1B, TNFSF13B	37			Cellular Movement	migration	migration of neutrophils	2.2e-14	CCR1, CXCL5, CXCL6, FPR1, IL6, IL8, IL1B, IL8RB, PDE4B, S100A8, S100A9, SELE, SELL, SERPINE1	14
	Hematological Disease	thrombosis	thrombosis	3.57e-07	IL6, PLAT, PLAU, PTGS1, PTGS2, SERPINE1, TFPI, THBD	8			Immune and Lymphatic System Development and Function	quantity	quantity of leukocytes	1.87e-17	BCL2A1, C5AR1, CSF3, CSF2RB, CSF3R, EGR1, FCER1G, FCGR1A, FCGR2A, FPR2, HGF, HLA-DQA1, ICAM1, IL6, IL8, IL11, IL1A, IL1B, IL7R, INHBA, ITGAM, LCP2, MMP3, OSM, PDE4B, PROK2, PTPRC, RHOH, S100A8, S100A9, SELE, SELL, SOCS3, TLR2, TLR4, TNFRSF1B, TNFSF13B	37			Cellular Movement	movement	movement of neutrophils	2.2e-14	CCR1, CXCL5, CXCL6, FPR1, IL6, IL8, IL1B, IL8RB, PDE4B, S100A8, S100A9, SELE, SELL, SERPINE1	14
	Cardiovascular Disease	thrombosis	thrombosis	3.57e-07	IL6, PLAT, PLAU, PTGS1, PTGS2, SERPINE1, TFPI, THBD	8			Tissue Morphology	quantity	quantity of leukocytes	1.87e-17	BCL2A1, C5AR1, CSF3, CSF2RB, CSF3R, EGR1, FCER1G, FCGR1A, FCGR2A, FPR2, HGF, HLA-DQA1, ICAM1, IL6, IL8, IL11, IL1A, IL1B, IL7R, INHBA, ITGAM, LCP2, MMP3, OSM, PDE4B, PROK2, PTPRC, RHOH, S100A8, S100A9, SELE, SELL, SOCS3, TLR2, TLR4, TNFRSF1B, TNFSF13B	37			Cell-To-Cell Signaling and Interaction	binding	binding of blood cells	2.27e-14	CCL4, CCR1, CXCL10, CXCL11, F5, FCGR2A, FCGR3B, FGF2, FPR1, HGF, IL8, IL1A, LCP2, NFE2, PTPRC, S100A9, SELE, SELL, TNC	19
	Inflammatory Disease	inflammatory disorder	inflammatory disorder of mice	4.45e-07	CCL2, CD69, CD86, FCER1G, FCGR2A, HGF, IL6, IL13RA2, MME, PLAT, PLAU, PTGS2, SELE, SOCS3, TNFRSF11B	15			Immune Response	activation	activation of myeloid cells	5.36e-17	C5AR1, CCL4, CD14, CSF3, CXCL6, FPR1, IL6, IL8, IL18RAP, IL1A, IL1B, IL1RN, IL8RB, ITGAM, SELE, SELL, SPP1, TREM1	18			Cancer	neoplasia	neoplasia	2.49e-14	AIM2, BCL6, CHI3L1, COL12A1, COL7A1, CSF3R, CXCL10, CXCL14, CYR61, DKK1, FGF2, FST, GAS1, HGF, HSD11B1, IFI44L, IFIT3, IL6, IL8, IL13RA2, IL1A, IL1B, IL1RN, IL7R, IL8RB, INDO, INHBA, KIAA1199, KLK10, MASP1, MME, MMP3, MMP10, MMP1 (includes EG:4312), PAPPA, PDE4B, PI15, PRRX1, PSCDBP, PTGS2, PTPRC, PTX3, S100A8, S100A9, SERPINE1, SLC2A3, SOCS3, SOD2, SPP1, TFPI, TFPI2, THBS2, TLR2, TNC, TNFRSF11B,…	58
	Gene Expression	activation	activation of synthetic promoter	4.45e-07	CSF2RB, CXCL6, DDX58, DKK3, FCGR2A, FLI1, HGF, IL6, IL13RA2, INHBA, LCP2, LOX, NR3C1, PSCDBP, PTGS2, RUNX2, SERPINE1, SOCS3, WIPF1	19			Hematological System Development and Function	activation	activation of myeloid cells	5.36e-17	C5AR1, CCL4, CD14, CSF3, CXCL6, FPR1, IL6, IL8, IL18RAP, IL1A, IL1B, IL1RN, IL8RB, ITGAM, SELE, SELL, SPP1, TREM1	18			Cellular Movement	migration	migration of phagocytes	4.22e-14	CCR1, CXCL5, CXCL6, FPR1, HGF, IL6, IL8, IL1B, IL8RB, PDE4B, PROK2, S100A8, S100A9, SELE, SELL, SERPINE1, SPP1	17
	Tissue Development	formation	formation of tissue	4.6e-07	CCL2, FST, HGF, IGFBP5, IL6, IL11, PLAU, PTGS1, PTGS2, RUNX2, SDC2, SELE, SERPINE1, STC1	14			Cell-To-Cell Signaling and Interaction	activation	activation of myeloid cells	5.36e-17	C5AR1, CCL4, CD14, CSF3, CXCL6, FPR1, IL6, IL8, IL18RAP, IL1A, IL1B, IL1RN, IL8RB, ITGAM, SELE, SELL, SPP1, TREM1	18			Cellular Movement	movement	movement of phagocytes	4.22e-14	CCR1, CXCL5, CXCL6, FPR1, HGF, IL6, IL8, IL1B, IL8RB, PDE4B, PROK2, S100A8, S100A9, SELE, SELL, SERPINE1, SPP1	17
	Cellular Growth and Proliferation	proliferation	proliferation of blood cells	4.87e-07	CAV1, CCL4, CD86, FLI1, FYB, HGF, IL6, IL11, IL7R, INHBA, LCP2, LILRB1, LY96, MMP3, NR3C1, PTGS2, SLAMF7, SOCS3, WIPF1	19			Immune and Lymphatic System Development and Function	activation	activation of myeloid cells	5.36e-17	C5AR1, CCL4, CD14, CSF3, CXCL6, FPR1, IL6, IL8, IL18RAP, IL1A, IL1B, IL1RN, IL8RB, ITGAM, SELE, SELL, SPP1, TREM1	18			Hematological System Development and Function	hematological process	hematological process	4.45e-14	BCL6, CCR1, CD69, CSF3, CSF3R, CXCL11, DKK1, F5, FCGR2A, FST, IL6, IL8, IL11, IL13RA2, IL1A, IL1B, IL1RN, IL7R, INHBA, LCP2, MMP1 (includes EG:4312), NFE2, OSM, PTGS2, PTPRC, SERPINE1, SOCS3, TFPI, THBS2, TNFRSF11B, TREM1	31
	Cancer	adhesion	adhesion of tumor cell lines	5.43e-07	CCL2, CCL4, DKK3, HGF, IL6, PLAU, PSCDBP, SDC2, SELE, THBD, VCAN, ZEB1	12			Immune Response	homing	homing of bone marrow cells	8.02e-17	CCL4, CSF3, CSF3R, CXCL5, CXCL6, CXCL14, FCER1G, FCGR2A, FGR, FPR1, HCK, IL8, IL1B, IL8RA, IL8RB, ITGAM, LILRA6, PDE4B, S100A8, S100A9, SELE	21			Immune Response	homing	homing of bone marrow cells	5.61e-14	CCL4, CSF3, CSF3R, CXCL5, CXCL6, CXCL10, CXCL14, FCGR2A, FPR1, IL8, IL1B, IL8RB, PDE4B, S100A8, S100A9, SELE	16
	Cell-To-Cell Signaling and Interaction	adhesion	adhesion of tumor cell lines	5.43e-07	CCL2, CCL4, DKK3, HGF, IL6, PLAU, PSCDBP, SDC2, SELE, THBD, VCAN, ZEB1	12			Cellular Movement	homing	homing of bone marrow cells	8.02e-17	CCL4, CSF3, CSF3R, CXCL5, CXCL6, CXCL14, FCER1G, FCGR2A, FGR, FPR1, HCK, IL8, IL1B, IL8RA, IL8RB, ITGAM, LILRA6, PDE4B, S100A8, S100A9, SELE	21			Cellular Movement	homing	homing of bone marrow cells	5.61e-14	CCL4, CSF3, CSF3R, CXCL5, CXCL6, CXCL10, CXCL14, FCGR2A, FPR1, IL8, IL1B, IL8RB, PDE4B, S100A8, S100A9, SELE	16
	Cell Death	apoptosis	apoptosis of eukaryotic cells	5.46e-07	CAV1, CCL4, CD69, CSF2RB, DKK3, EDNRB, FCER1G, FLI1, FST, GLIPR1, GNG2, HGF, IGFBP5, IL6, IL11, IL7R, INHBA, LILRB1, MME, MMP3, NR3C1, PLAT, PLAU, PTGS1, PTGS2, QKI (includes EG:9444), RUNX2, S100A9, SDC2, SERPINE1, SOCS3, TNFRSF11B, VCAN	33			Immune Response	activation	activation of bone marrow cells	1.22e-16	C5AR1, CCL4, CD14, CSF3, CXCL6, FPR1, IL6, IL8, IL18RAP, IL1A, IL1B, IL1RN, IL8RB, ITGAM, SELE, SELL, SPP1, TREM1	18			Cellular Movement	chemotaxis	chemotaxis of cell lines	7.97e-14	CCL4, CCL8, CCR1, CD69, CXCL5, CXCL10, CXCL11, CXCL14, FGF2, FPR1, FPR2, HGF, IL8, IL8RB, PTGS2, RGS1, SELE, TLR2	18
	Cancer	developmental process	developmental process of tumor	5.66e-07	CCL2, CD86, HGF, IGFBP5, IL6, INHBA, MME, MMP3, NR3C1, PLAU, PTGS2, RUNX2, THBD	13			Cell-To-Cell Signaling and Interaction	activation	activation of bone marrow cells	1.22e-16	C5AR1, CCL4, CD14, CSF3, CXCL6, FPR1, IL6, IL8, IL18RAP, IL1A, IL1B, IL1RN, IL8RB, ITGAM, SELE, SELL, SPP1, TREM1	18			Cell Signaling	mobilization	mobilization of calcium	7.97e-14	C5AR1, CCL4, CCL8, CCR1, CXCL10, CXCL11, FCGR2A, FCGR3B, FPR1, FPR2, IL8, IL8RB, LCP2, LILRA5, LILRB1, LILRB2, PROK2, PTPRC, PYY, SELL, TLR2, TREM1, WNT5A	23
	Hematological Disease	thrombosis	thrombosis of carotid artery	6.01e-07	PLAU, SERPINE1, TFPI, THBD	4			Immune and Lymphatic System Development and Function	activation	activation of bone marrow cells	1.22e-16	C5AR1, CCL4, CD14, CSF3, CXCL6, FPR1, IL6, IL8, IL18RAP, IL1A, IL1B, IL1RN, IL8RB, ITGAM, SELE, SELL, SPP1, TREM1	18			Molecular Transport	mobilization	mobilization of calcium	7.97e-14	C5AR1, CCL4, CCL8, CCR1, CXCL10, CXCL11, FCGR2A, FCGR3B, FPR1, FPR2, IL8, IL8RB, LCP2, LILRA5, LILRB1, LILRB2, PROK2, PTPRC, PYY, SELL, TLR2, TREM1, WNT5A	23
	Cardiovascular Disease	cardiovascular disorder	cardiovascular disorder of carotid artery	6.01e-07	PLAU, SERPINE1, TFPI, THBD	4			Hematological System Development and Function	quantity	quantity of granulocytes	1.41e-16	C5AR1, CSF3, CSF2RB, CSF3R, FCGR1A, FPR2, ICAM1, IL6, IL8, IL1A, IL1B, MMP3, PDE4B, PROK2, S100A8, S100A9, SELE, SELL, SOCS3, TLR4, TNFRSF1B	21			Vitamin and Mineral Metabolism	mobilization	mobilization of calcium	7.97e-14	C5AR1, CCL4, CCL8, CCR1, CXCL10, CXCL11, FCGR2A, FCGR3B, FPR1, FPR2, IL8, IL8RB, LCP2, LILRA5, LILRB1, LILRB2, PROK2, PTPRC, PYY, SELL, TLR2, TREM1, WNT5A	23
	Cardiovascular Disease	thrombosis	thrombosis of carotid artery	6.01e-07	PLAU, SERPINE1, TFPI, THBD	4			Immune and Lymphatic System Development and Function	quantity	quantity of granulocytes	1.41e-16	C5AR1, CSF3, CSF2RB, CSF3R, FCGR1A, FPR2, ICAM1, IL6, IL8, IL1A, IL1B, MMP3, PDE4B, PROK2, S100A8, S100A9, SELE, SELL, SOCS3, TLR4, TNFRSF1B	21			Hematological System Development and Function	quantity	quantity of granulocytes	8.41e-14	C5AR1, CSF3, CSF3R, FPR2, IL6, IL8, IL1A, IL1B, MMP3, PDE4B, PROK2, S100A8, S100A9, SELE, SELL, SOCS3	16
	Inflammatory Disease	inflammatory bowel disease	inflammatory bowel disease	6.19e-07	CD86, CSF2RB, IL6, IL13RA2, NR3C1, PDE4B, PTGS1, PTGS2, THBD, TNFRSF11B	10			Tissue Morphology	quantity	quantity of granulocytes	1.41e-16	C5AR1, CSF3, CSF2RB, CSF3R, FCGR1A, FPR2, ICAM1, IL6, IL8, IL1A, IL1B, MMP3, PDE4B, PROK2, S100A8, S100A9, SELE, SELL, SOCS3, TLR4, TNFRSF1B	21			Tissue Morphology	quantity	quantity of granulocytes	8.41e-14	C5AR1, CSF3, CSF3R, FPR2, IL6, IL8, IL1A, IL1B, MMP3, PDE4B, PROK2, S100A8, S100A9, SELE, SELL, SOCS3	16
	Hematological Disease	bleeding	bleeding	6.19e-07	ABCA1, FCGR2A, FLI1, INHBA, LCP2, PLAT, PTGS1, PTGS2, SELE, SERPINE1	10			Hematological System Development and Function	hematological process	hematological process	1.98e-16	BCL6, CCR1, CD14, CSF3, CSF2RB, CSF3R, CXCL11, DUSP1, EGR1, F5, FCER1G, FCGR2A, FST, HBB (includes EG:3043), HLA-DQA1, ICAM1, IL6, IL8, IL11, IL13RA2, IL1A, IL1B, IL1RN, IL7R, INHBA, LCP2, MMP1 (includes EG:4312), NFE2, OSM, PTGS2, PTPRC, RHOH, SERPINE1, SOCS3, TFPI, THBS2, TLR4, TNFRSF11B, TNFRSF1B, TNFSF13B, TREM1, ZFP36	42			Immune and Lymphatic System Development and Function	quantity	quantity of granulocytes	8.41e-14	C5AR1, CSF3, CSF3R, FPR2, IL6, IL8, IL1A, IL1B, MMP3, PDE4B, PROK2, S100A8, S100A9, SELE, SELL, SOCS3	16
	Gastrointestinal Disease	inflammatory bowel disease	inflammatory bowel disease	6.19e-07	CD86, CSF2RB, IL6, IL13RA2, NR3C1, PDE4B, PTGS1, PTGS2, THBD, TNFRSF11B	10			Cell-To-Cell Signaling and Interaction	binding	binding of lymphatic system cells	2.34e-16	CCL4, CCR1, CXCL11, FCGR1A, FCGR2A, FCGR3B, FGF2, FGR, FPR1, HCK, HGF, ICAM1, IL8, IL1A, ITGAM, PTPRC, S100A9, SELE, SELL, SELP, TLR4, TNC	22			Cellular Growth and Proliferation	proliferation	proliferation of cell lines	9.25e-14	AIM2, BCL6, CLEC7A, CSF3, CSF3R, CXCL10, CYR61, FGF2, FPR2, FST, HGF, HSD11B1, IL6, IL8, IL11, IL13RA2, IL1A, IL1B, IL7R, IL8RB, INHBA, NFE2, OSM, PAPPA, PTGS2, PTPRC, PTX3, S100A8, S100A9, SERPINE1, SOCS3, SOD2, SPP1, TFPI2, VCAN, WNT5A	36
	Tissue Morphology	quantity	quantity of phagocytes	6.29e-07	ABCA1, CCL2, FLI1, IL11, MMP3, PDE4B, PLAT, PLAU, S100A9, SELE, SOCS3	11			Immune Response	chemotaxis	chemotaxis of granulocytes	3.05e-16	CCL4, CSF3R, CXCL5, CXCL6, CXCL14, FCER1G, FCGR2A, FGR, FPR1, HCK, IL8, IL1B, IL8RA, IL8RB, ITGAM, LILRA6, PDE4B, S100A8, S100A9, SELE	20			Dermatological Diseases and Conditions	dermatological disorder	dermatological disorder	9.72e-14	CCL4, COL12A1, COL7A1, COL8A1, CSF3R, EREG, FCGR2A, HGF, IL6, IL8, IL1A, IL1B, IL1RN, KRT6B, LCP2, MMP3, MMP1 (includes EG:4312), OSM, PDE4B, PTGS2, RGS1, S100A8, S100A12, SELE, SELL, SOCS3, TLR1, TLR2, TWIST1	29
	Hematological System Development and Function	quantity	quantity of phagocytes	6.29e-07	ABCA1, CCL2, FLI1, IL11, MMP3, PDE4B, PLAT, PLAU, S100A9, SELE, SOCS3	11			Cellular Movement	chemotaxis	chemotaxis of granulocytes	3.05e-16	CCL4, CSF3R, CXCL5, CXCL6, CXCL14, FCER1G, FCGR2A, FGR, FPR1, HCK, IL8, IL1B, IL8RA, IL8RB, ITGAM, LILRA6, PDE4B, S100A8, S100A9, SELE	20			Reproductive System Disease	endometriosis	endometriosis	1.35e-13	BCAT1, BCL6, CCR1, CYR61, DKK1, FGF2, FPR2, G0S2, IL6, IL8, INHBA, KIAA1199, MMP3, MMP1 (includes EG:4312), PTGS2, S100A8, S100A9, SLC2A3, SPP1, STC1	20
	Immune and Lymphatic System Development and Function	adhesion	adhesion of leukocytes	6.37e-07	CCL2, CCL4, FCGR2A, FYB, HGF, IL6, IL11, PLAU, S100A9, SELE, THBD, TNFRSF11B	12			Hematological System Development and Function	chemotaxis	chemotaxis of granulocytes	3.05e-16	CCL4, CSF3R, CXCL5, CXCL6, CXCL14, FCER1G, FCGR2A, FGR, FPR1, HCK, IL8, IL1B, IL8RA, IL8RB, ITGAM, LILRA6, PDE4B, S100A8, S100A9, SELE	20			Cellular Movement	mobilization	mobilization of eukaryotic cells	1.66e-13	CCL4, CSF3, CXCL10, CXCL14, FPR1, IL8, IL11, IL1B, PROK2, SELE, SELL, SOCS3	12
	Hematological System Development and Function	adhesion	adhesion of leukocytes	6.37e-07	CCL2, CCL4, FCGR2A, FYB, HGF, IL6, IL11, PLAU, S100A9, SELE, THBD, TNFRSF11B	12			Hematological System Development and Function	binding	binding of leukocytes	3.43e-16	CCL4, CCR1, CXCL11, FCGR2A, FCGR3B, FGF2, FGR, FPR1, FYB, HCK, HGF, ICAM1, IL8, IL1A, ITGAM, S100A9, SELE, SELL, SELP, TLR4, TNC	21			Cellular Movement	homing	homing of cell lines	2.16e-13	CCL4, CCL8, CCR1, CD69, CXCL5, CXCL10, CXCL11, CXCL14, FGF2, FPR1, FPR2, HGF, IL8, IL8RB, PTGS2, RGS1, SELE, TLR2	18
	Cell-To-Cell Signaling and Interaction	adhesion	adhesion of leukocytes	6.37e-07	CCL2, CCL4, FCGR2A, FYB, HGF, IL6, IL11, PLAU, S100A9, SELE, THBD, TNFRSF11B	12			Cell-To-Cell Signaling and Interaction	binding	binding of leukocytes	3.43e-16	CCL4, CCR1, CXCL11, FCGR2A, FCGR3B, FGF2, FGR, FPR1, FYB, HCK, HGF, ICAM1, IL8, IL1A, ITGAM, S100A9, SELE, SELL, SELP, TLR4, TNC	21			Cellular Movement	mobilization	mobilization of cells	2.16e-13	CCL4, CSF3, CXCL10, CXCL14, FPR1, IL8, IL11, IL1B, PROK2, SELE, SELL, SOCS3	12
	Cell-To-Cell Signaling and Interaction	adhesion	adhesion of blood cells	6.83e-07	CCL2, CCL4, FCER1G, FCGR2A, FYB, HGF, IL6, IL11, PLAU, S100A9, SELE, THBD, TNFRSF11B	13			Immune and Lymphatic System Development and Function	binding	binding of leukocytes	3.43e-16	CCL4, CCR1, CXCL11, FCGR2A, FCGR3B, FGF2, FGR, FPR1, FYB, HCK, HGF, ICAM1, IL8, IL1A, ITGAM, S100A9, SELE, SELL, SELP, TLR4, TNC	21			Immune Response	infiltration	infiltration of granulocytes	3.09e-13	CCL4, CCR1, CSF3, CXCL10, FPR2, IL6, IL8, IL1B, IL8RB, OSM, PTGS2, SELE, SELL, SOCS3, SPP1, TLR2	16
	Cellular Movement	infiltration	infiltration of lymphatic system cells	7.84e-07	CCL2, CCL4, CD86, FCER1G, HGF, IL6, LCP2, PLAT, PLAU, PTGS2, SELE, SOCS3	12			Immune Response	homing	homing of granulocytes	3.66e-16	CCL4, CSF3R, CXCL5, CXCL6, CXCL14, FCER1G, FCGR2A, FGR, FPR1, HCK, IL8, IL1B, IL8RA, IL8RB, ITGAM, LILRA6, PDE4B, S100A8, S100A9, SELE	20			Cellular Movement	infiltration	infiltration of granulocytes	3.09e-13	CCL4, CCR1, CSF3, CXCL10, FPR2, IL6, IL8, IL1B, IL8RB, OSM, PTGS2, SELE, SELL, SOCS3, SPP1, TLR2	16
	Cellular Movement	infiltration	infiltration of phagocytes	8.12e-07	CCL2, CCL4, FCER1G, HGF, IL6, PLAT, PLAU, PTGS2, SELE, SOCS3	10			Cellular Movement	homing	homing of granulocytes	3.66e-16	CCL4, CSF3R, CXCL5, CXCL6, CXCL14, FCER1G, FCGR2A, FGR, FPR1, HCK, IL8, IL1B, IL8RA, IL8RB, ITGAM, LILRA6, PDE4B, S100A8, S100A9, SELE	20			Hematological System Development and Function	infiltration	infiltration of granulocytes	3.09e-13	CCL4, CCR1, CSF3, CXCL10, FPR2, IL6, IL8, IL1B, IL8RB, OSM, PTGS2, SELE, SELL, SOCS3, SPP1, TLR2	16
	Hematological System Development and Function	infiltration	infiltration of phagocytes	8.12e-07	CCL2, CCL4, FCER1G, HGF, IL6, PLAT, PLAU, PTGS2, SELE, SOCS3	10			Hematological System Development and Function	homing	homing of granulocytes	3.66e-16	CCL4, CSF3R, CXCL5, CXCL6, CXCL14, FCER1G, FCGR2A, FGR, FPR1, HCK, IL8, IL1B, IL8RA, IL8RB, ITGAM, LILRA6, PDE4B, S100A8, S100A9, SELE	20			Immune Response	chemotaxis	chemotaxis of granulocytes	3.58e-13	CCL4, CSF3R, CXCL5, CXCL6, CXCL10, CXCL14, FCGR2A, FPR1, IL8, IL1B, IL8RB, PDE4B, S100A8, S100A9, SELE	15
	Cellular Growth and Proliferation	growth	growth of tumor cell lines	8.95e-07	CAV1, CXCR7, DKK3, FCER1G, FST, HGF, IGFBP5, IL6, INHBA, LOX, MIRN155 (includes EG:114614), NR3C1, PLAU, PTGS2, RUNX2, SDC2, SERPINE1, SOCS3, THBD, WNT5A	20			Immune and Lymphatic System Development and Function	quantity	quantity of bone marrow cells	4.01e-16	C5AR1, CSF3, CSF2RB, CSF3R, FCGR1A, FPR2, ICAM1, IL6, IL8, IL1A, IL1B, MMP3, PDE4B, PROK2, S100A8, S100A9, SELE, SELL, SELP, SOCS3, THBS2, TLR4, TNFRSF1B	23			Cellular Movement	chemotaxis	chemotaxis of granulocytes	3.58e-13	CCL4, CSF3R, CXCL5, CXCL6, CXCL10, CXCL14, FCGR2A, FPR1, IL8, IL1B, IL8RB, PDE4B, S100A8, S100A9, SELE	15
	Cancer	growth	growth of tumor cell lines	8.95e-07	CAV1, CXCR7, DKK3, FCER1G, FST, HGF, IGFBP5, IL6, INHBA, LOX, MIRN155 (includes EG:114614), NR3C1, PLAU, PTGS2, RUNX2, SDC2, SERPINE1, SOCS3, THBD, WNT5A	20			Tissue Morphology	quantity	quantity of bone marrow cells	4.01e-16	C5AR1, CSF3, CSF2RB, CSF3R, FCGR1A, FPR2, ICAM1, IL6, IL8, IL1A, IL1B, MMP3, PDE4B, PROK2, S100A8, S100A9, SELE, SELL, SELP, SOCS3, THBS2, TLR4, TNFRSF1B	23			Hematological System Development and Function	chemotaxis	chemotaxis of granulocytes	3.58e-13	CCL4, CSF3R, CXCL5, CXCL6, CXCL10, CXCL14, FCGR2A, FPR1, IL8, IL1B, IL8RB, PDE4B, S100A8, S100A9, SELE	15
	Organismal Injury and Abnormalities	fibrosis	fibrosis	9.02e-07	CAV1, CCL8, CXCL6, HGF, IL6, IL11, IL13RA2, PDE4B, PDPN, PLAU, PTGS2, SERPINE1	12			Immune Response	chemotaxis	chemotaxis of bone marrow cells	5.34e-16	CCL4, CSF3R, CXCL5, CXCL6, CXCL14, FCER1G, FCGR2A, FGR, FPR1, HCK, IL8, IL1B, IL8RA, IL8RB, ITGAM, LILRA6, PDE4B, S100A8, S100A9, SELE	20			Immune Response	homing	homing of granulocytes	4.11e-13	CCL4, CSF3R, CXCL5, CXCL6, CXCL10, CXCL14, FCGR2A, FPR1, IL8, IL1B, IL8RB, PDE4B, S100A8, S100A9, SELE	15
	Inflammatory Disease	inflammation	inflammation of animal	9.74e-07	CAV1, CCL2, FCER1G, IL6, IL11, PTGS1, PTGS2, THBD	8			Cellular Movement	chemotaxis	chemotaxis of bone marrow cells	5.34e-16	CCL4, CSF3R, CXCL5, CXCL6, CXCL14, FCER1G, FCGR2A, FGR, FPR1, HCK, IL8, IL1B, IL8RA, IL8RB, ITGAM, LILRA6, PDE4B, S100A8, S100A9, SELE	20			Cellular Movement	homing	homing of granulocytes	4.11e-13	CCL4, CSF3R, CXCL5, CXCL6, CXCL10, CXCL14, FCGR2A, FPR1, IL8, IL1B, IL8RB, PDE4B, S100A8, S100A9, SELE	15
	Immune Response	inflammation	inflammation of animal	9.74e-07	CAV1, CCL2, FCER1G, IL6, IL11, PTGS1, PTGS2, THBD	8			Cellular Movement	infiltration	infiltration of eukaryotic cells	5.73e-16	ALOX5AP, CCL4, CCR1, CSF3, DUSP1, FCER1G, FPR2, HGF, ICAM1, IL6, IL8, IL1B, IL8RB, ITGAM, LCP2, OSM, PTGES, PTGS2, SELE, SELL, SELP, SOCS3, SPP1, TLR2, TLR4, TNFAIP3, TNFRSF1B	27			Hematological System Development and Function	homing	homing of granulocytes	4.11e-13	CCL4, CSF3R, CXCL5, CXCL6, CXCL10, CXCL14, FCGR2A, FPR1, IL8, IL1B, IL8RB, PDE4B, S100A8, S100A9, SELE	15
	Cardiovascular Disease	cardiovascular disorder	cardiovascular disorder of artery	9.91e-07	ABCA1, CAV1, PLAU, SERPINE1, TFPI, THBD, TNFRSF11B	7			Immune Response	activation	activation of granulocytes	7.73e-16	C5AR1, CCL4, CD14, CSF3, CXCL6, FPR1, IL6, IL8, IL18RAP, IL1A, IL1B, IL1RN, IL8RB, ITGAM, SELE, SELL, SPP1	17			Immune Response	infiltration	infiltration of myeloid cells	5.01e-13	CCL4, CCR1, CSF3, CXCL10, FPR2, IL6, IL8, IL1B, IL8RB, OSM, PTGS2, SELE, SELL, SOCS3, SPP1, TLR2	16
	Cellular Movement	migration	migration of granulocytes	1.04e-06	CCL4, CXCL5, CXCL6, IL6, PDE4B, PLAU, S100A9, SELE, SERPINE1	9			Hematological System Development and Function	activation	activation of granulocytes	7.73e-16	C5AR1, CCL4, CD14, CSF3, CXCL6, FPR1, IL6, IL8, IL18RAP, IL1A, IL1B, IL1RN, IL8RB, ITGAM, SELE, SELL, SPP1	17			Cellular Movement	infiltration	infiltration of myeloid cells	5.01e-13	CCL4, CCR1, CSF3, CXCL10, FPR2, IL6, IL8, IL1B, IL8RB, OSM, PTGS2, SELE, SELL, SOCS3, SPP1, TLR2	16
	Cellular Movement	movement	movement of granulocytes	1.04e-06	CCL4, CXCL5, CXCL6, IL6, PDE4B, PLAU, S100A9, SELE, SERPINE1	9			Cell-To-Cell Signaling and Interaction	activation	activation of granulocytes	7.73e-16	C5AR1, CCL4, CD14, CSF3, CXCL6, FPR1, IL6, IL8, IL18RAP, IL1A, IL1B, IL1RN, IL8RB, ITGAM, SELE, SELL, SPP1	17			Hematological System Development and Function	infiltration	infiltration of myeloid cells	5.01e-13	CCL4, CCR1, CSF3, CXCL10, FPR2, IL6, IL8, IL1B, IL8RB, OSM, PTGS2, SELE, SELL, SOCS3, SPP1, TLR2	16
	Cellular Movement	migration	migration of neutrophils	1.05e-06	CXCL5, CXCL6, IL6, PDE4B, PLAU, S100A9, SELE, SERPINE1	8			Immune and Lymphatic System Development and Function	activation	activation of granulocytes	7.73e-16	C5AR1, CCL4, CD14, CSF3, CXCL6, FPR1, IL6, IL8, IL18RAP, IL1A, IL1B, IL1RN, IL8RB, ITGAM, SELE, SELL, SPP1	17			Immune Response	chemotaxis	chemotaxis of bone marrow cells	5.41e-13	CCL4, CSF3R, CXCL5, CXCL6, CXCL10, CXCL14, FCGR2A, FPR1, IL8, IL1B, IL8RB, PDE4B, S100A8, S100A9, SELE	15
	Cellular Movement	movement	movement of neutrophils	1.05e-06	CXCL5, CXCL6, IL6, PDE4B, PLAU, S100A9, SELE, SERPINE1	8			Cellular Movement	infiltration	infiltration of cells	1.81e-15	ALOX5AP, CCL4, CCR1, CSF3, DUSP1, FCER1G, FPR2, HGF, ICAM1, IL6, IL8, IL1B, IL8RB, ITGAM, LCP2, OSM, PTGES, PTGS2, SELE, SELL, SELP, SOCS3, SPP1, TLR2, TLR4, TNFAIP3, TNFRSF1B	27			Cellular Movement	chemotaxis	chemotaxis of bone marrow cells	5.41e-13	CCL4, CSF3R, CXCL5, CXCL6, CXCL10, CXCL14, FCGR2A, FPR1, IL8, IL1B, IL8RB, PDE4B, S100A8, S100A9, SELE	15
	Tissue Morphology	quantity	quantity of lymphocytes	1.05e-06	CD69, CD86, CSF2RB, DKK3, FCER1G, FCGR2A, FLI1, IL6, IL7R, INHBA, LCP2, NR3C1, PSCDBP, RUNX2, SELE	15			Cellular Movement	infiltration	infiltration of blood cells	2.55e-15	ALOX5AP, CCL4, CCR1, CSF3, DUSP1, FCER1G, FPR2, HGF, ICAM1, IL6, IL8, IL1B, IL8RB, ITGAM, OSM, PTGES, PTGS2, SELE, SELL, SELP, SOCS3, SPP1, TLR2, TLR4, TNFAIP3, TNFRSF1B	26			Immune Response	chemotaxis	chemotaxis of mononuclear leukocytes	5.58e-13	CCL4, CCL8, CCR1, CXCL10, CXCL11, FPR1, FPR2, GNLY, IL8, IL1B, INHBA, RGS1, SELE, SOCS3, SPP1, THBS2	16
	Immune and Lymphatic System Development and Function	quantity	quantity of lymphocytes	1.05e-06	CD69, CD86, CSF2RB, DKK3, FCER1G, FCGR2A, FLI1, IL6, IL7R, INHBA, LCP2, NR3C1, PSCDBP, RUNX2, SELE	15			Immune Response	activation	activation of antigen presenting cells	2.9e-15	CCL4, CD14, CD93, CSF3, FCER1G, FCGR1A, FCGR2A, HCK, HLA-DQA1, ICAM1, IL6, IL8, IL1B, LY96, PTGES, PTGS2, SLC11A1, TLR2, TLR4, TNFRSF1B, TREM1	21			Cellular Movement	chemotaxis	chemotaxis of mononuclear leukocytes	5.58e-13	CCL4, CCL8, CCR1, CXCL10, CXCL11, FPR1, FPR2, GNLY, IL8, IL1B, INHBA, RGS1, SELE, SOCS3, SPP1, THBS2	16
	Hematological System Development and Function	quantity	quantity of lymphocytes	1.05e-06	CD69, CD86, CSF2RB, DKK3, FCER1G, FCGR2A, FLI1, IL6, IL7R, INHBA, LCP2, NR3C1, PSCDBP, RUNX2, SELE	15			Hematological System Development and Function	quantity	quantity of myeloid cells	2.9e-15	C5AR1, CSF3, CSF2RB, CSF3R, FCGR1A, FPR2, ICAM1, IL6, IL8, IL1A, IL1B, MMP3, PDE4B, PROK2, S100A8, S100A9, SELE, SELL, SOCS3, TLR4, TNFRSF1B	21			Hematological System Development and Function	chemotaxis	chemotaxis of mononuclear leukocytes	5.58e-13	CCL4, CCL8, CCR1, CXCL10, CXCL11, FPR1, FPR2, GNLY, IL8, IL1B, INHBA, RGS1, SELE, SOCS3, SPP1, THBS2	16
	Tissue Development	accumulation	accumulation of cells	1.05e-06	CCL2, CD86, HGF, IL6, IL11, MMP3, NR3C1, PLAT, PLAU, S100A9, SELE, ZEB2	12			Cell-To-Cell Signaling and Interaction	activation	activation of antigen presenting cells	2.9e-15	CCL4, CD14, CD93, CSF3, FCER1G, FCGR1A, FCGR2A, HCK, HLA-DQA1, ICAM1, IL6, IL8, IL1B, LY96, PTGES, PTGS2, SLC11A1, TLR2, TLR4, TNFRSF1B, TREM1	21			Tissue Morphology	quantity	quantity of bone marrow cells	5.58e-13	C5AR1, CSF3, CSF3R, FPR2, IL6, IL8, IL1A, IL1B, MMP3, PDE4B, PROK2, S100A8, S100A9, SELE, SELL, SOCS3, THBS2	17
	Cellular Movement	migration	migration of myeloid cells	1.09e-06	CCL4, CXCL5, CXCL6, IL6, PDE4B, PLAU, S100A9, SELE, SERPINE1	9			Immune and Lymphatic System Development and Function	activation	activation of antigen presenting cells	2.9e-15	CCL4, CD14, CD93, CSF3, FCER1G, FCGR1A, FCGR2A, HCK, HLA-DQA1, ICAM1, IL6, IL8, IL1B, LY96, PTGES, PTGS2, SLC11A1, TLR2, TLR4, TNFRSF1B, TREM1	21			Immune and Lymphatic System Development and Function	quantity	quantity of bone marrow cells	5.58e-13	C5AR1, CSF3, CSF3R, FPR2, IL6, IL8, IL1A, IL1B, MMP3, PDE4B, PROK2, S100A8, S100A9, SELE, SELL, SOCS3, THBS2	17
	Cellular Movement	movement	movement of myeloid cells	1.09e-06	CCL4, CXCL5, CXCL6, IL6, PDE4B, PLAU, S100A9, SELE, SERPINE1	9			Immune and Lymphatic System Development and Function	quantity	quantity of myeloid cells	2.9e-15	C5AR1, CSF3, CSF2RB, CSF3R, FCGR1A, FPR2, ICAM1, IL6, IL8, IL1A, IL1B, MMP3, PDE4B, PROK2, S100A8, S100A9, SELE, SELL, SOCS3, TLR4, TNFRSF1B	21			Immune Response	infiltration	infiltration of neutrophils	6.71e-13	CCL4, CSF3, CXCL10, FPR2, IL6, IL8, IL1B, IL8RB, PTGS2, SELE, SELL, SOCS3, SPP1, TLR2	14
	Cellular Movement	migration	migration of phagocytes	1.14e-06	CCL2, CXCL5, CXCL6, HGF, IL6, PDE4B, PLAU, S100A9, SELE, SERPINE1	10			Tissue Morphology	quantity	quantity of myeloid cells	2.9e-15	C5AR1, CSF3, CSF2RB, CSF3R, FCGR1A, FPR2, ICAM1, IL6, IL8, IL1A, IL1B, MMP3, PDE4B, PROK2, S100A8, S100A9, SELE, SELL, SOCS3, TLR4, TNFRSF1B	21			Cellular Movement	infiltration	infiltration of neutrophils	6.71e-13	CCL4, CSF3, CXCL10, FPR2, IL6, IL8, IL1B, IL8RB, PTGS2, SELE, SELL, SOCS3, SPP1, TLR2	14
	Cellular Movement	movement	movement of phagocytes	1.14e-06	CCL2, CXCL5, CXCL6, HGF, IL6, PDE4B, PLAU, S100A9, SELE, SERPINE1	10			Dermatological Diseases and Conditions	dermatological disorder	dermatological disorder	4.11e-15	CCL4, COL12A1, COL7A1, COL8A1, CSF3R, CYP4F3, DUSP1, EREG, FCER1G, FCGR1A, FCGR2A, HGF, HLA-DQA1, ICAM1, IL6, IL8, IL1A, IL1B, IL1RN, LCP2, MMP3, MMP1 (includes EG:4312), OSM, PDE4B, PTGS2, S100A8, S100A12, SELE, SELL, SELP, SOCS3, TLR1, TLR2, TLR4, TNFAIP3, TNFRSF1B, TWIST1, ZFP36	38			Hematological System Development and Function	infiltration	infiltration of neutrophils	6.71e-13	CCL4, CSF3, CXCL10, FPR2, IL6, IL8, IL1B, IL8RB, PTGS2, SELE, SELL, SOCS3, SPP1, TLR2	14
	Cellular Growth and Proliferation	proliferation	proliferation of smooth muscle cells	1.31e-06	CAV1, CCL2, HGF, IGFBP5, IL6, PLAT, PLAU, PTGS2, SERPINE1, THBD	10			Cell-To-Cell Signaling and Interaction	binding	binding of cell lines	4.76e-15	CD14, CLEC7A, CR1, FCGR2A, FGF2, FYB, HGF, ICAM1, IGFBP5, IL6, IL1A, IL1B, IL8RA, IL8RB, INHBA, ITGAM, ITGAX, OSM, PYY, RHOH, SELE, SELL, SELP, SERPINE1, SPP1, TLR4, TNC	27			Hematological System Development and Function	quantity	quantity of myeloid cells	7.86e-13	C5AR1, CSF3, CSF3R, FPR2, IL6, IL8, IL1A, IL1B, MMP3, PDE4B, PROK2, S100A8, S100A9, SELE, SELL, SOCS3	16
	Skeletal and Muscular System Development and Function	proliferation	proliferation of smooth muscle cells	1.31e-06	CAV1, CCL2, HGF, IGFBP5, IL6, PLAT, PLAU, PTGS2, SERPINE1, THBD	10			Hematological Disease	hematological disorder	hematological disorder of animal	6.99e-15	CD14, CSF3, CSF3R, CXCL14, EGR1, FCER1G, FCGR1A, FCGR2A, HBB (includes EG:3043), HSD11B1, IL6, IL8, IL1A, IL7R, LCP2, NFE2, PTGS2, S100A9, SELE, SELP, SERPINE1, SOCS3, SOD2, THBS2, TLR2, TLR4, TNFRSF1B	27			Tissue Morphology	quantity	quantity of myeloid cells	7.86e-13	C5AR1, CSF3, CSF3R, FPR2, IL6, IL8, IL1A, IL1B, MMP3, PDE4B, PROK2, S100A8, S100A9, SELE, SELL, SOCS3	16
	Hematological Disease	hematological disorder	hematological disorder of animal	1.52e-06	ABCA1, FCER1G, FCGR2A, IL6, IL7R, LCP2, PLAT, PTGS1, PTGS2, S100A9, SELE, SERPINE1, SOCS3	13			Reproductive System Disease	reproductive system disorder	reproductive system disorder	7.47e-15	BCAT1, BCL6, CCR1, DUSP1, EGR1, FGF2, FPR2, FST, G0S2, ICAM1, IL6, IL8, INHBA, KIAA1199, MMP3, MMP1 (includes EG:4312), NFIL3, OLFM1, PDGFD, PFKFB3, PLCB4, PROK2, PTGS2, S100A8, S100A9, SLC2A3, SPP1, STC1, TLR4, TNFRSF1B, TNFSF13B, ZFP36	32			Immune and Lymphatic System Development and Function	quantity	quantity of myeloid cells	7.86e-13	C5AR1, CSF3, CSF3R, FPR2, IL6, IL8, IL1A, IL1B, MMP3, PDE4B, PROK2, S100A8, S100A9, SELE, SELL, SOCS3	16
	Cellular Growth and Proliferation	proliferation	proliferation of tumor cell lines	1.63e-06	CAV1, CCL2, ENTPD1, FLI1, FST, HGF, IGFBP5, IL6, IL11, INHBA, NR3C1, PLAT, PLAU, PTGS2, SERPINE1, SOCS3, TFPI2, VCAN, WNT5A	19			Inflammatory Disease	inflammatory disorder	inflammatory disorder of rodents	9.23e-15	ALOX5AP, C5AR1, CCR1, CR1, CSF3, DUSP1, EREG, FCER1G, FCGR1A, FCGR2A, HGF, ICAM1, IL6, IL13RA2, IL1A, IL1B, IL1RN, MME, MMP3, PTGS2, PTPRC, SELE, SELP, SOCS3, SPP1, TLR2, TLR4, TNFRSF11B, TNFRSF1B, ZFP36	30			Cell-To-Cell Signaling and Interaction	binding	binding of lymphatic system cells	8.79e-13	CCL4, CCR1, CXCL10, CXCL11, FCGR2A, FCGR3B, FGF2, FPR1, HGF, IL8, IL1A, PTPRC, S100A9, SELE, SELL, TNC	16
	Cancer	proliferation	proliferation of tumor cell lines	1.63e-06	CAV1, CCL2, ENTPD1, FLI1, FST, HGF, IGFBP5, IL6, IL11, INHBA, NR3C1, PLAT, PLAU, PTGS2, SERPINE1, SOCS3, TFPI2, VCAN, WNT5A	19			Immune Response	infiltration	infiltration of leukocytes	1.02e-14	ALOX5AP, CCL4, CCR1, CSF3, DUSP1, FCER1G, FPR2, ICAM1, IL6, IL8, IL1B, IL8RB, ITGAM, OSM, PTGS2, SELE, SELL, SELP, SOCS3, SPP1, TLR2, TLR4, TNFAIP3, TNFRSF1B	24			Cellular Movement	cell movement	cell movement of tumor cell lines	9.7e-13	CCL4, CCL8, CD69, CXCL5, CXCL14, FGF2, FPR1, FPR2, HGF, IL6, IL8, IL8RB, NRCAM, OSM, SELE, SELL, SERPINE1, SPP1, WNT5A	19
	Cell-To-Cell Signaling and Interaction	binding	binding of blood cells	1.63e-06	CCL2, CCL4, CD86, ENTPD1, FCGR2A, FYB, HGF, LCP2, S100A9, SELE, TNC	11			Cellular Movement	infiltration	infiltration of leukocytes	1.02e-14	ALOX5AP, CCL4, CCR1, CSF3, DUSP1, FCER1G, FPR2, ICAM1, IL6, IL8, IL1B, IL8RB, ITGAM, OSM, PTGS2, SELE, SELL, SELP, SOCS3, SPP1, TLR2, TLR4, TNFAIP3, TNFRSF1B	24			Cancer	cell movement	cell movement of tumor cell lines	9.7e-13	CCL4, CCL8, CD69, CXCL5, CXCL14, FGF2, FPR1, FPR2, HGF, IL6, IL8, IL8RB, NRCAM, OSM, SELE, SELL, SERPINE1, SPP1, WNT5A	19
	Gastrointestinal Disease	digestive system disorder	digestive system disorder	1.63e-06	CD86, CSF2RB, EDNRB, IL6, IL11, IL13RA2, NR3C1, PDE4B, PTGS1, PTGS2, THBD, TNFRSF11B, ZEB2	13			Hematological System Development and Function	infiltration	infiltration of leukocytes	1.02e-14	ALOX5AP, CCL4, CCR1, CSF3, DUSP1, FCER1G, FPR2, ICAM1, IL6, IL8, IL1B, IL8RB, ITGAM, OSM, PTGS2, SELE, SELL, SELP, SOCS3, SPP1, TLR2, TLR4, TNFAIP3, TNFRSF1B	24			Cellular Development	development	development of lymphatic system cells	1.62e-12	BCL6, CD69, CSF3, CSF3R, CXCL11, DKK1, FCGR2A, FGF2, FST, IL6, IL11, IL1A, IL1B, IL1RN, IL7R, LCP2, OSM, PTPRC, SOCS3, THBS2, TNFRSF11B	21
	Connective Tissue Disorders	osteoarthritis	osteoarthritis	1.65e-06	CCL2, CXCL6, IL6, NR3C1, PTGS1, PTGS2, TFPI2	7			Inflammatory Disease	inflammatory disorder	inflammatory disorder of mammalia	1.25e-14	ALOX5AP, C5AR1, CCR1, CR1, CSF3, DUSP1, EREG, FCER1G, FCGR1A, FCGR2A, HGF, ICAM1, IL6, IL13RA2, IL1A, IL1B, IL1RN, MME, MMP3, PTGS2, PTPRC, SELE, SELP, SOCS3, SPP1, TLR2, TLR4, TNFRSF11B, TNFRSF1B, ZFP36	30			Cellular Development	differentiation	differentiation of cells	2e-12	BCL6, CCR1, CSF3, CSF3R, CYP26B1, DKK1, EREG, FGF2, FST, GAS1, HGF, HSD11B1, IL6, IL8, IL11, IL13RA2, IL1A, IL1B, IL1RN, IL7R, INHBA, LCP2, MMP3, MMP1 (includes EG:4312), NFE2, OSM, PTGS2, PTPRC, S100A8, S100A9, SOCS3, SPP1, STC1, THBS2, TLR2, TNC, TNFRSF11B, TREM1, TWIST1, VCAN, WNT5A	41
	Inflammatory Disease	osteoarthritis	osteoarthritis	1.65e-06	CCL2, CXCL6, IL6, NR3C1, PTGS1, PTGS2, TFPI2	7			Hematological System Development and Function	adhesion	adhesion of granulocytes	1.44e-14	CSF3R, FGR, FPR2, HCK, ICAM1, IL8, IL1B, IL8RB, ITGAM, ITGAX, S100A8, S100A9, SELE, SELL, SELP, TLR4	16			Connective Tissue Disorders	destruction	destruction of connective tissue	2.14e-12	FCGR2A, FGF2, IL6, IL8, IL1A, IL1B, IL1RN, OSM, TNFRSF11B	9
	Skeletal and Muscular Disorders	osteoarthritis	osteoarthritis	1.65e-06	CCL2, CXCL6, IL6, NR3C1, PTGS1, PTGS2, TFPI2	7			Cell-To-Cell Signaling and Interaction	adhesion	adhesion of granulocytes	1.44e-14	CSF3R, FGR, FPR2, HCK, ICAM1, IL8, IL1B, IL8RB, ITGAM, ITGAX, S100A8, S100A9, SELE, SELL, SELP, TLR4	16			Immune Response	homing	homing of mononuclear leukocytes	2.14e-12	CCL4, CCL8, CCR1, CXCL10, CXCL11, FPR1, FPR2, GNLY, IL8, IL1B, INHBA, RGS1, SELE, SOCS3, SPP1, THBS2	16
	Cellular Growth and Proliferation	proliferation	proliferation of lymphatic system cells	1.68e-06	CAV1, CCL4, CD86, FYB, HGF, IL6, IL11, IL7R, INHBA, LCP2, LILRB1, LY96, MMP3, NR3C1, PTGS2, SLAMF7, SOCS3, WIPF1	18			Immune and Lymphatic System Development and Function	adhesion	adhesion of granulocytes	1.44e-14	CSF3R, FGR, FPR2, HCK, ICAM1, IL8, IL1B, IL8RB, ITGAM, ITGAX, S100A8, S100A9, SELE, SELL, SELP, TLR4	16			Cellular Movement	homing	homing of mononuclear leukocytes	2.14e-12	CCL4, CCL8, CCR1, CXCL10, CXCL11, FPR1, FPR2, GNLY, IL8, IL1B, INHBA, RGS1, SELE, SOCS3, SPP1, THBS2	16
	Inflammatory Disease	inflammation	inflammation of organism	1.68e-06	CAV1, CCL2, FCER1G, IL6, IL11, PTGS1, PTGS2, THBD	8			Tissue Development	adhesion	adhesion of granulocytes	1.44e-14	CSF3R, FGR, FPR2, HCK, ICAM1, IL8, IL1B, IL8RB, ITGAM, ITGAX, S100A8, S100A9, SELE, SELL, SELP, TLR4	16			Hematological System Development and Function	homing	homing of mononuclear leukocytes	2.14e-12	CCL4, CCL8, CCR1, CXCL10, CXCL11, FPR1, FPR2, GNLY, IL8, IL1B, INHBA, RGS1, SELE, SOCS3, SPP1, THBS2	16
	Immune Response	inflammation	inflammation of organism	1.68e-06	CAV1, CCL2, FCER1G, IL6, IL11, PTGS1, PTGS2, THBD	8			Hematological Disease	hematological disorder	hematological disorder of rodents	1.51e-14	CD14, CSF3, CSF3R, CXCL14, EGR1, FCER1G, FCGR1A, FCGR2A, HBB (includes EG:3043), HSD11B1, IL6, IL8, IL1A, IL7R, LCP2, NFE2, PTGS2, S100A9, SELE, SELP, SOCS3, SOD2, THBS2, TLR2, TLR4, TNFRSF1B	26			Tissue Morphology	destruction	destruction of connective tissue	2.14e-12	FCGR2A, FGF2, IL6, IL8, IL1A, IL1B, IL1RN, OSM, TNFRSF11B	9
	Cellular Movement	chemotaxis	chemotaxis of granulocytes	1.7e-06	CCL2, CCL4, CXCL5, CXCL6, FCER1G, FCGR2A, PDE4B, S100A9, SELE	9			Infectious Disease	severe acute respiratory syndrome	severe acute respiratory syndrome	1.79e-14	ACSL1, ANPEP, CLEC4E, CSF2RB, EGR1, FPR1, IL6, IL8RA, ITGAM, LILRA2, LILRA3, MNDA, NFE2, NFIL3, RAB31, S100A9, S100A12, SLC2A3, TLR2	19			Hematological System Development and Function	binding	binding of leukocytes	2.86e-12	CCL4, CCR1, CXCL10, CXCL11, FCGR2A, FCGR3B, FGF2, FPR1, HGF, IL8, IL1A, S100A9, SELE, SELL, TNC	15
	Hematological System Development and Function	chemotaxis	chemotaxis of granulocytes	1.7e-06	CCL2, CCL4, CXCL5, CXCL6, FCER1G, FCGR2A, PDE4B, S100A9, SELE	9			Respiratory Disease	severe acute respiratory syndrome	severe acute respiratory syndrome	1.79e-14	ACSL1, ANPEP, CLEC4E, CSF2RB, EGR1, FPR1, IL6, IL8RA, ITGAM, LILRA2, LILRA3, MNDA, NFE2, NFIL3, RAB31, S100A9, S100A12, SLC2A3, TLR2	19			Cell-To-Cell Signaling and Interaction	binding	binding of leukocytes	2.86e-12	CCL4, CCR1, CXCL10, CXCL11, FCGR2A, FCGR3B, FGF2, FPR1, HGF, IL8, IL1A, S100A9, SELE, SELL, TNC	15
	Immune Response	chemotaxis	chemotaxis of granulocytes	1.7e-06	CCL2, CCL4, CXCL5, CXCL6, FCER1G, FCGR2A, PDE4B, S100A9, SELE	9			Cell-To-Cell Signaling and Interaction	adhesion	adhesion of bone marrow cells	1.83e-14	CSF3R, FGR, FPR2, HCK, ICAM1, IL8, IL1B, IL8RB, ITGAM, ITGAX, S100A8, S100A9, SELE, SELL, SELP, TLR4	16			Immune and Lymphatic System Development and Function	binding	binding of leukocytes	2.86e-12	CCL4, CCR1, CXCL10, CXCL11, FCGR2A, FCGR3B, FGF2, FPR1, HGF, IL8, IL1A, S100A9, SELE, SELL, TNC	15
	Tissue Morphology	quantity	quantity of mononuclear leukocytes	1.76e-06	CD69, CD86, CSF2RB, DKK3, FCER1G, FCGR2A, FLI1, IL6, IL7R, INHBA, LCP2, NR3C1, PSCDBP, RUNX2, SELE	15			Immune and Lymphatic System Development and Function	adhesion	adhesion of bone marrow cells	1.83e-14	CSF3R, FGR, FPR2, HCK, ICAM1, IL8, IL1B, IL8RB, ITGAM, ITGAX, S100A8, S100A9, SELE, SELL, SELP, TLR4	16			Cellular Movement	infiltration	infiltration of lymphatic system cells	3.2e-12	CCL4, CCR1, CSF3, CXCL10, FPR2, HGF, IL6, IL8, IL1B, IL8RB, LCP2, OSM, PTGS2, SELE, SELL, SOCS3, SPP1, TLR2	18
	Immune and Lymphatic System Development and Function	quantity	quantity of mononuclear leukocytes	1.76e-06	CD69, CD86, CSF2RB, DKK3, FCER1G, FCGR2A, FLI1, IL6, IL7R, INHBA, LCP2, NR3C1, PSCDBP, RUNX2, SELE	15			Tissue Development	adhesion	adhesion of bone marrow cells	1.83e-14	CSF3R, FGR, FPR2, HCK, ICAM1, IL8, IL1B, IL8RB, ITGAM, ITGAX, S100A8, S100A9, SELE, SELL, SELP, TLR4	16			Inflammatory Disease	inflammatory disorder	inflammatory disorder of rodents	3.58e-12	C5AR1, CCR1, CD69, CSF3, EREG, FCGR2A, HGF, IL6, IL13RA2, IL1A, IL1B, IL1RN, MME, MMP3, MMP10, PTGS2, PTPRC, SELE, SOCS3, SPP1, TLR2, TNFRSF11B	22
	Hematological System Development and Function	quantity	quantity of mononuclear leukocytes	1.76e-06	CD69, CD86, CSF2RB, DKK3, FCER1G, FCGR2A, FLI1, IL6, IL7R, INHBA, LCP2, NR3C1, PSCDBP, RUNX2, SELE	15			Inflammatory Disease	inflammatory disorder	inflammatory disorder of mice	2.33e-14	ALOX5AP, C5AR1, CCR1, CR1, CSF3, DUSP1, EREG, FCER1G, FCGR1A, FCGR2A, HGF, ICAM1, IL6, IL13RA2, IL1A, IL1B, IL1RN, MME, PTGS2, PTPRC, SELE, SELP, SOCS3, SPP1, TLR2, TLR4, TNFRSF11B, TNFRSF1B, ZFP36	29			Inflammatory Disease	inflammatory disorder	inflammatory disorder of mammalia	4.51e-12	C5AR1, CCR1, CD69, CSF3, EREG, FCGR2A, HGF, IL6, IL13RA2, IL1A, IL1B, IL1RN, MME, MMP3, MMP10, PTGS2, PTPRC, SELE, SOCS3, SPP1, TLR2, TNFRSF11B	22
	Cellular Movement	homing	homing of granulocytes	1.82e-06	CCL2, CCL4, CXCL5, CXCL6, FCER1G, FCGR2A, PDE4B, S100A9, SELE	9			Cellular Development	developmental process	developmental process of blood cells	2.39e-14	BCL6, C5AR1, CCL4, CCR1, CD14, CSF3, CSF2RB, CSF3R, CXCL11, EGR1, FCER1G, FCGR2A, FGF2, HGF, HLA-DQA1, ICAM1, IL6, IL8, IL33, IL13RA2, IL1A, IL1B, IL1RN, IL7R, INHBA, ITGAM, LCP2, NFE2, OSM, PTGS2, PTPRC, RHOH, SOCS3, THBS2, TLR4, TLR8, TNFRSF11B, TNFSF13B, TREM1, ZFP36	40			Cellular Movement	infiltration	infiltration of phagocytes	5.82e-12	CCL4, CSF3, CXCL10, FPR2, HGF, IL6, IL8, IL1B, IL8RB, PTGS2, SELE, SELL, SOCS3, SPP1, TLR2	15
	Hematological System Development and Function	homing	homing of granulocytes	1.82e-06	CCL2, CCL4, CXCL5, CXCL6, FCER1G, FCGR2A, PDE4B, S100A9, SELE	9			Hematological System Development and Function	quantity	quantity of neutrophils	3.79e-14	C5AR1, CSF3, CSF3R, FCGR1A, ICAM1, IL1B, MMP3, PDE4B, PROK2, S100A8, S100A9, SELE, SELL, SOCS3, TLR4, TNFRSF1B	16			Hematological System Development and Function	infiltration	infiltration of phagocytes	5.82e-12	CCL4, CSF3, CXCL10, FPR2, HGF, IL6, IL8, IL1B, IL8RB, PTGS2, SELE, SELL, SOCS3, SPP1, TLR2	15
	Immune Response	homing	homing of granulocytes	1.82e-06	CCL2, CCL4, CXCL5, CXCL6, FCER1G, FCGR2A, PDE4B, S100A9, SELE	9			Immune and Lymphatic System Development and Function	quantity	quantity of neutrophils	3.79e-14	C5AR1, CSF3, CSF3R, FCGR1A, ICAM1, IL1B, MMP3, PDE4B, PROK2, S100A8, S100A9, SELE, SELL, SOCS3, TLR4, TNFRSF1B	16			Organismal Injury and Abnormalities	organismal abnormalities	organismal abnormalities of mice	5.95e-12	CSF3, CSF3R, HGF, IL6, IL8, IL11, MME, MMP1 (includes EG:4312), NFE2, OSM, S100A9, SELE, SOCS3, TLR2	14
	Cellular Growth and Proliferation	formation	formation of osteoclasts	1.83e-06	CCL2, IL6, IL11, INHBA, PTGS2, SOCS3, TNFRSF11B	7			Tissue Morphology	quantity	quantity of neutrophils	3.79e-14	C5AR1, CSF3, CSF3R, FCGR1A, ICAM1, IL1B, MMP3, PDE4B, PROK2, S100A8, S100A9, SELE, SELL, SOCS3, TLR4, TNFRSF1B	16			Cell-To-Cell Signaling and Interaction	binding	binding of phagocytes	7.47e-12	CCR1, CXCL10, FCGR2A, FCGR3B, FGF2, FPR1, IL8, IL1A, PTPRC, S100A9, SELE, SELL	12
	Skeletal and Muscular System Development and Function	formation	formation of osteoclasts	1.83e-06	CCL2, IL6, IL11, INHBA, PTGS2, SOCS3, TNFRSF11B	7			Hematological Disease	hematological disorder	hematological disorder of mammalia	3.79e-14	CD14, CSF3, CSF3R, CXCL14, EGR1, FCER1G, FCGR1A, FCGR2A, HBB (includes EG:3043), HSD11B1, IL6, IL8, IL1A, IL7R, LCP2, NFE2, PTGS2, S100A9, SELE, SELP, SOCS3, SOD2, THBS2, TLR2, TLR4, TNFRSF1B	26			Cellular Movement	cell movement	cell movement of antigen presenting cells	9e-12	C5AR1, CCL4, CCL8, CXCL14, FPR1, FPR2, GNLY, HGF, IL6, IL1A, IL1B, INHBA, PTGS2, SELE, SELL, SPP1	16
	Connective Tissue Development and Function	formation	formation of osteoclasts	1.83e-06	CCL2, IL6, IL11, INHBA, PTGS2, SOCS3, TNFRSF11B	7			Cell Death	apoptosis	apoptosis	3.91e-14	ACSL4, AIM2, ANPEP, BCL6, BCL2A1, CASP4, CCL4, CD14, CD53, CDX2, CR1, CSF3, CSF2RB, CYP26B1, DUSP1, EGR1, FAP, FCER1G, FCGR1A, FGF2, FGR, FST, GADD45B, GAS1, GNLY, GPR65, HCK, HGF, ICAM1, IGFBP5, IL6, IL8, IL11, IL24, IL1A, IL1B, IL1RN, IL7R, IL8RB, INHBA, ITGAM, LILRB1, MME, MMP3, MMP1 (includes EG:4312), NAMPT, NFIL3, OSM, PTGES, PTGS2, PTPRC, S100A8, S100A9, SERPINE1, SFRP2, SLC2A3, SOCS3, SOD…	72			Cell Death	apoptosis	apoptosis	1.1e-11	ACSL4, AIM2, BCL6, BCL2A1, CCL4, CD69, CSF3, CYP26B1, CYR61, DKK1, FAP, FGF2, FST, GAS1, GNLY, HGF, IL6, IL8, IL11, IL24, IL1A, IL1B, IL1RN, IL7R, IL8RB, INHBA, LILRB1, MME, MMP3, MMP10, MMP1 (includes EG:4312), NAMPT, OSM, PTGS2, PTPRC, S100A8, S100A9, SERPINE1, SLC2A3, SOCS3, SOD2, SPP1, SRGN, THBS2, TLR2, TNC, TNFRSF10C, TNFRSF11B, TWIST1, VCAN	50
	Reproductive System Disease	endometriosis	endometriosis	2.01e-06	BCAT1, C1S, CCL2, IL6, INHBA, MMP3, PTGS1, PTGS2, S100A9, SLC2A3, STC1, VIM	12			Cell-To-Cell Signaling and Interaction	binding	binding of tumor cell lines	4.25e-14	CD14, CLEC7A, CR1, FCGR2A, FYB, HGF, IGFBP5, IL6, IL1B, IL8RA, IL8RB, ITGAM, OSM, PYY, RHOH, SELL, SELP, SERPINE1, SPP1, TLR4, TNC	21			Immune Response	cell movement	cell movement of mononuclear leukocytes	1.55e-11	CCL4, CCL8, CCR1, CXCL10, CXCL11, FPR1, FPR2, GNLY, IL6, IL8, IL1B, INHBA, RGS1, SELE, SELL, SOCS3, SPP1, THBS2	18
	Cellular Movement	migration	migration of bone marrow cells	2.08e-06	CCL4, CXCL5, CXCL6, IL6, PDE4B, PLAU, S100A9, SELE, SERPINE1	9			Cancer	binding	binding of tumor cell lines	4.25e-14	CD14, CLEC7A, CR1, FCGR2A, FYB, HGF, IGFBP5, IL6, IL1B, IL8RA, IL8RB, ITGAM, OSM, PYY, RHOH, SELL, SELP, SERPINE1, SPP1, TLR4, TNC	21			Cellular Movement	cell movement	cell movement of mononuclear leukocytes	1.55e-11	CCL4, CCL8, CCR1, CXCL10, CXCL11, FPR1, FPR2, GNLY, IL6, IL8, IL1B, INHBA, RGS1, SELE, SELL, SOCS3, SPP1, THBS2	18
	Cellular Movement	movement	movement of bone marrow cells	2.08e-06	CCL4, CXCL5, CXCL6, IL6, PDE4B, PLAU, S100A9, SELE, SERPINE1	9			Respiratory Disease	respiratory disorder	respiratory disorder	5.45e-14	ACSL1, ANPEP, CD14, CHI3L1, CLEC4E, CSF3, CSF2RB, CXCL11, EGR1, F5, FPR1, HCK, ICAM1, IL6, IL8, IL33, IL8RA, IL8RB, ITGAM, LILRA2, LILRA3, MNDA, NFE2, NFIL3, PDE4B, PTGS2, PTX3, RAB31, S100A9, S100A12, SLC2A3, SPP1, TLR2, TLR4, TREM1	35			Hematological System Development and Function	cell movement	cell movement of mononuclear leukocytes	1.55e-11	CCL4, CCL8, CCR1, CXCL10, CXCL11, FPR1, FPR2, GNLY, IL6, IL8, IL1B, INHBA, RGS1, SELE, SELL, SOCS3, SPP1, THBS2	18
	Cellular Movement	chemotaxis	chemotaxis of bone marrow cells	2.08e-06	CCL2, CCL4, CXCL5, CXCL6, FCER1G, FCGR2A, PDE4B, S100A9, SELE	9			Cancer	tumor	tumor	5.96e-14	AIM2, ANPEP, BCL6, CASP4, CD14, CDX2, CHRDL2, COL12A1, COL7A1, CSF2RB, CSF3R, CST7, CXCL14, DUSP1, EGR1, FGF2, FRZB, GADD45B, GAS1, GBP2, GPR65, HGF, HLA-DRB4, HOXD11, HSD11B1, IFI44L, IFIT3, IGFBP5, IL6, IL13RA2, IL1A, IL1B, IL1RN, IL7R, IL8RB, INHBA, KCNJ2, MME, MMP3, MMP1 (includes EG:4312), NR3C2, PDE4B, PDGFD, PLCB4, PTGES, PTGS2, PTPRC, RGS5, RNF144B, S100A8, S100A9, SERPINB2, SFRP2, SLC16A…	66			Cellular Movement	mobilization	mobilization of blood cells	1.59e-11	CCL4, CSF3, CXCL10, CXCL14, FPR1, IL8, IL11, IL1B, SELE, SELL	10
	Immune Response	chemotaxis	chemotaxis of bone marrow cells	2.08e-06	CCL2, CCL4, CXCL5, CXCL6, FCER1G, FCGR2A, PDE4B, S100A9, SELE	9			Cellular Growth and Proliferation	proliferation	proliferation of lymphatic system cells	6.19e-14	BCL6, CCL4, CD14, CR1, CSF3, CSF3R, EGR1, FGF2, FYB, HCK, HGF, ICAM1, IL6, IL11, IL18RAP, IL1A, IL1B, IL7R, INDO, INHBA, ITGAM, ITGAX, LCP2, LILRB1, LY96, MMP3, NFE2, PTGS2, PTPRC, RGS2, SOCS3, SPP1, TLR2, TLR4, TNFRSF1B, TNFSF13B	36			Hematological System Development and Function	mobilization	mobilization of blood cells	1.59e-11	CCL4, CSF3, CXCL10, CXCL14, FPR1, IL8, IL11, IL1B, SELE, SELL	10
	Cardiovascular Disease	cardiovascular disorder	cardiovascular disorder of blood vessel	2.36e-06	ABCA1, CAV1, PLAU, SERPINE1, TFPI, THBD, TNFRSF11B	7			Hematological Disease	hematological disorder	hematological disorder of mice	6.8e-14	CD14, CSF3, CSF3R, CXCL14, EGR1, FCER1G, FCGR1A, FCGR2A, HBB (includes EG:3043), HSD11B1, IL6, IL8, IL7R, LCP2, NFE2, PTGS2, S100A9, SELE, SELP, SOCS3, SOD2, THBS2, TLR2, TLR4, TNFRSF1B	25			Hematological System Development and Function	quantity	quantity of neutrophils	2.23e-11	C5AR1, CSF3, CSF3R, IL1B, MMP3, PDE4B, PROK2, S100A8, S100A9, SELE, SELL, SOCS3	12
	Genetic Disorder	genetic disorder	genetic disorder	2.92e-06	ABCA1, ACSL4, BICC1, CALD1, CD86, CSF2RB, CXCL6, DDX58, EBI2, EDNRB, FCER1G, FLI1, IGFBP5, IL6, IL7R, LOX, MIRN155 (includes EG:114614), MMP3, MMP10, NR3C1, PDE4B, PTGS2, RDX, RUNX2, SELE, SOCS3, SPG20, TMEM47, TNFRSF11B, VCAN, VIM, WNT5A, ZEB1, ZEB2	34			Inflammatory Disease	dermatitis	dermatitis	9.06e-14	DUSP1, EREG, FCER1G, HLA-DQA1, ICAM1, IL8, IL1A, IL1B, IL1RN, LCP2, MMP3, OSM, PDE4B, SELE, SELP, SOCS3, TLR4, TNFAIP3, TWIST1, ZFP36	20			Tissue Morphology	quantity	quantity of neutrophils	2.23e-11	C5AR1, CSF3, CSF3R, IL1B, MMP3, PDE4B, PROK2, S100A8, S100A9, SELE, SELL, SOCS3	12
	Cellular Movement	homing	homing of bone marrow cells	3.05e-06	CCL2, CCL4, CXCL5, CXCL6, FCER1G, FCGR2A, PDE4B, S100A9, SELE	9			Dermatological Diseases and Conditions	dermatitis	dermatitis	9.06e-14	DUSP1, EREG, FCER1G, HLA-DQA1, ICAM1, IL8, IL1A, IL1B, IL1RN, LCP2, MMP3, OSM, PDE4B, SELE, SELP, SOCS3, TLR4, TNFAIP3, TWIST1, ZFP36	20			Immune and Lymphatic System Development and Function	quantity	quantity of neutrophils	2.23e-11	C5AR1, CSF3, CSF3R, IL1B, MMP3, PDE4B, PROK2, S100A8, S100A9, SELE, SELL, SOCS3	12
	Immune Response	homing	homing of bone marrow cells	3.05e-06	CCL2, CCL4, CXCL5, CXCL6, FCER1G, FCGR2A, PDE4B, S100A9, SELE	9			Hematological System Development and Function	quantity	quantity of phagocytes	9.09e-14	C5AR1, CSF3, CSF3R, FCGR1A, ICAM1, IL8, IL11, IL1A, IL1B, MMP3, PDE4B, PROK2, PTGES, S100A8, S100A9, SELE, SELL, SELP, SOCS3, TLR4, TNFRSF1B	21			Cellular Movement	migration	migration of cell lines	2.51e-11	CCR1, CSF3, CXCL10, CXCL11, CYR61, FGF2, FPR2, HGF, IL6, IL8, IL11, IL1A, MME, MMP3, OSM, PTGS2, SELE, SERPINE1, SOCS3, SOD2, SPP1, TNC, TWIST1, WNT5A	24
	Immune and Lymphatic System Development and Function	activation	activation of leukocytes	3.07e-06	CCL2, CCL4, CCL8, CD86, CXCL6, FCER1G, FCGR2A, FYB, IL6, LCP2, LILRB1, LY96, SELE, TNC	14			Tissue Morphology	quantity	quantity of phagocytes	9.09e-14	C5AR1, CSF3, CSF3R, FCGR1A, ICAM1, IL8, IL11, IL1A, IL1B, MMP3, PDE4B, PROK2, PTGES, S100A8, S100A9, SELE, SELL, SELP, SOCS3, TLR4, TNFRSF1B	21			Hematological Disease	hematological disorder	hematological disorder of animal	2.55e-11	CSF3, CSF3R, CXCL14, FCGR2A, HSD11B1, IL6, IL8, IL1A, IL7R, LCP2, NFE2, PTGS2, S100A9, SELE, SERPINE1, SOCS3, SOD2, THBS2, TLR2	19
	Hematological System Development and Function	activation	activation of leukocytes	3.07e-06	CCL2, CCL4, CCL8, CD86, CXCL6, FCER1G, FCGR2A, FYB, IL6, LCP2, LILRB1, LY96, SELE, TNC	14			Cellular Growth and Proliferation	proliferation	proliferation of blood cells	9.99e-14	BCL6, CCL4, CD14, CR1, CSF3, CSF3R, EGR1, FGF2, FYB, HCK, HGF, ICAM1, IL6, IL8, IL11, IL1A, IL1B, IL7R, INDO, INHBA, ITGAM, ITGAX, LCP2, LILRB1, LY96, MMP3, NFE2, PTGS2, PTPRC, RGS2, SOCS3, SPP1, TLR2, TLR4, TNFRSF1B, TNFSF13B	36			Hematological Disease	hematological disorder	hematological disorder	2.86e-11	BCAT1, CSF3, CSF3R, CXCL10, CXCL14, F5, FCGR2A, FCGR3B, HGF, HSD11B1, IL6, IL8, IL33, IL1A, IL1B, IL7R, INHBA, LCP2, NFE2, PDE4B, PTGS2, PTX3, S100A9, SELE, SELL, SERPINE1, SOCS3, SOD2, TFPI, THBS2, TLR2	31
	Cell-To-Cell Signaling and Interaction	activation	activation of leukocytes	3.07e-06	CCL2, CCL4, CCL8, CD86, CXCL6, FCER1G, FCGR2A, FYB, IL6, LCP2, LILRB1, LY96, SELE, TNC	14			Cellular Function and Maintenance	phagocytosis	phagocytosis	1.01e-13	CD14, CD93, CLEC7A, CR1, CSF3, CSF2RB, CSF3R, FCER1G, FCGR1A, FCGR2A, FCGR3B, FGR, HCK, ICAM1, ITGAM, PTX3, TLR2, TLR4, TREM1	19			Organismal Injury and Abnormalities	leukocytosis	leukocytosis	3.64e-11	CSF3, CSF3R, IL6, IL8, IL1B, S100A9, SELE, SELL, SOCS3, TLR2	10
	Immune Response	activation	activation of leukocytes	3.07e-06	CCL2, CCL4, CCL8, CD86, CXCL6, FCER1G, FCGR2A, FYB, IL6, LCP2, LILRB1, LY96, SELE, TNC	14			Cellular Movement	migration	migration of cell lines	1.03e-13	ANPEP, CCR1, CDX2, CSF3, CSF2RB, CXCL11, EGR1, FGF2, FPR2, HGF, ICAM1, IGFBP5, IL6, IL8, IL11, IL1A, ITGAM, KLK6, MME, MMP3, OSM, PDGFD, PREX1, PTGS2, SELE, SERPINE1, SLC16A4, SOCS3, SOD2, SPP1, TNC, TWIST1, WNT5A	33			Hematological Disease	leukocytosis	leukocytosis	3.64e-11	CSF3, CSF3R, IL6, IL8, IL1B, S100A9, SELE, SELL, SOCS3, TLR2	10
	Cancer	growth	growth of tumor	3.15e-06	CCL2, HGF, IGFBP5, IL6, INHBA, MME, MMP3, PLAU, PTGS2, THBD	10			Cancer	primary tumor	primary tumor	1.18e-13	AIM2, ANPEP, BCL6, CASP4, CD14, CDX2, CHRDL2, COL12A1, COL7A1, CSF2RB, CSF3R, CST7, CXCL14, DUSP1, EGR1, FGF2, FRZB, GADD45B, GAS1, GBP2, GPR65, HGF, HLA-DRB4, HOXD11, HSD11B1, IFI44L, IFIT3, IGFBP5, IL6, IL13RA2, IL1A, IL1B, IL1RN, IL8RB, INHBA, KCNJ2, MME, MMP3, MMP1 (includes EG:4312), NR3C2, PLCB4, PTGES, PTGS2, PTPRC, RGS5, RNF144B, S100A8, S100A9, SERPINB2, SFRP2, SLC16A4, SOCS3, SOD2, SPP1…	62			Tissue Morphology	destruction	destruction of tissue	4.12e-11	FCGR2A, FGF2, IL6, IL8, IL1A, IL1B, IL1RN, OSM, TNFRSF11B	9
	Tumor Morphology	growth	growth of tumor	3.15e-06	CCL2, HGF, IGFBP5, IL6, INHBA, MME, MMP3, PLAU, PTGS2, THBD	10			Cellular Movement	movement	movement of cell lines	2.13e-13	ANPEP, CCR1, CDX2, CSF3, CSF2RB, CXCL11, EGR1, FGF2, FPR2, HGF, ICAM1, IGFBP5, IL6, IL8, IL11, IL1A, ITGAM, KLK6, MME, MMP3, OSM, PDGFD, PREX1, PTGS2, SELE, SERPINE1, SLC16A4, SOCS3, SOD2, SPP1, TNC, TWIST1, WNT5A	33			Organismal Injury and Abnormalities	neutrophilia	neutrophilia	4.12e-11	CSF3, IL6, IL8, IL1B, S100A9, SELE, SELL, SOCS3, TLR2	9
	Connective Tissue Disorders	arthritis	arthritis of rodents	3.21e-06	CCL2, CD69, FCER1G, FCGR2A, IL6, MMP3, MMP10, PLAU, SOCS3	9			Immune Response	phagocytosis	phagocytosis of cells	2.61e-13	CD93, CLEC7A, CR1, CSF3, CSF2RB, CSF3R, FCER1G, FCGR1A, FCGR2A, FCGR3B, FGR, HCK, ICAM1, ITGAM, PTX3, TLR2, TLR4, TREM1	18			Hematological Disease	neutrophilia	neutrophilia	4.12e-11	CSF3, IL6, IL8, IL1B, S100A9, SELE, SELL, SOCS3, TLR2	9
	Connective Tissue Disorders	inflammatory arthropathy	inflammatory arthropathy of rodents	3.21e-06	CCL2, CD69, FCER1G, FCGR2A, IL6, MMP3, MMP10, PLAU, SOCS3	9			Cell-To-Cell Signaling and Interaction	phagocytosis	phagocytosis of cells	2.61e-13	CD93, CLEC7A, CR1, CSF3, CSF2RB, CSF3R, FCER1G, FCGR1A, FCGR2A, FCGR3B, FGR, HCK, ICAM1, ITGAM, PTX3, TLR2, TLR4, TREM1	18			Cellular Movement	movement	movement of cell lines	4.16e-11	CCR1, CSF3, CXCL10, CXCL11, CYR61, FGF2, FPR2, HGF, IL6, IL8, IL11, IL1A, MME, MMP3, OSM, PTGS2, SELE, SERPINE1, SOCS3, SOD2, SPP1, TNC, TWIST1, WNT5A	24
	Inflammatory Disease	arthritis	arthritis of rodents	3.21e-06	CCL2, CD69, FCER1G, FCGR2A, IL6, MMP3, MMP10, PLAU, SOCS3	9			Cellular Function and Maintenance	phagocytosis	phagocytosis of cells	2.61e-13	CD93, CLEC7A, CR1, CSF3, CSF2RB, CSF3R, FCER1G, FCGR1A, FCGR2A, FCGR3B, FGR, HCK, ICAM1, ITGAM, PTX3, TLR2, TLR4, TREM1	18			Immune Response	cell movement	cell movement of T lymphocytes	4.2e-11	CCL4, CCL8, CCR1, CXCL10, CXCL11, GNLY, IL6, IL8, IL1B, SELE, SELL, SOCS3, SPP1, THBS2	14
	Inflammatory Disease	inflammatory arthropathy	inflammatory arthropathy of rodents	3.21e-06	CCL2, CD69, FCER1G, FCGR2A, IL6, MMP3, MMP10, PLAU, SOCS3	9			Immune Response	accumulation	accumulation of lymphatic system cells	4.4e-13	CCR1, CR1, CSF3, EGR1, FGF2, ICAM1, IL8, IL11, IL1B, IL1RN, ITGAM, MMP3, PTX3, S100A8, S100A9, SELE, SELL, SELP, TLR4	19			Cellular Movement	cell movement	cell movement of T lymphocytes	4.2e-11	CCL4, CCL8, CCR1, CXCL10, CXCL11, GNLY, IL6, IL8, IL1B, SELE, SELL, SOCS3, SPP1, THBS2	14
	Skeletal and Muscular Disorders	arthritis	arthritis of rodents	3.21e-06	CCL2, CD69, FCER1G, FCGR2A, IL6, MMP3, MMP10, PLAU, SOCS3	9			Immune and Lymphatic System Development and Function	accumulation	accumulation of lymphatic system cells	4.4e-13	CCR1, CR1, CSF3, EGR1, FGF2, ICAM1, IL8, IL11, IL1B, IL1RN, ITGAM, MMP3, PTX3, S100A8, S100A9, SELE, SELL, SELP, TLR4	19			Hematological System Development and Function	cell movement	cell movement of T lymphocytes	4.2e-11	CCL4, CCL8, CCR1, CXCL10, CXCL11, GNLY, IL6, IL8, IL1B, SELE, SELL, SOCS3, SPP1, THBS2	14
	Skeletal and Muscular Disorders	inflammatory arthropathy	inflammatory arthropathy of rodents	3.21e-06	CCL2, CD69, FCER1G, FCGR2A, IL6, MMP3, MMP10, PLAU, SOCS3	9			Tissue Development	accumulation	accumulation of lymphatic system cells	4.4e-13	CCR1, CR1, CSF3, EGR1, FGF2, ICAM1, IL8, IL11, IL1B, IL1RN, ITGAM, MMP3, PTX3, S100A8, S100A9, SELE, SELL, SELP, TLR4	19			Cellular Movement	infiltration	infiltration of eukaryotic cells	4.73e-11	CCL4, CCR1, CSF3, CXCL10, FPR2, HGF, IL6, IL8, IL1B, IL8RB, LCP2, OSM, PTGS2, SELE, SELL, SOCS3, SPP1, TLR2	18
	Cellular Growth and Proliferation	growth	growth of cell lines	3.28e-06	CAV1, CSF2RB, CXCR7, DKK3, FCER1G, FLI1, FST, HGF, IGFBP5, IL6, INHBA, LOX, MIRN155 (includes EG:114614), NR3C1, PLAU, PTGS2, RUNX2, SDC2, SERPINE1, SOCS3, THBD, WNT5A	22			Hematological System Development and Function	adhesion	adhesion of neutrophils	4.89e-13	CSF3R, ICAM1, IL8, IL1B, IL8RB, ITGAM, ITGAX, S100A8, S100A9, SELE, SELL, SELP, TLR4	13			Hematological System Development and Function	hematopoiesis	hematopoiesis	4.84e-11	BCL6, CCR1, CD69, CSF3, CSF3R, CXCL11, DKK1, FCGR2A, FST, IL6, IL11, IL13RA2, IL1A, IL1B, IL1RN, IL7R, INHBA, LCP2, OSM, PTGS2, PTPRC, SOCS3, THBS2, TNFRSF11B, TREM1	25
	Reproductive System Disease	reproductive system disorder	reproductive system disorder	3.28e-06	BCAT1, C1S, CCL2, EML1 (includes EG:2009), FST, IL6, INHBA, MMP3, NR3C1, PTGS1, PTGS2, S100A9, SLC2A3, STC1, VIM	15			Cell-To-Cell Signaling and Interaction	adhesion	adhesion of neutrophils	4.89e-13	CSF3R, ICAM1, IL8, IL1B, IL8RB, ITGAM, ITGAX, S100A8, S100A9, SELE, SELL, SELP, TLR4	13			Reproductive System Disease	reproductive system disorder	reproductive system disorder	5.16e-11	BCAT1, BCL6, CCR1, CYR61, DKK1, FGF2, FPR2, FST, G0S2, IL6, IL8, INHBA, KIAA1199, MMP3, MMP1 (includes EG:4312), PROK2, PTGS2, S100A8, S100A9, SLC2A3, SPP1, STC1	22
	Organismal Survival	death	death of mammalia	3.44e-06	ABCA1, DDX58, FCER1G, FLI1, HGF, IGFBP5, IL6, LCP2, LOX, LY96, MME, NR3C1, PLAT, PTGS1, PTGS2, ROBO1, RUNX2, SERPINE1, SOCS3, ST8SIA4, THBD, TNFRSF11B	22			Immune and Lymphatic System Development and Function	adhesion	adhesion of neutrophils	4.89e-13	CSF3R, ICAM1, IL8, IL1B, IL8RB, ITGAM, ITGAX, S100A8, S100A9, SELE, SELL, SELP, TLR4	13			Cell Death	cell death	cell death	5.21e-11	ACSL4, AIM2, BCL6, BCL2A1, CCL4, CD69, CSF3, CYP26B1, CYR61, DKK1, FAP, FGF2, FST, GAS1, GNLY, HGF, IL6, IL8, IL11, IL24, IL1A, IL1B, IL1RN, IL7R, IL8RB, INDO, INHBA, LILRB1, MME, MMP3, MMP10, MMP1 (includes EG:4312), NAMPT, NCF2, OSM, PTGS2, PTPRC, PYY, S100A8, S100A9, SERPINE1, SLC2A3, SOCS3, SOD2, SPP1, SRGN, THBS2, TLR2, TNC, TNFRSF10C, TNFRSF11B, TWIST1, VCAN	53
	Cancer	colorectal cancer	colorectal cancer	3.46e-06	ANTXR1, CALD1, CAV1, CCL2, CXCR7, FST, IGFBP5, IL6, MME, MMP3, PAPPA, PDPN, PLAT, PTGS1, PTGS2, SERPINE1, SLC2A3, TFPI, TNFRSF11B	19			Tissue Development	adhesion	adhesion of neutrophils	4.89e-13	CSF3R, ICAM1, IL8, IL1B, IL8RB, ITGAM, ITGAX, S100A8, S100A9, SELE, SELL, SELP, TLR4	13			Tissue Development	accumulation	accumulation of cells	6.25e-11	CCR1, CSF3, CXCL10, FGF2, HGF, IL6, IL8, IL11, IL1B, IL1RN, MMP3, OSM, PTX3, S100A8, S100A9, SELE, SELL	17
	Gastrointestinal Disease	colorectal cancer	colorectal cancer	3.46e-06	ANTXR1, CALD1, CAV1, CCL2, CXCR7, FST, IGFBP5, IL6, MME, MMP3, PAPPA, PDPN, PLAT, PTGS1, PTGS2, SERPINE1, SLC2A3, TFPI, TNFRSF11B	19			Cell Signaling	mobilization	mobilization of calcium	5.16e-13	C5AR1, CCL4, CCR1, CXCL11, FCER1G, FCGR1A, FCGR2A, FCGR2C, FCGR3B, FPR1, FPR2, IL8, IL8RA, IL8RB, LCP2, LILRA5, LILRA6, LILRB1, LILRB2, PILRA, PROK2, PTPRC, PYY, SELL, TLR2, TREM1, WNT5A	27			Cellular Development	developmental process	developmental process of leukocytes	6.86e-11	BCL6, C5AR1, CCR1, CD69, CSF3, CSF3R, CXCL10, CXCL11, DKK1, FCGR2A, IL6, IL8, IL33, IL13RA2, IL1A, IL1B, IL7R, INHBA, LCP2, OSM, PTGS2, PTPRC, SOCS3, TNFRSF11B, TREM1	25
	Cellular Movement	infiltration	infiltration of eukaryotic cells	3.54e-06	CCL2, CCL4, CD86, FCER1G, HGF, IL6, LCP2, PLAT, PLAU, PTGS2, SELE, SOCS3	12			Molecular Transport	mobilization	mobilization of calcium	5.16e-13	C5AR1, CCL4, CCR1, CXCL11, FCER1G, FCGR1A, FCGR2A, FCGR2C, FCGR3B, FPR1, FPR2, IL8, IL8RA, IL8RB, LCP2, LILRA5, LILRA6, LILRB1, LILRB2, PILRA, PROK2, PTPRC, PYY, SELL, TLR2, TREM1, WNT5A	27			Cellular Movement	invasion	invasion of eukaryotic cells	7.9e-11	CHI3L1, CSF3, CXCL10, FGF2, FST, GBP1 (includes EG:2633), HGF, IL8, IL1B, INHBA, MMP3, MMP1 (includes EG:4312), NRCAM, OSM, PAPPA, PTGS2, SOD2, SPP1, TFPI2, THBS2, TWIST1, WNT5A	22
	Connective Tissue Disorders	arthritis	arthritis of mammalia	3.89e-06	CCL2, CD69, FCER1G, FCGR2A, IL6, MMP3, MMP10, PLAU, SOCS3	9			Vitamin and Mineral Metabolism	mobilization	mobilization of calcium	5.16e-13	C5AR1, CCL4, CCR1, CXCL11, FCER1G, FCGR1A, FCGR2A, FCGR2C, FCGR3B, FPR1, FPR2, IL8, IL8RA, IL8RB, LCP2, LILRA5, LILRA6, LILRB1, LILRB2, PILRA, PROK2, PTPRC, PYY, SELL, TLR2, TREM1, WNT5A	27			Cancer	invasion	invasion of eukaryotic cells	7.9e-11	CHI3L1, CSF3, CXCL10, FGF2, FST, GBP1 (includes EG:2633), HGF, IL8, IL1B, INHBA, MMP3, MMP1 (includes EG:4312), NRCAM, OSM, PAPPA, PTGS2, SOD2, SPP1, TFPI2, THBS2, TWIST1, WNT5A	22
	Inflammatory Disease	arthritis	arthritis of mammalia	3.89e-06	CCL2, CD69, FCER1G, FCGR2A, IL6, MMP3, MMP10, PLAU, SOCS3	9			Hematological System Development and Function	hematopoiesis	hematopoiesis	6.08e-13	BCL6, CCR1, CD14, CSF3, CSF2RB, CSF3R, CXCL11, EGR1, FCER1G, FCGR2A, FST, HBB (includes EG:3043), HLA-DQA1, ICAM1, IL6, IL11, IL13RA2, IL1A, IL1B, IL1RN, IL7R, INHBA, LCP2, OSM, PTGS2, PTPRC, RHOH, SOCS3, THBS2, TLR4, TNFRSF11B, TNFSF13B, TREM1, ZFP36	34			Hematological Disease	hematological disorder	hematological disorder of rodents	9.08e-11	CSF3, CSF3R, CXCL14, FCGR2A, HSD11B1, IL6, IL8, IL1A, IL7R, LCP2, NFE2, PTGS2, S100A9, SELE, SOCS3, SOD2, THBS2, TLR2	18
	Skeletal and Muscular Disorders	arthritis	arthritis of mammalia	3.89e-06	CCL2, CD69, FCER1G, FCGR2A, IL6, MMP3, MMP10, PLAU, SOCS3	9			Immune Response	immune response	immune response of organism	6.23e-13	CCR1, CSF3R, EREG, FCER1G, FCGR1A, FCGR2A, FYB, HOXB13, IL6, IL1RN, INDO, INHBA, LILRA2, LILRA3, LILRA6, MX2, OSM, PTGS2, RGS2, TLR1, TLR4, TLR8, TNFSF13B	23			Cellular Movement	infiltration	infiltration of cells	9.66e-11	CCL4, CCR1, CSF3, CXCL10, FPR2, HGF, IL6, IL8, IL1B, IL8RB, LCP2, OSM, PTGS2, SELE, SELL, SOCS3, SPP1, TLR2	18
	Cellular Movement	invasion	invasion of tumor cell lines	4.12e-06	CAV1, DKK3, HGF, LOX, PAPPA, PLAT, PLAU, PTGS2, SDC2, TFPI2, VIM, WNT5A, ZEB2	13			Cell Death	cell death	cell death	6.75e-13	ACSL4, AIM2, ANPEP, BCL6, BCL2A1, CASP4, CCL4, CD14, CD53, CDX2, CR1, CSF3, CSF2RB, CYP26B1, DUSP1, EGR1, FAP, FCER1G, FCGR1A, FGF2, FGR, FST, GADD45B, GAS1, GNLY, GPR65, HCK, HGF, HLA-DRB4, ICAM1, IGFBP5, IL6, IL8, IL11, IL24, IL1A, IL1B, IL1RN, IL7R, IL8RB, INDO, INHBA, ITGAM, LILRB1, MME, MMP3, MMP1 (includes EG:4312), NAMPT, NCF2, NFIL3, OSM, PTGES, PTGS2, PTPRC, PYY, S100A8, S100A9, SERPINE1…	76			Cell-To-Cell Signaling and Interaction	recruitment	recruitment of eukaryotic cells	9.75e-11	C5AR1, CCL4, CCR1, CSF3, CXCL10, FGF2, IL6, IL8, IL1B, IL8RB, SELE, SELL, SERPINE1, THBS2, TLR2	15
	Cellular Movement	invasion	invasion of cell lines	4.12e-06	CAV1, DKK3, HGF, LOX, MMP3, PAPPA, PLAT, PLAU, PTGS2, SDC2, TFPI2, VIM, WNT5A, ZEB2	14			Cellular Movement	cell movement	cell movement of antigen presenting cells	8.11e-13	C5AR1, CCL4, CXCL14, FPR1, FPR2, GNLY, HGF, ICAM1, IL6, IL1A, IL1B, IL8RA, INHBA, PTGES, PTGS2, SELE, SELL, SPP1, TLR4, TNFAIP3	20			Inflammatory Disease	inflammatory disorder	inflammatory disorder of mice	1.18e-10	C5AR1, CCR1, CD69, CSF3, EREG, FCGR2A, HGF, IL6, IL13RA2, IL1A, IL1B, IL1RN, MME, PTGS2, PTPRC, SELE, SOCS3, SPP1, TLR2, TNFRSF11B	20
	Cancer	invasion	invasion of tumor cell lines	4.12e-06	CAV1, DKK3, HGF, LOX, PAPPA, PLAT, PLAU, PTGS2, SDC2, TFPI2, VIM, WNT5A, ZEB2	13			Hematological Disease	hematological disorder	hematological disorder	1.01e-12	BCAT1, CD14, CR1, CSF3, CSF2RB, CSF3R, CXCL14, EGR1, F5, FCER1G, FCGR1A, FCGR2A, FCGR3B, FYB, HBB (includes EG:3043), HGF, HSD11B1, ICAM1, IL6, IL8, IL33, IL1A, IL1B, IL7R, INHBA, LCP2, NFE2, PDE4B, PTGS2, PTX3, S100A9, SELE, SELL, SELP, SERPINE1, SOCS3, SOD2, TFPI, THBS2, TLR2, TLR4, TNFRSF1B	42			Cell-To-Cell Signaling and Interaction	recruitment	recruitment of blood cells	1.34e-10	C5AR1, CCL4, CCR1, CSF3, CXCL10, IL6, IL8, IL1B, IL8RB, SELE, SELL, SERPINE1, THBS2, TLR2	14
	Cancer	invasion	invasion of cell lines	4.12e-06	CAV1, DKK3, HGF, LOX, MMP3, PAPPA, PLAT, PLAU, PTGS2, SDC2, TFPI2, VIM, WNT5A, ZEB2	14			Cell Death	apoptosis	apoptosis of eukaryotic cells	1.01e-12	AIM2, ANPEP, BCL6, BCL2A1, CASP4, CCL4, CD14, CDX2, CR1, CSF3, CSF2RB, CYP26B1, DUSP1, EGR1, FAP, FCER1G, FCGR1A, FGF2, FGR, FST, GADD45B, GNLY, GPR65, HGF, ICAM1, IGFBP5, IL6, IL8, IL11, IL24, IL1A, IL1B, IL1RN, IL7R, INHBA, ITGAM, LILRB1, MME, MMP3, NAMPT, NFIL3, PTGES, PTGS2, PTPRC, S100A8, S100A9, SERPINE1, SFRP2, SOCS3, SOD2, SPP1, THBS2, TLR2, TLR4, TNFAIP3, TNFRSF10C, TNFRSF11B, TNFRSF1B, …	61			Hematological System Development and Function	quantity	quantity of phagocytes	1.39e-10	C5AR1, CSF3, CSF3R, IL8, IL11, IL1A, IL1B, MMP3, PDE4B, PROK2, S100A8, S100A9, SELE, SELL, SOCS3	15
	Cellular Movement	infiltration	infiltration of antigen presenting cells	4.17e-06	CCL2, CCL4, CD86, HGF, IL6, PLAU, PTGS2	7			Organismal Injury and Abnormalities	organismal abnormalities	organismal abnormalities of mice	1.04e-12	CSF3, CSF3R, HBB (includes EG:3043), HGF, IL6, IL8, IL11, IL8RA, MME, MMP1 (includes EG:4312), NFE2, OSM, S100A9, SELE, SELP, SOCS3, TLR2	17			Tissue Morphology	quantity	quantity of phagocytes	1.39e-10	C5AR1, CSF3, CSF3R, IL8, IL11, IL1A, IL1B, MMP3, PDE4B, PROK2, S100A8, S100A9, SELE, SELL, SOCS3	15
	Cellular Growth and Proliferation	growth	growth of cells	4.43e-06	CAV1, CCL2, CCL4, CD86, CSF2RB, CXCR7, DKK3, FCER1G, FLI1, FST, HGF, IGFBP5, IL6, IL11, IL13RA2, IL7R, INHBA, LCP2, LOX, MIRN155 (includes EG:114614), NR3C1, PLAT, PLAU, PTGS2, RUNX2, SDC2, SERPINE1, SOCS3, THBD, VCAN, WNT5A	31			Hematological System Development and Function	binding	binding of neutrophils	1.45e-12	FCGR2A, FCGR3B, FGR, HCK, ICAM1, IL8, ITGAM, S100A9, SELL, SELP, TLR4	11			Cell-To-Cell Signaling and Interaction	recruitment	recruitment of cells	1.52e-10	C5AR1, CCL4, CCR1, CSF3, CXCL10, FGF2, IL6, IL8, IL1B, IL8RB, SELE, SELL, SERPINE1, THBS2, TLR2	15
	Cellular Movement	cell movement	cell movement of antigen presenting cells	4.5e-06	CCL2, CCL4, CCL8, CD86, HGF, IL6, INHBA, PLAU, PTGS2, SELE	10			Cell-To-Cell Signaling and Interaction	binding	binding of neutrophils	1.45e-12	FCGR2A, FCGR3B, FGR, HCK, ICAM1, IL8, ITGAM, S100A9, SELL, SELP, TLR4	11			Immune Response	accumulation	accumulation of lymphatic system cells	1.62e-10	CCR1, CSF3, CXCL10, FGF2, IL8, IL11, IL1B, IL1RN, MMP3, PTX3, S100A8, S100A9, SELE, SELL	14
	Organismal Survival	death	death of animal	4.58e-06	ABCA1, DDX58, FCER1G, FLI1, HGF, IGFBP5, IL6, LCP2, LOX, LY96, MME, NR3C1, PLAT, PTGS1, PTGS2, ROBO1, RUNX2, SERPINE1, SOCS3, ST8SIA4, THBD, TNFRSF11B	22			Immune and Lymphatic System Development and Function	binding	binding of neutrophils	1.45e-12	FCGR2A, FCGR3B, FGR, HCK, ICAM1, IL8, ITGAM, S100A9, SELL, SELP, TLR4	11			Tissue Development	accumulation	accumulation of lymphatic system cells	1.62e-10	CCR1, CSF3, CXCL10, FGF2, IL8, IL11, IL1B, IL1RN, MMP3, PTX3, S100A8, S100A9, SELE, SELL	14
	Connective Tissue Disorders	arthritis	arthritis of animal	4.61e-06	CCL2, CD69, FCER1G, FCGR2A, IL6, MMP3, MMP10, PLAU, SOCS3	9			Cell Signaling	quantity	quantity of calcium	1.47e-12	C5AR1, CCL4, CCR1, CXCL11, FCER1G, FCGR2A, FCGR3B, FGF2, FPR1, FPR2, HGF, ICAM1, IL6, IL8, IL1B, IL8RA, IL8RB, ITGAM, LCP2, PTPRC, PYY, RGS2, S100A8, S100A9, SELE, SELL, SELP, TNFRSF11B, WNT5A	29			Immune and Lymphatic System Development and Function	accumulation	accumulation of lymphatic system cells	1.62e-10	CCR1, CSF3, CXCL10, FGF2, IL8, IL11, IL1B, IL1RN, MMP3, PTX3, S100A8, S100A9, SELE, SELL	14
	Connective Tissue Disorders	arthritis	arthritis of organism	4.61e-06	CCL2, CD69, FCER1G, FCGR2A, IL6, MMP3, MMP10, PLAU, SOCS3	9			Molecular Transport	quantity	quantity of calcium	1.47e-12	C5AR1, CCL4, CCR1, CXCL11, FCER1G, FCGR2A, FCGR3B, FGF2, FPR1, FPR2, HGF, ICAM1, IL6, IL8, IL1B, IL8RA, IL8RB, ITGAM, LCP2, PTPRC, PYY, RGS2, S100A8, S100A9, SELE, SELL, SELP, TNFRSF11B, WNT5A	29			Connective Tissue Disorders	destruction	destruction of cartilage tissue	1.65e-10	FCGR2A, FGF2, IL1A, IL1B, IL1RN, OSM, TNFRSF11B	7
	Inflammatory Disease	arthritis	arthritis of animal	4.61e-06	CCL2, CD69, FCER1G, FCGR2A, IL6, MMP3, MMP10, PLAU, SOCS3	9			Vitamin and Mineral Metabolism	quantity	quantity of calcium	1.47e-12	C5AR1, CCL4, CCR1, CXCL11, FCER1G, FCGR2A, FCGR3B, FGF2, FPR1, FPR2, HGF, ICAM1, IL6, IL8, IL1B, IL8RA, IL8RB, ITGAM, LCP2, PTPRC, PYY, RGS2, S100A8, S100A9, SELE, SELL, SELP, TNFRSF11B, WNT5A	29			Skeletal and Muscular Disorders	destruction	destruction of cartilage tissue	1.65e-10	FCGR2A, FGF2, IL1A, IL1B, IL1RN, OSM, TNFRSF11B	7
	Inflammatory Disease	arthritis	arthritis of organism	4.61e-06	CCL2, CD69, FCER1G, FCGR2A, IL6, MMP3, MMP10, PLAU, SOCS3	9			Cardiovascular Disease	cardiovascular disorder	cardiovascular disorder	1.52e-12	ACSL1, ALOX5AP, CCL4, CSF3, CSF3R, DYSF, EGR1, F5, FGF2, HSD11B1, ICAM1, IL6, IL33, IL1A, IL1B, IL1RN, ITGAM, KCNJ2, LCP2, MMP3, MMP1 (includes EG:4312), NCF2, NR3C2, PDE4B, PTGES, PTGS2, RGS2, RGS5, SELE, SELP, SERPINE1, SOD2, SPP1, TFPI, TLR2, TLR4, TNFAIP3, TNFRSF11B, TNFRSF1B, ZFP36	40			Tissue Morphology	destruction	destruction of cartilage tissue	1.65e-10	FCGR2A, FGF2, IL1A, IL1B, IL1RN, OSM, TNFRSF11B	7
	Skeletal and Muscular Disorders	arthritis	arthritis of animal	4.61e-06	CCL2, CD69, FCER1G, FCGR2A, IL6, MMP3, MMP10, PLAU, SOCS3	9			Hematological System Development and Function	adhesion	adhesion of mononuclear leukocytes	1.55e-12	CCL4, CXCL11, FYB, HGF, ICAM1, IL6, IL8, IL11, IL1A, ITGAM, ITGAX, OSM, SELE, SELL, SELP, SPP1, THBS2, TLR4	18			Hematological Disease	hematological disorder	hematological disorder of mammalia	1.67e-10	CSF3, CSF3R, CXCL14, FCGR2A, HSD11B1, IL6, IL8, IL1A, IL7R, LCP2, NFE2, PTGS2, S100A9, SELE, SOCS3, SOD2, THBS2, TLR2	18
	Skeletal and Muscular Disorders	arthritis	arthritis of organism	4.61e-06	CCL2, CD69, FCER1G, FCGR2A, IL6, MMP3, MMP10, PLAU, SOCS3	9			Cell-To-Cell Signaling and Interaction	adhesion	adhesion of mononuclear leukocytes	1.55e-12	CCL4, CXCL11, FYB, HGF, ICAM1, IL6, IL8, IL11, IL1A, ITGAM, ITGAX, OSM, SELE, SELL, SELP, SPP1, THBS2, TLR4	18			Cell-To-Cell Signaling and Interaction	binding	binding of cell lines	1.78e-10	CLEC7A, CXCL10, CYR61, FCGR2A, FGF2, HGF, IL6, IL1A, IL1B, IL8RB, INHBA, OSM, PYY, SELE, SELL, SERPINE1, SPP1, TNC	18
	Gene Expression	transactivation	transactivation	4.61e-06	CAV1, CD86, DDX58, FLI1, HGF, IGFBP5, IL6, IL11, INHBA, LOX, MDFIC, MMP3, NR3C1, PSCDBP, PTGS2, RGS18, RUNX2, SOCS3	18			Immune and Lymphatic System Development and Function	adhesion	adhesion of mononuclear leukocytes	1.55e-12	CCL4, CXCL11, FYB, HGF, ICAM1, IL6, IL8, IL11, IL1A, ITGAM, ITGAX, OSM, SELE, SELL, SELP, SPP1, THBS2, TLR4	18			Cell Signaling	quantity	quantity of Ca2+	1.88e-10	C5AR1, CCL4, CCL8, CCR1, CXCL10, CXCL11, FGF2, FPR1, FPR2, HGF, IL6, IL8, IL1B, IL8RB, PROK2, PTPRC, PYY, RGS1	18
	Immune and Lymphatic System Development and Function	binding	binding of leukocytes	4.93e-06	CCL2, CCL4, CD86, FCGR2A, FYB, HGF, S100A9, SELE, TNC	9			Hematological System Development and Function	accumulation	accumulation of blood cells	1.6e-12	CCR1, CR1, CSF3, EGR1, FGF2, ICAM1, IL8, IL11, IL1B, IL1RN, ITGAM, MMP3, PTX3, S100A8, S100A9, SELE, SELL, SELP, TLR4	19			Molecular Transport	quantity	quantity of Ca2+	1.88e-10	C5AR1, CCL4, CCL8, CCR1, CXCL10, CXCL11, FGF2, FPR1, FPR2, HGF, IL6, IL8, IL1B, IL8RB, PROK2, PTPRC, PYY, RGS1	18
	Hematological System Development and Function	binding	binding of leukocytes	4.93e-06	CCL2, CCL4, CD86, FCGR2A, FYB, HGF, S100A9, SELE, TNC	9			Tissue Development	accumulation	accumulation of blood cells	1.6e-12	CCR1, CR1, CSF3, EGR1, FGF2, ICAM1, IL8, IL11, IL1B, IL1RN, ITGAM, MMP3, PTX3, S100A8, S100A9, SELE, SELL, SELP, TLR4	19			Vitamin and Mineral Metabolism	quantity	quantity of Ca2+	1.88e-10	C5AR1, CCL4, CCL8, CCR1, CXCL10, CXCL11, FGF2, FPR1, FPR2, HGF, IL6, IL8, IL1B, IL8RB, PROK2, PTPRC, PYY, RGS1	18
	Cell-To-Cell Signaling and Interaction	binding	binding of leukocytes	4.93e-06	CCL2, CCL4, CD86, FCGR2A, FYB, HGF, S100A9, SELE, TNC	9			Cellular Growth and Proliferation	proliferation	proliferation of cell lines	1.71e-12	AIM2, BCL6, CLEC7A, CSF3, CSF2RB, CSF3R, EGR1, FGF2, FPR2, FST, HCK, HGF, HSD11B1, IGFBP5, IL6, IL8, IL11, IL13RA2, IL1A, IL1B, IL7R, IL8RA, IL8RB, INHBA, KLK6, NFE2, OSM, PAPPA, PDGFD, PTGES, PTGS2, PTPRC, PTX3, S100A8, S100A9, SERPINB2, SERPINE1, SOCS3, SOD2, SPP1, TFPI2, TNFRSF1B, TNFSF13B, WNT5A	44			Cellular Movement	invasion	invasion of cells	1.9e-10	CHI3L1, CSF3, CXCL10, FGF2, FST, GBP1 (includes EG:2633), HGF, IL8, IL1B, INHBA, MMP3, MMP1 (includes EG:4312), NRCAM, OSM, PAPPA, PTGS2, SOD2, SPP1, TFPI2, THBS2, TWIST1, WNT5A	22
	Hematological Disease	hematological disorder	hematological disorder of rodents	5.14e-06	ABCA1, FCER1G, FCGR2A, IL6, IL7R, LCP2, PLAT, PTGS1, PTGS2, S100A9, SELE, SOCS3	12			Cell-To-Cell Signaling and Interaction	communication	communication of cells	1.72e-12	CCL4, CCR1, CD14, CLEC7A, CXCL5, CXCL6, CXCL11, CXCL14, EREG, FGF2, IL6, IL1B, INHBA, ITGAM, LILRB2, MME, NAMPT, OSM, PYY, S100A9, STC1, TLR2, TLR4, TNFAIP6, TREM1, WNT5A	26			Cancer	invasion	invasion of cells	1.9e-10	CHI3L1, CSF3, CXCL10, FGF2, FST, GBP1 (includes EG:2633), HGF, IL8, IL1B, INHBA, MMP3, MMP1 (includes EG:4312), NRCAM, OSM, PAPPA, PTGS2, SOD2, SPP1, TFPI2, THBS2, TWIST1, WNT5A	22
	Cellular Development	differentiation	differentiation of connective tissue cells	5.14e-06	CCL2, FCER1G, IL6, IL11, INHBA, MMP3, PLAU, RUNX2, SOCS3, STC1, TNFRSF11B, WNT5A	12			Connective Tissue Disorders	destruction	destruction of connective tissue	1.94e-12	FCGR1A, FCGR2A, FGF2, IL6, IL8, IL1A, IL1B, IL1RN, OSM, TNFRSF11B	10			Hematological System Development and Function	accumulation	accumulation of phagocytes	2.49e-10	CCR1, CSF3, CXCL10, FGF2, IL8, IL1B, IL1RN, MMP3, PTX3, S100A8, S100A9	11
	Hematological Disease	thrombosis	thrombosis of artery	5.27e-06	PLAU, SERPINE1, TFPI, THBD	4			Tissue Morphology	destruction	destruction of connective tissue	1.94e-12	FCGR1A, FCGR2A, FGF2, IL6, IL8, IL1A, IL1B, IL1RN, OSM, TNFRSF11B	10			Tissue Development	accumulation	accumulation of phagocytes	2.49e-10	CCR1, CSF3, CXCL10, FGF2, IL8, IL1B, IL1RN, MMP3, PTX3, S100A8, S100A9	11
	Cardiovascular Disease	thrombosis	thrombosis of artery	5.27e-06	PLAU, SERPINE1, TFPI, THBD	4			Tissue Development	accumulation	accumulation of cells	2.29e-12	CCR1, CR1, CSF3, EGR1, FGF2, HGF, ICAM1, IL6, IL8, IL11, IL1B, IL1RN, ITGAM, MMP3, OSM, PTX3, S100A8, S100A9, SELE, SELL, SELP, TLR4	22			Cellular Movement	infiltration	infiltration of blood cells	2.64e-10	CCL4, CCR1, CSF3, CXCL10, FPR2, HGF, IL6, IL8, IL1B, IL8RB, OSM, PTGS2, SELE, SELL, SOCS3, SPP1, TLR2	17
	Organismal Injury and Abnormalities	lysis	lysis of blood clot	5.27e-06	PLAT, PLAU, SERPINE1, THBD	4			Cellular Function and Maintenance	engulfment	engulfment of cells	2.29e-12	CD93, CLEC7A, CR1, CSF3, CSF2RB, CSF3R, FCER1G, FCGR1A, FCGR2A, FCGR3B, FGR, HCK, ICAM1, IL1A, ITGAM, PTX3, TLR2, TLR4, TREM1	19			Cellular Development	development	development of cells	3.24e-10	BASP1, BCL6, CCL4, CCL8, CD69, CSF3, CSF3R, CXCL11, CYR61, DKK1, FCGR2A, FGF2, FST, HGF, IL6, IL8, IL11, IL1A, IL1B, IL1RN, IL7R, IL8RB, INHBA, LCP2, OSM, PTPRC, SELL, SOCS3, SPP1, STC1, THBS2, TNC, TNFRSF11B, VCAN	34
	Cellular Movement	infiltration	infiltration of cells	5.28e-06	CCL2, CCL4, CD86, FCER1G, HGF, IL6, LCP2, PLAT, PLAU, PTGS2, SELE, SOCS3	12			Cell-To-Cell Signaling and Interaction	signaling	signaling of cells	3.83e-12	CCL4, CCR1, CD14, CLEC7A, CXCL5, CXCL6, CXCL11, CXCL14, EREG, IL6, IL1B, INHBA, ITGAM, LILRB2, MME, NAMPT, OSM, PYY, S100A9, STC1, TLR2, TLR4, TNFAIP6, TREM1, WNT5A	25			Immune Response	infiltration	infiltration of leukocytes	3.38e-10	CCL4, CCR1, CSF3, CXCL10, FPR2, IL6, IL8, IL1B, IL8RB, OSM, PTGS2, SELE, SELL, SOCS3, SPP1, TLR2	16
	Connective Tissue Disorders	juvenile rheumatoid arthritis	juvenile rheumatoid arthritis	5.33e-06	CCL4, CD69, CD86, MME, PTGS1, PTGS2, S100A9, TLR1	8			Cell Death	cell death	cell death of eukaryotic cells	3.9e-12	AIM2, ANPEP, BCL6, BCL2A1, CASP4, CCL4, CD14, CDX2, CR1, CSF3, CSF2RB, CYP26B1, DUSP1, EGR1, FAP, FCER1G, FCGR1A, FGF2, FGR, FST, GADD45B, GNLY, GPR65, HGF, HLA-DRB4, ICAM1, IGFBP5, IL6, IL8, IL11, IL24, IL1A, IL1B, IL1RN, IL7R, INDO, INHBA, ITGAM, LILRB1, MME, MMP3, MMP1 (includes EG:4312), NAMPT, NCF2, NFIL3, PTGES, PTGS2, PTPRC, PYY, S100A8, S100A9, SERPINE1, SFRP2, SOCS3, SOD2, SPP1, THBS2, T…	66			Cellular Movement	infiltration	infiltration of leukocytes	3.38e-10	CCL4, CCR1, CSF3, CXCL10, FPR2, IL6, IL8, IL1B, IL8RB, OSM, PTGS2, SELE, SELL, SOCS3, SPP1, TLR2	16
	Inflammatory Disease	juvenile rheumatoid arthritis	juvenile rheumatoid arthritis	5.33e-06	CCL4, CD69, CD86, MME, PTGS1, PTGS2, S100A9, TLR1	8			Cellular Development	developmental process	developmental process of leukocytes	5.14e-12	BCL6, C5AR1, CCR1, CD14, CSF3, CSF2RB, CSF3R, CXCL11, EGR1, FCER1G, FCGR2A, HLA-DQA1, ICAM1, IL6, IL8, IL33, IL13RA2, IL1A, IL1B, IL7R, INHBA, ITGAM, LCP2, OSM, PTGS2, PTPRC, RHOH, SOCS3, TLR4, TNFRSF11B, TNFSF13B, TREM1, ZFP36	33			Hematological System Development and Function	infiltration	infiltration of leukocytes	3.38e-10	CCL4, CCR1, CSF3, CXCL10, FPR2, IL6, IL8, IL1B, IL8RB, OSM, PTGS2, SELE, SELL, SOCS3, SPP1, TLR2	16
	Skeletal and Muscular Disorders	juvenile rheumatoid arthritis	juvenile rheumatoid arthritis	5.33e-06	CCL4, CD69, CD86, MME, PTGS1, PTGS2, S100A9, TLR1	8			Immunological Disease	cell death	cell death of lymphatic system cells	5.91e-12	ANPEP, BCL2A1, CASP4, CCL4, CD14, CSF3, EGR1, GADD45B, HLA-DRB4, ICAM1, IL6, IL8, IL11, IL1B, IL1RN, IL7R, INDO, ITGAM, LILRB1, NAMPT, PTPRC, SOD2, SPP1, THBS2, TLR2, TLR4, TNFRSF1B, TNFSF13B	28			Cellular Growth and Proliferation	formation	formation of connective tissue cells	3.41e-10	FGF2, FST, HGF, IL6, IL11, IL1A, IL1B, INHBA, PTGS2, SOCS3, TNFRSF11B	11
	Immunological Disease	juvenile rheumatoid arthritis	juvenile rheumatoid arthritis	5.33e-06	CCL4, CD69, CD86, MME, PTGS1, PTGS2, S100A9, TLR1	8			Cell Death	cell death	cell death of lymphatic system cells	5.91e-12	ANPEP, BCL2A1, CASP4, CCL4, CD14, CSF3, EGR1, GADD45B, HLA-DRB4, ICAM1, IL6, IL8, IL11, IL1B, IL1RN, IL7R, INDO, ITGAM, LILRB1, NAMPT, PTPRC, SOD2, SPP1, THBS2, TLR2, TLR4, TNFRSF1B, TNFSF13B	28			Hematological System Development and Function	accumulation	accumulation of blood cells	4.17e-10	CCR1, CSF3, CXCL10, FGF2, IL8, IL11, IL1B, IL1RN, MMP3, PTX3, S100A8, S100A9, SELE, SELL	14
	Connective Tissue Disorders	rheumatic disease	rheumatic disease of rodents	5.47e-06	CCL2, CD69, FCER1G, FCGR2A, IL6, MMP3, MMP10, PLAU, SOCS3	9			Hematological System Development and Function	accumulation	accumulation of phagocytes	6.07e-12	CCR1, CR1, CSF3, FGF2, IL8, IL1B, IL1RN, ITGAM, MMP3, PTX3, S100A8, S100A9, SELP, TLR4	14			Tissue Development	accumulation	accumulation of blood cells	4.17e-10	CCR1, CSF3, CXCL10, FGF2, IL8, IL11, IL1B, IL1RN, MMP3, PTX3, S100A8, S100A9, SELE, SELL	14
	Inflammatory Disease	rheumatic disease	rheumatic disease of rodents	5.47e-06	CCL2, CD69, FCER1G, FCGR2A, IL6, MMP3, MMP10, PLAU, SOCS3	9			Tissue Development	accumulation	accumulation of phagocytes	6.07e-12	CCR1, CR1, CSF3, FGF2, IL8, IL1B, IL1RN, ITGAM, MMP3, PTX3, S100A8, S100A9, SELP, TLR4	14			Cell Signaling	flux	flux of calcium	4.84e-10	CCL4, CCR1, CXCL5, CXCL10, FCGR2A, FCGR3B, FGF2, FPR1, FPR2, IL6, IL8, IL1B, LCP2, LILRB1, MMP1 (includes EG:4312), TLR2	16
	Skeletal and Muscular Disorders	rheumatic disease	rheumatic disease of rodents	5.47e-06	CCL2, CD69, FCER1G, FCGR2A, IL6, MMP3, MMP10, PLAU, SOCS3	9			Cancer	apoptosis	apoptosis of tumor cell lines	8.37e-12	AIM2, BCL6, BCL2A1, CASP4, CDX2, CSF2RB, DUSP1, EGR1, FAP, FGF2, FGR, FST, GADD45B, GNLY, GPR65, HGF, IGFBP5, IL6, IL8, IL24, IL1A, IL1B, INHBA, ITGAM, MME, NFIL3, PTGS2, PTPRC, S100A8, S100A9, SFRP2, SOCS3, SOD2, SPP1, TLR2, TLR4, TNFAIP3, TNFRSF10C, TNFRSF11B, TNFRSF1B, TNFSF13B, TWIST1, TYMP	43			Molecular Transport	flux	flux of calcium	4.84e-10	CCL4, CCR1, CXCL5, CXCL10, FCGR2A, FCGR3B, FGF2, FPR1, FPR2, IL6, IL8, IL1B, LCP2, LILRB1, MMP1 (includes EG:4312), TLR2	16
	Cellular Movement	migration	migration of tumor cell lines	5.53e-06	CAV1, CCL2, HGF, IGFBP5, IL6, LOX, MME, MMP3, PLAU, SDC2, SERPINE1, SOCS3, WNT5A	13			Cell Death	apoptosis	apoptosis of tumor cell lines	8.37e-12	AIM2, BCL6, BCL2A1, CASP4, CDX2, CSF2RB, DUSP1, EGR1, FAP, FGF2, FGR, FST, GADD45B, GNLY, GPR65, HGF, IGFBP5, IL6, IL8, IL24, IL1A, IL1B, INHBA, ITGAM, MME, NFIL3, PTGS2, PTPRC, S100A8, S100A9, SFRP2, SOCS3, SOD2, SPP1, TLR2, TLR4, TNFAIP3, TNFRSF10C, TNFRSF11B, TNFRSF1B, TNFSF13B, TWIST1, TYMP	43			Vitamin and Mineral Metabolism	flux	flux of calcium	4.84e-10	CCL4, CCR1, CXCL5, CXCL10, FCGR2A, FCGR3B, FGF2, FPR1, FPR2, IL6, IL8, IL1B, LCP2, LILRB1, MMP1 (includes EG:4312), TLR2	16
	Cancer	migration	migration of tumor cell lines	5.53e-06	CAV1, CCL2, HGF, IGFBP5, IL6, LOX, MME, MMP3, PLAU, SDC2, SERPINE1, SOCS3, WNT5A	13			Cancer	malignant tumor	malignant tumor	9.17e-12	AIM2, ANPEP, BCL6, CASP4, CD14, CDX2, CHRDL2, COL12A1, COL7A1, CSF2RB, CSF3R, CST7, CXCL14, DUSP1, EGR1, FGF2, FRZB, GADD45B, GAS1, GBP2, GPR65, HGF, HLA-DRB4, HOXD11, HSD11B1, IFI44L, IFIT3, IGFBP5, IL6, IL13RA2, IL1A, IL1B, IL1RN, IL8RB, INHBA, KCNJ2, MME, MMP3, PLCB4, PTGES, PTGS2, PTPRC, RGS5, RNF144B, S100A8, S100A9, SFRP2, SLC16A4, SOCS3, SPP1, TFPI2, TMEM97, TNC, TNFRSF1B, TWIST1, WFDC2, W…	57			Cellular Growth and Proliferation	formation	formation of osteocytes	5.04e-10	FGF2, FST, IL6, IL11, IL1A, IL1B, INHBA, PTGS2, SOCS3, TNFRSF11B	10
	Cellular Growth and Proliferation	proliferation	proliferation of muscle cells	6.28e-06	CAV1, CCL2, HGF, IGFBP5, IL6, PLAT, PLAU, PTGS2, SERPINE1, THBD	10			Hematological System Development and Function	binding	binding of granulocytes	9.76e-12	FCGR2A, FCGR3B, FGR, HCK, ICAM1, IL8, ITGAM, S100A9, SELE, SELL, SELP, TLR4	12			Cellular Growth and Proliferation	growth	growth of eukaryotic cells	5.04e-10	BCL6, C5AR1, CCL4, CSF3, CSF3R, CXCL10, CYR61, EREG, FGF2, FST, HGF, IL6, IL8, IL11, IL24, IL13RA2, IL1A, IL1B, IL1RN, IL7R, IL8RB, INHBA, LCP2, NRCAM, OSM, PRRX1, PTGS2, SERPINE1, SOCS3, SOD2, SPP1, THBS2, TNFAIP6, WNT5A	34
	Skeletal and Muscular System Development and Function	proliferation	proliferation of muscle cells	6.28e-06	CAV1, CCL2, HGF, IGFBP5, IL6, PLAT, PLAU, PTGS2, SERPINE1, THBD	10			Hematological System Development and Function	binding	binding of myeloid cells	9.76e-12	FCGR2A, FCGR3B, FGR, HCK, ICAM1, IL8, ITGAM, S100A9, SELE, SELL, SELP, TLR4	12			Hematological Disease	hematological disorder	hematological disorder of mice	5.33e-10	CSF3, CSF3R, CXCL14, FCGR2A, HSD11B1, IL6, IL8, IL7R, LCP2, NFE2, PTGS2, S100A9, SELE, SOCS3, SOD2, THBS2, TLR2	17
	Cellular Movement	movement	movement of tumor cell lines	6.36e-06	CAV1, CCL2, HGF, IGFBP5, IL6, LOX, MME, MMP3, PLAU, SDC2, SERPINE1, SOCS3, WNT5A	13			Cell-To-Cell Signaling and Interaction	binding	binding of granulocytes	9.76e-12	FCGR2A, FCGR3B, FGR, HCK, ICAM1, IL8, ITGAM, S100A9, SELE, SELL, SELP, TLR4	12			Cellular Growth and Proliferation	formation	formation of eukaryotic cells	6.04e-10	FGF2, FST, HGF, IL6, IL8, IL11, IL1A, IL1B, INHBA, LCP2, NFE2, PAPPA, PTGS2, SELE, SERPINE1, SOCS3, TNFRSF11B	17
	Cancer	movement	movement of tumor cell lines	6.36e-06	CAV1, CCL2, HGF, IGFBP5, IL6, LOX, MME, MMP3, PLAU, SDC2, SERPINE1, SOCS3, WNT5A	13			Cell-To-Cell Signaling and Interaction	binding	binding of myeloid cells	9.76e-12	FCGR2A, FCGR3B, FGR, HCK, ICAM1, IL8, ITGAM, S100A9, SELE, SELL, SELP, TLR4	12			Immune Response	cell movement	cell movement of lymphocytes	6.5e-10	CCL4, CCL8, CCR1, CXCL10, CXCL11, GNLY, IL6, IL8, IL1B, RGS1, SELE, SELL, SOCS3, SPP1, THBS2	15
	Connective Tissue Disorders	rheumatic disease	rheumatic disease of mammalia	6.6e-06	CCL2, CD69, FCER1G, FCGR2A, IL6, MMP3, MMP10, PLAU, SOCS3	9			Immune and Lymphatic System Development and Function	binding	binding of granulocytes	9.76e-12	FCGR2A, FCGR3B, FGR, HCK, ICAM1, IL8, ITGAM, S100A9, SELE, SELL, SELP, TLR4	12			Cellular Movement	cell movement	cell movement of lymphocytes	6.5e-10	CCL4, CCL8, CCR1, CXCL10, CXCL11, GNLY, IL6, IL8, IL1B, RGS1, SELE, SELL, SOCS3, SPP1, THBS2	15
	Inflammatory Disease	rheumatic disease	rheumatic disease of mammalia	6.6e-06	CCL2, CD69, FCER1G, FCGR2A, IL6, MMP3, MMP10, PLAU, SOCS3	9			Immune and Lymphatic System Development and Function	binding	binding of myeloid cells	9.76e-12	FCGR2A, FCGR3B, FGR, HCK, ICAM1, IL8, ITGAM, S100A9, SELE, SELL, SELP, TLR4	12			Hematological System Development and Function	cell movement	cell movement of lymphocytes	6.5e-10	CCL4, CCL8, CCR1, CXCL10, CXCL11, GNLY, IL6, IL8, IL1B, RGS1, SELE, SELL, SOCS3, SPP1, THBS2	15
	Connective Tissue Disorders	connective tissue disorder	connective tissue disorder of rodents	7.03e-06	CCL2, CD69, FCER1G, FCGR2A, IL6, MMP3, MMP10, PLAU, SOCS3	9			Inflammatory Disease	arthritis	arthritis of animal	1.1e-11	ALOX5AP, C5AR1, CR1, CSF3, DUSP1, FCER1G, FCGR1A, FCGR2A, IL6, IL1A, IL1B, IL1RN, MMP3, SOCS3, TLR2, TNFRSF1B, ZFP36	17			Cellular Growth and Proliferation	proliferation	proliferation of lymphatic system cells	6.66e-10	BCL6, CCL4, CSF3, CSF3R, DKK1, FGF2, HGF, IL6, IL11, IL18RAP, IL1A, IL1B, IL7R, INDO, INHBA, LCP2, LILRB1, MMP3, NFE2, PTGS2, PTPRC, SOCS3, SPP1, TLR2	24
	Cardiovascular System Development and Function	development	development of blood vessel	7.06e-06	CAV1, CCL2, CXCL6, HGF, IL6, INHBA, LOX, PDPN, PLAT, PLAU, PTGS2, QKI (includes EG:9444), SERPINE1, SOCS3	14			Inflammatory Disease	arthritis	arthritis of organism	1.1e-11	ALOX5AP, C5AR1, CR1, CSF3, DUSP1, FCER1G, FCGR1A, FCGR2A, IL6, IL1A, IL1B, IL1RN, MMP3, SOCS3, TLR2, TNFRSF1B, ZFP36	17			Hematological System Development and Function	adhesion	adhesion of mononuclear leukocytes	9.17e-10	CCL4, CXCL11, HGF, IL6, IL8, IL11, IL1A, OSM, RGS1, SELE, SELL, SPP1, THBS2	13
	Hematological Disease	hematological disorder	hematological disorder of mammalia	7.38e-06	ABCA1, FCER1G, FCGR2A, IL6, IL7R, LCP2, PLAT, PTGS1, PTGS2, S100A9, SELE, SOCS3	12			Connective Tissue Disorders	arthritis	arthritis of animal	1.1e-11	ALOX5AP, C5AR1, CR1, CSF3, DUSP1, FCER1G, FCGR1A, FCGR2A, IL6, IL1A, IL1B, IL1RN, MMP3, SOCS3, TLR2, TNFRSF1B, ZFP36	17			Cell-To-Cell Signaling and Interaction	adhesion	adhesion of mononuclear leukocytes	9.17e-10	CCL4, CXCL11, HGF, IL6, IL8, IL11, IL1A, OSM, RGS1, SELE, SELL, SPP1, THBS2	13
	Cellular Development	morphogenesis	morphogenesis of cells	7.4e-06	ANTXR1, CCL2, CCL4, CCL8, EDNRB, FCGR2A, HGF, IL6, PDPN, PLAU, RDX, ROBO1, RUNX2, STC1, TNC, WIPF1	16			Connective Tissue Disorders	arthritis	arthritis of organism	1.1e-11	ALOX5AP, C5AR1, CR1, CSF3, DUSP1, FCER1G, FCGR1A, FCGR2A, IL6, IL1A, IL1B, IL1RN, MMP3, SOCS3, TLR2, TNFRSF1B, ZFP36	17			Immune and Lymphatic System Development and Function	adhesion	adhesion of mononuclear leukocytes	9.17e-10	CCL4, CXCL11, HGF, IL6, IL8, IL11, IL1A, OSM, RGS1, SELE, SELL, SPP1, THBS2	13
	Cell Morphology	morphogenesis	morphogenesis of cells	7.4e-06	ANTXR1, CCL2, CCL4, CCL8, EDNRB, FCGR2A, HGF, IL6, PDPN, PLAU, RDX, ROBO1, RUNX2, STC1, TNC, WIPF1	16			Skeletal and Muscular Disorders	arthritis	arthritis of animal	1.1e-11	ALOX5AP, C5AR1, CR1, CSF3, DUSP1, FCER1G, FCGR1A, FCGR2A, IL6, IL1A, IL1B, IL1RN, MMP3, SOCS3, TLR2, TNFRSF1B, ZFP36	17			Cellular Growth and Proliferation	proliferation	proliferation of tumor cell lines	1e-09	AIM2, BCL6, CSF3, CYR61, FGF2, FST, HGF, HSD11B1, IL6, IL8, IL11, IL1A, IL1B, IL8RB, INHBA, NFE2, OSM, PTGS2, SERPINE1, SOCS3, SOD2, SPP1, TFPI2, VCAN, WNT5A	25
	Organismal Development	development	development of vessel	7.43e-06	CAV1, CCL2, CXCL6, HGF, IL6, INHBA, LOX, PDPN, PLAT, PLAU, PTGS2, QKI (includes EG:9444), SERPINE1, SOCS3	14			Skeletal and Muscular Disorders	arthritis	arthritis of organism	1.1e-11	ALOX5AP, C5AR1, CR1, CSF3, DUSP1, FCER1G, FCGR1A, FCGR2A, IL6, IL1A, IL1B, IL1RN, MMP3, SOCS3, TLR2, TNFRSF1B, ZFP36	17			Cancer	proliferation	proliferation of tumor cell lines	1e-09	AIM2, BCL6, CSF3, CYR61, FGF2, FST, HGF, HSD11B1, IL6, IL8, IL11, IL1A, IL1B, IL8RB, INHBA, NFE2, OSM, PTGS2, SERPINE1, SOCS3, SOD2, SPP1, TFPI2, VCAN, WNT5A	25
	Connective Tissue Disorders	connective tissue disorder	connective tissue disorder of mammalia	8.33e-06	CCL2, CD69, FCER1G, FCGR2A, IL6, MMP3, MMP10, PLAU, SOCS3	9			Cancer	cell death	cell death of tumor cell lines	1.38e-11	AIM2, BCL6, BCL2A1, CASP4, CDX2, CSF2RB, DUSP1, EGR1, FAP, FGF2, FGR, FST, GADD45B, GNLY, GPR65, HGF, HLA-DRB4, IGFBP5, IL6, IL8, IL24, IL1A, IL1B, IL1RN, INHBA, ITGAM, MME, NAMPT, NFIL3, PTGS2, PTPRC, S100A8, S100A9, SFRP2, SOCS3, SOD2, SPP1, TLR2, TLR4, TNFAIP3, TNFRSF10C, TNFRSF11B, TNFRSF1B, TNFSF13B, TWIST1, TYMP	46			Organismal Injury and Abnormalities	cytosis	cytosis of mice	1.05e-09	CSF3, CSF3R, IL6, IL8, MME, NFE2, S100A9, SELE, SOCS3, TLR2	10
	Cell-To-Cell Signaling and Interaction	attachment	attachment of cells	8.33e-06	CSF2RB, EMR2, LOX, PLAU, SELE, SERPINE1, TFPI2, VCAN	8			Cell Death	cell death	cell death of tumor cell lines	1.38e-11	AIM2, BCL6, BCL2A1, CASP4, CDX2, CSF2RB, DUSP1, EGR1, FAP, FGF2, FGR, FST, GADD45B, GNLY, GPR65, HGF, HLA-DRB4, IGFBP5, IL6, IL8, IL24, IL1A, IL1B, IL1RN, INHBA, ITGAM, MME, NAMPT, NFIL3, PTGS2, PTPRC, S100A8, S100A9, SFRP2, SOCS3, SOD2, SPP1, TLR2, TLR4, TNFAIP3, TNFRSF10C, TNFRSF11B, TNFRSF1B, TNFSF13B, TWIST1, TYMP	46			Cellular Development	developmental process	developmental process of mononuclear leukocytes	1.06e-09	BCL6, C5AR1, CD69, CSF3, CSF3R, CXCL11, DKK1, FCGR2A, IL6, IL8, IL13RA2, IL1A, IL1B, IL7R, INHBA, LCP2, OSM, PTGS2, PTPRC, SOCS3, TNFRSF11B, TREM1	22
	Hematological Disease	hemorrhage	hemorrhage	8.33e-06	ABCA1, FCGR2A, INHBA, LCP2, PLAT, PTGS1, PTGS2, SELE	8			Immune Response	inflammation	inflammation of organ	1.4e-11	BCL6, C5AR1, CCL4, CD14, EGR1, FCGR2A, ICAM1, IL6, IL1B, MME, PTGS2, SOD2, THBS2, TLR4, TLR8, TNFRSF1B, TNFSF13B, TREM1	18			Respiratory Disease	respiratory disorder	respiratory disorder	1.16e-09	ACSL1, CHI3L1, CLEC4E, CSF3, CXCL10, CXCL11, F5, FPR1, IL6, IL8, IL33, IL8RB, MNDA, NFE2, PDE4B, PTGS2, PTX3, S100A9, S100A12, SLC2A3, SPP1, TLR2, TREM1	23
	Tissue Development	formation	formation of connective tissue	8.33e-06	FST, IGFBP5, IL6, IL11, PTGS1, PTGS2, RUNX2, STC1	8			Immune Response	activation	activation of macrophages	1.91e-11	CCL4, CD14, CD93, CSF3, HCK, ICAM1, IL6, IL8, IL1B, LY96, PTGES, PTGS2, SLC11A1, TLR4, TREM1	15			Cellular Growth and Proliferation	formation	formation of cells	1.17e-09	FGF2, FST, HGF, IL6, IL8, IL11, IL1A, IL1B, INHBA, LCP2, NFE2, PAPPA, PTGS2, SELE, SERPINE1, SOCS3, TNFRSF11B	17
	Cell Morphology	shape change	shape change	8.47e-06	ANTXR1, CCL2, CCL4, CCL8, EDNRB, FCGR2A, FST, HGF, IL6, INHBA, PLAT, PLAU, ROBO1, RUNX2, TNC, WIPF1	16			Hematological System Development and Function	activation	activation of macrophages	1.91e-11	CCL4, CD14, CD93, CSF3, HCK, ICAM1, IL6, IL8, IL1B, LY96, PTGES, PTGS2, SLC11A1, TLR4, TREM1	15			Cell Death	cell death	cell death of eukaryotic cells	1.18e-09	AIM2, BCL6, BCL2A1, CCL4, CD69, CSF3, CYP26B1, CYR61, DKK1, FAP, FGF2, FST, GNLY, HGF, IL6, IL8, IL11, IL24, IL1A, IL1B, IL1RN, IL7R, INDO, INHBA, LILRB1, MME, MMP3, MMP1 (includes EG:4312), NAMPT, NCF2, PTGS2, PTPRC, PYY, S100A8, S100A9, SERPINE1, SOCS3, SOD2, SPP1, THBS2, TLR2, TNFRSF10C, TNFRSF11B, TWIST1, VCAN	45
	Endocrine System Disorders	diabetic retinopathy	diabetic retinopathy	8.56e-06	HGF, NR3C1, PTGS1, PTGS2	4			Cell-To-Cell Signaling and Interaction	activation	activation of macrophages	1.91e-11	CCL4, CD14, CD93, CSF3, HCK, ICAM1, IL6, IL8, IL1B, LY96, PTGES, PTGS2, SLC11A1, TLR4, TREM1	15			Organismal Injury and Abnormalities	cytosis	cytosis	1.2e-09	CSF3, CSF3R, IL6, IL8, IL1B, MME, NFE2, PDE4B, S100A9, SELE, SELL, SOCS3, TLR2	13
	Metabolic Disease	diabetic retinopathy	diabetic retinopathy	8.56e-06	HGF, NR3C1, PTGS1, PTGS2	4			Immune and Lymphatic System Development and Function	activation	activation of macrophages	1.91e-11	CCL4, CD14, CD93, CSF3, HCK, ICAM1, IL6, IL8, IL1B, LY96, PTGES, PTGS2, SLC11A1, TLR4, TREM1	15			Cell Death	apoptosis	apoptosis of eukaryotic cells	1.2e-09	AIM2, BCL6, BCL2A1, CCL4, CD69, CSF3, CYP26B1, CYR61, DKK1, FAP, FGF2, FST, GNLY, HGF, IL6, IL8, IL11, IL24, IL1A, IL1B, IL1RN, IL7R, INHBA, LILRB1, MME, MMP3, NAMPT, PTGS2, PTPRC, S100A8, S100A9, SERPINE1, SOCS3, SOD2, SPP1, THBS2, TLR2, TNFRSF10C, TNFRSF11B, TWIST1, VCAN	41
	Neurological Disease	diabetic retinopathy	diabetic retinopathy	8.56e-06	HGF, NR3C1, PTGS1, PTGS2	4			Immunological Disease	hypersensitive reaction	hypersensitive reaction	2.79e-11	CCL4, CCR1, DUSP1, FCER1G, FCGR1A, FCGR2A, HLA-DQA1, ICAM1, IL8, IL1RN, LCP2, MMP3, OSM, PDE4B, SELP, SOCS3, SPP1, TLR4, TNFAIP3, ZFP36	20			Cell Signaling	release	release of calcium	1.37e-09	CCL4, FCGR2A, FPR1, IL6, IL8, IL1A, IL1B, IL8RB, OSM, PTPRC, RGS1, SPP1, TLR2, TNFRSF11B	14
	Ophthalmic Disease	diabetic retinopathy	diabetic retinopathy	8.56e-06	HGF, NR3C1, PTGS1, PTGS2	4			Cellular Movement	cell movement	cell movement of cell lines	3.28e-11	ANPEP, CCL4, CCR1, CXCL5, CXCL11, CXCL14, FGF2, FPR1, FPR2, HGF, IL6, IL8, IL8RA, IL8RB, NRCAM, OSM, PREX1, PTGS2, SELE, SELL, SELP, SERPINE1, SPP1, TLR2, WNT5A	25			Molecular Transport	release	release of calcium	1.37e-09	CCL4, FCGR2A, FPR1, IL6, IL8, IL1A, IL1B, IL8RB, OSM, PTPRC, RGS1, SPP1, TLR2, TNFRSF11B	14
	Inflammatory Disease	inflammation	inflammation of mammalia	1.01e-05	CAV1, FCER1G, IL6, IL11, PTGS1, PTGS2, THBD	7			Cell Death	cell death	cell death of blood cells	3.44e-11	ANPEP, BCL2A1, CASP4, CCL4, CD14, CSF3, EGR1, FCER1G, GADD45B, HLA-DRB4, ICAM1, IL6, IL8, IL1B, IL1RN, IL7R, INDO, ITGAM, NAMPT, PTPRC, SOD2, SPP1, THBS2, TLR2, TLR4, TNFRSF1B, TNFSF13B	27			Vitamin and Mineral Metabolism	release	release of calcium	1.37e-09	CCL4, FCGR2A, FPR1, IL6, IL8, IL1A, IL1B, IL8RB, OSM, PTPRC, RGS1, SPP1, TLR2, TNFRSF11B	14
	Immune Response	inflammation	inflammation of mammalia	1.01e-05	CAV1, FCER1G, IL6, IL11, PTGS1, PTGS2, THBD	7			Cell Death	survival	survival of blood cells	3.51e-11	BCL6, BCL2A1, CCL4, CR1, CSF3, CSF2RB, FCER1G, GADD45B, HCK, ICAM1, IL6, IL8, NCF2, NFE2, NFIL3, PROK2, SERPINB2, TNFRSF1B, TNFSF13B	19			Organismal Injury and Abnormalities	cytosis	cytosis of mammalia	1.46e-09	CSF3, CSF3R, IL6, IL8, MME, NFE2, S100A9, SELE, SOCS3, TLR2	10
	Organismal Survival	death	death of rodents	1.03e-05	ABCA1, DDX58, FCER1G, FLI1, HGF, IGFBP5, IL6, LCP2, LOX, LY96, MME, NR3C1, PLAT, PTGS1, PTGS2, ROBO1, RUNX2, SOCS3, ST8SIA4, THBD, TNFRSF11B	21			Connective Tissue Disorders	destruction	destruction of cartilage tissue	4.22e-11	FCGR1A, FCGR2A, FGF2, IL1A, IL1B, IL1RN, OSM, TNFRSF11B	8			Hematological System Development and Function	development	development of blood cells	1.58e-09	BCL6, CD69, CSF3, CSF3R, CXCL11, DKK1, FCGR2A, IL6, IL1A, IL1B, IL1RN, IL7R, LCP2, OSM, PTPRC, SOCS3, THBS2, TNFRSF11B	18
	Cellular Movement	cell movement	cell movement of macrophages	1.05e-05	CCL2, CCL4, CCL8, HGF, IL6, INHBA, PLAU, PTGS2, SELE	9			Skeletal and Muscular Disorders	destruction	destruction of cartilage tissue	4.22e-11	FCGR1A, FCGR2A, FGF2, IL1A, IL1B, IL1RN, OSM, TNFRSF11B	8			Cellular Development	development	development of blood cells	1.58e-09	BCL6, CD69, CSF3, CSF3R, CXCL11, DKK1, FCGR2A, IL6, IL1A, IL1B, IL1RN, IL7R, LCP2, OSM, PTPRC, SOCS3, THBS2, TNFRSF11B	18
	Hematological System Development and Function	cell movement	cell movement of macrophages	1.05e-05	CCL2, CCL4, CCL8, HGF, IL6, INHBA, PLAU, PTGS2, SELE	9			Tissue Morphology	destruction	destruction of cartilage tissue	4.22e-11	FCGR1A, FCGR2A, FGF2, IL1A, IL1B, IL1RN, OSM, TNFRSF11B	8			Organismal Injury and Abnormalities	leukocytosis	leukocytosis of mice	1.76e-09	CSF3, CSF3R, IL6, IL8, S100A9, SELE, SOCS3, TLR2	8
	Immune Response	cell movement	cell movement of macrophages	1.05e-05	CCL2, CCL4, CCL8, HGF, IL6, INHBA, PLAU, PTGS2, SELE	9			Organismal Survival	survival	survival of mammalia	4.56e-11	BCL6, BCL2A1, C5AR1, CCR1, CR1, CSF3, DUSP1, FST, GCA, HGF, ICAM1, IL6, IL11, IL1B, IL7R, IL8RA, IL8RB, INHBA, LY96, MME, PTGES, PTX3, SOCS3, SOSTDC1, TLR2, TLR4	26			Hematological Disease	leukocytosis	leukocytosis of mice	1.76e-09	CSF3, CSF3R, IL6, IL8, S100A9, SELE, SOCS3, TLR2	8
	Skeletal and Muscular Disorders	skeletal and muscular disorder	skeletal and muscular disorder of mice	1.1e-05	CCL2, CD69, CD86, FCER1G, FCGR2A, IL6, PLAU, RUNX2, SOCS3, TNFRSF11B	10			Immune Response	proliferation	proliferation of leukocytes	4.95e-11	BCL6, CCL4, CD14, CR1, CSF3, CSF3R, EGR1, FYB, HCK, ICAM1, IL6, IL1A, IL1B, IL7R, INDO, INHBA, ITGAM, ITGAX, LCP2, LILRB1, LY96, MMP3, PTGS2, PTPRC, RGS2, SOCS3, SPP1, TLR2, TLR4, TNFRSF1B, TNFSF13B	31			Cellular Movement	chemotaxis	chemotaxis of tumor cell lines	2.25e-09	CCL4, CCL8, CD69, CXCL5, CXCL14, FGF2, FPR1, FPR2, HGF, IL8, IL8RB, SELE	12
	Cell-To-Cell Signaling and Interaction	adhesion	adhesion of lymphatic system cells	1.1e-05	CCL2, CCL4, FYB, HGF, IL6, IL11, PLAU, S100A9, SELE, THBD	10			Hematological System Development and Function	proliferation	proliferation of leukocytes	4.95e-11	BCL6, CCL4, CD14, CR1, CSF3, CSF3R, EGR1, FYB, HCK, ICAM1, IL6, IL1A, IL1B, IL7R, INDO, INHBA, ITGAM, ITGAX, LCP2, LILRB1, LY96, MMP3, PTGS2, PTPRC, RGS2, SOCS3, SPP1, TLR2, TLR4, TNFRSF1B, TNFSF13B	31			Cancer	chemotaxis	chemotaxis of tumor cell lines	2.25e-09	CCL4, CCL8, CD69, CXCL5, CXCL14, FGF2, FPR1, FPR2, HGF, IL8, IL8RB, SELE	12
	Infectious Disease	HIV infection	HIV infection	1.1e-05	C1S, CCL2, CD86, CSF2RB, IL7R, NR3C1, PDE4B, PTGS1, PTGS2	9			Immune and Lymphatic System Development and Function	proliferation	proliferation of leukocytes	4.95e-11	BCL6, CCL4, CD14, CR1, CSF3, CSF3R, EGR1, FYB, HCK, ICAM1, IL6, IL1A, IL1B, IL7R, INDO, INHBA, ITGAM, ITGAX, LCP2, LILRB1, LY96, MMP3, PTGS2, PTPRC, RGS2, SOCS3, SPP1, TLR2, TLR4, TNFRSF1B, TNFSF13B	31			Immune Response	cell movement	cell movement of macrophages	2.32e-09	CCL4, CCL8, FPR1, FPR2, GNLY, HGF, IL6, IL1B, INHBA, PTGS2, SELE, SELL, SPP1	13
	Cell-To-Cell Signaling and Interaction	adhesion	adhesion of cell lines	1.36e-05	CCL2, CCL4, DKK3, HGF, IL6, PLAU, PSCDBP, SDC2, SELE, THBD, VCAN, ZEB1	12			Cellular Growth and Proliferation	proliferation	proliferation of leukocytes	4.95e-11	BCL6, CCL4, CD14, CR1, CSF3, CSF3R, EGR1, FYB, HCK, ICAM1, IL6, IL1A, IL1B, IL7R, INDO, INHBA, ITGAM, ITGAX, LCP2, LILRB1, LY96, MMP3, PTGS2, PTPRC, RGS2, SOCS3, SPP1, TLR2, TLR4, TNFRSF1B, TNFSF13B	31			Cellular Movement	cell movement	cell movement of macrophages	2.32e-09	CCL4, CCL8, FPR1, FPR2, GNLY, HGF, IL6, IL1B, INHBA, PTGS2, SELE, SELL, SPP1	13
	Hematological Disease	thrombosis	thrombosis of blood vessel	1.36e-05	PLAU, SERPINE1, TFPI, THBD	4			Organismal Survival	survival	survival of animal	5.11e-11	BCL6, BCL2A1, C5AR1, CCR1, CR1, CSF3, DUSP1, FST, GCA, HGF, ICAM1, IL6, IL11, IL1B, IL7R, IL8RA, IL8RB, INHBA, LY96, MME, PTGES, PTX3, SOCS3, SOSTDC1, TLR2, TLR4	26			Hematological System Development and Function	cell movement	cell movement of macrophages	2.32e-09	CCL4, CCL8, FPR1, FPR2, GNLY, HGF, IL6, IL1B, INHBA, PTGS2, SELE, SELL, SPP1	13
	Cardiovascular Disease	thrombosis	thrombosis of blood vessel	1.36e-05	PLAU, SERPINE1, TFPI, THBD	4			Organismal Survival	survival	survival of organism	5.11e-11	BCL6, BCL2A1, C5AR1, CCR1, CR1, CSF3, DUSP1, FST, GCA, HGF, ICAM1, IL6, IL11, IL1B, IL7R, IL8RA, IL8RB, INHBA, LY96, MME, PTGES, PTX3, SOCS3, SOSTDC1, TLR2, TLR4	26			Immune Response	chemotaxis	chemotaxis of T lymphocytes	2.84e-09	CCL4, CCL8, CCR1, CXCL10, CXCL11, GNLY, IL8, SOCS3, SPP1, THBS2	10
	Immune and Lymphatic System Development and Function	adhesion	adhesion of lymphocytes	1.38e-05	CCL2, CCL4, FYB, HGF, IL6, IL11, PLAU, SELE	8			Cell-To-Cell Signaling and Interaction	adhesion	adhesion of phagocytes	5.19e-11	CSF3R, ICAM1, IL8, IL1A, IL1B, IL8RB, ITGAM, ITGAX, S100A8, S100A9, SELE, SELL, SELP, TLR4	14			Cellular Movement	chemotaxis	chemotaxis of T lymphocytes	2.84e-09	CCL4, CCL8, CCR1, CXCL10, CXCL11, GNLY, IL8, SOCS3, SPP1, THBS2	10
	Hematological System Development and Function	adhesion	adhesion of lymphocytes	1.38e-05	CCL2, CCL4, FYB, HGF, IL6, IL11, PLAU, SELE	8			Tissue Morphology	destruction	destruction of tissue	5.68e-11	FCGR1A, FCGR2A, FGF2, IL6, IL8, IL1A, IL1B, IL1RN, OSM, TNFRSF11B	10			Hematological System Development and Function	chemotaxis	chemotaxis of T lymphocytes	2.84e-09	CCL4, CCL8, CCR1, CXCL10, CXCL11, GNLY, IL8, SOCS3, SPP1, THBS2	10
	Cell-To-Cell Signaling and Interaction	adhesion	adhesion of lymphocytes	1.38e-05	CCL2, CCL4, FYB, HGF, IL6, IL11, PLAU, SELE	8			Inflammatory Disease	arthritis	arthritis of rodents	5.96e-11	ALOX5AP, C5AR1, CR1, CSF3, DUSP1, FCER1G, FCGR1A, FCGR2A, IL6, IL1A, IL1B, IL1RN, MMP3, SOCS3, TNFRSF1B, ZFP36	16			Cardiovascular Disease	cardiovascular disorder	cardiovascular disorder	2.84e-09	ACSL1, CCL4, CSF3, CSF3R, F5, FGF2, HSD11B1, IL6, IL33, IL1A, IL1B, IL1RN, LCP2, MMP3, MMP1 (includes EG:4312), NCF2, PDE4B, PTGS2, RETNLB (includes EG:84666), RGS1, SELE, SERPINE1, SOD2, SPP1, TFPI, TLR2, TNFRSF11B	27
	Tissue Development	adhesion	adhesion of lymphocytes	1.38e-05	CCL2, CCL4, FYB, HGF, IL6, IL11, PLAU, SELE	8			Inflammatory Disease	inflammatory arthropathy	inflammatory arthropathy of rodents	5.96e-11	ALOX5AP, C5AR1, CR1, CSF3, DUSP1, FCER1G, FCGR1A, FCGR2A, IL6, IL1A, IL1B, IL1RN, MMP3, SOCS3, TNFRSF1B, ZFP36	16			Organismal Survival	survival	survival of mammalia	3.12e-09	BCL6, BCL2A1, C5AR1, CCR1, CSF3, CXCL10, DKK1, FST, HGF, IL6, IL11, IL1B, IL7R, IL8RB, INHBA, MME, PTX3, SOCS3, TLR2	19
	Cellular Movement	infiltration	infiltration of blood cells	1.67e-05	CCL2, CCL4, CD86, FCER1G, HGF, IL6, PLAT, PLAU, PTGS2, SELE, SOCS3	11			Connective Tissue Disorders	arthritis	arthritis of rodents	5.96e-11	ALOX5AP, C5AR1, CR1, CSF3, DUSP1, FCER1G, FCGR1A, FCGR2A, IL6, IL1A, IL1B, IL1RN, MMP3, SOCS3, TNFRSF1B, ZFP36	16			Organismal Injury and Abnormalities	leukocytosis	leukocytosis of mammalia	3.17e-09	CSF3, CSF3R, IL6, IL8, S100A9, SELE, SOCS3, TLR2	8
	Hematological System Development and Function	accumulation	accumulation of blood cells	1.76e-05	CCL2, CD86, IL11, MMP3, NR3C1, PLAT, PLAU, S100A9, SELE	9			Connective Tissue Disorders	inflammatory arthropathy	inflammatory arthropathy of rodents	5.96e-11	ALOX5AP, C5AR1, CR1, CSF3, DUSP1, FCER1G, FCGR1A, FCGR2A, IL6, IL1A, IL1B, IL1RN, MMP3, SOCS3, TNFRSF1B, ZFP36	16			Hematological Disease	leukocytosis	leukocytosis of mammalia	3.17e-09	CSF3, CSF3R, IL6, IL8, S100A9, SELE, SOCS3, TLR2	8
	Tissue Development	accumulation	accumulation of blood cells	1.76e-05	CCL2, CD86, IL11, MMP3, NR3C1, PLAT, PLAU, S100A9, SELE	9			Skeletal and Muscular Disorders	arthritis	arthritis of rodents	5.96e-11	ALOX5AP, C5AR1, CR1, CSF3, DUSP1, FCER1G, FCGR1A, FCGR2A, IL6, IL1A, IL1B, IL1RN, MMP3, SOCS3, TNFRSF1B, ZFP36	16			Immune Response	recruitment	recruitment of leukocytes	3.37e-09	C5AR1, CCL4, CCR1, CSF3, CXCL10, IL6, IL8, IL1B, IL8RB, SELE, SELL, SERPINE1	12
	Cellular Development	developmental process	developmental process of blood cells	1.87e-05	CCL2, CCL4, CD69, CD86, CSF2RB, FCER1G, FCGR2A, FLI1, HGF, IL6, IL13RA2, IL7R, INHBA, LCP2, PTGS2, RUNX2, SOCS3, TNFRSF11B	18			Skeletal and Muscular Disorders	inflammatory arthropathy	inflammatory arthropathy of rodents	5.96e-11	ALOX5AP, C5AR1, CR1, CSF3, DUSP1, FCER1G, FCGR1A, FCGR2A, IL6, IL1A, IL1B, IL1RN, MMP3, SOCS3, TNFRSF1B, ZFP36	16			Hematological System Development and Function	recruitment	recruitment of leukocytes	3.37e-09	C5AR1, CCL4, CCR1, CSF3, CXCL10, IL6, IL8, IL1B, IL8RB, SELE, SELL, SERPINE1	12
	Hematological System Development and Function	hematopoiesis	hematopoiesis	1.93e-05	CD69, CD86, CSF2RB, FCER1G, FCGR2A, FST, IL6, IL11, IL13RA2, IL7R, INHBA, LCP2, PTGS2, RUNX2, SOCS3, TNFRSF11B	16			Cellular Development	differentiation	differentiation of connective tissue cells	6.55e-11	FCER1G, FGF2, GADD45B, HSD11B1, IL6, IL8, IL11, IL1A, IL1B, INHBA, MMP3, MMP1 (includes EG:4312), OSM, RGS2, SFRP2, SOCS3, STC1, TLR2, TLR4, TNFRSF11B, TWIST2, WNT5A	22			Cell-To-Cell Signaling and Interaction	recruitment	recruitment of leukocytes	3.37e-09	C5AR1, CCL4, CCR1, CSF3, CXCL10, IL6, IL8, IL1B, IL8RB, SELE, SELL, SERPINE1	12
	Immune and Lymphatic System Development and Function	immunological process	immunological process of eukaryotic cells	2.06e-05	CCL4, ENTPD1, FCER1G, FCGR2A, FST, IL11, LCP2, PLAT, WIPF1	9			Inflammatory Disease	arthritis	arthritis of mammalia	8.97e-11	ALOX5AP, C5AR1, CR1, CSF3, DUSP1, FCER1G, FCGR1A, FCGR2A, IL6, IL1A, IL1B, IL1RN, MMP3, SOCS3, TNFRSF1B, ZFP36	16			Organismal Survival	survival	survival of animal	3.37e-09	BCL6, BCL2A1, C5AR1, CCR1, CSF3, CXCL10, DKK1, FST, HGF, IL6, IL11, IL1B, IL7R, IL8RB, INHBA, MME, PTX3, SOCS3, TLR2	19
	Immunological Disease	immunological disorder	immunological disorder of mice	2.06e-05	CCL2, CCL4, CD86, FCER1G, FCGR2A, IL6, IL7R, LCP2, NR3C1, PLAT, SOCS3, TNFRSF11B	12			Connective Tissue Disorders	arthritis	arthritis of mammalia	8.97e-11	ALOX5AP, C5AR1, CR1, CSF3, DUSP1, FCER1G, FCGR1A, FCGR2A, IL6, IL1A, IL1B, IL1RN, MMP3, SOCS3, TNFRSF1B, ZFP36	16			Organismal Survival	survival	survival of organism	3.37e-09	BCL6, BCL2A1, C5AR1, CCR1, CSF3, CXCL10, DKK1, FST, HGF, IL6, IL11, IL1B, IL7R, IL8RB, INHBA, MME, PTX3, SOCS3, TLR2	19
	Cellular Movement	migration	migration of smooth muscle cells	2.09e-05	CCL2, HGF, IGFBP5, IL6, PLAT, PLAU, PTGS2	7			Skeletal and Muscular Disorders	arthritis	arthritis of mammalia	8.97e-11	ALOX5AP, C5AR1, CR1, CSF3, DUSP1, FCER1G, FCGR1A, FCGR2A, IL6, IL1A, IL1B, IL1RN, MMP3, SOCS3, TNFRSF1B, ZFP36	16			Cellular Movement	homing	homing of tumor cell lines	3.74e-09	CCL4, CCL8, CD69, CXCL5, CXCL14, FGF2, FPR1, FPR2, HGF, IL8, IL8RB, SELE	12
	Skeletal and Muscular System Development and Function	migration	migration of smooth muscle cells	2.09e-05	CCL2, HGF, IGFBP5, IL6, PLAT, PLAU, PTGS2	7			Cell-To-Cell Signaling and Interaction	binding	binding of bone marrow cells	1.05e-10	FCGR2A, FCGR3B, FGR, HCK, ICAM1, IL8, ITGAM, S100A9, SELE, SELL, SELP, TLR4	12			Cancer	homing	homing of tumor cell lines	3.74e-09	CCL4, CCL8, CD69, CXCL5, CXCL14, FGF2, FPR1, FPR2, HGF, IL8, IL8RB, SELE	12
	Inflammatory Disease	airway hyperresponsiveness	airway hyperresponsiveness of mice	2.11e-05	CD86, HGF, IL6, IL13RA2, PLAT, SOCS3	6			Immune and Lymphatic System Development and Function	binding	binding of bone marrow cells	1.05e-10	FCGR2A, FCGR3B, FGR, HCK, ICAM1, IL8, ITGAM, S100A9, SELE, SELL, SELP, TLR4	12			Cellular Growth and Proliferation	proliferation	proliferation of connective tissue cells	3.91e-09	EREG, FGF2, HGF, IL6, IL8, IL24, IL1A, IL1B, INHBA, OSM, SOD2, SPP1, STC1, TNFRSF11B, VCAN, WNT5A	16
	Inflammatory Disease	airway hyperresponsiveness	airway hyperresponsiveness of rodents	2.11e-05	CD86, HGF, IL6, IL13RA2, PLAT, SOCS3	6			Cellular Growth and Proliferation	formation	formation of osteocytes	1.05e-10	EGR1, FGF2, FST, IL6, IL11, IL1A, IL1B, INHBA, PTGS2, SOCS3, TNFRSF11B, TNFRSF1B	12			Hematological System Development and Function	binding	binding of mononuclear leukocytes	4e-09	CCL4, CCR1, CXCL10, CXCL11, FGF2, HGF, IL8, IL1A, SELE, SELL, TNC	11
	Cell-To-Cell Signaling and Interaction	signaling	signaling of cells	2.17e-05	CCL4, CCL8, CXCL5, CXCL6, DDX58, IL6, INHBA, LILRB2, MME, S100A9, STC1, WNT5A	12			Hematological Disease	leukocytosis	leukocytosis	1.06e-10	CSF3, CSF3R, IL6, IL8, IL1B, S100A9, SELE, SELL, SELP, SOCS3, TLR2	11			Cell-To-Cell Signaling and Interaction	binding	binding of mononuclear leukocytes	4e-09	CCL4, CCR1, CXCL10, CXCL11, FGF2, HGF, IL8, IL1A, SELE, SELL, TNC	11
	Cellular Development	differentiation	differentiation of osteoclasts	2.25e-05	CCL2, FCER1G, IL6, IL11, INHBA, SOCS3, TNFRSF11B	7			Organismal Injury and Abnormalities	leukocytosis	leukocytosis	1.06e-10	CSF3, CSF3R, IL6, IL8, IL1B, S100A9, SELE, SELL, SELP, SOCS3, TLR2	11			Immune and Lymphatic System Development and Function	binding	binding of mononuclear leukocytes	4e-09	CCL4, CCR1, CXCL10, CXCL11, FGF2, HGF, IL8, IL1A, SELE, SELL, TNC	11
	Skeletal and Muscular System Development and Function	differentiation	differentiation of osteoclasts	2.25e-05	CCL2, FCER1G, IL6, IL11, INHBA, SOCS3, TNFRSF11B	7			Cellular Development	developmental process	developmental process of mononuclear leukocytes	1.08e-10	BCL6, C5AR1, CD14, CSF3, CSF3R, CXCL11, EGR1, FCER1G, FCGR2A, HLA-DQA1, ICAM1, IL6, IL8, IL13RA2, IL1A, IL1B, IL7R, INHBA, ITGAM, LCP2, OSM, PTGS2, PTPRC, RHOH, SOCS3, TLR4, TNFRSF11B, TNFSF13B, TREM1	29			Hematological System Development and Function	development	development of leukocytes	4.12e-09	BCL6, CD69, CSF3, CSF3R, CXCL11, DKK1, FCGR2A, IL6, IL1A, IL1B, IL7R, LCP2, OSM, PTPRC, SOCS3, TNFRSF11B	16
	Connective Tissue Development and Function	differentiation	differentiation of osteoclasts	2.25e-05	CCL2, FCER1G, IL6, IL11, INHBA, SOCS3, TNFRSF11B	7			Cell-To-Cell Signaling and Interaction	recruitment	recruitment of cells	1.16e-10	C5AR1, CCL4, CCR1, CSF3, FGF2, ICAM1, IL6, IL8, IL1B, IL8RB, SELE, SELL, SELP, SERPINE1, THBS2, TLR2, TLR4, TNFRSF1B	18			Cellular Development	development	development of leukocytes	4.12e-09	BCL6, CD69, CSF3, CSF3R, CXCL11, DKK1, FCGR2A, IL6, IL1A, IL1B, IL7R, LCP2, OSM, PTPRC, SOCS3, TNFRSF11B	16
	Inflammatory Disease	airway hyperresponsiveness	airway hyperresponsiveness of mammalia	2.37e-05	CD86, HGF, IL6, IL13RA2, PLAT, SOCS3	6			Hematological System Development and Function	quantity	quantity of mononuclear leukocytes	1.31e-10	BCL2A1, C5AR1, CSF3, CSF2RB, EGR1, FCER1G, FCGR1A, FCGR2A, HLA-DQA1, ICAM1, IL6, IL8, IL1A, IL7R, INHBA, ITGAM, LCP2, OSM, PROK2, PTPRC, RHOH, SELE, SELL, TLR2, TNFRSF1B, TNFSF13B	26			Organismal Injury and Abnormalities	fibrosis	fibrosis	4.59e-09	CCL8, CXCL6, CXCL10, CXCL11, HGF, IFIT3, IL6, IL11, IL13RA2, IL1RN, OSM, PDE4B, PTGS2, SERPINE1, SPP1	15
	Hematological Disease	hematological disorder	hematological disorder of mice	2.5e-05	ABCA1, FCER1G, FCGR2A, IL6, IL7R, LCP2, PTGS1, PTGS2, S100A9, SELE, SOCS3	11			Immune and Lymphatic System Development and Function	quantity	quantity of mononuclear leukocytes	1.31e-10	BCL2A1, C5AR1, CSF3, CSF2RB, EGR1, FCER1G, FCGR1A, FCGR2A, HLA-DQA1, ICAM1, IL6, IL8, IL1A, IL7R, INHBA, ITGAM, LCP2, OSM, PROK2, PTPRC, RHOH, SELE, SELL, TLR2, TNFRSF1B, TNFSF13B	26			Cellular Growth and Proliferation	proliferation	proliferation of blood cells	5.1e-09	BCL6, CCL4, CSF3, CSF3R, FGF2, HGF, IL6, IL8, IL11, IL1A, IL1B, IL7R, INDO, INHBA, LCP2, LILRB1, MMP3, NFE2, PTGS2, PTPRC, SOCS3, SPP1, TLR2	23
	Tissue Morphology	quantity	quantity of antigen presenting cells	2.63e-05	ABCA1, CCL2, FLI1, IL6, IL11, MMP3, PLAT, PLAU, TNFRSF11B	9			Tissue Morphology	quantity	quantity of mononuclear leukocytes	1.31e-10	BCL2A1, C5AR1, CSF3, CSF2RB, EGR1, FCER1G, FCGR1A, FCGR2A, HLA-DQA1, ICAM1, IL6, IL8, IL1A, IL7R, INHBA, ITGAM, LCP2, OSM, PROK2, PTPRC, RHOH, SELE, SELL, TLR2, TNFRSF1B, TNFSF13B	26			Cell-To-Cell Signaling and Interaction	recruitment	recruitment of lymphatic system cells	6.15e-09	C5AR1, CCL4, CCR1, CSF3, CXCL10, IL8, IL1B, IL8RB, SELE, SERPINE1, THBS2, TLR2	12
	Immune and Lymphatic System Development and Function	quantity	quantity of antigen presenting cells	2.63e-05	ABCA1, CCL2, FLI1, IL6, IL11, MMP3, PLAT, PLAU, TNFRSF11B	9			Cellular Development	differentiation	differentiation of lymphatic system cells	1.4e-10	BCL6, CCR1, CD14, CSF3, CSF2RB, CSF3R, EGR1, FCER1G, HLA-DQA1, ICAM1, IL6, IL11, IL13RA2, IL7R, INHBA, LCP2, LILRA6, NFE2, PTGS2, PTPRC, RHOH, SOCS3, THBS2, TLR4, TNFSF13B, TREM1, ZFP36	27			Immune Response	homing	homing of T lymphocytes	6.82e-09	CCL4, CCL8, CCR1, CXCL10, CXCL11, GNLY, IL8, SOCS3, SPP1, THBS2	10
	Immune and Lymphatic System Development and Function	immunological process	immunological process of cells	2.63e-05	CCL4, ENTPD1, FCER1G, FCGR2A, FST, IL11, LCP2, PLAT, WIPF1	9			Carbohydrate Metabolism	binding	binding of polysaccharide	1.4e-10	CD14, EMR2, FGF2, IL8, LY96, OSM, SELP, SPP1, TLR4, TNC, TNFAIP6	11			Cellular Movement	homing	homing of T lymphocytes	6.82e-09	CCL4, CCL8, CCR1, CXCL10, CXCL11, GNLY, IL8, SOCS3, SPP1, THBS2	10
	Cardiovascular Disease	cardiovascular disorder	cardiovascular disorder of rodents	2.78e-05	ABCA1, CCL2, CXCR7, EDNRB, IL6, NR3C1, PLAU, PTGS1, PTGS2, SELE, SERPINE1	11			Immunological Disease	apoptosis	apoptosis of lymphatic system cells	1.46e-10	ANPEP, BCL2A1, CASP4, CCL4, CD14, CSF3, EGR1, GADD45B, ICAM1, IL6, IL8, IL11, IL1B, IL1RN, IL7R, ITGAM, LILRB1, NAMPT, PTPRC, SOD2, SPP1, THBS2, TLR4, TNFRSF1B, TNFSF13B	25			Hematological System Development and Function	homing	homing of T lymphocytes	6.82e-09	CCL4, CCL8, CCR1, CXCL10, CXCL11, GNLY, IL8, SOCS3, SPP1, THBS2	10
	Organismal Survival	survival	survival of mammalia	2.78e-05	CCL2, FLI1, FST, HGF, IL6, IL11, IL7R, INHBA, LY96, MME, PLAT, PTGS1, SOCS3	13			Cell Death	apoptosis	apoptosis of lymphatic system cells	1.46e-10	ANPEP, BCL2A1, CASP4, CCL4, CD14, CSF3, EGR1, GADD45B, ICAM1, IL6, IL8, IL11, IL1B, IL1RN, IL7R, ITGAM, LILRB1, NAMPT, PTPRC, SOD2, SPP1, THBS2, TLR4, TNFRSF1B, TNFSF13B	25			Hematological System Development and Function	quantity	quantity of mononuclear leukocytes	6.82e-09	BCL2A1, C5AR1, CD69, CSF3, CXCL10, FCGR2A, IL6, IL8, IL1A, IL7R, INHBA, LCP2, OSM, PROK2, PSCDBP, PTPRC, SELE, SELL, TLR2	19
	Cellular Movement	migration	migration of T lymphocytes	2.84e-05	CCL2, CCL4, CD69, FYB, HGF, PLAU, SELE	7			Cellular Growth and Proliferation	formation	formation of connective tissue cells	1.59e-10	EGR1, FGF2, FST, HGF, IL6, IL11, IL1A, IL1B, INHBA, PTGS2, SOCS3, TNFRSF11B, TNFRSF1B	13			Tissue Morphology	quantity	quantity of mononuclear leukocytes	6.82e-09	BCL2A1, C5AR1, CD69, CSF3, CXCL10, FCGR2A, IL6, IL8, IL1A, IL7R, INHBA, LCP2, OSM, PROK2, PSCDBP, PTPRC, SELE, SELL, TLR2	19
	Cellular Movement	movement	movement of T lymphocytes	2.84e-05	CCL2, CCL4, CD69, FYB, HGF, PLAU, SELE	7			Tissue Development	developmental process	developmental process of connective tissue	1.61e-10	EGR1, FCER1G, FGF2, GADD45B, GAS1, HOXD11, HOXD13, IL6, IL11, IL1A, IL1B, IL1RN, OSM, PRRX1, PTGS2, SATB2, SPP1, STC1, THBS2, TNFRSF11B, TNFRSF1B	21			Immune and Lymphatic System Development and Function	quantity	quantity of mononuclear leukocytes	6.82e-09	BCL2A1, C5AR1, CD69, CSF3, CXCL10, FCGR2A, IL6, IL8, IL1A, IL7R, INHBA, LCP2, OSM, PROK2, PSCDBP, PTPRC, SELE, SELL, TLR2	19
	Connective Tissue Disorders	ankylosing spondylitis	ankylosing spondylitis	2.84e-05	CD86, NR3C1, PTGS1, PTGS2	4			Inflammatory Disease	rheumatic disease	rheumatic disease of rodents	1.88e-10	ALOX5AP, C5AR1, CR1, CSF3, DUSP1, FCER1G, FCGR1A, FCGR2A, IL6, IL1A, IL1B, IL1RN, MMP3, SOCS3, TNFRSF1B, ZFP36	16			Cellular Development	differentiation	differentiation of connective tissue cells	6.93e-09	FGF2, HSD11B1, IL6, IL8, IL11, IL1A, IL1B, INHBA, MMP3, MMP1 (includes EG:4312), OSM, SOCS3, STC1, TLR2, TNFRSF11B, WNT5A	16
	Inflammatory Disease	ankylosing spondylitis	ankylosing spondylitis	2.84e-05	CD86, NR3C1, PTGS1, PTGS2	4			Connective Tissue Disorders	rheumatic disease	rheumatic disease of rodents	1.88e-10	ALOX5AP, C5AR1, CR1, CSF3, DUSP1, FCER1G, FCGR1A, FCGR2A, IL6, IL1A, IL1B, IL1RN, MMP3, SOCS3, TNFRSF1B, ZFP36	16			Cellular Growth and Proliferation	formation	formation of osteoclasts	7.06e-09	FGF2, IL6, IL11, IL1A, IL1B, INHBA, PTGS2, SOCS3, TNFRSF11B	9
	Skeletal and Muscular Disorders	ankylosing spondylitis	ankylosing spondylitis	2.84e-05	CD86, NR3C1, PTGS1, PTGS2	4			Skeletal and Muscular Disorders	rheumatic disease	rheumatic disease of rodents	1.88e-10	ALOX5AP, C5AR1, CR1, CSF3, DUSP1, FCER1G, FCGR1A, FCGR2A, IL6, IL1A, IL1B, IL1RN, MMP3, SOCS3, TNFRSF1B, ZFP36	16			Connective Tissue Development and Function	formation	formation of osteoclasts	7.06e-09	FGF2, IL6, IL11, IL1A, IL1B, INHBA, PTGS2, SOCS3, TNFRSF11B	9
	Cancer	binding	binding of tumor cell lines	2.84e-05	FCGR2A, FERMT2, FYB, HGF, IGFBP5, IL6, PLAU, SERPINE1, TNC	9			Cellular Development	development	development of lymphatic system cells	2.07e-10	BCL6, CSF3, CSF3R, CXCL11, EGR1, FCER1G, FCGR2A, FGF2, FST, ICAM1, IL6, IL11, IL1A, IL1B, IL1RN, IL7R, LCP2, OSM, PTPRC, SOCS3, THBS2, TNFRSF11B, TNFSF13B	23			Skeletal and Muscular System Development and Function	formation	formation of osteoclasts	7.06e-09	FGF2, IL6, IL11, IL1A, IL1B, INHBA, PTGS2, SOCS3, TNFRSF11B	9
	Cell-To-Cell Signaling and Interaction	binding	binding of tumor cell lines	2.84e-05	FCGR2A, FERMT2, FYB, HGF, IGFBP5, IL6, PLAU, SERPINE1, TNC	9			Inflammatory Disease	arthritis	arthritis of mice	2.09e-10	ALOX5AP, C5AR1, CR1, CSF3, DUSP1, FCER1G, FCGR1A, FCGR2A, IL6, IL1A, IL1B, IL1RN, SOCS3, TNFRSF1B, ZFP36	15			Connective Tissue Disorders	arthritis	arthritis of animal	8.05e-09	C5AR1, CD69, CSF3, FCGR2A, IL6, IL1A, IL1B, IL1RN, MMP3, MMP10, SOCS3, TLR2	12
	Hematological Disease	hematological disorder	hematological disorder of artery	2.84e-05	PLAU, SERPINE1, TFPI, THBD	4			Inflammatory Disease	inflammatory arthropathy	inflammatory arthropathy of mice	2.09e-10	ALOX5AP, C5AR1, CR1, CSF3, DUSP1, FCER1G, FCGR1A, FCGR2A, IL6, IL1A, IL1B, IL1RN, SOCS3, TNFRSF1B, ZFP36	15			Connective Tissue Disorders	arthritis	arthritis of organism	8.05e-09	C5AR1, CD69, CSF3, FCGR2A, IL6, IL1A, IL1B, IL1RN, MMP3, MMP10, SOCS3, TLR2	12
	Molecular Transport	release	release of superoxide	2.84e-05	CCL2, FCER1G, FCGR2A, PLAU, SELE	5			Connective Tissue Disorders	arthritis	arthritis of mice	2.09e-10	ALOX5AP, C5AR1, CR1, CSF3, DUSP1, FCER1G, FCGR1A, FCGR2A, IL6, IL1A, IL1B, IL1RN, SOCS3, TNFRSF1B, ZFP36	15			Inflammatory Disease	arthritis	arthritis of animal	8.05e-09	C5AR1, CD69, CSF3, FCGR2A, IL6, IL1A, IL1B, IL1RN, MMP3, MMP10, SOCS3, TLR2	12
	Organismal Survival	survival	survival of animal	2.84e-05	CCL2, FLI1, FST, HGF, IL6, IL11, IL7R, INHBA, LY96, MME, PLAT, PTGS1, SOCS3	13			Connective Tissue Disorders	inflammatory arthropathy	inflammatory arthropathy of mice	2.09e-10	ALOX5AP, C5AR1, CR1, CSF3, DUSP1, FCER1G, FCGR1A, FCGR2A, IL6, IL1A, IL1B, IL1RN, SOCS3, TNFRSF1B, ZFP36	15			Inflammatory Disease	arthritis	arthritis of organism	8.05e-09	C5AR1, CD69, CSF3, FCGR2A, IL6, IL1A, IL1B, IL1RN, MMP3, MMP10, SOCS3, TLR2	12
	Organismal Survival	survival	survival of organism	2.84e-05	CCL2, FLI1, FST, HGF, IL6, IL11, IL7R, INHBA, LY96, MME, PLAT, PTGS1, SOCS3	13			Skeletal and Muscular Disorders	arthritis	arthritis of mice	2.09e-10	ALOX5AP, C5AR1, CR1, CSF3, DUSP1, FCER1G, FCGR1A, FCGR2A, IL6, IL1A, IL1B, IL1RN, SOCS3, TNFRSF1B, ZFP36	15			Skeletal and Muscular Disorders	arthritis	arthritis of animal	8.05e-09	C5AR1, CD69, CSF3, FCGR2A, IL6, IL1A, IL1B, IL1RN, MMP3, MMP10, SOCS3, TLR2	12
	Digestive System Development and Function	regeneration	regeneration of liver	2.84e-05	HGF, IL6, PTGS1, PTGS2	4			Skeletal and Muscular Disorders	inflammatory arthropathy	inflammatory arthropathy of mice	2.09e-10	ALOX5AP, C5AR1, CR1, CSF3, DUSP1, FCER1G, FCGR1A, FCGR2A, IL6, IL1A, IL1B, IL1RN, SOCS3, TNFRSF1B, ZFP36	15			Skeletal and Muscular Disorders	arthritis	arthritis of organism	8.05e-09	C5AR1, CD69, CSF3, FCGR2A, IL6, IL1A, IL1B, IL1RN, MMP3, MMP10, SOCS3, TLR2	12
	Hepatic System Development and Function	regeneration	regeneration of liver	2.84e-05	HGF, IL6, PTGS1, PTGS2	4			Immune Response	accumulation	accumulation of leukocytes	2.09e-10	CCR1, CR1, CSF3, EGR1, ICAM1, IL8, IL11, IL1B, ITGAM, PTX3, S100A8, S100A9, SELE, SELL, SELP, TLR4	16			Immune Response	chemotaxis	chemotaxis of lymphocytes	8.05e-09	CCL4, CCL8, CCR1, CXCL10, CXCL11, GNLY, IL8, RGS1, SOCS3, SPP1, THBS2	11
	Organ Morphology	regeneration	regeneration of liver	2.84e-05	HGF, IL6, PTGS1, PTGS2	4			Hematological System Development and Function	accumulation	accumulation of leukocytes	2.09e-10	CCR1, CR1, CSF3, EGR1, ICAM1, IL8, IL11, IL1B, ITGAM, PTX3, S100A8, S100A9, SELE, SELL, SELP, TLR4	16			Cellular Movement	chemotaxis	chemotaxis of lymphocytes	8.05e-09	CCL4, CCL8, CCR1, CXCL10, CXCL11, GNLY, IL8, RGS1, SOCS3, SPP1, THBS2	11
	Free Radical Scavenging	release	release of superoxide	2.84e-05	CCL2, FCER1G, FCGR2A, PLAU, SELE	5			Immune and Lymphatic System Development and Function	accumulation	accumulation of leukocytes	2.09e-10	CCR1, CR1, CSF3, EGR1, ICAM1, IL8, IL11, IL1B, ITGAM, PTX3, S100A8, S100A9, SELE, SELL, SELP, TLR4	16			Hematological System Development and Function	chemotaxis	chemotaxis of lymphocytes	8.05e-09	CCL4, CCL8, CCR1, CXCL10, CXCL11, GNLY, IL8, RGS1, SOCS3, SPP1, THBS2	11
	Immunological Disease	immunological disorder	immunological disorder of rodents	2.88e-05	CCL2, CCL4, CD86, FCER1G, FCGR2A, IL6, IL7R, LCP2, NR3C1, PLAT, SOCS3, TNFRSF11B	12			Tissue Development	accumulation	accumulation of leukocytes	2.09e-10	CCR1, CR1, CSF3, EGR1, ICAM1, IL8, IL11, IL1B, ITGAM, PTX3, S100A8, S100A9, SELE, SELL, SELP, TLR4	16			Cancer	apoptosis	apoptosis of tumor cell lines	8.06e-09	AIM2, BCL6, BCL2A1, CYR61, DKK1, FAP, FGF2, FST, GNLY, HGF, IL6, IL8, IL24, IL1A, IL1B, INHBA, MME, PTGS2, PTPRC, S100A8, S100A9, SOCS3, SOD2, SPP1, TLR2, TNFRSF10C, TNFRSF11B, TWIST1, VCAN	29
	Inflammatory Disease	airway hyperresponsiveness	airway hyperresponsiveness of organism	3.2e-05	CD86, HGF, IL6, IL13RA2, PLAT, SOCS3	6			Immune and Lymphatic System Development and Function	immunological process	immunological process of eukaryotic cells	2.5e-10	C5AR1, CCL4, CCR1, CSF3, FCER1G, FCGR2A, FCGR3B, FPR1, FST, HCK, IL8, IL11, ITGAM, LCP2, LILRA6, PILRA, TREM1	17			Cell Death	apoptosis	apoptosis of tumor cell lines	8.06e-09	AIM2, BCL6, BCL2A1, CYR61, DKK1, FAP, FGF2, FST, GNLY, HGF, IL6, IL8, IL24, IL1A, IL1B, INHBA, MME, PTGS2, PTPRC, S100A8, S100A9, SOCS3, SOD2, SPP1, TLR2, TNFRSF10C, TNFRSF11B, TWIST1, VCAN	29
	Cancer	tumorigenesis	tumorigenesis of carcinoma	3.2e-05	CAV1, HGF, MMP3, PTGS2, SOCS3, VIM	6			Organismal Injury and Abnormalities	cytosis	cytosis of mice	2.5e-10	CSF3, CSF3R, HBB (includes EG:3043), IL6, IL8, MME, NFE2, S100A9, SELE, SELP, SOCS3, TLR2	12			Cancer	tumor	tumor	1.06e-08	AIM2, BCL6, COL12A1, COL7A1, CSF3R, CXCL10, CXCL14, CYR61, FGF2, GAS1, HGF, HSD11B1, IFI44L, IFIT3, IL6, IL13RA2, IL1A, IL1B, IL1RN, IL7R, IL8RB, INHBA, MME, MMP3, MMP10, MMP1 (includes EG:4312), PDE4B, PTGS2, PTPRC, S100A8, S100A9, SOCS3, SOD2, SPP1, TFPI2, THBS2, TLR1, TNC, TWIST1, VCAN, WNT5A	41
	Cancer	digestive organ tumor	digestive organ tumor	3.26e-05	ANTXR1, C1S, HGF, IGFBP5, IL6, MIRN155 (includes EG:114614), NNMT, PDPN, PLAT, PLAU, PTGS1, PTGS2, SOCS3, TNC, VIM	15			Inflammatory Disease	rheumatic disease	rheumatic disease of mammalia	2.65e-10	ALOX5AP, C5AR1, CR1, CSF3, DUSP1, FCER1G, FCGR1A, FCGR2A, IL6, IL1A, IL1B, IL1RN, MMP3, SOCS3, TNFRSF1B, ZFP36	16			Cancer	cell death	cell death of tumor cell lines	1.06e-08	AIM2, BCL6, BCL2A1, CYR61, DKK1, FAP, FGF2, FST, GNLY, HGF, IL6, IL8, IL24, IL1A, IL1B, IL1RN, INHBA, MME, NAMPT, PTGS2, PTPRC, S100A8, S100A9, SOCS3, SOD2, SPP1, TLR2, TNFRSF10C, TNFRSF11B, TWIST1, VCAN	31
	Tissue Morphology	quantity	quantity of granulocytes	3.26e-05	CSF2RB, FLI1, IL6, MMP3, PDE4B, S100A9, SELE, SOCS3	8			Connective Tissue Disorders	rheumatic disease	rheumatic disease of mammalia	2.65e-10	ALOX5AP, C5AR1, CR1, CSF3, DUSP1, FCER1G, FCGR1A, FCGR2A, IL6, IL1A, IL1B, IL1RN, MMP3, SOCS3, TNFRSF1B, ZFP36	16			Cell Death	cell death	cell death of tumor cell lines	1.06e-08	AIM2, BCL6, BCL2A1, CYR61, DKK1, FAP, FGF2, FST, GNLY, HGF, IL6, IL8, IL24, IL1A, IL1B, IL1RN, INHBA, MME, NAMPT, PTGS2, PTPRC, S100A8, S100A9, SOCS3, SOD2, SPP1, TLR2, TNFRSF10C, TNFRSF11B, TWIST1, VCAN	31
	Immune and Lymphatic System Development and Function	quantity	quantity of granulocytes	3.26e-05	CSF2RB, FLI1, IL6, MMP3, PDE4B, S100A9, SELE, SOCS3	8			Cellular Growth and Proliferation	growth	growth of eukaryotic cells	2.65e-10	BCL6, C5AR1, CCL4, CD14, CDX2, CSF3, CSF2RB, CSF3R, DUSP1, EGR1, EREG, FCER1G, FGF2, FST, GADD45B, GBP2, HGF, HOXB13, IGFBP5, IL6, IL8, IL11, IL24, IL13RA2, IL1A, IL1B, IL1RN, IL7R, IL8RB, INHBA, LCP2, NRCAM, OSM, PDGFD, PRRX1, PTGS2, SERPINE1, SOCS3, SOD2, SPP1, THBS2, TNFAIP6, TNFRSF1B, TNFSF13B, WNT5A	45			Cell-To-Cell Signaling and Interaction	binding	binding of tumor cell lines	1.11e-08	CLEC7A, CXCL10, FCGR2A, HGF, IL6, IL1B, IL8RB, OSM, PYY, SELL, SERPINE1, SPP1, TNC	13
	Hematological System Development and Function	quantity	quantity of granulocytes	3.26e-05	CSF2RB, FLI1, IL6, MMP3, PDE4B, S100A9, SELE, SOCS3	8			Connective Tissue Disorders	connective tissue disorder	connective tissue disorder of rodents	2.99e-10	ALOX5AP, C5AR1, CR1, CSF3, DUSP1, FCER1G, FCGR1A, FCGR2A, IL6, IL1A, IL1B, IL1RN, MMP3, SOCS3, TNFRSF1B, ZFP36	16			Cancer	binding	binding of tumor cell lines	1.11e-08	CLEC7A, CXCL10, FCGR2A, HGF, IL6, IL1B, IL8RB, OSM, PYY, SELL, SERPINE1, SPP1, TNC	13
	Gastrointestinal Disease	digestive organ tumor	digestive organ tumor	3.26e-05	ANTXR1, C1S, HGF, IGFBP5, IL6, MIRN155 (includes EG:114614), NNMT, PDPN, PLAT, PLAU, PTGS1, PTGS2, SOCS3, TNC, VIM	15			Inflammatory Disease	inflammatory disorder	inflammatory disorder of granulocytes	3.3e-10	ANPEP, FCER1G, FGR, FPR1, HCK, ICAM1, ITGAM, ITGAX, LILRA6, TREM1	10			Cellular Movement	chemotaxis	chemotaxis of antigen presenting cells	1.24e-08	C5AR1, CCL4, CCL8, CXCL14, FPR1, FPR2, GNLY, IL1A, IL1B, INHBA, SELE	11
	Neurological Disease	neurological disorder	neurological disorder	3.26e-05	ABCA1, ACSL4, CALD1, CCL2, CD86, CXCL6, DDX58, EBI2, FCER1G, HGF, IGFBP5, IL6, IL7R, MME, MMP3, MMP10, NR3C1, PDE4B, PLAT, PLAU, PTGS1, PTGS2, QKI (includes EG:9444), RDX, SGCE, ST8SIA4, TMEM47, VIM, ZEB2	29			Inflammatory Disease	respiratory burst	respiratory burst of granulocytes	3.3e-10	ANPEP, FCER1G, FGR, FPR1, HCK, ICAM1, ITGAM, ITGAX, LILRA6, TREM1	10			Cellular Movement	migration	migration of tumor cell lines	1.39e-08	CSF3, CXCL10, CYR61, FGF2, HGF, IL6, IL8, IL1A, MME, MMP3, OSM, SERPINE1, SOCS3, SOD2, SPP1, TWIST1, WNT5A	17
	Cancer	differentiation	differentiation of tumor cell lines	3.35e-05	CSF2RB, FLI1, FST, HGF, IGFBP5, IL6, IL11, INHBA, RUNX2, SOCS3, ST8SIA4, VCAN	12			Immunological Disease	inflammatory disorder	inflammatory disorder of granulocytes	3.3e-10	ANPEP, FCER1G, FGR, FPR1, HCK, ICAM1, ITGAM, ITGAX, LILRA6, TREM1	10			Cancer	migration	migration of tumor cell lines	1.39e-08	CSF3, CXCL10, CYR61, FGF2, HGF, IL6, IL8, IL1A, MME, MMP3, OSM, SERPINE1, SOCS3, SOD2, SPP1, TWIST1, WNT5A	17
	Cellular Movement	chemotaxis	chemotaxis of astrocytes	3.37e-05	CAV1, CCL2, IL6	3			Immunological Disease	respiratory burst	respiratory burst of granulocytes	3.3e-10	ANPEP, FCER1G, FGR, FPR1, HCK, ICAM1, ITGAM, ITGAX, LILRA6, TREM1	10			Cellular Movement	mobilization	mobilization of lymphatic system cells	1.59e-08	CCL4, CSF3, CXCL10, CXCL14, FPR1, IL8, IL1B	7
	Organismal Survival	death	death of mice	3.37e-05	ABCA1, DDX58, FCER1G, FLI1, HGF, IGFBP5, IL6, LCP2, LOX, LY96, MME, NR3C1, PTGS1, PTGS2, ROBO1, RUNX2, SOCS3, ST8SIA4, THBD, TNFRSF11B	20			Hematological Disease	inflammatory disorder	inflammatory disorder of granulocytes	3.3e-10	ANPEP, FCER1G, FGR, FPR1, HCK, ICAM1, ITGAM, ITGAX, LILRA6, TREM1	10			Hematological System Development and Function	development	development of mononuclear leukocytes	1.67e-08	BCL6, CD69, CSF3R, CXCL11, DKK1, FCGR2A, IL6, IL1A, IL1B, IL7R, LCP2, OSM, PTPRC, SOCS3, TNFRSF11B	15
	Organ Morphology	thickness	thickness of interalveolar septa	3.37e-05	CAV1, CAV2, NR3C1	3			Hematological Disease	respiratory burst	respiratory burst of granulocytes	3.3e-10	ANPEP, FCER1G, FGR, FPR1, HCK, ICAM1, ITGAM, ITGAX, LILRA6, TREM1	10			Cellular Development	development	development of mononuclear leukocytes	1.67e-08	BCL6, CD69, CSF3R, CXCL11, DKK1, FCGR2A, IL6, IL1A, IL1B, IL7R, LCP2, OSM, PTPRC, SOCS3, TNFRSF11B	15
	Nervous System Development and Function	chemotaxis	chemotaxis of astrocytes	3.37e-05	CAV1, CCL2, IL6	3			Cellular Function and Maintenance	respiratory burst	respiratory burst of granulocytes	3.3e-10	ANPEP, FCER1G, FGR, FPR1, HCK, ICAM1, ITGAM, ITGAX, LILRA6, TREM1	10			Cellular Movement	movement	movement of tumor cell lines	1.68e-08	CSF3, CXCL10, CYR61, FGF2, HGF, IL6, IL8, IL1A, MME, MMP3, OSM, SERPINE1, SOCS3, SOD2, SPP1, TWIST1, WNT5A	17
	Respiratory System Development and Function	thickness	thickness of interalveolar septa	3.37e-05	CAV1, CAV2, NR3C1	3			Cellular Movement	cell movement	cell movement of tumor cell lines	3.33e-10	CCL4, CXCL5, CXCL14, FGF2, FPR1, FPR2, HGF, IL6, IL8, IL8RA, IL8RB, NRCAM, OSM, PREX1, SELE, SELL, SELP, SERPINE1, SPP1, WNT5A	20			Cancer	movement	movement of tumor cell lines	1.68e-08	CSF3, CXCL10, CYR61, FGF2, HGF, IL6, IL8, IL1A, MME, MMP3, OSM, SERPINE1, SOCS3, SOD2, SPP1, TWIST1, WNT5A	17
	Cell-To-Cell Signaling and Interaction	communication	communication of cells	3.4e-05	CCL4, CCL8, CXCL5, CXCL6, DDX58, IL6, INHBA, LILRB2, MME, S100A9, STC1, WNT5A	12			Cancer	cell movement	cell movement of tumor cell lines	3.33e-10	CCL4, CXCL5, CXCL14, FGF2, FPR1, FPR2, HGF, IL6, IL8, IL8RA, IL8RB, NRCAM, OSM, PREX1, SELE, SELL, SELP, SERPINE1, SPP1, WNT5A	20			Hematological System Development and Function	adhesion	adhesion of lymphocytes	1.9e-08	CCL4, CXCL11, HGF, IL6, IL11, OSM, RGS1, SELE, SELL, SPP1, THBS2	11
	Connective Tissue Disorders	polyarticular juvenile rheumatoid arthritis	polyarticular juvenile rheumatoid arthritis	3.41e-05	CCL4, CD69, MME, PTGS1, PTGS2, S100A9, TLR1	7			Organismal Injury and Abnormalities	cytosis	cytosis of mammalia	3.76e-10	CSF3, CSF3R, HBB (includes EG:3043), IL6, IL8, MME, NFE2, S100A9, SELE, SELP, SOCS3, TLR2	12			Cell-To-Cell Signaling and Interaction	adhesion	adhesion of lymphocytes	1.9e-08	CCL4, CXCL11, HGF, IL6, IL11, OSM, RGS1, SELE, SELL, SPP1, THBS2	11
	Inflammatory Disease	polyarticular juvenile rheumatoid arthritis	polyarticular juvenile rheumatoid arthritis	3.41e-05	CCL4, CD69, MME, PTGS1, PTGS2, S100A9, TLR1	7			Cell Death	survival	survival of eukaryotic cells	3.78e-10	BCL6, BCL2A1, CCL4, CCR1, CHI3L1, CR1, CSF3, CSF2RB, DUSP1, FCER1G, FGF2, FGR, GADD45B, HCK, HGF, ICAM1, IL6, IL8, IL24, IL1A, IL1B, NCF2, NFE2, NFIL3, NRCAM, OSM, PROK2, PTGS2, SERPINB2, SERPINE1, SFRP2, SOD2, SPP1, TNFRSF1B, TNFSF13B, TWIST1	36			Tissue Development	adhesion	adhesion of lymphocytes	1.9e-08	CCL4, CXCL11, HGF, IL6, IL11, OSM, RGS1, SELE, SELL, SPP1, THBS2	11
	Skeletal and Muscular Disorders	polyarticular juvenile rheumatoid arthritis	polyarticular juvenile rheumatoid arthritis	3.41e-05	CCL4, CD69, MME, PTGS1, PTGS2, S100A9, TLR1	7			Inflammatory Disease	inflammation	inflammation of organism	3.8e-10	ALOX5AP, CD14, FCER1G, IL6, IL8, IL11, IL1B, PTGS2, SELL, TLR4, TNFAIP3, TNFRSF1B, ZFP36	13			Immune and Lymphatic System Development and Function	adhesion	adhesion of lymphocytes	1.9e-08	CCL4, CXCL11, HGF, IL6, IL11, OSM, RGS1, SELE, SELL, SPP1, THBS2	11
	Immunological Disease	polyarticular juvenile rheumatoid arthritis	polyarticular juvenile rheumatoid arthritis	3.41e-05	CCL4, CD69, MME, PTGS1, PTGS2, S100A9, TLR1	7			Immune Response	inflammation	inflammation of organism	3.8e-10	ALOX5AP, CD14, FCER1G, IL6, IL8, IL11, IL1B, PTGS2, SELL, TLR4, TNFAIP3, TNFRSF1B, ZFP36	13			Cellular Growth and Proliferation	stimulation	stimulation of eukaryotic cells	1.97e-08	C5AR1, CSF3, CXCL5, FGF2, HGF, IL6, IL8, IL11, IL1A, IL1B, OSM, PTPRC	12
	Cancer	disease process	disease process of carcinoma	3.45e-05	CAV1, HGF, MMP3, PTGS2, SOCS3, VIM	6			Inflammatory Disease	respiratory burst	respiratory burst of cells	3.84e-10	ANPEP, CD14, FCER1G, FGR, FPR1, HCK, ICAM1, ITGAM, ITGAX, LILRA6, TREM1	11			Cell-To-Cell Signaling and Interaction	stimulation	stimulation of eukaryotic cells	1.97e-08	C5AR1, CSF3, CXCL5, FGF2, HGF, IL6, IL8, IL11, IL1A, IL1B, OSM, PTPRC	12
	Cardiovascular Disease	cardiovascular disorder	cardiovascular disorder of mammalia	3.45e-05	ABCA1, CCL2, CXCR7, EDNRB, IL6, NR3C1, PLAU, PTGS1, PTGS2, SELE, SERPINE1	11			Immune Response	proliferation	proliferation of lymphocytes	3.84e-10	BCL6, CCL4, CD14, CR1, EGR1, FYB, HCK, ICAM1, IL6, IL1A, IL1B, IL7R, INDO, INHBA, ITGAM, ITGAX, LCP2, LILRB1, LY96, MMP3, PTGS2, PTPRC, RGS2, SOCS3, SPP1, TLR2, TLR4, TNFRSF1B, TNFSF13B	29			Cell Signaling	mobilization	mobilization of Ca2+	1.97e-08	CCL4, CCR1, CXCL10, CXCL11, FCGR2A, FPR1, IL8, IL8RB, LILRB2, PYY, SELL, TREM1	12
	Cellular Growth and Proliferation	proliferation	proliferation of lymphocytes	3.55e-05	CAV1, CCL4, CD86, FYB, IL6, IL7R, INHBA, LCP2, LILRB1, LY96, MMP3, PTGS2, SLAMF7, SOCS3, WIPF1	15			Immune Response	rolling	rolling of leukocytes	3.84e-10	CD14, FCGR2A, ICAM1, IL1B, IL8RA, ITGAM, SELE, SELL, SELP, TLR4, TNFRSF11B	11			Molecular Transport	mobilization	mobilization of Ca2+	1.97e-08	CCL4, CCR1, CXCL10, CXCL11, FCGR2A, FPR1, IL8, IL8RB, LILRB2, PYY, SELL, TREM1	12
	Immune and Lymphatic System Development and Function	proliferation	proliferation of lymphocytes	3.55e-05	CAV1, CCL4, CD86, FYB, IL6, IL7R, INHBA, LCP2, LILRB1, LY96, MMP3, PTGS2, SLAMF7, SOCS3, WIPF1	15			Cellular Movement	migration	migration of tumor cell lines	3.84e-10	ANPEP, CDX2, CSF3, EGR1, FGF2, HGF, IGFBP5, IL6, IL8, IL1A, ITGAM, KLK6, MME, MMP3, OSM, PREX1, SERPINE1, SLC16A4, SOCS3, SOD2, SPP1, TWIST1, WNT5A	23			Vitamin and Mineral Metabolism	mobilization	mobilization of Ca2+	1.97e-08	CCL4, CCR1, CXCL10, CXCL11, FCGR2A, FPR1, IL8, IL8RB, LILRB2, PYY, SELL, TREM1	12
	Hematological System Development and Function	proliferation	proliferation of lymphocytes	3.55e-05	CAV1, CCL4, CD86, FYB, IL6, IL7R, INHBA, LCP2, LILRB1, LY96, MMP3, PTGS2, SLAMF7, SOCS3, WIPF1	15			Cellular Movement	rolling	rolling of leukocytes	3.84e-10	CD14, FCGR2A, ICAM1, IL1B, IL8RA, ITGAM, SELE, SELL, SELP, TLR4, TNFRSF11B	11			Cellular Growth and Proliferation	stimulation	stimulation of cells	2.15e-08	C5AR1, CSF3, CXCL5, FGF2, HGF, IL6, IL8, IL11, IL1A, IL1B, OSM, PTPRC	12
	Immune Response	proliferation	proliferation of lymphocytes	3.55e-05	CAV1, CCL4, CD86, FYB, IL6, IL7R, INHBA, LCP2, LILRB1, LY96, MMP3, PTGS2, SLAMF7, SOCS3, WIPF1	15			Hematological System Development and Function	proliferation	proliferation of lymphocytes	3.84e-10	BCL6, CCL4, CD14, CR1, EGR1, FYB, HCK, ICAM1, IL6, IL1A, IL1B, IL7R, INDO, INHBA, ITGAM, ITGAX, LCP2, LILRB1, LY96, MMP3, PTGS2, PTPRC, RGS2, SOCS3, SPP1, TLR2, TLR4, TNFRSF1B, TNFSF13B	29			Cell-To-Cell Signaling and Interaction	stimulation	stimulation of cells	2.15e-08	C5AR1, CSF3, CXCL5, FGF2, HGF, IL6, IL8, IL11, IL1A, IL1B, OSM, PTPRC	12
	Immunological Disease	immunological disorder	immunological disorder of mammalia	3.7e-05	CCL2, CCL4, CD86, FCER1G, FCGR2A, IL6, IL7R, LCP2, NR3C1, PLAT, SOCS3, TNFRSF11B	12			Hematological System Development and Function	rolling	rolling of leukocytes	3.84e-10	CD14, FCGR2A, ICAM1, IL1B, IL8RA, ITGAM, SELE, SELL, SELP, TLR4, TNFRSF11B	11			DNA Replication, Recombination, and Repair	synthesis	synthesis of DNA	2.17e-08	CSF3, CXCL10, CYR61, EREG, FGF2, HGF, IL6, IL8, IL1A, IL1B, IL1RN, INHBA, OSM, PTGS2, SPP1, TFPI2, THBS2, TNC	18
	Cellular Growth and Proliferation	proliferation	proliferation of mononuclear leukocytes	3.71e-05	CAV1, CCL4, CD86, FYB, IL6, IL7R, INHBA, LCP2, LILRB1, LY96, MMP3, PTGS2, SLAMF7, SOCS3, WIPF1	15			Immune and Lymphatic System Development and Function	proliferation	proliferation of lymphocytes	3.84e-10	BCL6, CCL4, CD14, CR1, EGR1, FYB, HCK, ICAM1, IL6, IL1A, IL1B, IL7R, INDO, INHBA, ITGAM, ITGAX, LCP2, LILRB1, LY96, MMP3, PTGS2, PTPRC, RGS2, SOCS3, SPP1, TLR2, TLR4, TNFRSF1B, TNFSF13B	29			Cellular Movement	mobilization	mobilization of phagocytes	2.53e-08	CCL4, CSF3, CXCL14, FPR1, IL8, IL1B	6
	Immune and Lymphatic System Development and Function	proliferation	proliferation of mononuclear leukocytes	3.71e-05	CAV1, CCL4, CD86, FYB, IL6, IL7R, INHBA, LCP2, LILRB1, LY96, MMP3, PTGS2, SLAMF7, SOCS3, WIPF1	15			Cancer	migration	migration of tumor cell lines	3.84e-10	ANPEP, CDX2, CSF3, EGR1, FGF2, HGF, IGFBP5, IL6, IL8, IL1A, ITGAM, KLK6, MME, MMP3, OSM, PREX1, SERPINE1, SLC16A4, SOCS3, SOD2, SPP1, TWIST1, WNT5A	23			Hematological System Development and Function	mobilization	mobilization of phagocytes	2.53e-08	CCL4, CSF3, CXCL14, FPR1, IL8, IL1B	6
	Hematological System Development and Function	proliferation	proliferation of mononuclear leukocytes	3.71e-05	CAV1, CCL4, CD86, FYB, IL6, IL7R, INHBA, LCP2, LILRB1, LY96, MMP3, PTGS2, SLAMF7, SOCS3, WIPF1	15			Cellular Growth and Proliferation	proliferation	proliferation of lymphocytes	3.84e-10	BCL6, CCL4, CD14, CR1, EGR1, FYB, HCK, ICAM1, IL6, IL1A, IL1B, IL7R, INDO, INHBA, ITGAM, ITGAX, LCP2, LILRB1, LY96, MMP3, PTGS2, PTPRC, RGS2, SOCS3, SPP1, TLR2, TLR4, TNFRSF1B, TNFSF13B	29			Immune Response	immunological process	immunological process of bone marrow cells	2.67e-08	CCL4, CSF3, FCGR2A, FCGR3B, FST, IL8, IL11, TREM1	8
	Immune Response	proliferation	proliferation of mononuclear leukocytes	3.71e-05	CAV1, CCL4, CD86, FYB, IL6, IL7R, INHBA, LCP2, LILRB1, LY96, MMP3, PTGS2, SLAMF7, SOCS3, WIPF1	15			Cellular Compromise	respiratory burst	respiratory burst of cells	3.84e-10	ANPEP, CD14, FCER1G, FGR, FPR1, HCK, ICAM1, ITGAM, ITGAX, LILRA6, TREM1	11			Immune and Lymphatic System Development and Function	immunological process	immunological process of bone marrow cells	2.67e-08	CCL4, CSF3, FCGR2A, FCGR3B, FST, IL8, IL11, TREM1	8
	Organismal Injury and Abnormalities	fibrin clot	fibrin clot	3.74e-05	PLAT, PLAU, SERPINE1, THBD	4			Cellular Function and Maintenance	engulfment	engulfment of eukaryotic cells	4e-10	CD93, CSF3, CSF2RB, CSF3R, FCGR1A, FCGR2A, FCGR3B, FGR, HCK, IL1A, ITGAM, TLR2, TLR4, TREM1	14			Immune Response	proliferation	proliferation of leukocyte cell lines	2.93e-08	CLEC7A, CSF3, CSF3R, FGF2, IL6, IL8, IL11, IL13RA2, IL7R, OSM, PTPRC, SOCS3, SPP1	13
	Cellular Movement	infiltration	infiltration of macrophages	3.79e-05	CCL2, CCL4, HGF, IL6, PLAU, PTGS2	6			Immune and Lymphatic System Development and Function	immunological process	immunological process of cells	4.06e-10	C5AR1, CCL4, CCR1, CSF3, FCER1G, FCGR2A, FCGR3B, FPR1, FST, HCK, IL8, IL11, ITGAM, LCP2, LILRA6, PILRA, TREM1	17			Hematological System Development and Function	proliferation	proliferation of leukocyte cell lines	2.93e-08	CLEC7A, CSF3, CSF3R, FGF2, IL6, IL8, IL11, IL13RA2, IL7R, OSM, PTPRC, SOCS3, SPP1	13
	Hematological System Development and Function	infiltration	infiltration of macrophages	3.79e-05	CCL2, CCL4, HGF, IL6, PLAU, PTGS2	6			Connective Tissue Disorders	connective tissue disorder	connective tissue disorder of mammalia	4.07e-10	ALOX5AP, C5AR1, CR1, CSF3, DUSP1, FCER1G, FCGR1A, FCGR2A, IL6, IL1A, IL1B, IL1RN, MMP3, SOCS3, TNFRSF1B, ZFP36	16			Cellular Growth and Proliferation	proliferation	proliferation of leukocyte cell lines	2.93e-08	CLEC7A, CSF3, CSF3R, FGF2, IL6, IL8, IL11, IL13RA2, IL7R, OSM, PTPRC, SOCS3, SPP1	13
	Immune Response	infiltration	infiltration of macrophages	3.79e-05	CCL2, CCL4, HGF, IL6, PLAU, PTGS2	6			Immune Response	proliferation	proliferation of mononuclear leukocytes	4.14e-10	BCL6, CCL4, CD14, CR1, EGR1, FYB, HCK, ICAM1, IL6, IL1A, IL1B, IL7R, INDO, INHBA, ITGAM, ITGAX, LCP2, LILRB1, LY96, MMP3, PTGS2, PTPRC, RGS2, SOCS3, SPP1, TLR2, TLR4, TNFRSF1B, TNFSF13B	29			Immune and Lymphatic System Development and Function	proliferation	proliferation of leukocyte cell lines	2.93e-08	CLEC7A, CSF3, CSF3R, FGF2, IL6, IL8, IL11, IL13RA2, IL7R, OSM, PTPRC, SOCS3, SPP1	13
	Cell Death	cell death	cell death of cell lines	3.81e-05	ANTXR1, CAV1, CSF2RB, DKK3, EDNRB, EMP3, FLI1, FST, GLIPR1, GNG2, HGF, IGFBP5, IL6, INHBA, MME, NR3C1, PLAU, PTGS1, PTGS2, QKI (includes EG:9444), RDX, S100A9, SDC2, SOCS3, TNFRSF11B, VCAN	26			Hematological System Development and Function	proliferation	proliferation of mononuclear leukocytes	4.14e-10	BCL6, CCL4, CD14, CR1, EGR1, FYB, HCK, ICAM1, IL6, IL1A, IL1B, IL7R, INDO, INHBA, ITGAM, ITGAX, LCP2, LILRB1, LY96, MMP3, PTGS2, PTPRC, RGS2, SOCS3, SPP1, TLR2, TLR4, TNFRSF1B, TNFSF13B	29			Cancer	primary tumor	primary tumor	3.07e-08	AIM2, BCL6, COL12A1, COL7A1, CSF3R, CXCL10, CXCL14, CYR61, FGF2, GAS1, HGF, HSD11B1, IFI44L, IFIT3, IL6, IL13RA2, IL1A, IL1B, IL1RN, IL8RB, INHBA, MME, MMP3, MMP10, MMP1 (includes EG:4312), PTGS2, PTPRC, S100A8, S100A9, SOCS3, SOD2, SPP1, TFPI2, THBS2, TNC, TWIST1, VCAN, WNT5A	38
	Cell-To-Cell Signaling and Interaction	attachment	attachment of eukaryotic cells	3.89e-05	CSF2RB, EMR2, LOX, PLAU, SELE, SERPINE1, TFPI2	7			Immune and Lymphatic System Development and Function	proliferation	proliferation of mononuclear leukocytes	4.14e-10	BCL6, CCL4, CD14, CR1, EGR1, FYB, HCK, ICAM1, IL6, IL1A, IL1B, IL7R, INDO, INHBA, ITGAM, ITGAX, LCP2, LILRB1, LY96, MMP3, PTGS2, PTPRC, RGS2, SOCS3, SPP1, TLR2, TLR4, TNFRSF1B, TNFSF13B	29			Immune Response	homing	homing of lymphocytes	3.09e-08	CCL4, CCL8, CCR1, CXCL10, CXCL11, GNLY, IL8, RGS1, SOCS3, SPP1, THBS2	11
	Cellular Movement	migration	migration of lymphocytes	3.93e-05	CCL2, CCL4, CD69, FYB, HGF, PLAU, PSCDBP, SELE	8			Cellular Growth and Proliferation	proliferation	proliferation of mononuclear leukocytes	4.14e-10	BCL6, CCL4, CD14, CR1, EGR1, FYB, HCK, ICAM1, IL6, IL1A, IL1B, IL7R, INDO, INHBA, ITGAM, ITGAX, LCP2, LILRB1, LY96, MMP3, PTGS2, PTPRC, RGS2, SOCS3, SPP1, TLR2, TLR4, TNFRSF1B, TNFSF13B	29			Cellular Movement	homing	homing of lymphocytes	3.09e-08	CCL4, CCL8, CCR1, CXCL10, CXCL11, GNLY, IL8, RGS1, SOCS3, SPP1, THBS2	11
	Cellular Movement	movement	movement of lymphocytes	3.93e-05	CCL2, CCL4, CD69, FYB, HGF, PLAU, PSCDBP, SELE	8			Cellular Development	developmental process	developmental process of antigen presenting cells	4.26e-10	CSF3, CSF2RB, CXCL11, EGR1, HGF, IL6, IL1A, IL1B, IL1RN, INHBA, ITGAM, LILRA6, SOCS3, TLR2, TLR4, TLR8, TNFRSF11B, TREM1	18			Hematological System Development and Function	homing	homing of lymphocytes	3.09e-08	CCL4, CCL8, CCR1, CXCL10, CXCL11, GNLY, IL8, RGS1, SOCS3, SPP1, THBS2	11
	Cellular Movement	cell movement	cell movement of T lymphocytes	3.93e-05	CCL2, CCL4, CCL8, CD86, CXCR7, IL6, SELE, SOCS3	8			Cell-To-Cell Signaling and Interaction	recruitment	recruitment of blood cells	4.53e-10	C5AR1, CCL4, CCR1, CSF3, ICAM1, IL6, IL8, IL1B, IL8RB, SELE, SELL, SELP, SERPINE1, THBS2, TLR2, TLR4	16			Cellular Growth and Proliferation	stimulation	stimulation of blood cells	3.16e-08	C5AR1, CSF3, CXCL5, FGF2, HGF, IL6, IL8, IL11, IL1B, PTPRC	10
	Hematological System Development and Function	cell movement	cell movement of T lymphocytes	3.93e-05	CCL2, CCL4, CCL8, CD86, CXCR7, IL6, SELE, SOCS3	8			Immune Response	activation	activation of mononuclear leukocytes	4.61e-10	CCL4, CD14, CD93, CLEC7A, DOK3, FCGR2A, ICAM1, IL6, IL8, IL1B, LILRA6, LILRB1, LY96, PTPRC, SLC11A1, SPP1, TLR4, TLR8, TNC, TNFRSF1B, TNFSF13B, TREM1	22			Cell-To-Cell Signaling and Interaction	stimulation	stimulation of blood cells	3.16e-08	C5AR1, CSF3, CXCL5, FGF2, HGF, IL6, IL8, IL11, IL1B, PTPRC	10
	Immune Response	cell movement	cell movement of T lymphocytes	3.93e-05	CCL2, CCL4, CCL8, CD86, CXCR7, IL6, SELE, SOCS3	8			Hematological System Development and Function	activation	activation of mononuclear leukocytes	4.61e-10	CCL4, CD14, CD93, CLEC7A, DOK3, FCGR2A, ICAM1, IL6, IL8, IL1B, LILRA6, LILRB1, LY96, PTPRC, SLC11A1, SPP1, TLR4, TLR8, TNC, TNFRSF1B, TNFSF13B, TREM1	22			Viral Function	replication	replication of HIV-1	3.24e-08	CCL4, IL6, IL8, IL1B, PTPRC, S100A8, S100A9, S100A12	8
	Hematological System Development and Function	activation	activation of blood platelets	4.15e-05	ENTPD1, FCER1G, FCGR2A, IL6, LCP2, PLAT	6			Cell-To-Cell Signaling and Interaction	activation	activation of mononuclear leukocytes	4.61e-10	CCL4, CD14, CD93, CLEC7A, DOK3, FCGR2A, ICAM1, IL6, IL8, IL1B, LILRA6, LILRB1, LY96, PTPRC, SLC11A1, SPP1, TLR4, TLR8, TNC, TNFRSF1B, TNFSF13B, TREM1	22			Cellular Growth and Proliferation	proliferation	proliferation of endothelial cells	3.5e-08	CXCL10, FGF2, GBP1 (includes EG:2633), HGF, IL6, IL8, IL1B, INHBA, OSM, PROK2, PTGS2, TFPI	12
	Cell-To-Cell Signaling and Interaction	activation	activation of blood platelets	4.15e-05	ENTPD1, FCER1G, FCGR2A, IL6, LCP2, PLAT	6			Immune and Lymphatic System Development and Function	activation	activation of mononuclear leukocytes	4.61e-10	CCL4, CD14, CD93, CLEC7A, DOK3, FCGR2A, ICAM1, IL6, IL8, IL1B, LILRA6, LILRB1, LY96, PTPRC, SLC11A1, SPP1, TLR4, TLR8, TNC, TNFRSF1B, TNFSF13B, TREM1	22			Cardiovascular System Development and Function	proliferation	proliferation of endothelial cells	3.5e-08	CXCL10, FGF2, GBP1 (includes EG:2633), HGF, IL6, IL8, IL1B, INHBA, OSM, PROK2, PTGS2, TFPI	12
	Cardiovascular System Development and Function	cardiovascular process	cardiovascular process of blood vessel	4.24e-05	CAV1, CCL2, CXCL6, HGF, IL6, INHBA, MME, PLAT, PTGS2, SERPINE1	10			Cellular Movement	movement	movement of tumor cell lines	4.8e-10	ANPEP, CDX2, CSF3, EGR1, FGF2, HGF, IGFBP5, IL6, IL8, IL1A, ITGAM, KLK6, MME, MMP3, OSM, PREX1, SERPINE1, SLC16A4, SOCS3, SOD2, SPP1, TWIST1, WNT5A	23			Carbohydrate Metabolism	binding	binding of polysaccharide	3.97e-08	CXCL10, EMR2, FGF2, IL8, OSM, SPP1, TNC, TNFAIP6	8
	Cellular Movement	chemotaxis	chemotaxis of cell lines	4.28e-05	CCL2, CCL4, CCL8, CD69, CXCL5, HGF, PLAU, PTGS2, SELE	9			Cellular Movement	rolling	rolling of blood cells	4.8e-10	CD14, FCGR2A, ICAM1, IL1B, IL8RA, ITGAM, SELE, SELL, SELP, TLR4, TNFRSF11B	11			Cellular Movement	chemotaxis	chemotaxis of endothelial cell lines	4.02e-08	CXCL10, CXCL11, HGF, IL8, IL8RB, PTGS2	6
	Cellular Movement	migration	migration of muscle cells	4.46e-05	CCL2, HGF, IGFBP5, IL6, PLAT, PLAU, PTGS2	7			Cancer	movement	movement of tumor cell lines	4.8e-10	ANPEP, CDX2, CSF3, EGR1, FGF2, HGF, IGFBP5, IL6, IL8, IL1A, ITGAM, KLK6, MME, MMP3, OSM, PREX1, SERPINE1, SLC16A4, SOCS3, SOD2, SPP1, TWIST1, WNT5A	23			Cardiovascular System Development and Function	chemotaxis	chemotaxis of endothelial cell lines	4.02e-08	CXCL10, CXCL11, HGF, IL8, IL8RB, PTGS2	6
	Skeletal and Muscular System Development and Function	migration	migration of muscle cells	4.46e-05	CCL2, HGF, IGFBP5, IL6, PLAT, PLAU, PTGS2	7			Cell-To-Cell Signaling and Interaction	activation	activation of cell lines	5.63e-10	CD14, CXCL5, CXCL6, FCGR2A, FGF2, HGF, IL8, IL1B, IL8RA, IL8RB, LILRA6, LY96, MMP1 (includes EG:4312), TLR2, TLR4	15			Cellular Development	developmental process	developmental process of bone marrow cells	4.41e-08	CCR1, CSF3, CSF3R, CXCL10, FGF2, FST, IL6, IL8, IL11, IL1B, INHBA, NFE2, THBS2, TREM1	14
	Organismal Injury and Abnormalities	damage	damage of organ	4.47e-05	CCL2, ENTPD1, FCGR2A, IL6, PLAT, PLAU, PTGS2, RDX, SERPINE1	9			Organismal Survival	survival	survival of rodents	5.63e-10	BCL2A1, C5AR1, CCR1, CR1, CSF3, DUSP1, FST, GCA, HGF, ICAM1, IL6, IL11, IL1B, IL7R, IL8RA, IL8RB, INHBA, LY96, PTGES, PTX3, SOCS3, SOSTDC1, TLR2, TLR4	24			Inflammatory Disease	dermatitis	dermatitis	4.44e-08	EREG, IL8, IL1A, IL1B, IL1RN, LCP2, MMP3, OSM, PDE4B, SELE, SOCS3, TWIST1	12
	Inflammatory Disease	airway hyperresponsiveness	airway hyperresponsiveness	4.55e-05	CD86, HGF, IL6, IL13RA2, PLAT, SOCS3	6			Cell-To-Cell Signaling and Interaction	recruitment	recruitment of eukaryotic cells	5.98e-10	C5AR1, CCL4, CCR1, CSF3, FGF2, ICAM1, IL6, IL8, IL1B, IL8RB, SELE, SELL, SELP, SERPINE1, THBS2, TLR2, TLR4	17			Cell-To-Cell Signaling and Interaction	recruitment	recruitment of phagocytes	4.44e-08	C5AR1, CCL4, CCR1, CXCL10, IL8, IL1B, IL8RB, SERPINE1, THBS2, TLR2	10
	Cellular Development	differentiation	differentiation of cell lines	4.85e-05	CSF2RB, FLI1, FST, HGF, IGFBP5, IL6, IL11, INHBA, LCP2, NR3C1, RUNX2, S100A9, SOCS3, ST8SIA4, VCAN	15			Cellular Movement	mobilization	mobilization of eukaryotic cells	6.08e-10	CCL4, CSF3, CXCL14, FPR1, IL8, IL11, IL1B, PROK2, SELE, SELL, SOCS3	11			Dermatological Diseases and Conditions	dermatitis	dermatitis	4.44e-08	EREG, IL8, IL1A, IL1B, IL1RN, LCP2, MMP3, OSM, PDE4B, SELE, SOCS3, TWIST1	12
	Immune and Lymphatic System Development and Function	adhesion	adhesion of mononuclear leukocytes	4.88e-05	CCL2, CCL4, FYB, HGF, IL6, IL11, PLAU, SELE	8			Immune Response	cell movement	cell movement of macrophages	6.24e-10	CCL4, FPR1, FPR2, GNLY, HGF, ICAM1, IL6, IL1B, IL8RA, INHBA, PTGES, PTGS2, SELE, SELL, SPP1, TNFAIP3	16			Immune Response	inflammation	inflammation of organ	4.78e-08	BCL6, C5AR1, CCL4, FCGR2A, IL6, IL1B, MME, PTGS2, SOD2, THBS2, TLR8, TREM1	12
	Hematological System Development and Function	activation	activation of phagocytes	4.88e-05	CCL2, CCL4, CCL8, CXCL6, IL6, LY96, PTGS2, SELE	8			Cellular Movement	cell movement	cell movement of macrophages	6.24e-10	CCL4, FPR1, FPR2, GNLY, HGF, ICAM1, IL6, IL1B, IL8RA, INHBA, PTGES, PTGS2, SELE, SELL, SPP1, TNFAIP3	16			Cellular Growth and Proliferation	growth	growth of cells	4.78e-08	BCL6, BCL2A1, C5AR1, CCL4, CSF3, CSF3R, CXCL10, CYR61, EREG, FGF2, FST, GAS1, HGF, IFIT3, IL6, IL8, IL11, IL24, IL13RA2, IL1A, IL1B, IL1RN, IL7R, IL8RB, INHBA, LCP2, NRCAM, OSM, PRRX1, PTGS2, SERPINE1, SOCS3, SOD2, SPP1, THBS2, TNFAIP6, VCAN, WNT5A	38
	Hematological System Development and Function	adhesion	adhesion of mononuclear leukocytes	4.88e-05	CCL2, CCL4, FYB, HGF, IL6, IL11, PLAU, SELE	8			Hematological System Development and Function	cell movement	cell movement of macrophages	6.24e-10	CCL4, FPR1, FPR2, GNLY, HGF, ICAM1, IL6, IL1B, IL8RA, INHBA, PTGES, PTGS2, SELE, SELL, SPP1, TNFAIP3	16			Cell Death	survival	survival of eukaryotic cells	4.87e-08	BCL6, BCL2A1, CCL4, CCR1, CHI3L1, CSF3, CYR61, FGF2, HGF, IL6, IL8, IL24, IL1A, IL1B, NCF2, NFE2, NRCAM, OSM, PROK2, PTGS2, SERPINE1, SOD2, SPP1, TMEM158, TWIST1	25
	Cell-To-Cell Signaling and Interaction	activation	activation of phagocytes	4.88e-05	CCL2, CCL4, CCL8, CXCL6, IL6, LY96, PTGS2, SELE	8			Inflammatory Disease	rheumatic disease	rheumatic disease of mice	6.3e-10	ALOX5AP, C5AR1, CR1, CSF3, DUSP1, FCER1G, FCGR1A, FCGR2A, IL6, IL1A, IL1B, IL1RN, SOCS3, TNFRSF1B, ZFP36	15			Cellular Development	developmental process	developmental process of antigen presenting cells	4.96e-08	CSF3, CXCL11, HGF, IL6, IL1A, IL1B, IL1RN, INHBA, SOCS3, TLR2, TLR8, TNFRSF11B, TREM1	13
	Cell-To-Cell Signaling and Interaction	adhesion	adhesion of mononuclear leukocytes	4.88e-05	CCL2, CCL4, FYB, HGF, IL6, IL11, PLAU, SELE	8			Connective Tissue Disorders	rheumatic disease	rheumatic disease of mice	6.3e-10	ALOX5AP, C5AR1, CR1, CSF3, DUSP1, FCER1G, FCGR1A, FCGR2A, IL6, IL1A, IL1B, IL1RN, SOCS3, TNFRSF1B, ZFP36	15			Cell-To-Cell Signaling and Interaction	activation	activation of osteoclasts	5e-08	IL6, IL11, IL1A, IL1RN, MMP1 (includes EG:4312), STC1, TNFRSF11B	7
	Immune and Lymphatic System Development and Function	binding	binding of mononuclear leukocytes	5.11e-05	CCL2, CCL4, CD86, FYB, HGF, SELE, TNC	7			Skeletal and Muscular Disorders	rheumatic disease	rheumatic disease of mice	6.3e-10	ALOX5AP, C5AR1, CR1, CSF3, DUSP1, FCER1G, FCGR1A, FCGR2A, IL6, IL1A, IL1B, IL1RN, SOCS3, TNFRSF1B, ZFP36	15			Connective Tissue Development and Function	activation	activation of osteoclasts	5e-08	IL6, IL11, IL1A, IL1RN, MMP1 (includes EG:4312), STC1, TNFRSF11B	7
	Hematological System Development and Function	binding	binding of mononuclear leukocytes	5.11e-05	CCL2, CCL4, CD86, FYB, HGF, SELE, TNC	7			Cell Death	apoptosis	apoptosis of blood cells	6.64e-10	ANPEP, BCL2A1, CASP4, CCL4, CD14, CSF3, EGR1, FCER1G, GADD45B, ICAM1, IL6, IL8, IL1B, IL1RN, IL7R, ITGAM, NAMPT, PTPRC, SOD2, SPP1, THBS2, TLR4, TNFRSF1B, TNFSF13B	24			Skeletal and Muscular System Development and Function	activation	activation of osteoclasts	5e-08	IL6, IL11, IL1A, IL1RN, MMP1 (includes EG:4312), STC1, TNFRSF11B	7
	Cell-To-Cell Signaling and Interaction	binding	binding of mononuclear leukocytes	5.11e-05	CCL2, CCL4, CD86, FYB, HGF, SELE, TNC	7			Inflammatory Disease	inflammatory disorder	inflammatory disorder of cells	7.63e-10	ANPEP, CD14, FCER1G, FGR, FPR1, HCK, ICAM1, ITGAM, ITGAX, LILRA6, TREM1	11			Cellular Movement	chemotaxis	chemotaxis of endothelioma cell lines	5.74e-08	CXCL5, FGF2, IL8, IL8RB, SELE	5
	Cell Morphology	shape change	shape change of eukaryotic cells	5.11e-05	ANTXR1, CCL2, CCL8, EDNRB, FCGR2A, HGF, IL6, PLAU, ROBO1, RUNX2, TNC, WIPF1	12			Cellular Movement	mobilization	mobilization of cells	7.63e-10	CCL4, CSF3, CXCL14, FPR1, IL8, IL11, IL1B, PROK2, SELE, SELL, SOCS3	11			Cancer	chemotaxis	chemotaxis of endothelioma cell lines	5.74e-08	CXCL5, FGF2, IL8, IL8RB, SELE	5
	Cancer	developmental process	developmental process of primary tumor	5.13e-05	CD86, HGF, IGFBP5, IL6, INHBA, MME, MMP3, NR3C1	8			Cell Signaling	flux	flux of calcium	8.34e-10	CCL4, CCR1, CXCL5, FCER1G, FCGR2A, FCGR3B, FGF2, FGR, FPR1, FPR2, HCK, IL6, IL8, IL1B, LCP2, LILRA6, LILRB1, MMP1 (includes EG:4312), TLR2	19			Connective Tissue Disorders	arthritis	arthritis of rodents	5.8e-08	C5AR1, CD69, CSF3, FCGR2A, IL6, IL1A, IL1B, IL1RN, MMP3, MMP10, SOCS3	11
	Cellular Movement	infiltration	infiltration of neutrophils	5.47e-05	CCL4, FCER1G, IL6, PLAT, PTGS2, SELE, SOCS3	7			Molecular Transport	flux	flux of calcium	8.34e-10	CCL4, CCR1, CXCL5, FCER1G, FCGR2A, FCGR3B, FGF2, FGR, FPR1, FPR2, HCK, IL6, IL8, IL1B, LCP2, LILRA6, LILRB1, MMP1 (includes EG:4312), TLR2	19			Connective Tissue Disorders	inflammatory arthropathy	inflammatory arthropathy of rodents	5.8e-08	C5AR1, CD69, CSF3, FCGR2A, IL6, IL1A, IL1B, IL1RN, MMP3, MMP10, SOCS3	11
	Hematological System Development and Function	infiltration	infiltration of neutrophils	5.47e-05	CCL4, FCER1G, IL6, PLAT, PTGS2, SELE, SOCS3	7			Vitamin and Mineral Metabolism	flux	flux of calcium	8.34e-10	CCL4, CCR1, CXCL5, FCER1G, FCGR2A, FCGR3B, FGF2, FGR, FPR1, FPR2, HCK, IL6, IL8, IL1B, LCP2, LILRA6, LILRB1, MMP1 (includes EG:4312), TLR2	19			Inflammatory Disease	arthritis	arthritis of rodents	5.8e-08	C5AR1, CD69, CSF3, FCGR2A, IL6, IL1A, IL1B, IL1RN, MMP3, MMP10, SOCS3	11
	Immune Response	infiltration	infiltration of neutrophils	5.47e-05	CCL4, FCER1G, IL6, PLAT, PTGS2, SELE, SOCS3	7			Cellular Movement	rolling	rolling of eukaryotic cells	9.6e-10	CD14, FCGR2A, ICAM1, IL1B, IL8RA, ITGAM, SELE, SELL, SELP, TLR4, TNFRSF11B	11			Inflammatory Disease	inflammatory arthropathy	inflammatory arthropathy of rodents	5.8e-08	C5AR1, CD69, CSF3, FCGR2A, IL6, IL1A, IL1B, IL1RN, MMP3, MMP10, SOCS3	11
	Cellular Growth and Proliferation	proliferation	proliferation of leukocytes	5.73e-05	CAV1, CCL4, CD86, FYB, IL6, IL7R, INHBA, LCP2, LILRB1, LY96, MMP3, PTGS2, SLAMF7, SOCS3, WIPF1	15			Cellular Growth and Proliferation	formation	formation of osteoclasts	9.6e-10	EGR1, FGF2, IL6, IL11, IL1A, IL1B, INHBA, PTGS2, SOCS3, TNFRSF11B, TNFRSF1B	11			Skeletal and Muscular Disorders	arthritis	arthritis of rodents	5.8e-08	C5AR1, CD69, CSF3, FCGR2A, IL6, IL1A, IL1B, IL1RN, MMP3, MMP10, SOCS3	11
	Immune and Lymphatic System Development and Function	proliferation	proliferation of leukocytes	5.73e-05	CAV1, CCL4, CD86, FYB, IL6, IL7R, INHBA, LCP2, LILRB1, LY96, MMP3, PTGS2, SLAMF7, SOCS3, WIPF1	15			Connective Tissue Development and Function	formation	formation of osteoclasts	9.6e-10	EGR1, FGF2, IL6, IL11, IL1A, IL1B, INHBA, PTGS2, SOCS3, TNFRSF11B, TNFRSF1B	11			Skeletal and Muscular Disorders	inflammatory arthropathy	inflammatory arthropathy of rodents	5.8e-08	C5AR1, CD69, CSF3, FCGR2A, IL6, IL1A, IL1B, IL1RN, MMP3, MMP10, SOCS3	11
	Hematological System Development and Function	proliferation	proliferation of leukocytes	5.73e-05	CAV1, CCL4, CD86, FYB, IL6, IL7R, INHBA, LCP2, LILRB1, LY96, MMP3, PTGS2, SLAMF7, SOCS3, WIPF1	15			Skeletal and Muscular System Development and Function	formation	formation of osteoclasts	9.6e-10	EGR1, FGF2, IL6, IL11, IL1A, IL1B, INHBA, PTGS2, SOCS3, TNFRSF11B, TNFRSF1B	11			Immunological Disease	cell death	cell death of lymphatic system cells	5.86e-08	BCL2A1, CCL4, CD69, CSF3, IL6, IL8, IL11, IL1B, IL1RN, IL7R, INDO, LILRB1, NAMPT, PTPRC, SOD2, SPP1, THBS2, TLR2	18
	Immune Response	proliferation	proliferation of leukocytes	5.73e-05	CAV1, CCL4, CD86, FYB, IL6, IL7R, INHBA, LCP2, LILRB1, LY96, MMP3, PTGS2, SLAMF7, SOCS3, WIPF1	15			Connective Tissue Disorders	connective tissue disorder	connective tissue disorder of mice	1.02e-09	ALOX5AP, C5AR1, CR1, CSF3, DUSP1, FCER1G, FCGR1A, FCGR2A, IL6, IL1A, IL1B, IL1RN, SOCS3, TNFRSF1B, ZFP36	15			Cell Death	cell death	cell death of lymphatic system cells	5.86e-08	BCL2A1, CCL4, CD69, CSF3, IL6, IL8, IL11, IL1B, IL1RN, IL7R, INDO, LILRB1, NAMPT, PTPRC, SOD2, SPP1, THBS2, TLR2	18
	Cell-To-Cell Signaling and Interaction	activation	activation of lymphatic system cells	5.81e-05	CCL2, CCL4, CCL8, CD86, CXCL6, FCER1G, FCGR2A, IL6, LILRB1, LY96, PTGS2, SELE, TNC	13			Hematological System Development and Function	differentiation	differentiation of blood cells	1.06e-09	BCL6, CCR1, CD14, CSF3, CSF2RB, CSF3R, EGR1, FGF2, HLA-DQA1, ICAM1, IL6, IL8, IL13RA2, IL7R, INHBA, ITGAM, LCP2, NFE2, PTGS2, PTPRC, RHOH, SOCS3, THBS2, TLR4, TNFSF13B, TREM1, ZFP36	27			Organismal Injury and Abnormalities	neutrophilia	neutrophilia of mice	6.06e-08	CSF3, IL6, IL8, S100A9, SOCS3, TLR2	6
	Cellular Movement	migration	migration of endothelial cell lines	5.84e-05	CSF2RB, HGF, PTGS2, ROBO1, SDC2, SELE, TNC	7			Cellular Development	differentiation	differentiation of blood cells	1.06e-09	BCL6, CCR1, CD14, CSF3, CSF2RB, CSF3R, EGR1, FGF2, HLA-DQA1, ICAM1, IL6, IL8, IL13RA2, IL7R, INHBA, ITGAM, LCP2, NFE2, PTGS2, PTPRC, RHOH, SOCS3, THBS2, TLR4, TNFSF13B, TREM1, ZFP36	27			Hematological Disease	neutrophilia	neutrophilia of mice	6.06e-08	CSF3, IL6, IL8, S100A9, SOCS3, TLR2	6
	Cellular Movement	chemotaxis	chemotaxis of central nervous system cells	6.43e-05	CAV1, CCL2, IL6, ROBO1	4			Inflammatory Disease	respiratory burst	respiratory burst	1.2e-09	ANPEP, CD14, FCER1G, FGR, FPR1, HCK, ICAM1, ITGAM, ITGAX, LILRA6, TREM1	11			Hematological System Development and Function	adhesion	adhesion of neutrophils	6.76e-08	CSF3R, IL8, IL1B, IL8RB, S100A8, S100A9, SELE, SELL	8
	Cancer	prostate cancer	prostate cancer	6.43e-05	CSF2RB, EBI2, EDNRB, IL6, IL7R, PI15, PSCDBP, PTGS1, PTGS2, S100A9, SOCS3, VCAN	12			Cellular Compromise	respiratory burst	respiratory burst	1.2e-09	ANPEP, CD14, FCER1G, FGR, FPR1, HCK, ICAM1, ITGAM, ITGAX, LILRA6, TREM1	11			Cell-To-Cell Signaling and Interaction	adhesion	adhesion of neutrophils	6.76e-08	CSF3R, IL8, IL1B, IL8RB, S100A8, S100A9, SELE, SELL	8
	Reproductive System Disease	prostate cancer	prostate cancer	6.43e-05	CSF2RB, EBI2, EDNRB, IL6, IL7R, PI15, PSCDBP, PTGS1, PTGS2, S100A9, SOCS3, VCAN	12			Immune Response	cell movement	cell movement of T lymphocytes	1.3e-09	CCL4, CCR1, CXCL11, GNLY, ICAM1, IL6, IL8, IL1B, SELE, SELL, SELP, SOCS3, SPP1, THBS2, TLR4	15			Tissue Development	adhesion	adhesion of neutrophils	6.76e-08	CSF3R, IL8, IL1B, IL8RB, S100A8, S100A9, SELE, SELL	8
	Cellular Movement	homing	homing of cell lines	6.61e-05	CCL2, CCL4, CCL8, CD69, CXCL5, HGF, PLAU, PTGS2, SELE	9			Cellular Movement	cell movement	cell movement of T lymphocytes	1.3e-09	CCL4, CCR1, CXCL11, GNLY, ICAM1, IL6, IL8, IL1B, SELE, SELL, SELP, SOCS3, SPP1, THBS2, TLR4	15			Immune and Lymphatic System Development and Function	adhesion	adhesion of neutrophils	6.76e-08	CSF3R, IL8, IL1B, IL8RB, S100A8, S100A9, SELE, SELL	8
	Immune Response	inflammation	inflammation of mice	6.61e-05	CAV1, FCER1G, IL6, IL11, PTGS1, PTGS2	6			Hematological System Development and Function	cell movement	cell movement of T lymphocytes	1.3e-09	CCL4, CCR1, CXCL11, GNLY, ICAM1, IL6, IL8, IL1B, SELE, SELL, SELP, SOCS3, SPP1, THBS2, TLR4	15			Organismal Survival	survival	survival of rodents	6.76e-08	BCL2A1, C5AR1, CCR1, CSF3, CXCL10, DKK1, FST, HGF, IL6, IL11, IL1B, IL7R, IL8RB, INHBA, PTX3, SOCS3, TLR2	17
	Organismal Injury and Abnormalities	injury	injury of organ	6.67e-05	CCL2, ENTPD1, FCGR2A, IL6, PLAT, PTGS2, RDX	7			Skeletal and Muscular Disorders	skeletal and muscular disorder	skeletal and muscular disorder of rodents	1.33e-09	ALOX5AP, C5AR1, CR1, CSF3, DUSP1, DYSF, FCER1G, FCGR1A, FCGR2A, IL6, IL1A, IL1B, IL1RN, MMP3, SOCS3, TNFRSF11B, TNFRSF1B, ZFP36	18			Immune and Lymphatic System Development and Function	immunological process	immunological process of eukaryotic cells	6.83e-08	C5AR1, CCL4, CCR1, CSF3, FCGR2A, FCGR3B, FPR1, FST, IL8, IL11, LCP2, TREM1	12
	Organismal Survival	survival	survival of mice	6.75e-05	CCL2, FLI1, FST, HGF, IL6, IL11, IL7R, INHBA, LY96, PLAT, PTGS1, SOCS3	12			Immune Response	proliferation	proliferation of T lymphocytes	1.44e-09	CCL4, CD14, CR1, EGR1, FYB, ICAM1, IL6, IL1A, IL1B, IL7R, INDO, INHBA, ITGAM, ITGAX, LCP2, LILRB1, PTGS2, PTPRC, RGS2, SOCS3, SPP1, TLR2, TLR4, TNFRSF1B, TNFSF13B	25			Connective Tissue Disorders	arthritis	arthritis of mammalia	7.51e-08	C5AR1, CD69, CSF3, FCGR2A, IL6, IL1A, IL1B, IL1RN, MMP3, MMP10, SOCS3	11
	Cardiovascular Disease	cardiovascular disorder	cardiovascular disorder of mice	6.77e-05	ABCA1, CCL2, CXCR7, EDNRB, NR3C1, PLAU, PTGS1, PTGS2, SELE, SERPINE1	10			Hematological System Development and Function	proliferation	proliferation of T lymphocytes	1.44e-09	CCL4, CD14, CR1, EGR1, FYB, ICAM1, IL6, IL1A, IL1B, IL7R, INDO, INHBA, ITGAM, ITGAX, LCP2, LILRB1, PTGS2, PTPRC, RGS2, SOCS3, SPP1, TLR2, TLR4, TNFRSF1B, TNFSF13B	25			Inflammatory Disease	arthritis	arthritis of mammalia	7.51e-08	C5AR1, CD69, CSF3, FCGR2A, IL6, IL1A, IL1B, IL1RN, MMP3, MMP10, SOCS3	11
	Connective Tissue Disorders	bursitis	bursitis	7.14e-05	NR3C1, PTGS1, PTGS2	3			Immune and Lymphatic System Development and Function	proliferation	proliferation of T lymphocytes	1.44e-09	CCL4, CD14, CR1, EGR1, FYB, ICAM1, IL6, IL1A, IL1B, IL7R, INDO, INHBA, ITGAM, ITGAX, LCP2, LILRB1, PTGS2, PTPRC, RGS2, SOCS3, SPP1, TLR2, TLR4, TNFRSF1B, TNFSF13B	25			Skeletal and Muscular Disorders	arthritis	arthritis of mammalia	7.51e-08	C5AR1, CD69, CSF3, FCGR2A, IL6, IL1A, IL1B, IL1RN, MMP3, MMP10, SOCS3	11
	Connective Tissue Disorders	parvovirus arthritis	parvovirus arthritis	7.14e-05	CALD1, CCL2, IL6	3			Cellular Growth and Proliferation	proliferation	proliferation of T lymphocytes	1.44e-09	CCL4, CD14, CR1, EGR1, FYB, ICAM1, IL6, IL1A, IL1B, IL7R, INDO, INHBA, ITGAM, ITGAX, LCP2, LILRB1, PTGS2, PTPRC, RGS2, SOCS3, SPP1, TLR2, TLR4, TNFRSF1B, TNFSF13B	25			Immune Response	proliferation	proliferation of bone marrow cells	8.06e-08	CSF3, CSF3R, DKK1, HGF, IL6, IL11, NFE2, SOCS3, SPP1	9
	Inflammatory Disease	bursitis	bursitis	7.14e-05	NR3C1, PTGS1, PTGS2	3			Hematological System Development and Function	adhesion	adhesion of lymphocytes	1.55e-09	CCL4, CXCL11, FYB, HGF, ICAM1, IL6, IL11, OSM, SELE, SELL, SELP, SPP1, THBS2, TLR4	14			Cellular Growth and Proliferation	proliferation	proliferation of bone marrow cells	8.06e-08	CSF3, CSF3R, DKK1, HGF, IL6, IL11, NFE2, SOCS3, SPP1	9
	Inflammatory Disease	parvovirus arthritis	parvovirus arthritis	7.14e-05	CALD1, CCL2, IL6	3			Cell-To-Cell Signaling and Interaction	adhesion	adhesion of lymphocytes	1.55e-09	CCL4, CXCL11, FYB, HGF, ICAM1, IL6, IL11, OSM, SELE, SELL, SELP, SPP1, THBS2, TLR4	14			Immune and Lymphatic System Development and Function	proliferation	proliferation of bone marrow cells	8.06e-08	CSF3, CSF3R, DKK1, HGF, IL6, IL11, NFE2, SOCS3, SPP1	9
	Skeletal and Muscular Disorders	bursitis	bursitis	7.14e-05	NR3C1, PTGS1, PTGS2	3			Immune and Lymphatic System Development and Function	adhesion	adhesion of lymphocytes	1.55e-09	CCL4, CXCL11, FYB, HGF, ICAM1, IL6, IL11, OSM, SELE, SELL, SELP, SPP1, THBS2, TLR4	14			Tissue Morphology	quantity	quantity of blood vessel	8.29e-08	FGF2, HGF, IL6, IL8, IL1B, OSM, THBS2	7
	Skeletal and Muscular Disorders	parvovirus arthritis	parvovirus arthritis	7.14e-05	CALD1, CCL2, IL6	3			Tissue Development	adhesion	adhesion of lymphocytes	1.55e-09	CCL4, CXCL11, FYB, HGF, ICAM1, IL6, IL11, OSM, SELE, SELL, SELP, SPP1, THBS2, TLR4	14			Cardiovascular System Development and Function	quantity	quantity of blood vessel	8.29e-08	FGF2, HGF, IL6, IL8, IL1B, OSM, THBS2	7
	Cancer	developmental process	developmental process of leukemia cell lines	7.14e-05	CSF2RB, FCER1G, FLI1, IL6, IL11, INHBA, NR3C1, RUNX2, SOCS3	9			Hematological Disease	leukocytosis	leukocytosis of mice	1.74e-09	CSF3, CSF3R, IL6, IL8, S100A9, SELE, SELP, SOCS3, TLR2	9			Immunological Disease	apoptosis	apoptosis of bone marrow cells	8.3e-08	BCL2A1, CD69, CSF3, IL6, IL8, IL11, IL1B, IL1RN, NAMPT, SPP1	10
	Infectious Disease	parvovirus arthritis	parvovirus arthritis	7.14e-05	CALD1, CCL2, IL6	3			Hematological Disease	neutrophilia	neutrophilia	1.74e-09	CSF3, IL6, IL8, IL1B, S100A9, SELE, SELL, SOCS3, TLR2	9			Cell Death	apoptosis	apoptosis of bone marrow cells	8.3e-08	BCL2A1, CD69, CSF3, IL6, IL8, IL11, IL1B, IL1RN, NAMPT, SPP1	10
	Hematological Disease	developmental process	developmental process of leukemia cell lines	7.14e-05	CSF2RB, FCER1G, FLI1, IL6, IL11, INHBA, NR3C1, RUNX2, SOCS3	9			Organismal Injury and Abnormalities	leukocytosis	leukocytosis of mice	1.74e-09	CSF3, CSF3R, IL6, IL8, S100A9, SELE, SELP, SOCS3, TLR2	9			Cellular Development	developmental process	developmental process of hematopoietic cells	8.48e-08	CCL4, CSF3, CSF3R, CXCL10, FGF2, IL6, IL8, IL33, IL1A, INHBA, NFE2, THBS2	12
	Cellular Development	developmental process	developmental process of osteoclasts	7.57e-05	CCL2, FCER1G, IL6, IL11, INHBA, SOCS3, TNFRSF11B	7			Organismal Injury and Abnormalities	neutrophilia	neutrophilia	1.74e-09	CSF3, IL6, IL8, IL1B, S100A9, SELE, SELL, SOCS3, TLR2	9			Immune Response	mobilization	mobilization of myeloid cells	8.89e-08	CCL4, CSF3, CXCL10, FPR1, IL8, IL1B	6
	Immune and Lymphatic System Development and Function	accumulation	accumulation of lymphatic system cells	7.77e-05	CCL2, CD86, IL11, MMP3, NR3C1, PLAU, S100A9, SELE	8			Inflammatory Disease	inflammatory disorder	inflammatory disorder of leukocytes	1.77e-09	ANPEP, FCER1G, FGR, FPR1, HCK, ICAM1, ITGAM, ITGAX, LILRA6, TREM1	10			Cellular Movement	mobilization	mobilization of bone marrow cells	8.89e-08	CCL4, CSF3, CXCL10, FPR1, IL8, IL1B	6
	Tissue Development	accumulation	accumulation of lymphatic system cells	7.77e-05	CCL2, CD86, IL11, MMP3, NR3C1, PLAU, S100A9, SELE	8			Inflammatory Disease	respiratory burst	respiratory burst of leukocytes	1.77e-09	ANPEP, FCER1G, FGR, FPR1, HCK, ICAM1, ITGAM, ITGAX, LILRA6, TREM1	10			Cellular Movement	mobilization	mobilization of myeloid cells	8.89e-08	CCL4, CSF3, CXCL10, FPR1, IL8, IL1B	6
	Immune Response	accumulation	accumulation of lymphatic system cells	7.77e-05	CCL2, CD86, IL11, MMP3, NR3C1, PLAU, S100A9, SELE	8			Immunological Disease	inflammatory disorder	inflammatory disorder of leukocytes	1.77e-09	ANPEP, FCER1G, FGR, FPR1, HCK, ICAM1, ITGAM, ITGAX, LILRA6, TREM1	10			Hematological System Development and Function	mobilization	mobilization of myeloid cells	8.89e-08	CCL4, CSF3, CXCL10, FPR1, IL8, IL1B	6
	Immune Response	inflammation	inflammation of rodents	7.83e-05	CAV1, FCER1G, IL6, IL11, PTGS1, PTGS2	6			Immunological Disease	respiratory burst	respiratory burst of leukocytes	1.77e-09	ANPEP, FCER1G, FGR, FPR1, HCK, ICAM1, ITGAM, ITGAX, LILRA6, TREM1	10			Organismal Injury and Abnormalities	neutrophilia	neutrophilia of mammalia	8.89e-08	CSF3, IL6, IL8, S100A9, SOCS3, TLR2	6
	Cellular Movement	influx	influx of neutrophils	8.05e-05	CCL4, CXCL6, FCGR2A, IL6	4			Immunological Disease	disease process	disease process of myeloid cells	1.77e-09	ANPEP, FCER1G, FGR, FPR1, HCK, ICAM1, ITGAM, ITGAX, LILRA6, TREM1	10			Hematological Disease	neutrophilia	neutrophilia of mammalia	8.89e-08	CSF3, IL6, IL8, S100A9, SOCS3, TLR2	6
	Tissue Morphology	quantity	quantity of myeloid cells	8.05e-05	CSF2RB, FLI1, IL6, MMP3, PDE4B, S100A9, SELE, SOCS3	8			Hematological Disease	inflammatory disorder	inflammatory disorder of leukocytes	1.77e-09	ANPEP, FCER1G, FGR, FPR1, HCK, ICAM1, ITGAM, ITGAX, LILRA6, TREM1	10			Hematological System Development and Function	adhesion	adhesion of granulocytes	9.02e-08	CSF3R, FPR2, IL8, IL1B, IL8RB, S100A8, S100A9, SELE, SELL	9
	Immune and Lymphatic System Development and Function	quantity	quantity of myeloid cells	8.05e-05	CSF2RB, FLI1, IL6, MMP3, PDE4B, S100A9, SELE, SOCS3	8			Hematological Disease	respiratory burst	respiratory burst of leukocytes	1.77e-09	ANPEP, FCER1G, FGR, FPR1, HCK, ICAM1, ITGAM, ITGAX, LILRA6, TREM1	10			Cell-To-Cell Signaling and Interaction	adhesion	adhesion of granulocytes	9.02e-08	CSF3R, FPR2, IL8, IL1B, IL8RB, S100A8, S100A9, SELE, SELL	9
	Immune and Lymphatic System Development and Function	activation	activation of antigen presenting cells	8.05e-05	CCL2, CCL4, CCL8, FCER1G, FCGR2A, IL6, LY96, PTGS2	8			Hematological Disease	disease process	disease process of myeloid cells	1.77e-09	ANPEP, FCER1G, FGR, FPR1, HCK, ICAM1, ITGAM, ITGAX, LILRA6, TREM1	10			Tissue Development	adhesion	adhesion of granulocytes	9.02e-08	CSF3R, FPR2, IL8, IL1B, IL8RB, S100A8, S100A9, SELE, SELL	9
	Hematological System Development and Function	quantity	quantity of myeloid cells	8.05e-05	CSF2RB, FLI1, IL6, MMP3, PDE4B, S100A9, SELE, SOCS3	8			Cellular Function and Maintenance	respiratory burst	respiratory burst of leukocytes	1.77e-09	ANPEP, FCER1G, FGR, FPR1, HCK, ICAM1, ITGAM, ITGAX, LILRA6, TREM1	10			Immune and Lymphatic System Development and Function	adhesion	adhesion of granulocytes	9.02e-08	CSF3R, FPR2, IL8, IL1B, IL8RB, S100A8, S100A9, SELE, SELL	9
	Hematological System Development and Function	influx	influx of neutrophils	8.05e-05	CCL4, CXCL6, FCGR2A, IL6	4			Cellular Movement	rolling	rolling of cells	1.82e-09	CD14, FCGR2A, ICAM1, IL1B, IL8RA, ITGAM, SELE, SELL, SELP, TLR4, TNFRSF11B	11			Immune and Lymphatic System Development and Function	immunological process	immunological process of cells	9.71e-08	C5AR1, CCL4, CCR1, CSF3, FCGR2A, FCGR3B, FPR1, FST, IL8, IL11, LCP2, TREM1	12
	Cell-To-Cell Signaling and Interaction	activation	activation of antigen presenting cells	8.05e-05	CCL2, CCL4, CCL8, FCER1G, FCGR2A, IL6, LY96, PTGS2	8			Cell Death	cell death	cell death of phagocytes	1.98e-09	ANPEP, BCL2A1, CASP4, CD14, CSF3, IL6, IL8, IL1B, IL1RN, NAMPT, SOD2, TLR2, TLR4, TNFRSF1B	14			Cell-To-Cell Signaling and Interaction	adhesion	adhesion of bone marrow cells	1.02e-07	CSF3R, FPR2, IL8, IL1B, IL8RB, S100A8, S100A9, SELE, SELL	9
	Immune Response	activation	activation of antigen presenting cells	8.05e-05	CCL2, CCL4, CCL8, FCER1G, FCGR2A, IL6, LY96, PTGS2	8			Immune Response	phagocytosis	phagocytosis of eukaryotic cells	2.05e-09	CD93, CSF3, CSF2RB, CSF3R, FCGR1A, FCGR2A, FCGR3B, FGR, HCK, ITGAM, TLR2, TLR4, TREM1	13			Cell-To-Cell Signaling and Interaction	response	response of cells	1.02e-07	C5AR1, CXCL11, GNLY, IL6, IL8, IL11, IL8RB, LILRB2, MNDA, NCF2, OSM, S100A8, S100A9, SOD2, STC1, TLR2	16
	Immune Response	influx	influx of neutrophils	8.05e-05	CCL4, CXCL6, FCGR2A, IL6	4			Cell-To-Cell Signaling and Interaction	phagocytosis	phagocytosis of eukaryotic cells	2.05e-09	CD93, CSF3, CSF2RB, CSF3R, FCGR1A, FCGR2A, FCGR3B, FGR, HCK, ITGAM, TLR2, TLR4, TREM1	13			Tissue Development	adhesion	adhesion of bone marrow cells	1.02e-07	CSF3R, FPR2, IL8, IL1B, IL8RB, S100A8, S100A9, SELE, SELL	9
	Cellular Development	developmental process	developmental process of mononuclear leukocytes	8.05e-05	CCL2, CD69, CD86, FCER1G, FCGR2A, IL6, IL13RA2, IL7R, INHBA, LCP2, PTGS2, RUNX2, SOCS3, TNFRSF11B	14			Cellular Function and Maintenance	phagocytosis	phagocytosis of eukaryotic cells	2.05e-09	CD93, CSF3, CSF2RB, CSF3R, FCGR1A, FCGR2A, FCGR3B, FGR, HCK, ITGAM, TLR2, TLR4, TREM1	13			Immune and Lymphatic System Development and Function	adhesion	adhesion of bone marrow cells	1.02e-07	CSF3R, FPR2, IL8, IL1B, IL8RB, S100A8, S100A9, SELE, SELL	9
	Organismal Survival	survival	survival of rodents	8.05e-05	CCL2, FLI1, FST, HGF, IL6, IL11, IL7R, INHBA, LY96, PLAT, PTGS1, SOCS3	12			Organismal Survival	survival	survival of mice	2.11e-09	BCL2A1, C5AR1, CCR1, CR1, DUSP1, FST, GCA, HGF, ICAM1, IL6, IL11, IL1B, IL7R, IL8RA, IL8RB, INHBA, LY96, PTGES, PTX3, SOCS3, SOSTDC1, TLR2, TLR4	23			Immune Response	stimulation	stimulation of bone marrow cells	1.03e-07	C5AR1, CSF3, CXCL5, FGF2, IL6, IL8, IL11	7
	Cell-To-Cell Signaling and Interaction	binding	binding of lymphatic system cells	8.46e-05	CCL2, CCL4, CD86, FCGR2A, HGF, S100A9, SELE, TNC	8			Inflammatory Disease	inflammatory disorder	inflammatory disorder of phagocytes	2.28e-09	ANPEP, FCER1G, FGR, FPR1, HCK, ICAM1, ITGAM, ITGAX, LILRA6, TREM1	10			Cellular Growth and Proliferation	stimulation	stimulation of bone marrow cells	1.03e-07	C5AR1, CSF3, CXCL5, FGF2, IL6, IL8, IL11	7
	Organismal Functions	healing	healing of lesion	8.46e-05	IL6, LOX, PLAU, PTGS1, PTGS2, SERPINE1	6			Inflammatory Disease	respiratory burst	respiratory burst of phagocytes	2.28e-09	ANPEP, FCER1G, FGR, FPR1, HCK, ICAM1, ITGAM, ITGAX, LILRA6, TREM1	10			Cell-To-Cell Signaling and Interaction	stimulation	stimulation of bone marrow cells	1.03e-07	C5AR1, CSF3, CXCL5, FGF2, IL6, IL8, IL11	7
	Cell Signaling	cell surface receptor linked signal transduction	cell surface receptor linked signal transduction	8.52e-05	CAV1, CLEC4A, FCER1G, FCGR2A, IGSF6, IL6, IL7R, INHBA, LCP2, LILRB2, LY96, RUNX2, STC1, WIPF1	14			Cell-To-Cell Signaling and Interaction	response	response of cells	2.5e-09	C5AR1, CD14, CSF2RB, CXCL11, DUSP1, GNLY, ICAM1, IL6, IL8, IL11, IL8RB, LILRB2, LY96, MNDA, NCF2, OSM, S100A8, S100A9, SOD2, STC1, TLR2, TLR4	22			Immune and Lymphatic System Development and Function	stimulation	stimulation of bone marrow cells	1.03e-07	C5AR1, CSF3, CXCL5, FGF2, IL6, IL8, IL11	7
	Cellular Development	developmental process	developmental process of leukocytes	8.58e-05	CCL2, CD69, CD86, CSF2RB, FCER1G, FCGR2A, IL6, IL13RA2, IL7R, INHBA, LCP2, PTGS2, RUNX2, SOCS3, TNFRSF11B	15			Hematological System Development and Function	binding	binding of mononuclear leukocytes	2.73e-09	CCL4, CCR1, CXCL11, FGF2, FYB, HGF, ICAM1, IL8, IL1A, ITGAM, SELE, SELL, TNC	13			Gene Expression	activation	activation of synthetic promoter	1.18e-07	CSF3, CSF3R, CXCL6, DKK1, FCGR2A, FGF2, FPR2, HGF, IL6, IL24, IL13RA2, IL1A, IL1B, INHBA, LCP2, PSCDBP, PTGS2, RGS1, SERPINE1, SOCS3, TLR2	21
	Cancer	apoptosis	apoptosis of tumor cell lines	8.67e-05	CAV1, CSF2RB, DKK3, FLI1, FST, GLIPR1, GNG2, HGF, IGFBP5, IL6, INHBA, MME, NR3C1, PLAU, PTGS2, S100A9, SDC2, SOCS3, TNFRSF11B, VCAN	20			Cell-To-Cell Signaling and Interaction	binding	binding of mononuclear leukocytes	2.73e-09	CCL4, CCR1, CXCL11, FGF2, FYB, HGF, ICAM1, IL8, IL1A, ITGAM, SELE, SELL, TNC	13			Connective Tissue Disorders	rheumatic disease	rheumatic disease of rodents	1.22e-07	C5AR1, CD69, CSF3, FCGR2A, IL6, IL1A, IL1B, IL1RN, MMP3, MMP10, SOCS3	11
	Cell Death	apoptosis	apoptosis of tumor cell lines	8.67e-05	CAV1, CSF2RB, DKK3, FLI1, FST, GLIPR1, GNG2, HGF, IGFBP5, IL6, INHBA, MME, NR3C1, PLAU, PTGS2, S100A9, SDC2, SOCS3, TNFRSF11B, VCAN	20			Immune and Lymphatic System Development and Function	binding	binding of mononuclear leukocytes	2.73e-09	CCL4, CCR1, CXCL11, FGF2, FYB, HGF, ICAM1, IL8, IL1A, ITGAM, SELE, SELL, TNC	13			Inflammatory Disease	rheumatic disease	rheumatic disease of rodents	1.22e-07	C5AR1, CD69, CSF3, FCGR2A, IL6, IL1A, IL1B, IL1RN, MMP3, MMP10, SOCS3	11
	Organ Development	organogenesis	organogenesis	8.92e-05	CAV1, CCL2, COL8A1, FLI1, FST, IGFBP5, IL6, IL7R, INHBA, NR3C1, PLAU, PTGS2, RUNX2, VCAN, WNT5A	15			Organismal Injury and Abnormalities	cytosis	cytosis	2.8e-09	CSF3, CSF3R, HBB (includes EG:3043), IL6, IL8, IL1B, MME, NFE2, PDE4B, S100A9, SELE, SELL, SELP, SOCS3, TLR2	15			Inflammatory Disease	inflammatory bowel disease	inflammatory bowel disease	1.22e-07	CSF3R, CXCL10, HSD11B1, IL6, IL13RA2, IL1B, PDE4B, PTGS2, SPP1, TNFRSF11B, TREM1	11
	Skeletal and Muscular Disorders	cell death	cell death of bone cancer cell lines	8.94e-05	DKK3, FLI1, IGFBP5, IL6, INHBA, NR3C1, SDC2	7			Immune and Lymphatic System Development and Function	degranulation	degranulation of eukaryotic cells	2.86e-09	C5AR1, CCL4, CCR1, FCER1G, FCGR2A, FCGR3B, FPR1, HCK, IL8, ITGAM, LCP2, LILRA6, PILRA, TREM1	14			Skeletal and Muscular Disorders	rheumatic disease	rheumatic disease of rodents	1.22e-07	C5AR1, CD69, CSF3, FCGR2A, IL6, IL1A, IL1B, IL1RN, MMP3, MMP10, SOCS3	11
	Cancer	cell death	cell death of bone cancer cell lines	8.94e-05	DKK3, FLI1, IGFBP5, IL6, INHBA, NR3C1, SDC2	7			Cellular Compromise	degranulation	degranulation of eukaryotic cells	2.86e-09	C5AR1, CCL4, CCR1, FCER1G, FCGR2A, FCGR3B, FPR1, HCK, IL8, ITGAM, LCP2, LILRA6, PILRA, TREM1	14			Gastrointestinal Disease	inflammatory bowel disease	inflammatory bowel disease	1.22e-07	CSF3R, CXCL10, HSD11B1, IL6, IL13RA2, IL1B, PDE4B, PTGS2, SPP1, TNFRSF11B, TREM1	11
	Cell Death	cell death	cell death of bone cancer cell lines	8.94e-05	DKK3, FLI1, IGFBP5, IL6, INHBA, NR3C1, SDC2	7			Inflammatory Disease	inflammatory disorder	inflammatory disorder of blood cells	2.88e-09	ANPEP, FCER1G, FGR, FPR1, HCK, ICAM1, ITGAM, ITGAX, LILRA6, TREM1	10			Immune Response	fever	fever	1.28e-07	CCL4, IL6, IL1A, IL1B, IL1RN, PTGS2	6
	Cellular Growth and Proliferation	proliferation	proliferation of endothelial cells	9.23e-05	CAV1, CAV2, HGF, IL6, INHBA, PTGS2, RUNX2, TFPI	8			Inflammatory Disease	inflammatory disorder	inflammatory disorder of lymphatic system cells	2.88e-09	ANPEP, FCER1G, FGR, FPR1, HCK, ICAM1, ITGAM, ITGAX, LILRA6, TREM1	10			Skeletal and Muscular Disorders	disease process	disease process of joint	1.3e-07	GAS1, IL1A, IL1B, OSM, SOCS3, TLR2, TNFAIP6	7
	Cellular Development	differentiation	differentiation of osteocytes	9.23e-05	CCL2, FCER1G, IL6, IL11, INHBA, RUNX2, SOCS3, TNFRSF11B	8			Inflammatory Disease	respiratory burst	respiratory burst of blood cells	2.88e-09	ANPEP, FCER1G, FGR, FPR1, HCK, ICAM1, ITGAM, ITGAX, LILRA6, TREM1	10			Immune Response	accumulation	accumulation of leukocytes	1.32e-07	CCR1, CSF3, CXCL10, IL8, IL11, IL1B, PTX3, S100A8, S100A9, SELE, SELL	11
	Connective Tissue Development and Function	differentiation	differentiation of osteocytes	9.23e-05	CCL2, FCER1G, IL6, IL11, INHBA, RUNX2, SOCS3, TNFRSF11B	8			Inflammatory Disease	respiratory burst	respiratory burst of eukaryotic cells	2.88e-09	ANPEP, FCER1G, FGR, FPR1, HCK, ICAM1, ITGAM, ITGAX, LILRA6, TREM1	10			Hematological System Development and Function	accumulation	accumulation of leukocytes	1.32e-07	CCR1, CSF3, CXCL10, IL8, IL11, IL1B, PTX3, S100A8, S100A9, SELE, SELL	11
	Cardiovascular System Development and Function	proliferation	proliferation of endothelial cells	9.23e-05	CAV1, CAV2, HGF, IL6, INHBA, PTGS2, RUNX2, TFPI	8			Inflammatory Disease	respiratory burst	respiratory burst of lymphatic system cells	2.88e-09	ANPEP, FCER1G, FGR, FPR1, HCK, ICAM1, ITGAM, ITGAX, LILRA6, TREM1	10			Tissue Development	accumulation	accumulation of leukocytes	1.32e-07	CCR1, CSF3, CXCL10, IL8, IL11, IL1B, PTX3, S100A8, S100A9, SELE, SELL	11
	Cell Death	apoptosis	apoptosis of cell lines	9.52e-05	CAV1, CSF2RB, DKK3, EDNRB, FLI1, FST, GLIPR1, GNG2, HGF, IGFBP5, IL6, INHBA, MME, NR3C1, PLAU, PTGS1, PTGS2, QKI (includes EG:9444), S100A9, SDC2, SOCS3, TNFRSF11B, VCAN	23			Immunological Disease	inflammatory disorder	inflammatory disorder of lymphatic system cells	2.88e-09	ANPEP, FCER1G, FGR, FPR1, HCK, ICAM1, ITGAM, ITGAX, LILRA6, TREM1	10			Immune and Lymphatic System Development and Function	accumulation	accumulation of leukocytes	1.32e-07	CCR1, CSF3, CXCL10, IL8, IL11, IL1B, PTX3, S100A8, S100A9, SELE, SELL	11
	Cellular Growth and Proliferation	proliferation	proliferation of hepatoma cell lines	9.6e-05	CAV1, HGF, IL6, INHBA, TFPI2	5			Immunological Disease	respiratory burst	respiratory burst of lymphatic system cells	2.88e-09	ANPEP, FCER1G, FGR, FPR1, HCK, ICAM1, ITGAM, ITGAX, LILRA6, TREM1	10			Connective Tissue Disorders	rheumatic disease	rheumatic disease of mammalia	1.56e-07	C5AR1, CD69, CSF3, FCGR2A, IL6, IL1A, IL1B, IL1RN, MMP3, MMP10, SOCS3	11
	Cancer	proliferation	proliferation of hepatoma cell lines	9.6e-05	CAV1, HGF, IL6, INHBA, TFPI2	5			Immune Response	cell movement	cell movement of mononuclear leukocytes	2.98e-09	CCL4, CCR1, CXCL11, FPR1, FPR2, GNLY, ICAM1, IL6, IL8, IL1B, IL8RA, INHBA, SELE, SELL, SELP, SOCS3, SPP1, THBS2, TLR4	19			Inflammatory Disease	rheumatic disease	rheumatic disease of mammalia	1.56e-07	C5AR1, CD69, CSF3, FCGR2A, IL6, IL1A, IL1B, IL1RN, MMP3, MMP10, SOCS3	11
	Cellular Function and Maintenance	presence	presence of eukaryotic cells	9.6e-05	FCGR2A, HGF, PLAT, SOCS3, TNFRSF11B	5			Cellular Movement	cell movement	cell movement of mononuclear leukocytes	2.98e-09	CCL4, CCR1, CXCL11, FPR1, FPR2, GNLY, ICAM1, IL6, IL8, IL1B, IL8RA, INHBA, SELE, SELL, SELP, SOCS3, SPP1, THBS2, TLR4	19			Organismal Development	quantity	quantity of vessel	1.63e-07	FGF2, HGF, IL6, IL8, IL1B, OSM, THBS2	7
	Hepatic System Disease	proliferation	proliferation of hepatoma cell lines	9.6e-05	CAV1, HGF, IL6, INHBA, TFPI2	5			Hematological System Development and Function	cell movement	cell movement of mononuclear leukocytes	2.98e-09	CCL4, CCR1, CXCL11, FPR1, FPR2, GNLY, ICAM1, IL6, IL8, IL1B, IL8RA, INHBA, SELE, SELL, SELP, SOCS3, SPP1, THBS2, TLR4	19			Immunological Disease	cell death	cell death of bone marrow cells	1.64e-07	BCL2A1, CD69, CSF3, IL6, IL8, IL11, IL1B, IL1RN, NAMPT, SPP1	10
	Tissue Development	developmental process	developmental process of connective tissue	0.000104	CAV1, FCER1G, IL6, IL11, NR3C1, PTGS2, RUNX2, STC1, TNFRSF11B, ZEB1	10			Cellular Movement	invasion	invasion of eukaryotic cells	3.15e-09	ANPEP, CD14, CD53, CHI3L1, CSF3, FGF2, FST, GBP1 (includes EG:2633), HGF, IL8, IL1B, INHBA, KLK6, MMP3, MMP1 (includes EG:4312), NRCAM, OSM, PAPPA, PTGS2, SOD2, SPP1, TFPI2, THBS2, TWIST1, WNT5A	25			Cell Death	cell death	cell death of bone marrow cells	1.64e-07	BCL2A1, CD69, CSF3, IL6, IL8, IL11, IL1B, IL1RN, NAMPT, SPP1	10
	Inflammatory Disease	dermatitis	dermatitis	0.000107	FCER1G, LCP2, MMP3, NR3C1, PDE4B, SELE, SOCS3, ZEB1	8			Cancer	invasion	invasion of eukaryotic cells	3.15e-09	ANPEP, CD14, CD53, CHI3L1, CSF3, FGF2, FST, GBP1 (includes EG:2633), HGF, IL8, IL1B, INHBA, KLK6, MMP3, MMP1 (includes EG:4312), NRCAM, OSM, PAPPA, PTGS2, SOD2, SPP1, TFPI2, THBS2, TWIST1, WNT5A	25			Connective Tissue Disorders	connective tissue disorder	connective tissue disorder of rodents	1.68e-07	C5AR1, CD69, CSF3, FCGR2A, IL6, IL1A, IL1B, IL1RN, MMP3, MMP10, SOCS3	11
	Dermatological Diseases and Conditions	dermatitis	dermatitis	0.000107	FCER1G, LCP2, MMP3, NR3C1, PDE4B, SELE, SOCS3, ZEB1	8			Tissue Development	developmental process	developmental process of bone	3.16e-09	EGR1, FCER1G, FGF2, GADD45B, GAS1, HOXD11, HOXD13, IL6, IL11, IL1A, IL1B, IL1RN, OSM, PTGS2, SPP1, STC1, TNFRSF11B, TNFRSF1B	18			Cellular Growth and Proliferation	growth	growth of central nervous system cells	1.81e-07	FGF2, IL6, IL24, IL1A, IL1B, IL1RN	6
	Cellular Development	development	development of lymphatic system cells	0.000112	CD69, FCER1G, FCGR2A, FST, IL6, IL11, IL7R, LCP2, RUNX2, SOCS3, TNFRSF11B	11			Hematological Disease	leukocytosis	leukocytosis of mammalia	3.24e-09	CSF3, CSF3R, IL6, IL8, S100A9, SELE, SELP, SOCS3, TLR2	9			Cell-To-Cell Signaling and Interaction	adhesion	adhesion of cell lines	1.96e-07	CCL4, CSF3, CXCL10, CYR61, FGF2, HGF, IL6, IL8, IL1A, IL8RB, PSCDBP, SELE, SELL, SPP1, VCAN	15
	Cellular Movement	migration	migration of embryonic cells	0.000117	CCL8, EDNRB, IGFBP5, IL11, VCAN, ZEB2	6			Organismal Injury and Abnormalities	leukocytosis	leukocytosis of mammalia	3.24e-09	CSF3, CSF3R, IL6, IL8, S100A9, SELE, SELP, SOCS3, TLR2	9			Tissue Development	developmental process	developmental process of connective tissue	1.96e-07	FGF2, GAS1, IL6, IL11, IL1A, IL1B, IL1RN, OSM, PRRX1, PTGS2, SPP1, STC1, THBS2, TNFRSF11B	14
	Cellular Movement	movement	movement of embryonic cells	0.000117	CCL8, EDNRB, IGFBP5, IL11, VCAN, ZEB2	6			Cellular Development	differentiation	differentiation of cell lines	3.28e-09	CD14, CSF3, CSF2RB, CSF3R, DUSP1, EGR1, FGF2, FST, HGF, HSD11B1, IGFBP5, IL6, IL11, IL1B, IL1RN, INHBA, ITGAM, LCP2, NR3C2, OSM, RGS2, S100A8, S100A9, SERPINB2, SOCS3, SOSTDC1, SPP1, TNFRSF1B	28			Viral Function	replication	replication of HIV	2.07e-07	CCL4, IL6, IL8, IL1B, PTPRC, S100A8, S100A9, S100A12	8
	Embryonic Development	migration	migration of embryonic cells	0.000117	CCL8, EDNRB, IGFBP5, IL11, VCAN, ZEB2	6			Immune and Lymphatic System Development and Function	degranulation	degranulation of cells	3.56e-09	C5AR1, CCL4, CCR1, FCER1G, FCGR2A, FCGR3B, FPR1, HCK, IL8, ITGAM, LCP2, LILRA6, PILRA, TREM1	14			Viral Function	replication	replication of lentivirus	2.07e-07	CCL4, IL6, IL8, IL1B, PTPRC, S100A8, S100A9, S100A12	8
	Embryonic Development	movement	movement of embryonic cells	0.000117	CCL8, EDNRB, IGFBP5, IL11, VCAN, ZEB2	6			Cellular Compromise	degranulation	degranulation of cells	3.56e-09	C5AR1, CCL4, CCR1, FCER1G, FCGR2A, FCGR3B, FPR1, HCK, IL8, ITGAM, LCP2, LILRA6, PILRA, TREM1	14			Cell-To-Cell Signaling and Interaction	adhesion	adhesion of endothelial cells	2.09e-07	CCL4, CYR61, HGF, IL8, IL1A, IL1B, SELE, SELL, SPP1	9
	Cellular Movement	migration	migration of vascular smooth muscle cells	0.000123	HGF, IGFBP5, IL6, PLAU, PTGS2	5			Cell-To-Cell Signaling and Interaction	stimulation	stimulation of eukaryotic cells	3.76e-09	C5AR1, CSF3, CXCL5, FGF2, HGF, IL6, IL8, IL11, IL1A, IL1B, OSM, PDGFD, PTPRC, TLR4, TYMP	15			Tissue Development	adhesion	adhesion of endothelial cells	2.09e-07	CCL4, CYR61, HGF, IL8, IL1A, IL1B, SELE, SELL, SPP1	9
	Cellular Growth and Proliferation	growth	growth of hepatoma cell lines	0.000123	DKK3, IL6, INHBA, PTGS2, SOCS3	5			Cellular Growth and Proliferation	stimulation	stimulation of eukaryotic cells	3.76e-09	C5AR1, CSF3, CXCL5, FGF2, HGF, IL6, IL8, IL11, IL1A, IL1B, OSM, PDGFD, PTPRC, TLR4, TYMP	15			Cardiovascular System Development and Function	adhesion	adhesion of endothelial cells	2.09e-07	CCL4, CYR61, HGF, IL8, IL1A, IL1B, SELE, SELL, SPP1	9
	Cancer	growth	growth of hepatoma cell lines	0.000123	DKK3, IL6, INHBA, PTGS2, SOCS3	5			Cell Death	survival	survival of cells	3.83e-09	BCL6, BCL2A1, CCL4, CCR1, CHI3L1, CR1, CSF3, CSF2RB, DUSP1, FCER1G, FGF2, FGR, GADD45B, HCK, HGF, ICAM1, IL6, IL8, IL24, IL1A, IL1B, NCF2, NFE2, NFIL3, NRCAM, OSM, PROK2, PTGS2, SERPINB2, SERPINE1, SFRP2, SOD2, SPP1, TNFRSF1B, TNFSF13B, TWIST1	36			Connective Tissue Disorders	connective tissue disorder	connective tissue disorder of mammalia	2.1e-07	C5AR1, CD69, CSF3, FCGR2A, IL6, IL1A, IL1B, IL1RN, MMP3, MMP10, SOCS3	11
	Skeletal and Muscular System Development and Function	migration	migration of vascular smooth muscle cells	0.000123	HGF, IGFBP5, IL6, PLAU, PTGS2	5			Skeletal and Muscular Disorders	skeletal and muscular disorder	skeletal and muscular disorder of mice	3.92e-09	ALOX5AP, C5AR1, CR1, CSF3, DUSP1, DYSF, FCER1G, FCGR1A, FCGR2A, IL6, IL1A, IL1B, IL1RN, SOCS3, TNFRSF11B, TNFRSF1B, ZFP36	17			Immune Response	priming	priming of granulocytes	2.2e-07	CSF3, IL6, IL8, IL1A, IL1B	5
	Hepatic System Disease	growth	growth of hepatoma cell lines	0.000123	DKK3, IL6, INHBA, PTGS2, SOCS3	5			Carbohydrate Metabolism	binding	binding of carbohydrate	3.92e-09	CD14, EMR2, FGF2, IL8, LY96, OSM, SELP, SPP1, TLR4, TNC, TNFAIP6	11			Hematological System Development and Function	priming	priming of granulocytes	2.2e-07	CSF3, IL6, IL8, IL1A, IL1B	5
	Immune Response	fever	fever	0.000125	CCL4, IL6, PTGS1, PTGS2	4			Cell-To-Cell Signaling and Interaction	stimulation	stimulation of cells	4.15e-09	C5AR1, CSF3, CXCL5, FGF2, HGF, IL6, IL8, IL11, IL1A, IL1B, OSM, PDGFD, PTPRC, TLR4, TYMP	15			Cell-To-Cell Signaling and Interaction	priming	priming of granulocytes	2.2e-07	CSF3, IL6, IL8, IL1A, IL1B	5
	Organ Morphology	regeneration	regeneration of organ	0.000125	HGF, IL6, PTGS1, PTGS2	4			Cellular Growth and Proliferation	stimulation	stimulation of cells	4.15e-09	C5AR1, CSF3, CXCL5, FGF2, HGF, IL6, IL8, IL11, IL1A, IL1B, OSM, PDGFD, PTPRC, TLR4, TYMP	15			Immune and Lymphatic System Development and Function	priming	priming of granulocytes	2.2e-07	CSF3, IL6, IL8, IL1A, IL1B	5
	Cellular Movement	chemotaxis	chemotaxis of mononuclear cells	0.000128	CCL2, CCL4, PLAU	3			Inflammatory Disease	inflammatory disorder	inflammatory disorder of neutrophils	4.36e-09	ANPEP, FCER1G, FGR, FPR1, HCK, ICAM1, ITGAM, ITGAX, LILRA6	9			Cell-To-Cell Signaling and Interaction	binding	binding of endothelial cells	2.38e-07	CCR1, CXCL11, IL6, IL8, IL1B, SELE, SELL, SERPINE1	8
	Cellular Movement	invasion	invasion of embryonic cells	0.000128	FST, INHBA, RUNX2	3			Inflammatory Disease	respiratory burst	respiratory burst of neutrophils	4.36e-09	ANPEP, FCER1G, FGR, FPR1, HCK, ICAM1, ITGAM, ITGAX, LILRA6	9			Viral Function	replication	replication of Retroviridae	2.38e-07	CCL4, IL6, IL8, IL1B, PTPRC, S100A8, S100A9, S100A12	8
	Cellular Movement	invasion	invasion of thyroid tumor cell lines	0.000128	HGF, VIM, WNT5A	3			Immunological Disease	inflammatory disorder	inflammatory disorder of neutrophils	4.36e-09	ANPEP, FCER1G, FGR, FPR1, HCK, ICAM1, ITGAM, ITGAX, LILRA6	9			Cardiovascular System Development and Function	binding	binding of endothelial cells	2.38e-07	CCR1, CXCL11, IL6, IL8, IL1B, SELE, SELL, SERPINE1	8
	Cancer	invasion	invasion of embryonic cells	0.000128	FST, INHBA, RUNX2	3			Immunological Disease	respiratory burst	respiratory burst of neutrophils	4.36e-09	ANPEP, FCER1G, FGR, FPR1, HCK, ICAM1, ITGAM, ITGAX, LILRA6	9			Cell-To-Cell Signaling and Interaction	activation	activation of osteocytes	2.46e-07	IL6, IL11, IL1A, IL1RN, MMP1 (includes EG:4312), STC1, TNFRSF11B	7
	Cancer	invasion	invasion of thyroid tumor cell lines	0.000128	HGF, VIM, WNT5A	3			Hematological Disease	inflammatory disorder	inflammatory disorder of neutrophils	4.36e-09	ANPEP, FCER1G, FGR, FPR1, HCK, ICAM1, ITGAM, ITGAX, LILRA6	9			Cell Death	survival	survival of cells	2.57e-07	BCL6, BCL2A1, CCL4, CCR1, CHI3L1, CSF3, CYR61, FGF2, HGF, IL6, IL8, IL24, IL1A, IL1B, NCF2, NFE2, NRCAM, OSM, PROK2, PTGS2, SERPINE1, SOD2, SPP1, TMEM158, TWIST1	25
	Hematological System Development and Function	chemotaxis	chemotaxis of mononuclear cells	0.000128	CCL2, CCL4, PLAU	3			Hematological Disease	respiratory burst	respiratory burst of neutrophils	4.36e-09	ANPEP, FCER1G, FGR, FPR1, HCK, ICAM1, ITGAM, ITGAX, LILRA6	9			Cell-To-Cell Signaling and Interaction	activation	activation of connective tissue cells	2.76e-07	IL6, IL11, IL1A, IL1B, IL1RN, MMP1 (includes EG:4312), STC1, TNFRSF11B	8
	Immune Response	chemotaxis	chemotaxis of mononuclear cells	0.000128	CCL2, CCL4, PLAU	3			Cellular Function and Maintenance	respiratory burst	respiratory burst of neutrophils	4.36e-09	ANPEP, FCER1G, FGR, FPR1, HCK, ICAM1, ITGAM, ITGAX, LILRA6	9			Immune Response	activation	activation of antigen presenting cells	2.84e-07	CCL4, CCL8, CSF3, FCGR2A, IL6, IL8, IL1B, PTGS2, SLC11A1, TLR2, TREM1	11
	Endocrine System Disorders	invasion	invasion of thyroid tumor cell lines	0.000128	HGF, VIM, WNT5A	3			Immune Response	recruitment	recruitment of leukocytes	4.45e-09	C5AR1, CCL4, CCR1, CSF3, ICAM1, IL6, IL8, IL1B, IL8RB, SELE, SELL, SELP, SERPINE1, TLR4	14			Cell-To-Cell Signaling and Interaction	activation	activation of antigen presenting cells	2.84e-07	CCL4, CCL8, CSF3, FCGR2A, IL6, IL8, IL1B, PTGS2, SLC11A1, TLR2, TREM1	11
	Embryonic Development	invasion	invasion of embryonic cells	0.000128	FST, INHBA, RUNX2	3			Hematological System Development and Function	recruitment	recruitment of leukocytes	4.45e-09	C5AR1, CCL4, CCR1, CSF3, ICAM1, IL6, IL8, IL1B, IL8RB, SELE, SELL, SELP, SERPINE1, TLR4	14			Immune and Lymphatic System Development and Function	activation	activation of antigen presenting cells	2.84e-07	CCL4, CCL8, CSF3, FCGR2A, IL6, IL8, IL1B, PTGS2, SLC11A1, TLR2, TREM1	11
	Organismal Injury and Abnormalities	organismal abnormalities	organismal abnormalities of mice	0.000135	HGF, IL6, IL11, MME, S100A9, SELE, SOCS3	7			Cell-To-Cell Signaling and Interaction	recruitment	recruitment of leukocytes	4.45e-09	C5AR1, CCL4, CCR1, CSF3, ICAM1, IL6, IL8, IL1B, IL8RB, SELE, SELL, SELP, SERPINE1, TLR4	14			Cellular Development	developmental process	developmental process of hematopoietic progenitor cells	3.06e-07	CCL4, CSF3, CSF3R, CXCL10, IL6, IL8, IL33, IL1A, INHBA, NFE2, THBS2	11
	Cellular Function and Maintenance	presence	presence of cells	0.000137	FCGR2A, HGF, PLAT, SOCS3, TNFRSF11B	5			Cancer	apoptosis	apoptosis of leukemia cell lines	4.59e-09	BCL2A1, CSF2RB, DUSP1, FGR, GNLY, HGF, IL6, INHBA, ITGAM, NFIL3, PTPRC, S100A8, S100A9, SOD2, TLR2, TNFAIP3, TNFRSF11B, TNFSF13B	18			Organismal Survival	survival	survival of mice	3.1e-07	BCL2A1, C5AR1, CCR1, CXCL10, DKK1, FST, HGF, IL6, IL11, IL1B, IL7R, IL8RB, INHBA, PTX3, SOCS3, TLR2	16
	Reproductive System Development and Function	ovulation	ovulation	0.000137	IL6, INHBA, PLAT, PLAU, PTGS2	5			Hematological Disease	apoptosis	apoptosis of leukemia cell lines	4.59e-09	BCL2A1, CSF2RB, DUSP1, FGR, GNLY, HGF, IL6, INHBA, ITGAM, NFIL3, PTPRC, S100A8, S100A9, SOD2, TLR2, TNFAIP3, TNFRSF11B, TNFSF13B	18			Cellular Growth and Proliferation	stimulation	stimulation of lymphatic system cells	3.24e-07	C5AR1, CSF3, CXCL5, FGF2, IL6, IL8, IL11, IL1B, PTPRC	9
	Connective Tissue Disorders	arthritis	arthritis of mice	0.000142	CCL2, CD69, FCER1G, FCGR2A, IL6, PLAU, SOCS3	7			Cell Death	apoptosis	apoptosis of leukemia cell lines	4.59e-09	BCL2A1, CSF2RB, DUSP1, FGR, GNLY, HGF, IL6, INHBA, ITGAM, NFIL3, PTPRC, S100A8, S100A9, SOD2, TLR2, TNFAIP3, TNFRSF11B, TNFSF13B	18			Cell-To-Cell Signaling and Interaction	adhesion	adhesion of phagocytes	3.24e-07	CSF3R, IL8, IL1A, IL1B, IL8RB, S100A8, S100A9, SELE, SELL	9
	Connective Tissue Disorders	inflammatory arthropathy	inflammatory arthropathy of mice	0.000142	CCL2, CD69, FCER1G, FCGR2A, IL6, PLAU, SOCS3	7			Cell Death	apoptosis	apoptosis of cell lines	4.86e-09	AIM2, BCL6, BCL2A1, CASP4, CDX2, CSF3, CSF2RB, DUSP1, EGR1, FAP, FGF2, FGR, FST, GADD45B, GNLY, GPR65, HGF, IGFBP5, IL6, IL8, IL24, IL1A, IL1B, INHBA, ITGAM, MME, NFIL3, PTGS2, PTPRC, S100A8, S100A9, SFRP2, SOCS3, SOD2, SPP1, TLR2, TLR4, TNFAIP3, TNFRSF10C, TNFRSF11B, TNFRSF1B, TNFSF13B, TWIST1, TYMP	44			Cell-To-Cell Signaling and Interaction	stimulation	stimulation of lymphatic system cells	3.24e-07	C5AR1, CSF3, CXCL5, FGF2, IL6, IL8, IL11, IL1B, PTPRC	9
	Inflammatory Disease	arthritis	arthritis of mice	0.000142	CCL2, CD69, FCER1G, FCGR2A, IL6, PLAU, SOCS3	7			Cell-To-Cell Signaling and Interaction	adhesion	adhesion of endothelial cells	4.89e-09	CCL4, HGF, ICAM1, IL8, IL1A, IL1B, ITGAM, ITGAX, SELE, SELL, SELP, SPP1	12			Immune Response	mobilization	mobilization of leukocytes	3.35e-07	CCL4, CSF3, CXCL10, FPR1, IL8, IL1B	6
	Inflammatory Disease	inflammatory arthropathy	inflammatory arthropathy of mice	0.000142	CCL2, CD69, FCER1G, FCGR2A, IL6, PLAU, SOCS3	7			Tissue Development	adhesion	adhesion of endothelial cells	4.89e-09	CCL4, HGF, ICAM1, IL8, IL1A, IL1B, ITGAM, ITGAX, SELE, SELL, SELP, SPP1	12			Cellular Movement	mobilization	mobilization of leukocytes	3.35e-07	CCL4, CSF3, CXCL10, FPR1, IL8, IL1B	6
	Skeletal and Muscular Disorders	arthritis	arthritis of mice	0.000142	CCL2, CD69, FCER1G, FCGR2A, IL6, PLAU, SOCS3	7			Cardiovascular System Development and Function	adhesion	adhesion of endothelial cells	4.89e-09	CCL4, HGF, ICAM1, IL8, IL1A, IL1B, ITGAM, ITGAX, SELE, SELL, SELP, SPP1	12			Hematological System Development and Function	mobilization	mobilization of leukocytes	3.35e-07	CCL4, CSF3, CXCL10, FPR1, IL8, IL1B	6
	Skeletal and Muscular Disorders	inflammatory arthropathy	inflammatory arthropathy of mice	0.000142	CCL2, CD69, FCER1G, FCGR2A, IL6, PLAU, SOCS3	7			Cellular Development	development	development of cells	5.39e-09	ANPEP, BASP1, BCL6, CCL4, CSF3, CSF3R, CXCL11, DUSP1, EGR1, FCER1G, FCGR2A, FGF2, FGR, FST, HBB (includes EG:3043), HCK, HGF, HOXB13, ICAM1, IL6, IL8, IL11, IL1A, IL1B, IL1RN, IL7R, IL8RB, INHBA, ITGAM, KCNJ2, LCP2, OSM, PTPRC, SATB2, SELL, SOCS3, SPP1, STC1, THBS2, TNC, TNFRSF11B, TNFSF13B	42			Cancer	malignant tumor	malignant tumor	3.35e-07	AIM2, BCL6, COL12A1, COL7A1, CSF3R, CXCL10, CXCL14, CYR61, FGF2, GAS1, HGF, HSD11B1, IFI44L, IFIT3, IL6, IL13RA2, IL1A, IL1B, IL1RN, IL8RB, INHBA, MME, MMP3, MMP10, PTGS2, PTPRC, S100A8, S100A9, SOCS3, SPP1, TFPI2, TNC, TWIST1, VCAN, WNT5A	35
	Cellular Movement	influx	influx of phagocytes	0.000152	CCL4, CXCL6, FCGR2A, IL6	4			Cancer	cell death	cell death of leukemia cell lines	5.55e-09	BCL2A1, CSF2RB, DUSP1, FGR, GNLY, HGF, HLA-DRB4, IL6, INHBA, ITGAM, NFIL3, PTPRC, S100A8, S100A9, SOD2, TLR2, TNFAIP3, TNFRSF11B, TNFSF13B	19			Immune Response	mobilization	mobilization of neutrophils	3.81e-07	CCL4, CSF3, FPR1, IL8, IL1B	5
	Ophthalmic Disease	choroidal neovascularization	choroidal neovascularization	0.000152	NR3C1, PLAU, PTGS1, PTGS2	4			Hematological Disease	cell death	cell death of leukemia cell lines	5.55e-09	BCL2A1, CSF2RB, DUSP1, FGR, GNLY, HGF, HLA-DRB4, IL6, INHBA, ITGAM, NFIL3, PTPRC, S100A8, S100A9, SOD2, TLR2, TNFAIP3, TNFRSF11B, TNFSF13B	19			Cellular Movement	mobilization	mobilization of neutrophils	3.81e-07	CCL4, CSF3, FPR1, IL8, IL1B	5
	Cancer	developmental process	developmental process of hepatoma cell lines	0.000153	DKK3, IL6, INHBA, PTGS2, SOCS3	5			Cell Death	cell death	cell death of leukemia cell lines	5.55e-09	BCL2A1, CSF2RB, DUSP1, FGR, GNLY, HGF, HLA-DRB4, IL6, INHBA, ITGAM, NFIL3, PTPRC, S100A8, S100A9, SOD2, TLR2, TNFAIP3, TNFRSF11B, TNFSF13B	19			Hematological System Development and Function	mobilization	mobilization of neutrophils	3.81e-07	CCL4, CSF3, FPR1, IL8, IL1B	5
	Cell-To-Cell Signaling and Interaction	binding	binding of kidney cell lines	0.000153	ABCA1, CAV1, FCGR2A, INHBA, SDC2	5			Immune Response	inflammation	inflammation of mice	5.66e-09	ALOX5AP, CD14, FCER1G, IL6, IL11, PTGS2, SELL, TLR4, TNFAIP3, TNFRSF1B, ZFP36	11			Cardiovascular System Development and Function	cardiovascular process	cardiovascular process of blood vessel	3.81e-07	CXCL6, CYR61, FGF2, HGF, IL6, IL8, IL1B, IL1RN, INHBA, MME, PTGS2, SERPINE1, THBS2	13
	Hematological Disease	thrombocytopenia	thrombocytopenia	0.000153	FCER1G, FCGR2A, NR3C1, PTGS1, PTGS2	5			Inflammatory Disease	inflammatory disorder	inflammatory disorder of eukaryotic cells	5.71e-09	ANPEP, FCER1G, FGR, FPR1, HCK, ICAM1, ITGAM, ITGAX, LILRA6, TREM1	10			Immune Response	recruitment	recruitment of granulocytes	4e-07	C5AR1, CCL4, CCR1, CXCL10, IL8, IL1B, IL8RB, SELE, SERPINE1	9
	Hepatic System Disease	developmental process	developmental process of hepatoma cell lines	0.000153	DKK3, IL6, INHBA, PTGS2, SOCS3	5			Cell Signaling	release	release of calcium	5.83e-09	CCL4, FCER1G, FCGR1A, FCGR2A, FPR1, IL6, IL8, IL1A, IL1B, IL8RB, OSM, PTPRC, RGS2, SPP1, TLR2, TNFRSF11B	16			Hematological System Development and Function	recruitment	recruitment of granulocytes	4e-07	C5AR1, CCL4, CCR1, CXCL10, IL8, IL1B, IL8RB, SELE, SERPINE1	9
	Renal and Urological System Development and Function	binding	binding of kidney cell lines	0.000153	ABCA1, CAV1, FCGR2A, INHBA, SDC2	5			Molecular Transport	release	release of calcium	5.83e-09	CCL4, FCER1G, FCGR1A, FCGR2A, FPR1, IL6, IL8, IL1A, IL1B, IL8RB, OSM, PTPRC, RGS2, SPP1, TLR2, TNFRSF11B	16			Cell-To-Cell Signaling and Interaction	recruitment	recruitment of granulocytes	4e-07	C5AR1, CCL4, CCR1, CXCL10, IL8, IL1B, IL8RB, SELE, SERPINE1	9
	Cellular Movement	chemotaxis	chemotaxis of tumor cell lines	0.000158	CCL2, CCL4, CCL8, CD69, CXCL5, HGF, SELE	7			Vitamin and Mineral Metabolism	release	release of calcium	5.83e-09	CCL4, FCER1G, FCGR1A, FCGR2A, FPR1, IL6, IL8, IL1A, IL1B, IL8RB, OSM, PTPRC, RGS2, SPP1, TLR2, TNFRSF11B	16			Carbohydrate Metabolism	binding	binding of carbohydrate	4.16e-07	CXCL10, EMR2, FGF2, IL8, OSM, SPP1, TNC, TNFAIP6	8
	Cancer	chemotaxis	chemotaxis of tumor cell lines	0.000158	CCL2, CCL4, CCL8, CD69, CXCL5, HGF, SELE	7			Cell-To-Cell Signaling and Interaction	attachment	attachment of cells	6.7e-09	CSF2RB, EGR1, EMR2, ICAM1, IL1B, ITGAM, ITGAX, SELE, SELL, SERPINE1, SPP1, TFPI2, THBS2	13			Cell Death	apoptosis	apoptosis of cell lines	4.23e-07	AIM2, BCL6, BCL2A1, CSF3, CYR61, DKK1, FAP, FGF2, FST, GNLY, HGF, IL6, IL8, IL24, IL1A, IL1B, INHBA, MME, PTGS2, PTPRC, S100A8, S100A9, SOCS3, SOD2, SPP1, TLR2, TNFRSF10C, TNFRSF11B, TWIST1, VCAN	30
	Immune and Lymphatic System Development and Function	degranulation	degranulation of eukaryotic cells	0.000158	CCL4, ENTPD1, FCER1G, FCGR2A, LCP2, PLAT, WIPF1	7			Tissue Development	formation	formation of connective tissue	6.7e-09	CHRDL2, FGF2, FST, ICAM1, IGFBP5, IL6, IL11, IL1RN, PTGES, PTGS2, SELL, SPP1, STC1	13			Cellular Growth and Proliferation	growth	growth of tumor cells	4.34e-07	CSF3, CSF3R, FGF2, FST, HGF, IL6, IL24, IL13RA2, IL1B, INHBA, OSM	11
	Cellular Compromise	degranulation	degranulation of eukaryotic cells	0.000158	CCL4, ENTPD1, FCER1G, FCGR2A, LCP2, PLAT, WIPF1	7			Immunological Disease	cell death	cell death of leukocytes	7.13e-09	ANPEP, BCL2A1, CASP4, CCL4, CSF3, EGR1, FCER1G, GADD45B, HLA-DRB4, ICAM1, IL6, IL8, IL1B, IL1RN, IL7R, INDO, ITGAM, NAMPT, PTPRC, THBS2, TNFRSF1B, TNFSF13B	22			Cancer	growth	growth of tumor cells	4.34e-07	CSF3, CSF3R, FGF2, FST, HGF, IL6, IL24, IL13RA2, IL1B, INHBA, OSM	11
	Cancer	cell death	cell death of tumor cell lines	0.000179	CAV1, CSF2RB, DKK3, FLI1, FST, GLIPR1, GNG2, HGF, IGFBP5, IL6, INHBA, MME, NR3C1, PLAU, PTGS2, RDX, S100A9, SDC2, SOCS3, TNFRSF11B, VCAN	21			Immunological Disease	disease process	disease process of bone marrow cells	7.13e-09	ANPEP, FCER1G, FGR, FPR1, HCK, ICAM1, ITGAM, ITGAX, LILRA6, TREM1	10			Cell-To-Cell Signaling and Interaction	recruitment	recruitment of bone marrow cells	4.42e-07	C5AR1, CCL4, CCR1, CXCL10, IL8, IL1B, IL8RB, SELE, SERPINE1	9
	Immune and Lymphatic System Development and Function	degranulation	degranulation of cells	0.000179	CCL4, ENTPD1, FCER1G, FCGR2A, LCP2, PLAT, WIPF1	7			Hematological Disease	cell death	cell death of leukocytes	7.13e-09	ANPEP, BCL2A1, CASP4, CCL4, CSF3, EGR1, FCER1G, GADD45B, HLA-DRB4, ICAM1, IL6, IL8, IL1B, IL1RN, IL7R, INDO, ITGAM, NAMPT, PTPRC, THBS2, TNFRSF1B, TNFSF13B	22			Immunological Disease	apoptosis	apoptosis of lymphatic system cells	5.13e-07	BCL2A1, CCL4, CD69, CSF3, IL6, IL8, IL11, IL1B, IL1RN, IL7R, LILRB1, NAMPT, PTPRC, SOD2, SPP1, THBS2	16
	Cell Death	cell death	cell death of tumor cell lines	0.000179	CAV1, CSF2RB, DKK3, FLI1, FST, GLIPR1, GNG2, HGF, IGFBP5, IL6, INHBA, MME, NR3C1, PLAU, PTGS2, RDX, S100A9, SDC2, SOCS3, TNFRSF11B, VCAN	21			Cell Death	cell death	cell death of leukocytes	7.13e-09	ANPEP, BCL2A1, CASP4, CCL4, CSF3, EGR1, FCER1G, GADD45B, HLA-DRB4, ICAM1, IL6, IL8, IL1B, IL1RN, IL7R, INDO, ITGAM, NAMPT, PTPRC, THBS2, TNFRSF1B, TNFSF13B	22			Cell Death	apoptosis	apoptosis of lymphatic system cells	5.13e-07	BCL2A1, CCL4, CD69, CSF3, IL6, IL8, IL11, IL1B, IL1RN, IL7R, LILRB1, NAMPT, PTPRC, SOD2, SPP1, THBS2	16
	Cellular Compromise	degranulation	degranulation of cells	0.000179	CCL4, ENTPD1, FCER1G, FCGR2A, LCP2, PLAT, WIPF1	7			Hematological System Development and Function	quantity	quantity of lymphocytes	7.42e-09	BCL2A1, C5AR1, CSF3, CSF2RB, EGR1, FCER1G, FCGR1A, FCGR2A, HLA-DQA1, ICAM1, IL6, IL7R, INHBA, ITGAM, LCP2, OSM, PTPRC, RHOH, SELE, SELL, TLR2, TNFRSF1B, TNFSF13B	23			Immune Response	production	production of neutrophils	5.26e-07	CSF3, IL6, IL8, IL11	4
	Cellular Movement	migration	migration of mononuclear leukocytes	0.000182	CCL2, CCL4, CD69, FYB, HGF, PLAU, PSCDBP, SELE	8			Immune and Lymphatic System Development and Function	quantity	quantity of lymphocytes	7.42e-09	BCL2A1, C5AR1, CSF3, CSF2RB, EGR1, FCER1G, FCGR1A, FCGR2A, HLA-DQA1, ICAM1, IL6, IL7R, INHBA, ITGAM, LCP2, OSM, PTPRC, RHOH, SELE, SELL, TLR2, TNFRSF1B, TNFSF13B	23			Hematological System Development and Function	production	production of neutrophils	5.26e-07	CSF3, IL6, IL8, IL11	4
	Cellular Movement	movement	movement of mononuclear leukocytes	0.000182	CCL2, CCL4, CD69, FYB, HGF, PLAU, PSCDBP, SELE	8			Tissue Morphology	quantity	quantity of lymphocytes	7.42e-09	BCL2A1, C5AR1, CSF3, CSF2RB, EGR1, FCER1G, FCGR1A, FCGR2A, HLA-DQA1, ICAM1, IL6, IL7R, INHBA, ITGAM, LCP2, OSM, PTPRC, RHOH, SELE, SELL, TLR2, TNFRSF1B, TNFSF13B	23			Cellular Growth and Proliferation	production	production of neutrophils	5.26e-07	CSF3, IL6, IL8, IL11	4
	Cellular Movement	influx	influx of granulocytes	0.000184	CCL4, CXCL6, FCGR2A, IL6	4			Free Radical Scavenging	production	production of superoxide	7.67e-09	CSF3, FGR, FPR1, HCK, IL8, IL1B, IL8RA, ITGAM, ITGAX, NCF2, SELP, SOD2	12			Immune and Lymphatic System Development and Function	production	production of neutrophils	5.26e-07	CSF3, IL6, IL8, IL11	4
	Hematological System Development and Function	influx	influx of granulocytes	0.000184	CCL4, CXCL6, FCGR2A, IL6	4			Cellular Movement	invasion	invasion of cells	7.99e-09	ANPEP, CD14, CD53, CHI3L1, CSF3, FGF2, FST, GBP1 (includes EG:2633), HGF, IL8, IL1B, INHBA, KLK6, MMP3, MMP1 (includes EG:4312), NRCAM, OSM, PAPPA, PTGS2, SOD2, SPP1, TFPI2, THBS2, TWIST1, WNT5A	25			Immunological Disease	apoptosis	apoptosis of granulocytes	5.43e-07	BCL2A1, CD69, CSF3, IL6, IL8, IL1B, IL1RN, NAMPT	8
	Immune Response	influx	influx of granulocytes	0.000184	CCL4, CXCL6, FCGR2A, IL6	4			Cancer	invasion	invasion of cells	7.99e-09	ANPEP, CD14, CD53, CHI3L1, CSF3, FGF2, FST, GBP1 (includes EG:2633), HGF, IL8, IL1B, INHBA, KLK6, MMP3, MMP1 (includes EG:4312), NRCAM, OSM, PAPPA, PTGS2, SOD2, SPP1, TFPI2, THBS2, TWIST1, WNT5A	25			Cell Death	apoptosis	apoptosis of granulocytes	5.43e-07	BCL2A1, CD69, CSF3, IL6, IL8, IL1B, IL1RN, NAMPT	8
	Cellular Movement	infiltration	infiltration of leukocytes	0.000188	CCL2, CCL4, CD86, FCER1G, IL6, PLAT, PTGS2, SELE, SOCS3	9			Immune Response	inflammation	inflammation of rodents	8.04e-09	ALOX5AP, CD14, FCER1G, IL6, IL11, PTGS2, SELL, TLR4, TNFAIP3, TNFRSF1B, ZFP36	11			Hematological Disease	apoptosis	apoptosis of granulocytes	5.43e-07	BCL2A1, CD69, CSF3, IL6, IL8, IL1B, IL1RN, NAMPT	8
	Hematological System Development and Function	infiltration	infiltration of leukocytes	0.000188	CCL2, CCL4, CD86, FCER1G, IL6, PLAT, PTGS2, SELE, SOCS3	9			Organismal Injury and Abnormalities	pathogenesis	pathogenesis	8.24e-09	BCL2A1, CD14, CSF3, EGR1, HLA-DRB4, IL11, IL1B, S100A8, S100A9, SOCS3, SOD2, SPP1, TLR2, TLR4, TNFRSF1B	15			Infectious Disease	severe acute respiratory syndrome	severe acute respiratory syndrome	5.52e-07	ACSL1, CLEC4E, FPR1, IL6, MNDA, NFE2, S100A9, S100A12, SLC2A3, TLR2	10
	Immune Response	infiltration	infiltration of leukocytes	0.000188	CCL2, CCL4, CD86, FCER1G, IL6, PLAT, PTGS2, SELE, SOCS3	9			Cell-To-Cell Signaling and Interaction	recruitment	recruitment of lymphatic system cells	8.67e-09	C5AR1, CCL4, CCR1, CSF3, ICAM1, IL8, IL1B, IL8RB, SELE, SELP, SERPINE1, THBS2, TLR2, TLR4	14			Respiratory Disease	severe acute respiratory syndrome	severe acute respiratory syndrome	5.52e-07	ACSL1, CLEC4E, FPR1, IL6, MNDA, NFE2, S100A9, S100A12, SLC2A3, TLR2	10
	Cellular Movement	cell movement	cell movement of astrocytes	0.000208	CAV1, CCL2, IL6	3			Immunological Disease	cell death	cell death of bone marrow cells	9.77e-09	ANPEP, BCL2A1, CSF3, EGR1, GADD45B, IL6, IL8, IL11, IL1B, IL1RN, ITGAM, NAMPT, SPP1	13			Cell-To-Cell Signaling and Interaction	activation	activation of cell lines	6e-07	CXCL5, CXCL6, FCGR2A, FGF2, HGF, IL8, IL1B, IL8RB, MMP1 (includes EG:4312), TLR2	10
	Tissue Morphology	repair	repair of wound	0.000208	FST, PLAT, PLAU	3			Cell Death	cell death	cell death of bone marrow cells	9.77e-09	ANPEP, BCL2A1, CSF3, EGR1, GADD45B, IL6, IL8, IL11, IL1B, IL1RN, ITGAM, NAMPT, SPP1	13			Dermatological Diseases and Conditions	dermatological disorder	dermatological disorder of mice	6.01e-07	EREG, FCGR2A, IL8, IL1A, IL1B, MMP1 (includes EG:4312), PTGS2, SELE, SELL	9
	Organismal Injury and Abnormalities	formation	formation of scar tissue	0.000208	PLAU, PTGS2, VIM	3			Cancer	growth	growth of tumor cells	1e-08	CSF3, CSF3R, DUSP1, EGR1, FGF2, FST, HGF, IGFBP5, IL6, IL24, IL13RA2, IL1B, INHBA, OSM, TNFSF13B	15			Cellular Growth and Proliferation	growth	growth of blood cells	6.11e-07	C5AR1, CCL4, CSF3, CXCL10, HGF, IL6, IL8, IL1A, IL1B, IL7R, INHBA, LCP2	12
	Organismal Injury and Abnormalities	repair	repair of wound	0.000208	FST, PLAT, PLAU	3			Cellular Growth and Proliferation	growth	growth of tumor cells	1e-08	CSF3, CSF3R, DUSP1, EGR1, FGF2, FST, HGF, IGFBP5, IL6, IL24, IL13RA2, IL1B, INHBA, OSM, TNFSF13B	15			Cellular Development	growth	growth of blood cells	6.11e-07	C5AR1, CCL4, CSF3, CXCL10, HGF, IL6, IL8, IL1A, IL1B, IL7R, INHBA, LCP2	12
	Cellular Movement	homing	homing of tumor cell lines	0.000209	CCL2, CCL4, CCL8, CD69, CXCL5, HGF, SELE	7			Cellular Movement	extravasation	extravasation	1.01e-08	ALOX5AP, CCR1, IL1B, IL8RA, ITGAM, MME, SELE, SELL, SELP	9			Immunological Disease	cell death	cell death of granulocytes	6.14e-07	BCL2A1, CD69, CSF3, IL6, IL8, IL1B, IL1RN, NAMPT	8
	Cancer	homing	homing of tumor cell lines	0.000209	CCL2, CCL4, CCL8, CD69, CXCL5, HGF, SELE	7			Hematological System Development and Function	differentiation	differentiation of leukocytes	1.01e-08	BCL6, CCR1, CD14, CSF3, CSF2RB, CSF3R, EGR1, HLA-DQA1, ICAM1, IL6, IL8, IL13RA2, IL7R, INHBA, LCP2, PTGS2, PTPRC, RHOH, SOCS3, TLR4, TNFSF13B, TREM1, ZFP36	23			Cell Death	cell death	cell death of granulocytes	6.14e-07	BCL2A1, CD69, CSF3, IL6, IL8, IL1B, IL1RN, NAMPT	8
	Inflammatory Disease	ulcerative colitis	ulcerative colitis	0.000211	CD86, NR3C1, PDE4B, PTGS1, PTGS2	5			Immune and Lymphatic System Development and Function	differentiation	differentiation of leukocytes	1.01e-08	BCL6, CCR1, CD14, CSF3, CSF2RB, CSF3R, EGR1, HLA-DQA1, ICAM1, IL6, IL8, IL13RA2, IL7R, INHBA, LCP2, PTGS2, PTPRC, RHOH, SOCS3, TLR4, TNFSF13B, TREM1, ZFP36	23			Hematological Disease	cell death	cell death of granulocytes	6.14e-07	BCL2A1, CD69, CSF3, IL6, IL8, IL1B, IL1RN, NAMPT	8
	Gastrointestinal Disease	ulcerative colitis	ulcerative colitis	0.000211	CD86, NR3C1, PDE4B, PTGS1, PTGS2	5			Cellular Development	differentiation	differentiation of leukocytes	1.01e-08	BCL6, CCR1, CD14, CSF3, CSF2RB, CSF3R, EGR1, HLA-DQA1, ICAM1, IL6, IL8, IL13RA2, IL7R, INHBA, LCP2, PTGS2, PTPRC, RHOH, SOCS3, TLR4, TNFSF13B, TREM1, ZFP36	23			Immune Response	accumulation	accumulation of neutrophils	6.24e-07	CSF3, CXCL10, IL8, IL1B, PTX3, S100A8, S100A9	7
	Cell Signaling	mobilization	mobilization of calcium	0.000213	CCL2, CCL4, CCL8, FCER1G, FCGR2A, LCP2, LILRB1, LILRB2, THBD, WIPF1, WNT5A	11			Cellular Movement	extravasation	extravasation of phagocytes	1.02e-08	CCR1, IL1B, IL8RA, SELE, SELL, SELP	6			Hematological System Development and Function	accumulation	accumulation of neutrophils	6.24e-07	CSF3, CXCL10, IL8, IL1B, PTX3, S100A8, S100A9	7
	Molecular Transport	mobilization	mobilization of calcium	0.000213	CCL2, CCL4, CCL8, FCER1G, FCGR2A, LCP2, LILRB1, LILRB2, THBD, WIPF1, WNT5A	11			Cancer	proliferation	proliferation of tumor cell lines	1.07e-08	AIM2, BCL6, CSF3, EGR1, FGF2, FST, HGF, HSD11B1, IGFBP5, IL6, IL8, IL11, IL1A, IL1B, IL8RA, IL8RB, INHBA, KLK6, NFE2, OSM, PTGES, PTGS2, SERPINB2, SERPINE1, SOCS3, SOD2, SPP1, TFPI2, TNFSF13B, WNT5A	30			Tissue Development	accumulation	accumulation of neutrophils	6.24e-07	CSF3, CXCL10, IL8, IL1B, PTX3, S100A8, S100A9	7
	Vitamin and Mineral Metabolism	mobilization	mobilization of calcium	0.000213	CCL2, CCL4, CCL8, FCER1G, FCGR2A, LCP2, LILRB1, LILRB2, THBD, WIPF1, WNT5A	11			Cellular Growth and Proliferation	proliferation	proliferation of tumor cell lines	1.07e-08	AIM2, BCL6, CSF3, EGR1, FGF2, FST, HGF, HSD11B1, IGFBP5, IL6, IL8, IL11, IL1A, IL1B, IL8RA, IL8RB, INHBA, KLK6, NFE2, OSM, PTGES, PTGS2, SERPINB2, SERPINE1, SOCS3, SOD2, SPP1, TFPI2, TNFSF13B, WNT5A	30			Immune and Lymphatic System Development and Function	accumulation	accumulation of neutrophils	6.24e-07	CSF3, CXCL10, IL8, IL1B, PTX3, S100A8, S100A9	7
	Tissue Morphology	quantity	quantity of bone marrow cells	0.000214	CSF2RB, FLI1, IL6, MMP3, PDE4B, S100A9, SELE, SOCS3	8			Organismal Injury and Abnormalities	damage	damage of organ	1.07e-08	CR1, DUSP1, FCGR1A, FCGR2A, FGR, HCK, IL6, IL1B, IL1RN, IL8RB, PTGS2, SELP, SERPINE1, TLR2, TLR4, TNFRSF1B	16			Organismal Functions	healing	healing	6.6e-07	CYR61, EREG, FGF2, IL6, IL24, IL1RN, PTGS2, SERPINE1, SPP1	9
	Immune and Lymphatic System Development and Function	quantity	quantity of bone marrow cells	0.000214	CSF2RB, FLI1, IL6, MMP3, PDE4B, S100A9, SELE, SOCS3	8			Immune Response	accumulation	accumulation of granulocytes	1.13e-08	CR1, CSF3, EGR1, IL8, IL11, IL1B, PTX3, S100A8, S100A9, SELP, TLR4	11			Hematological System Development and Function	development	development of lymphocytes	6.69e-07	BCL6, CD69, CSF3R, DKK1, FCGR2A, IL6, IL1A, IL1B, IL7R, LCP2, OSM, PTPRC, SOCS3	13
	Cell Morphology	shape change	shape change of cells	0.000214	ANTXR1, CCL2, CCL8, EDNRB, FCGR2A, HGF, IL6, PLAU, ROBO1, RUNX2, TNC, WIPF1	12			Hematological System Development and Function	accumulation	accumulation of granulocytes	1.13e-08	CR1, CSF3, EGR1, IL8, IL11, IL1B, PTX3, S100A8, S100A9, SELP, TLR4	11			Immune and Lymphatic System Development and Function	development	development of lymphocytes	6.69e-07	BCL6, CD69, CSF3R, DKK1, FCGR2A, IL6, IL1A, IL1B, IL7R, LCP2, OSM, PTPRC, SOCS3	13
	Cell-To-Cell Signaling and Interaction	binding	binding of embryonic cell lines	0.000218	ABCA1, CAV1, INHBA, SDC2	4			Immune and Lymphatic System Development and Function	accumulation	accumulation of granulocytes	1.13e-08	CR1, CSF3, EGR1, IL8, IL11, IL1B, PTX3, S100A8, S100A9, SELP, TLR4	11			Cellular Development	development	development of lymphocytes	6.69e-07	BCL6, CD69, CSF3R, DKK1, FCGR2A, IL6, IL1A, IL1B, IL7R, LCP2, OSM, PTPRC, SOCS3	13
	Cell-To-Cell Signaling and Interaction	binding	binding of epithelial cell lines	0.000218	ABCA1, CAV1, INHBA, SDC2	4			Tissue Development	accumulation	accumulation of granulocytes	1.13e-08	CR1, CSF3, EGR1, IL8, IL11, IL1B, PTX3, S100A8, S100A9, SELP, TLR4	11			Immune Response	recruitment	recruitment of neutrophils	6.94e-07	C5AR1, CCL4, CCR1, CXCL10, IL8, IL1B, IL8RB, SERPINE1	8
	Embryonic Development	binding	binding of embryonic cell lines	0.000218	ABCA1, CAV1, INHBA, SDC2	4			Cellular Growth and Proliferation	formation	formation of eukaryotic cells	1.22e-08	EGR1, FGF2, FST, HGF, IL6, IL8, IL11, IL1A, IL1B, INHBA, LCP2, NFE2, PAPPA, PTGS2, SELE, SERPINE1, SOCS3, TNFRSF11B, TNFRSF1B	19			Hematological System Development and Function	recruitment	recruitment of neutrophils	6.94e-07	C5AR1, CCL4, CCR1, CXCL10, IL8, IL1B, IL8RB, SERPINE1	8
	Respiratory Disease	respiratory disorder	respiratory disorder	0.000218	ABCA1, CAV1, CCL2, CSF2RB, EDNRB, IL6, NR3C1, PDE4B, PLAT, PLAU, PTGS1, PTGS2, S100A9, SLC2A3	14			Cell Death	apoptosis	apoptosis of phagocytes	1.23e-08	ANPEP, BCL2A1, CASP4, CD14, CSF3, IL6, IL8, IL1B, IL1RN, NAMPT, SOD2, TLR4, TNFRSF1B	13			Cell-To-Cell Signaling and Interaction	recruitment	recruitment of neutrophils	6.94e-07	C5AR1, CCL4, CCR1, CXCL10, IL8, IL1B, IL8RB, SERPINE1	8
	Hair and Skin Development and Function	binding	binding of epithelial cell lines	0.000218	ABCA1, CAV1, INHBA, SDC2	4			Immune Response	proliferation	proliferation of leukocyte cell lines	1.26e-08	CLEC7A, CSF3, CSF2RB, CSF3R, FGF2, HCK, IL6, IL8, IL11, IL13RA2, IL7R, OSM, PTPRC, SOCS3, SPP1, TNFRSF1B	16			Immune Response	cell movement	cell movement of monocytes	7.26e-07	CCL4, CCL8, FPR1, FPR2, GNLY, IL6, IL1B, INHBA, SELE	9
	Cellular Growth and Proliferation	growth	growth of leukemia cell lines	0.000221	FCER1G, IL6, INHBA, NR3C1, RUNX2, SOCS3	6			Hematological System Development and Function	proliferation	proliferation of leukocyte cell lines	1.26e-08	CLEC7A, CSF3, CSF2RB, CSF3R, FGF2, HCK, IL6, IL8, IL11, IL13RA2, IL7R, OSM, PTPRC, SOCS3, SPP1, TNFRSF1B	16			Cellular Movement	cell movement	cell movement of monocytes	7.26e-07	CCL4, CCL8, FPR1, FPR2, GNLY, IL6, IL1B, INHBA, SELE	9
	Cancer	growth	growth of leukemia cell lines	0.000221	FCER1G, IL6, INHBA, NR3C1, RUNX2, SOCS3	6			Immune and Lymphatic System Development and Function	proliferation	proliferation of leukocyte cell lines	1.26e-08	CLEC7A, CSF3, CSF2RB, CSF3R, FGF2, HCK, IL6, IL8, IL11, IL13RA2, IL7R, OSM, PTPRC, SOCS3, SPP1, TNFRSF1B	16			Hematological System Development and Function	cell movement	cell movement of monocytes	7.26e-07	CCL4, CCL8, FPR1, FPR2, GNLY, IL6, IL1B, INHBA, SELE	9
	Hematological Disease	growth	growth of leukemia cell lines	0.000221	FCER1G, IL6, INHBA, NR3C1, RUNX2, SOCS3	6			Cellular Growth and Proliferation	proliferation	proliferation of leukocyte cell lines	1.26e-08	CLEC7A, CSF3, CSF2RB, CSF3R, FGF2, HCK, IL6, IL8, IL11, IL13RA2, IL7R, OSM, PTPRC, SOCS3, SPP1, TNFRSF1B	16			Immunological Disease	apoptosis	apoptosis of neutrophils	7.39e-07	BCL2A1, CSF3, IL6, IL8, IL1B, IL1RN, NAMPT	7
	Cell Signaling	flux	flux of calcium	0.000221	CAV1, CCL2, CCL4, CXCL5, FCER1G, FCGR2A, IL6, LCP2, LILRB1	9			Cell Death	cell death	cell death of cell lines	1.41e-08	AIM2, BCL6, BCL2A1, CASP4, CDX2, CSF3, CSF2RB, DUSP1, EGR1, FAP, FGF2, FGR, FST, GADD45B, GNLY, GPR65, HGF, HLA-DRB4, IGFBP5, IL6, IL8, IL24, IL1A, IL1B, IL1RN, INHBA, ITGAM, MME, NAMPT, NFIL3, PTGS2, PTPRC, S100A8, S100A9, SFRP2, SOCS3, SOD2, SPP1, TLR2, TLR4, TNFAIP3, TNFRSF10C, TNFRSF11B, TNFRSF1B, TNFSF13B, TWIST1, TYMP	47			Cell Death	apoptosis	apoptosis of neutrophils	7.39e-07	BCL2A1, CSF3, IL6, IL8, IL1B, IL1RN, NAMPT	7
	Molecular Transport	flux	flux of calcium	0.000221	CAV1, CCL2, CCL4, CXCL5, FCER1G, FCGR2A, IL6, LCP2, LILRB1	9			Cancer	carcinoma	carcinoma	1.53e-08	AIM2, ANPEP, CASP4, CD14, CDX2, COL7A1, CSF2RB, CST7, CXCL14, DUSP1, EGR1, FGF2, GADD45B, GAS1, GBP2, GPR65, HGF, HLA-DRB4, HOXD11, HSD11B1, IGFBP5, IL6, IL1A, IL8RB, MME, MMP3, PTGES, PTGS2, PTPRC, RNF144B, S100A8, S100A9, SFRP2, SLC16A4, SOCS3, SPP1, TFPI2, TMEM97, TNC, TWIST1, WFDC2, WNT5A	42			Hematological Disease	apoptosis	apoptosis of neutrophils	7.39e-07	BCL2A1, CSF3, IL6, IL8, IL1B, IL1RN, NAMPT	7
	Vitamin and Mineral Metabolism	flux	flux of calcium	0.000221	CAV1, CCL2, CCL4, CXCL5, FCER1G, FCGR2A, IL6, LCP2, LILRB1	9			Dermatological Diseases and Conditions	disease process	disease process of skin	1.58e-08	FCER1G, HGF, ICAM1, IL6, IL1A, LCP2, MMP1 (includes EG:4312), SELE, SELL, SELP, SPP1	11			Cellular Movement	mobilization	mobilization of hematopoietic cells	7.5e-07	CSF3, CXCL10, IL8, IL11, SELE, SELL	6
	Connective Tissue Disorders	rheumatic disease	rheumatic disease of mice	0.000227	CCL2, CD69, FCER1G, FCGR2A, IL6, PLAU, SOCS3	7			Immunological Disease	immunological disorder	immunological disorder of mammalia	1.79e-08	CASP4, CCL4, CCR1, CD14, CSF3, FCER1G, FCGR1A, FCGR2A, HLA-DQA1, HLA-DQB1, IL6, IL8, IL1RN, IL7R, LCP2, NCF2, SELL, SOCS3, SPP1, TLR4, TNFRSF11B	21			Cellular Movement	mobilization	mobilization of hematopoietic progenitor cells	7.5e-07	CSF3, CXCL10, IL8, IL11, SELE, SELL	6
	Inflammatory Disease	rheumatic disease	rheumatic disease of mice	0.000227	CCL2, CD69, FCER1G, FCGR2A, IL6, PLAU, SOCS3	7			Cell-To-Cell Signaling and Interaction	attachment	attachment of eukaryotic cells	1.79e-08	CSF2RB, EGR1, EMR2, ICAM1, IL1B, ITGAM, ITGAX, SELE, SELL, SERPINE1, TFPI2, THBS2	12			Hematological System Development and Function	mobilization	mobilization of hematopoietic cells	7.5e-07	CSF3, CXCL10, IL8, IL11, SELE, SELL	6
	Skeletal and Muscular Disorders	rheumatic disease	rheumatic disease of mice	0.000227	CCL2, CD69, FCER1G, FCGR2A, IL6, PLAU, SOCS3	7			Inflammatory Disease	inflammation	inflammation of mammalia	1.86e-08	ALOX5AP, CD14, FCER1G, IL6, IL11, PTGS2, SELL, TLR4, TNFAIP3, TNFRSF1B, ZFP36	11			Hematological System Development and Function	mobilization	mobilization of hematopoietic progenitor cells	7.5e-07	CSF3, CXCL10, IL8, IL11, SELE, SELL	6
	Cancer	developmental process	developmental process of malignant tumor	0.000227	CD86, HGF, IGFBP5, IL6, INHBA, MME, MMP3	7			Immune Response	inflammation	inflammation of mammalia	1.86e-08	ALOX5AP, CD14, FCER1G, IL6, IL11, PTGS2, SELL, TLR4, TNFAIP3, TNFRSF1B, ZFP36	11			Carbohydrate Metabolism	binding	binding of glycosaminoglycan	7.5e-07	EMR2, FGF2, OSM, SPP1, TNC, TNFAIP6	6
	Tissue Development	formation	formation of endothelial tube	0.000229	CCL2, PLAU, SDC2, SELE, SERPINE1	5			Immunological Disease	disease process	disease process of leukocytes	2.2e-08	ANPEP, FCER1G, FGR, FPR1, HCK, ICAM1, IL6, ITGAM, ITGAX, LILRA6, TREM1	11			Small Molecule Biochemistry	binding	binding of glycosaminoglycan	7.5e-07	EMR2, FGF2, OSM, SPP1, TNC, TNFAIP6	6
	Cell Death	apoptosis	apoptosis of epithelial cells	0.000229	HGF, IL11, MMP3, NR3C1, PLAT, PLAU, PTGS1, PTGS2	8			Hematological Disease	disease process	disease process of leukocytes	2.2e-08	ANPEP, FCER1G, FGR, FPR1, HCK, ICAM1, IL6, ITGAM, ITGAX, LILRA6, TREM1	11			Hematological System Development and Function	quantity	quantity of lymphocytes	7.54e-07	BCL2A1, C5AR1, CD69, CSF3, CXCL10, FCGR2A, IL6, IL7R, INHBA, LCP2, OSM, PSCDBP, PTPRC, SELE, SELL, TLR2	16
	Cardiovascular System Development and Function	formation	formation of endothelial tube	0.000229	CCL2, PLAU, SDC2, SELE, SERPINE1	5			Cellular Movement	mobilization	mobilization of blood cells	2.21e-08	CCL4, CSF3, CXCL14, FPR1, IL8, IL11, IL1B, SELE, SELL	9			Tissue Morphology	quantity	quantity of lymphocytes	7.54e-07	BCL2A1, C5AR1, CD69, CSF3, CXCL10, FCGR2A, IL6, IL7R, INHBA, LCP2, OSM, PSCDBP, PTPRC, SELE, SELL, TLR2	16
	Tissue Development	formation	formation of bone	0.000235	IGFBP5, IL11, PTGS1, PTGS2, RUNX2, STC1	6			Hematological System Development and Function	mobilization	mobilization of blood cells	2.21e-08	CCL4, CSF3, CXCL14, FPR1, IL8, IL11, IL1B, SELE, SELL	9			Immune and Lymphatic System Development and Function	quantity	quantity of lymphocytes	7.54e-07	BCL2A1, C5AR1, CD69, CSF3, CXCL10, FCGR2A, IL6, IL7R, INHBA, LCP2, OSM, PSCDBP, PTPRC, SELE, SELL, TLR2	16
	Skeletal and Muscular System Development and Function	formation	formation of bone	0.000235	IGFBP5, IL11, PTGS1, PTGS2, RUNX2, STC1	6			Tissue Development	formation	formation of granulation tissue	2.41e-08	FST, ICAM1, IL6, PTGES, SELL, SPP1	6			Immunological Disease	immunological disorder	immunological disorder of mammalia	7.74e-07	CCL4, CCR1, CSF3, CXCL10, FCGR2A, IL6, IL8, IL1RN, IL7R, LCP2, NCF2, SELL, SOCS3, SPP1, TNFRSF11B	15
	Connective Tissue Development and Function	formation	formation of bone	0.000235	IGFBP5, IL11, PTGS1, PTGS2, RUNX2, STC1	6			Connective Tissue Development and Function	formation	formation of granulation tissue	2.41e-08	FST, ICAM1, IL6, PTGES, SELL, SPP1	6			Immune Response	chemotaxis	chemotaxis of monocytes	7.74e-07	CCL4, CCL8, FPR1, FPR2, GNLY, IL1B, INHBA, SELE	8
	Cell Morphology	morphology	morphology of cells	0.000248	CAV1, DKK3, EDNRB, FERMT2, HGF, IL6, INHBA, LCP2, NR3C1, SDC2, TNC, VIM, WNT5A	13			Cellular Development	developmental process	developmental process of macrophages	2.48e-08	CSF3, CSF2RB, CXCL11, EGR1, HGF, IL6, IL1RN, INHBA, ITGAM, SOCS3, TLR4, TLR8, TNFRSF11B, TREM1	14			Cellular Movement	chemotaxis	chemotaxis of monocytes	7.74e-07	CCL4, CCL8, FPR1, FPR2, GNLY, IL1B, INHBA, SELE	8
	Cellular Growth and Proliferation	proliferation	proliferation of T lymphocytes	0.000254	CAV1, CCL4, CD86, FYB, IL6, IL7R, INHBA, LCP2, LILRB1, PTGS2, SOCS3, WIPF1	12			Cellular Growth and Proliferation	formation	formation of cells	2.49e-08	EGR1, FGF2, FST, HGF, IL6, IL8, IL11, IL1A, IL1B, INHBA, LCP2, NFE2, PAPPA, PTGS2, SELE, SERPINE1, SOCS3, TNFRSF11B, TNFRSF1B	19			Hematological System Development and Function	chemotaxis	chemotaxis of monocytes	7.74e-07	CCL4, CCL8, FPR1, FPR2, GNLY, IL1B, INHBA, SELE	8
	Immune and Lymphatic System Development and Function	proliferation	proliferation of T lymphocytes	0.000254	CAV1, CCL4, CD86, FYB, IL6, IL7R, INHBA, LCP2, LILRB1, PTGS2, SOCS3, WIPF1	12			Inflammatory Disease	inflammation	inflammation of animal	2.57e-08	ALOX5AP, CD14, FCER1G, IL6, IL11, PTGS2, SELL, TLR4, TNFAIP3, TNFRSF1B, ZFP36	11			Cell Death	cell death	cell death of cell lines	8.4e-07	AIM2, BCL6, BCL2A1, CSF3, CYR61, DKK1, FAP, FGF2, FST, GNLY, HGF, IL6, IL8, IL24, IL1A, IL1B, IL1RN, INHBA, MME, NAMPT, PTGS2, PTPRC, S100A8, S100A9, SOCS3, SOD2, SPP1, TLR2, TNFRSF10C, TNFRSF11B, TWIST1, VCAN	32
	Hematological System Development and Function	proliferation	proliferation of T lymphocytes	0.000254	CAV1, CCL4, CD86, FYB, IL6, IL7R, INHBA, LCP2, LILRB1, PTGS2, SOCS3, WIPF1	12			Immune Response	inflammation	inflammation of animal	2.57e-08	ALOX5AP, CD14, FCER1G, IL6, IL11, PTGS2, SELL, TLR4, TNFAIP3, TNFRSF1B, ZFP36	11			Immunological Disease	cell death	cell death of neutrophils	8.63e-07	BCL2A1, CSF3, IL6, IL8, IL1B, IL1RN, NAMPT	7
	Hematological Disease	bleeding	bleeding of animal	0.000254	ABCA1, FCGR2A, LCP2, PLAT, SERPINE1	5			Immune Response	infiltration	infiltration of macrophages	2.94e-08	CCL4, HGF, ICAM1, IL6, IL1B, PTGES, PTGS2, SELL, SPP1, TNFAIP3	10			Cell Death	cell death	cell death of neutrophils	8.63e-07	BCL2A1, CSF3, IL6, IL8, IL1B, IL1RN, NAMPT	7
	Immune Response	proliferation	proliferation of T lymphocytes	0.000254	CAV1, CCL4, CD86, FYB, IL6, IL7R, INHBA, LCP2, LILRB1, PTGS2, SOCS3, WIPF1	12			Cellular Movement	infiltration	infiltration of macrophages	2.94e-08	CCL4, HGF, ICAM1, IL6, IL1B, PTGES, PTGS2, SELL, SPP1, TNFAIP3	10			Hematological Disease	cell death	cell death of neutrophils	8.63e-07	BCL2A1, CSF3, IL6, IL8, IL1B, IL1RN, NAMPT	7
	Cellular Movement	cell movement	cell movement of central nervous system cells	0.000255	CAV1, CCL2, IL6, ROBO1	4			Hematological System Development and Function	infiltration	infiltration of macrophages	2.94e-08	CCL4, HGF, ICAM1, IL6, IL1B, PTGES, PTGS2, SELL, SPP1, TNFAIP3	10			Immune Response	activation	activation of macrophages	8.65e-07	CCL4, CCL8, CSF3, IL6, IL8, IL1B, PTGS2, SLC11A1, TREM1	9
	Hematological Disease	hematological disorder	hematological disorder of blood vessel	0.000255	PLAU, SERPINE1, TFPI, THBD	4			Cell-To-Cell Signaling and Interaction	binding	binding of endothelial cells	2.94e-08	CCR1, CXCL11, ICAM1, IL6, IL8, IL1B, ITGAM, SELE, SELL, SERPINE1	10			Hematological System Development and Function	activation	activation of macrophages	8.65e-07	CCL4, CCL8, CSF3, IL6, IL8, IL1B, PTGS2, SLC11A1, TREM1	9
	Hematological Disease	Budd-Chiari syndrome	Budd-Chiari syndrome	0.000255	IL6, PLAT, PLAU, THBD	4			Cellular Function and Maintenance	engulfment	engulfment of blood cells	2.94e-08	CD93, CSF2RB, FCGR1A, FCGR2A, FCGR3B, FGR, HCK, IL1A, ITGAM, TREM1	10			Cell-To-Cell Signaling and Interaction	activation	activation of macrophages	8.65e-07	CCL4, CCL8, CSF3, IL6, IL8, IL1B, PTGS2, SLC11A1, TREM1	9
	Cardiovascular Disease	Budd-Chiari syndrome	Budd-Chiari syndrome	0.000255	IL6, PLAT, PLAU, THBD	4			Cardiovascular System Development and Function	binding	binding of endothelial cells	2.94e-08	CCR1, CXCL11, ICAM1, IL6, IL8, IL1B, ITGAM, SELE, SELL, SERPINE1	10			Immune and Lymphatic System Development and Function	activation	activation of macrophages	8.65e-07	CCL4, CCL8, CSF3, IL6, IL8, IL1B, PTGS2, SLC11A1, TREM1	9
	Cellular Growth and Proliferation	growth	growth of breast cancer cell lines	0.000268	CAV1, CXCR7, HGF, IGFBP5, IL6, INHBA, PLAU, SERPINE1	8			Immune Response	accumulation	accumulation of myeloid cells	2.99e-08	CR1, CSF3, EGR1, IL8, IL11, IL1B, PTX3, S100A8, S100A9, SELP, TLR4	11			Immune Response	accumulation	accumulation of granulocytes	8.68e-07	CSF3, CXCL10, IL8, IL11, IL1B, PTX3, S100A8, S100A9	8
	Skeletal and Muscular Disorders	disease process	disease process of muscle	0.000268	CCL2, FST, IL6, PLAT, PLAU, SERPINE1	6			Hematological System Development and Function	accumulation	accumulation of myeloid cells	2.99e-08	CR1, CSF3, EGR1, IL8, IL11, IL1B, PTX3, S100A8, S100A9, SELP, TLR4	11			Hematological System Development and Function	accumulation	accumulation of granulocytes	8.68e-07	CSF3, CXCL10, IL8, IL11, IL1B, PTX3, S100A8, S100A9	8
	Cancer	growth	growth of breast cancer cell lines	0.000268	CAV1, CXCR7, HGF, IGFBP5, IL6, INHBA, PLAU, SERPINE1	8			Immune and Lymphatic System Development and Function	accumulation	accumulation of myeloid cells	2.99e-08	CR1, CSF3, EGR1, IL8, IL11, IL1B, PTX3, S100A8, S100A9, SELP, TLR4	11			Cell-To-Cell Signaling and Interaction	induction	induction of eukaryotic cells	8.68e-07	CSF3, FGF2, HGF, IL6, IL8, IL1B, INHBA, OSM	8
	Reproductive System Disease	growth	growth of breast cancer cell lines	0.000268	CAV1, CXCR7, HGF, IGFBP5, IL6, INHBA, PLAU, SERPINE1	8			Tissue Development	accumulation	accumulation of myeloid cells	2.99e-08	CR1, CSF3, EGR1, IL8, IL11, IL1B, PTX3, S100A8, S100A9, SELP, TLR4	11			Tissue Development	accumulation	accumulation of granulocytes	8.68e-07	CSF3, CXCL10, IL8, IL11, IL1B, PTX3, S100A8, S100A9	8
	Connective Tissue Disorders	connective tissue disorder	connective tissue disorder of mice	0.000276	CCL2, CD69, FCER1G, FCGR2A, IL6, PLAU, SOCS3	7			Immunological Disease	apoptosis	apoptosis of leukocytes	3.04e-08	ANPEP, BCL2A1, CASP4, CCL4, CSF3, EGR1, FCER1G, GADD45B, ICAM1, IL6, IL8, IL1B, IL1RN, IL7R, ITGAM, NAMPT, PTPRC, THBS2, TNFRSF1B, TNFSF13B	20			Immune and Lymphatic System Development and Function	accumulation	accumulation of granulocytes	8.68e-07	CSF3, CXCL10, IL8, IL11, IL1B, PTX3, S100A8, S100A9	8
	Gene Expression	binding	binding of interferon-gamma activated sequence	0.000303	IL6, NR3C1, PLAU, SOCS3	4			Hematological Disease	apoptosis	apoptosis of leukocytes	3.04e-08	ANPEP, BCL2A1, CASP4, CCL4, CSF3, EGR1, FCER1G, GADD45B, ICAM1, IL6, IL8, IL1B, IL1RN, IL7R, ITGAM, NAMPT, PTPRC, THBS2, TNFRSF1B, TNFSF13B	20			Skeletal and Muscular Disorders	skeletal and muscular disorder	skeletal and muscular disorder of rodents	8.84e-07	C5AR1, CD69, CSF3, FCGR2A, IL6, IL1A, IL1B, IL1RN, MMP3, MMP10, SOCS3, TNFRSF11B	12
	Cellular Movement	mobilization	mobilization of eukaryotic cells	0.000304	CCL2, CCL4, IL11, SELE, SOCS3	5			Cell Death	apoptosis	apoptosis of leukocytes	3.04e-08	ANPEP, BCL2A1, CASP4, CCL4, CSF3, EGR1, FCER1G, GADD45B, ICAM1, IL6, IL8, IL1B, IL1RN, IL7R, ITGAM, NAMPT, PTPRC, THBS2, TNFRSF1B, TNFSF13B	20			Tissue Development	aggregation	aggregation of cells	9.25e-07	CXCL10, FCGR2A, FGF2, FPR1, HGF, IL6, LCP2, MMP3, MMP1 (includes EG:4312), PTPRC, SELL, THBS2, WNT5A	13
	Connective Tissue Disorders	arthritis	arthritis of joint	0.000304	PLAT, PLAU, SOCS3	3			Cell Signaling	mobilization	mobilization of Ca2+	3.32e-08	CCL4, CCR1, CXCL11, FCGR2A, FCGR2C, FPR1, IL8, IL8RA, IL8RB, LILRA6, LILRB2, PYY, SELL, TREM1	14			Cellular Movement	migration	migration of mononuclear leukocytes	9.36e-07	CCL4, CCR1, CD69, CXCL10, CXCL11, HGF, IL8, PROK2, PSCDBP, SELE, SPP1	11
	Inflammatory Disease	arthritis	arthritis of joint	0.000304	PLAT, PLAU, SOCS3	3			Molecular Transport	mobilization	mobilization of Ca2+	3.32e-08	CCL4, CCR1, CXCL11, FCGR2A, FCGR2C, FPR1, IL8, IL8RA, IL8RB, LILRA6, LILRB2, PYY, SELL, TREM1	14			Cellular Movement	movement	movement of mononuclear leukocytes	9.36e-07	CCL4, CCR1, CD69, CXCL10, CXCL11, HGF, IL8, PROK2, PSCDBP, SELE, SPP1	11
	Skeletal and Muscular Disorders	arthritis	arthritis of joint	0.000304	PLAT, PLAU, SOCS3	3			Vitamin and Mineral Metabolism	mobilization	mobilization of Ca2+	3.32e-08	CCL4, CCR1, CXCL11, FCGR2A, FCGR2C, FPR1, IL8, IL8RA, IL8RB, LILRA6, LILRB2, PYY, SELL, TREM1	14			Hematological System Development and Function	stimulation	stimulation of hematopoietic progenitor cells	9.36e-07	CSF3, FGF2, HGF, IL6, IL11	5
	Tissue Morphology	quantity	quantity of macrophages	0.000304	ABCA1, CCL2, FLI1, IL11, MMP3, PLAT, PLAU	7			Immune Response	accumulation	accumulation of bone marrow cells	3.48e-08	CR1, CSF3, EGR1, IL8, IL11, IL1B, PTX3, S100A8, S100A9, SELP, TLR4	11			Cellular Growth and Proliferation	stimulation	stimulation of hematopoietic progenitor cells	9.36e-07	CSF3, FGF2, HGF, IL6, IL11	5
	Tissue Morphology	modification	modification of wound	0.000304	FST, PLAT, PLAU	3			Immune and Lymphatic System Development and Function	accumulation	accumulation of bone marrow cells	3.48e-08	CR1, CSF3, EGR1, IL8, IL11, IL1B, PTX3, S100A8, S100A9, SELP, TLR4	11			Cell-To-Cell Signaling and Interaction	stimulation	stimulation of hematopoietic progenitor cells	9.36e-07	CSF3, FGF2, HGF, IL6, IL11	5
	Immune and Lymphatic System Development and Function	quantity	quantity of macrophages	0.000304	ABCA1, CCL2, FLI1, IL11, MMP3, PLAT, PLAU	7			Molecular Transport	release	release of eicosanoid	3.51e-08	ALOX5AP, BCL6, CLEC7A, CSF3, FCER1G, FCGR2A, IL8, IL1A, IL1B, IL1RN, PTGES, PTGS2, TLR4	13			Immune Response	chemotaxis	chemotaxis of dendritic cells	9.97e-07	C5AR1, CCL4, CXCL14, FPR1, GNLY, IL1A, IL1B	7
	Immune and Lymphatic System Development and Function	degranulation	degranulation of blood cells	0.000304	CCL4, ENTPD1, FCER1G, FCGR2A, LCP2, WIPF1	6			Lipid Metabolism	release	release of eicosanoid	3.51e-08	ALOX5AP, BCL6, CLEC7A, CSF3, FCER1G, FCGR2A, IL8, IL1A, IL1B, IL1RN, PTGES, PTGS2, TLR4	13			Cellular Movement	chemotaxis	chemotaxis of dendritic cells	9.97e-07	C5AR1, CCL4, CXCL14, FPR1, GNLY, IL1A, IL1B	7
	Hematological System Development and Function	quantity	quantity of macrophages	0.000304	ABCA1, CCL2, FLI1, IL11, MMP3, PLAT, PLAU	7			Small Molecule Biochemistry	release	release of eicosanoid	3.51e-08	ALOX5AP, BCL6, CLEC7A, CSF3, FCER1G, FCGR2A, IL8, IL1A, IL1B, IL1RN, PTGES, PTGS2, TLR4	13			Hematological System Development and Function	growth	growth of hematopoietic progenitor cells	9.97e-07	CCL4, CSF3, CXCL10, IL6, IL8, IL1A, INHBA	7
	Organismal Injury and Abnormalities	modification	modification of wound	0.000304	FST, PLAT, PLAU	3			Immune Response	accumulation	accumulation of neutrophils	3.53e-08	CR1, CSF3, IL8, IL1B, PTX3, S100A8, S100A9, SELP, TLR4	9			Cellular Growth and Proliferation	growth	growth of hematopoietic progenitor cells	9.97e-07	CCL4, CSF3, CXCL10, IL6, IL8, IL1A, INHBA	7
	Cardiovascular System Development and Function	angiogenesis	angiogenesis of blood vessel	0.000304	CCL2, CXCL6, HGF, IL6, INHBA, PLAT, PTGS2, SERPINE1	8			Immune Response	immunological process	immunological process of bone marrow cells	3.53e-08	CCL4, CSF3, FCGR2A, FCGR3B, FST, IL8, IL11, ITGAM, TREM1	9			Cellular Development	growth	growth of hematopoietic progenitor cells	9.97e-07	CCL4, CSF3, CXCL10, IL6, IL8, IL1A, INHBA	7
	Cancer	developmental process	developmental process of breast cancer cell lines	0.000313	CAV1, CXCR7, HGF, IGFBP5, IL6, INHBA, PLAU, SERPINE1	8			Hematological System Development and Function	accumulation	accumulation of neutrophils	3.53e-08	CR1, CSF3, IL8, IL1B, PTX3, S100A8, S100A9, SELP, TLR4	9			Dermatological Diseases and Conditions	disease process	disease process of skin	1.09e-06	HGF, IL6, IL1A, LCP2, MMP1 (includes EG:4312), SELE, SELL, SPP1	8
	Reproductive System Disease	developmental process	developmental process of breast cancer cell lines	0.000313	CAV1, CXCR7, HGF, IGFBP5, IL6, INHBA, PLAU, SERPINE1	8			Immune and Lymphatic System Development and Function	accumulation	accumulation of neutrophils	3.53e-08	CR1, CSF3, IL8, IL1B, PTX3, S100A8, S100A9, SELP, TLR4	9			Hematological System Development and Function	binding	binding of granulocytes	1.17e-06	CXCL10, FCGR2A, FCGR3B, IL8, S100A9, SELE, SELL	7
	Cardiovascular System Development and Function	neovascularization	neovascularization	0.000325	HGF, INHBA, NR3C1, PLAU, PTGS1, PTGS2	6			Immune and Lymphatic System Development and Function	immunological process	immunological process of bone marrow cells	3.53e-08	CCL4, CSF3, FCGR2A, FCGR3B, FST, IL8, IL11, ITGAM, TREM1	9			Hematological System Development and Function	binding	binding of macrophages	1.17e-06	CCR1, FGF2, FPR1, IL8, IL1A, PTPRC, SELE	7
	Organismal Development	neovascularization	neovascularization	0.000325	HGF, INHBA, NR3C1, PLAU, PTGS1, PTGS2	6			Tissue Development	accumulation	accumulation of neutrophils	3.53e-08	CR1, CSF3, IL8, IL1B, PTX3, S100A8, S100A9, SELP, TLR4	9			Hematological System Development and Function	binding	binding of myeloid cells	1.17e-06	CXCL10, FCGR2A, FCGR3B, IL8, S100A9, SELE, SELL	7
	Cancer	head and neck cancer	head and neck cancer	0.000328	CAV1, CSF2RB, EDNRB, IGFBP5, IL6, IL13RA2, NR3C1, PLAT, PTGS1, PTGS2, TNC	11			Immune Response	chemotaxis	chemotaxis of mononuclear leukocytes	3.63e-08	CCL4, CCR1, CXCL11, FPR1, FPR2, GNLY, IL8, IL1B, INHBA, SELE, SOCS3, SPP1, THBS2, TLR4	14			Cell-To-Cell Signaling and Interaction	binding	binding of granulocytes	1.17e-06	CXCL10, FCGR2A, FCGR3B, IL8, S100A9, SELE, SELL	7
	Cellular Movement	mobilization	mobilization of cells	0.000332	CCL2, CCL4, IL11, SELE, SOCS3	5			Cellular Movement	chemotaxis	chemotaxis of mononuclear leukocytes	3.63e-08	CCL4, CCR1, CXCL11, FPR1, FPR2, GNLY, IL8, IL1B, INHBA, SELE, SOCS3, SPP1, THBS2, TLR4	14			Cell-To-Cell Signaling and Interaction	binding	binding of macrophages	1.17e-06	CCR1, FGF2, FPR1, IL8, IL1A, PTPRC, SELE	7
	Cellular Movement	influx	influx of lymphatic system cells	0.000351	CCL4, CXCL6, FCGR2A, IL6	4			Hematological System Development and Function	chemotaxis	chemotaxis of mononuclear leukocytes	3.63e-08	CCL4, CCR1, CXCL11, FPR1, FPR2, GNLY, IL8, IL1B, INHBA, SELE, SOCS3, SPP1, THBS2, TLR4	14			Cell-To-Cell Signaling and Interaction	binding	binding of myeloid cells	1.17e-06	CXCL10, FCGR2A, FCGR3B, IL8, S100A9, SELE, SELL	7
	Cell Death	cell death	cell death of epithelial cells	0.000352	HGF, IL11, MMP3, NR3C1, PLAT, PLAU, PTGS1, PTGS2	8			Organismal Injury and Abnormalities	fibrosis	fibrosis	3.86e-08	ANPEP, CXCL6, CXCL11, EGR1, HGF, IFIT3, IL6, IL11, IL13RA2, IL1RN, OSM, PDE4B, PTGS2, SERPINE1, SPP1, TLR4, TNFRSF1B	17			Immune and Lymphatic System Development and Function	binding	binding of granulocytes	1.17e-06	CXCL10, FCGR2A, FCGR3B, IL8, S100A9, SELE, SELL	7
	Gene Expression	transactivation	transactivation of synthetic promoter	0.000359	DDX58, HGF, IL6, INHBA, LOX, NR3C1, PSCDBP, PTGS2, SOCS3	9			Cell Death	necrosis	necrosis	3.99e-08	BCL2A1, CD14, CSF3, EGR1, IL11, IL1B, S100A8, S100A9, SOCS3, SOD2, SPP1, TLR2, TLR4, TNFRSF1B	14			Immune and Lymphatic System Development and Function	binding	binding of macrophages	1.17e-06	CCR1, FGF2, FPR1, IL8, IL1A, PTPRC, SELE	7
	Renal and Urological Disease	renal and urological disorder	renal and urological disorder	0.000361	ABCA1, BICC1, CCL2, CCL4, EDNRB, FLI1, NR3C1, PDE4B, PTGS1, PTGS2, SERPINE1	11			Organismal Injury and Abnormalities	necrosis	necrosis	3.99e-08	BCL2A1, CD14, CSF3, EGR1, IL11, IL1B, S100A8, S100A9, SOCS3, SOD2, SPP1, TLR2, TLR4, TNFRSF1B	14			Immune and Lymphatic System Development and Function	binding	binding of myeloid cells	1.17e-06	CXCL10, FCGR2A, FCGR3B, IL8, S100A9, SELE, SELL	7
	Cancer	tumorigenesis	tumorigenesis of malignant tumor	0.000366	CAV1, HGF, MMP3, PTGS2, SOCS3, VIM	6			Immune Response	fever	fever	4.08e-08	CCL4, CD14, IL6, IL1A, IL1B, IL1RN, PTGS2	7			Cellular Movement	emigration	emigration of eukaryotic cells	1.19e-06	CXCL6, FCGR2A, IL1B, PSCDBP, SELL, SPP1	6
	Molecular Transport	release	release of lipid	0.000366	ABCA1, CCL2, FCER1G, FCGR2A, PTGS1, PTGS2, VIM	7			Immunological Disease	apoptosis	apoptosis of bone marrow cells	4.42e-08	ANPEP, BCL2A1, CSF3, GADD45B, IL6, IL8, IL11, IL1B, IL1RN, ITGAM, NAMPT, SPP1	12			Cell Morphology	shape change	shape change of plasma membrane	1.19e-06	CCR1, FGF2, FST, HGF, INHBA, SPP1	6
	Lipid Metabolism	release	release of lipid	0.000366	ABCA1, CCL2, FCER1G, FCGR2A, PTGS1, PTGS2, VIM	7			Cell Death	apoptosis	apoptosis of bone marrow cells	4.42e-08	ANPEP, BCL2A1, CSF3, GADD45B, IL6, IL8, IL11, IL1B, IL1RN, ITGAM, NAMPT, SPP1	12			Immunological Disease	apoptosis	apoptosis of myeloid cells	1.22e-06	BCL2A1, CD69, CSF3, IL6, IL8, IL1B, IL1RN, NAMPT	8
	Small Molecule Biochemistry	release	release of lipid	0.000366	ABCA1, CCL2, FCER1G, FCGR2A, PTGS1, PTGS2, VIM	7			Viral Function	replication	replication of HIV-1	4.42e-08	CCL4, HCK, IL6, IL8, IL1B, PTPRC, S100A8, S100A9, S100A12	9			Dermatological Diseases and Conditions	dermatological disorder	dermatological disorder of mammalia	1.22e-06	EREG, FCGR2A, IL8, IL1A, IL1B, MMP1 (includes EG:4312), PTGS2, SELE, SELL	9
	Cellular Development	differentiation	differentiation of lymphatic system cells	0.000373	CD86, CSF2RB, FCER1G, FLI1, IL6, IL11, IL13RA2, IL7R, INHBA, LCP2, PTGS2, SOCS3	12			Organismal Survival	death	death of mammalia	4.61e-08	BCL2A1, C5AR1, CCR1, CDX2, CR1, CSF3, DUSP1, FCER1G, FGF2, HBB (includes EG:3043), HGF, IGFBP5, IL6, IL1B, IL1RN, IL8RB, ITGAM, LCP2, LY96, MME, NFE2, NR3C2, OSM, PTGES, PTGS2, SERPINE1, SOCS3, SOD2, TLR4, TNFAIP3, TNFRSF11B, TNFRSF1B, TNFSF13B, TREM1, TWIST2	35			Cell Death	apoptosis	apoptosis of myeloid cells	1.22e-06	BCL2A1, CD69, CSF3, IL6, IL8, IL1B, IL1RN, NAMPT	8
	Cellular Movement	cell movement	cell movement of mononuclear leukocytes	0.000381	CCL2, CCL4, CCL8, CD86, CXCR7, IL6, INHBA, SELE, SOCS3	9			Cellular Movement	extravasation	extravasation of lymphatic system cells	4.92e-08	CCR1, IL1B, IL8RA, SELE, SELL, SELP	6			Hematological Disease	apoptosis	apoptosis of myeloid cells	1.22e-06	BCL2A1, CD69, CSF3, IL6, IL8, IL1B, IL1RN, NAMPT	8
	Hematological System Development and Function	cell movement	cell movement of mononuclear leukocytes	0.000381	CCL2, CCL4, CCL8, CD86, CXCR7, IL6, INHBA, SELE, SOCS3	9			Cancer	developmental process	developmental process of tumor cells	5.44e-08	CSF3, CSF3R, DUSP1, EGR1, FGF2, FST, HGF, IGFBP5, IL6, IL24, IL13RA2, IL1B, INHBA, OSM, TNFSF13B	15			Hematological Disease	bleeding	bleeding	1.23e-06	F5, FCGR2A, INHBA, LCP2, NFE2, PTGS2, PTX3, SELE, SELL, SERPINE1	10
	Immune Response	cell movement	cell movement of mononuclear leukocytes	0.000381	CCL2, CCL4, CCL8, CD86, CXCR7, IL6, INHBA, SELE, SOCS3	9			Renal and Urological Disease	damage	damage of kidney	5.54e-08	CR1, DUSP1, FCGR1A, FCGR2A, FGR, HCK, SELP, TLR2, TLR4	9			Immune Response	activation	activation of T lymphocytes	1.27e-06	CCL4, CCL8, CLEC7A, IL6, IL8, IL1B, LILRB1, PTPRC, SLC11A1, SPP1, TLR8, TNC	12
	Cancer	differentiation	differentiation of leukemia cell lines	0.000383	CSF2RB, FLI1, IL6, IL11, INHBA, RUNX2, SOCS3	7			Hematological System Development and Function	development	development of blood cells	5.56e-08	BCL6, CSF3, CSF3R, CXCL11, EGR1, FCER1G, FCGR2A, ICAM1, IL6, IL1A, IL1B, IL1RN, IL7R, LCP2, OSM, PTPRC, SOCS3, THBS2, TNFRSF11B, TNFSF13B	20			Immune Response	activation	activation of mononuclear leukocytes	1.27e-06	CCL4, CCL8, CLEC7A, FCGR2A, IL6, IL8, IL1B, LILRB1, PTPRC, SLC11A1, SPP1, TLR8, TNC, TREM1	14
	Hematological Disease	differentiation	differentiation of leukemia cell lines	0.000383	CSF2RB, FLI1, IL6, IL11, INHBA, RUNX2, SOCS3	7			Cellular Development	development	development of blood cells	5.56e-08	BCL6, CSF3, CSF3R, CXCL11, EGR1, FCER1G, FCGR2A, ICAM1, IL6, IL1A, IL1B, IL1RN, IL7R, LCP2, OSM, PTPRC, SOCS3, THBS2, TNFRSF11B, TNFSF13B	20			Hematological System Development and Function	activation	activation of T lymphocytes	1.27e-06	CCL4, CCL8, CLEC7A, IL6, IL8, IL1B, LILRB1, PTPRC, SLC11A1, SPP1, TLR8, TNC	12
	Cancer	disease process	disease process of malignant tumor	0.000388	CAV1, HGF, MMP3, PTGS2, SOCS3, VIM	6			Dermatological Diseases and Conditions	dermatological disorder	dermatological disorder of mammalia	5.63e-08	EREG, FCGR1A, FCGR2A, IL8, IL1A, IL1B, MMP1 (includes EG:4312), PTGS2, SELE, SELL, SELP, TNFRSF1B	12			Hematological System Development and Function	activation	activation of mononuclear leukocytes	1.27e-06	CCL4, CCL8, CLEC7A, FCGR2A, IL6, IL8, IL1B, LILRB1, PTPRC, SLC11A1, SPP1, TLR8, TNC, TREM1	14
	Gene Expression	expression	expression of synthetic promoter	0.000388	CD86, EBI2, FLI1, FST, IL6, IL11, INHBA, LCP2, LY96, NR3C1, RUNX2, SOCS3	12			Hematological System Development and Function	development	development of leukocytes	5.79e-08	BCL6, CSF3, CSF3R, CXCL11, EGR1, FCER1G, FCGR2A, ICAM1, IL6, IL1A, IL1B, IL7R, LCP2, OSM, PTPRC, SOCS3, TNFRSF11B, TNFSF13B	18			Cell-To-Cell Signaling and Interaction	activation	activation of T lymphocytes	1.27e-06	CCL4, CCL8, CLEC7A, IL6, IL8, IL1B, LILRB1, PTPRC, SLC11A1, SPP1, TLR8, TNC	12
	Cellular Movement	infiltration	infiltration of granulocytes	0.0004	CCL4, FCER1G, IL6, PLAT, PTGS2, SELE, SOCS3	7			Cellular Development	development	development of leukocytes	5.79e-08	BCL6, CSF3, CSF3R, CXCL11, EGR1, FCER1G, FCGR2A, ICAM1, IL6, IL1A, IL1B, IL7R, LCP2, OSM, PTPRC, SOCS3, TNFRSF11B, TNFSF13B	18			Cell-To-Cell Signaling and Interaction	activation	activation of mononuclear leukocytes	1.27e-06	CCL4, CCL8, CLEC7A, FCGR2A, IL6, IL8, IL1B, LILRB1, PTPRC, SLC11A1, SPP1, TLR8, TNC, TREM1	14
	Hematological System Development and Function	infiltration	infiltration of granulocytes	0.0004	CCL4, FCER1G, IL6, PLAT, PTGS2, SELE, SOCS3	7			Cellular Movement	infiltration	infiltration of antigen presenting cells	5.94e-08	CCL4, HGF, ICAM1, IL6, IL1B, PTGES, PTGS2, SELL, SPP1, TNFAIP3	10			Immune and Lymphatic System Development and Function	activation	activation of T lymphocytes	1.27e-06	CCL4, CCL8, CLEC7A, IL6, IL8, IL1B, LILRB1, PTPRC, SLC11A1, SPP1, TLR8, TNC	12
	Immune Response	infiltration	infiltration of granulocytes	0.0004	CCL4, FCER1G, IL6, PLAT, PTGS2, SELE, SOCS3	7			Organismal Survival	death	death of animal	7.49e-08	BCL2A1, C5AR1, CCR1, CDX2, CR1, CSF3, DUSP1, FCER1G, FGF2, HBB (includes EG:3043), HGF, IGFBP5, IL6, IL1B, IL1RN, IL8RB, ITGAM, LCP2, LY96, MME, NFE2, NR3C2, OSM, PTGES, PTGS2, SERPINE1, SOCS3, SOD2, TLR4, TNFAIP3, TNFRSF11B, TNFRSF1B, TNFSF13B, TREM1, TWIST2	35			Immune and Lymphatic System Development and Function	activation	activation of mononuclear leukocytes	1.27e-06	CCL4, CCL8, CLEC7A, FCGR2A, IL6, IL8, IL1B, LILRB1, PTPRC, SLC11A1, SPP1, TLR8, TNC, TREM1	14
	Cellular Movement	localization	localization of eukaryotic cells	0.000401	FCGR2A, HGF, SOCS3, TNFRSF11B	4			Cellular Movement	chemotaxis	chemotaxis of cell lines	7.55e-08	CCL4, CCR1, CXCL5, CXCL11, CXCL14, FGF2, FPR1, FPR2, HGF, IL8, IL8RA, IL8RB, PTGS2, SELE, TLR2	15			Cellular Development	developmental process	developmental process of osteoclasts	1.33e-06	CXCL11, IL6, IL8, IL11, IL1A, INHBA, SOCS3, TLR2, TNFRSF11B	9
	Cellular Growth and Proliferation	production	production of leukocytes	0.000401	CSF2RB, IL6, IL11, SOCS3	4			Cellular Development	developmental process	developmental process of phagocytes	7.66e-08	CSF3, CSF2RB, CXCL11, EGR1, HGF, IL6, IL1RN, INHBA, ITGAM, SOCS3, TLR4, TLR8, TNFRSF11B, TREM1	14			Skeletal and Muscular System Development and Function	osteoclastogenesis	osteoclastogenesis of eukaryotic cells	1.34e-06	CXCL11, IL6, IL11, IL1B, IL1RN, OSM, TNFRSF11B	7
	Hematological System Development and Function	production	production of leukocytes	0.000401	CSF2RB, IL6, IL11, SOCS3	4			Cardiovascular Disease	atherosclerotic lesion	atherosclerotic lesion	8.21e-08	EGR1, ICAM1, IL33, IL1B, MMP3, PTGES, SELE, SELP, SERPINE1, SPP1, TNFAIP3	11			Small Molecule Biochemistry	production	production of prostaglandin E2	1.34e-06	FCGR2A, IL6, IL8, IL18RAP, IL1A, IL1B, IL1RN, PTGS2	8
	Cellular Function and Maintenance	localization	localization of eukaryotic cells	0.000401	FCGR2A, HGF, SOCS3, TNFRSF11B	4			Hematological System Development and Function	binding	binding of macrophages	8.49e-08	CCR1, FCGR1A, FGF2, FPR1, IL8, IL1A, ITGAM, PTPRC, SELE	9			Small Molecule Biochemistry	production	production of prostaglandins E	1.34e-06	FCGR2A, IL6, IL8, IL18RAP, IL1A, IL1B, IL1RN, PTGS2	8
	Reproductive System Development and Function	ovulation	ovulation of mammalia	0.000401	INHBA, PLAT, PLAU, PTGS2	4			Cell-To-Cell Signaling and Interaction	binding	binding of macrophages	8.49e-08	CCR1, FCGR1A, FGF2, FPR1, IL8, IL1A, ITGAM, PTPRC, SELE	9			Drug Metabolism	production	production of prostaglandin E2	1.34e-06	FCGR2A, IL6, IL8, IL18RAP, IL1A, IL1B, IL1RN, PTGS2	8
	Cellular Movement	migration	migration of breast cancer cell lines	0.000408	CAV1, HGF, IGFBP5, IL6, PLAU, SERPINE1	6			Immune and Lymphatic System Development and Function	binding	binding of macrophages	8.49e-08	CCR1, FCGR1A, FGF2, FPR1, IL8, IL1A, ITGAM, PTPRC, SELE	9			Lipid Metabolism	production	production of prostaglandin E2	1.34e-06	FCGR2A, IL6, IL8, IL18RAP, IL1A, IL1B, IL1RN, PTGS2	8
	Cancer	migration	migration of breast cancer cell lines	0.000408	CAV1, HGF, IGFBP5, IL6, PLAU, SERPINE1	6			Gene Expression	activation	activation of synthetic promoter	8.61e-08	APBB1IP, CSF3, CSF2RB, CSF3R, CXCL6, DUSP1, EGR1, FCGR2A, FGF2, FPR2, GPR65, HGF, HOXB13, IL6, IL24, IL13RA2, IL1A, IL1B, INHBA, LCP2, PTGS2, SERPINE1, SOCS3, TLR2, TLR4, TNFRSF1B, TNFSF13B	27			Lipid Metabolism	production	production of prostaglandins E	1.34e-06	FCGR2A, IL6, IL8, IL18RAP, IL1A, IL1B, IL1RN, PTGS2	8
	Reproductive System Disease	migration	migration of breast cancer cell lines	0.000408	CAV1, HGF, IGFBP5, IL6, PLAU, SERPINE1	6			Cell-To-Cell Signaling and Interaction	attachment	attachment of blood cells	9.24e-08	CSF2RB, ICAM1, IL1B, ITGAM, ITGAX, SELE, SELL	7			Connective Tissue Disorders	destruction	destruction of bone	1.35e-06	FGF2, IL6, IL1B, OSM, TNFRSF11B	5
	Organismal Functions	healing	healing	0.000408	IL6, LOX, PLAU, PTGS1, PTGS2, SERPINE1	6			Hematological System Development and Function	adhesion	adhesion of T lymphocytes	9.35e-08	CCL4, CXCL11, FYB, HGF, ICAM1, SELE, SELL, SELP, SPP1, THBS2, TLR4	11			Skeletal and Muscular Disorders	destruction	destruction of bone	1.35e-06	FGF2, IL6, IL1B, OSM, TNFRSF11B	5
	Connective Tissue Disorders	connective tissue disorder	connective tissue disorder of joint	0.000425	PLAT, PLAU, SOCS3	3			Cell-To-Cell Signaling and Interaction	adhesion	adhesion of T lymphocytes	9.35e-08	CCL4, CXCL11, FYB, HGF, ICAM1, SELE, SELL, SELP, SPP1, THBS2, TLR4	11			Immune Response	inflammation	inflammation of eukaryotic cells	1.35e-06	IL11, S100A8, S100A9, S100A12, TLR2	5
	Skeletal and Muscular Disorders	connective tissue disorder	connective tissue disorder of joint	0.000425	PLAT, PLAU, SOCS3	3			Immune and Lymphatic System Development and Function	adhesion	adhesion of T lymphocytes	9.35e-08	CCL4, CXCL11, FYB, HGF, ICAM1, SELE, SELL, SELP, SPP1, THBS2, TLR4	11			Immune Response	mobilization	mobilization of granulocytes	1.35e-06	CCL4, CSF3, FPR1, IL8, IL1B	5
	Hematological System Development and Function	development	development of mononuclear leukocytes	0.000425	CD69, FCER1G, FCGR2A, IL6, IL7R, LCP2, RUNX2, SOCS3, TNFRSF11B	9			Tissue Development	adhesion	adhesion of T lymphocytes	9.35e-08	CCL4, CXCL11, FYB, HGF, ICAM1, SELE, SELL, SELP, SPP1, THBS2, TLR4	11			Immune Response	priming	priming of neutrophils	1.35e-06	CSF3, IL8, IL1A, IL1B	4
	Cellular Development	development	development of mononuclear leukocytes	0.000425	CD69, FCER1G, FCGR2A, IL6, IL7R, LCP2, RUNX2, SOCS3, TNFRSF11B	9			Tissue Development	resorption	resorption of bone	9.35e-08	EGR1, FCER1G, IL6, IL11, IL1A, IL1B, OSM, PTGS2, SPP1, TNFRSF11B, TNFRSF1B	11			Cellular Movement	mobilization	mobilization of granulocytes	1.35e-06	CCL4, CSF3, FPR1, IL8, IL1B	5
	Molecular Transport	secretion	secretion of beta-estradiol	0.000425	FST, IL6, INHBA	3			Connective Tissue Development and Function	resorption	resorption of bone	9.35e-08	EGR1, FCER1G, IL6, IL11, IL1A, IL1B, OSM, PTGS2, SPP1, TNFRSF11B, TNFRSF1B	11			Cellular Movement	release	release of cells	1.35e-06	CSF3, CSF3R, IL1B, INHBA, SELL	5
	Lipid Metabolism	secretion	secretion of beta-estradiol	0.000425	FST, IL6, INHBA	3			Skeletal and Muscular System Development and Function	resorption	resorption of bone	9.35e-08	EGR1, FCER1G, IL6, IL11, IL1A, IL1B, OSM, PTGS2, SPP1, TNFRSF11B, TNFRSF1B	11			Hematological System Development and Function	mobilization	mobilization of granulocytes	1.35e-06	CCL4, CSF3, FPR1, IL8, IL1B	5
	Small Molecule Biochemistry	secretion	secretion of beta-estradiol	0.000425	FST, IL6, INHBA	3			Skeletal and Muscular Disorders	disease process	disease process of joint	1.05e-07	GAS1, IL1A, IL1B, OSM, SOCS3, TLR2, TNFAIP6, TNFRSF1B	8			Hematological System Development and Function	priming	priming of neutrophils	1.35e-06	CSF3, IL8, IL1A, IL1B	4
	Drug Metabolism	secretion	secretion of beta-estradiol	0.000425	FST, IL6, INHBA	3			Tissue Development	formation	formation of tissue	1.07e-07	CHRDL2, FGF2, FST, HGF, HOXD11, ICAM1, IGFBP5, IL6, IL8, IL11, IL1RN, PTGES, PTGS2, RGS2, SELE, SELL, SERPINE1, SPP1, STC1	19			Hematological System Development and Function	stimulation	stimulation of hematopoietic cells	1.35e-06	CSF3, FGF2, HGF, IL6, IL11	5
	Endocrine System Development and Function	secretion	secretion of beta-estradiol	0.000425	FST, IL6, INHBA	3			Immune Response	homing	homing of mononuclear leukocytes	1.09e-07	CCL4, CCR1, CXCL11, FPR1, FPR2, GNLY, IL8, IL1B, INHBA, SELE, SOCS3, SPP1, THBS2, TLR4	14			Cellular Growth and Proliferation	growth	growth of pituitary cells	1.35e-06	IL6, IL1A, IL1B, IL1RN	4
	Cellular Movement	movement	movement of breast cancer cell lines	0.000431	CAV1, HGF, IGFBP5, IL6, PLAU, SERPINE1	6			Cellular Movement	homing	homing of mononuclear leukocytes	1.09e-07	CCL4, CCR1, CXCL11, FPR1, FPR2, GNLY, IL8, IL1B, INHBA, SELE, SOCS3, SPP1, THBS2, TLR4	14			Cellular Growth and Proliferation	stimulation	stimulation of hematopoietic cells	1.35e-06	CSF3, FGF2, HGF, IL6, IL11	5
	Cellular Movement	cell movement	cell movement of monocytes	0.000431	CCL2, CCL4, CCL8, IL6, INHBA, SELE	6			Hematological System Development and Function	homing	homing of mononuclear leukocytes	1.09e-07	CCL4, CCR1, CXCL11, FPR1, FPR2, GNLY, IL8, IL1B, INHBA, SELE, SOCS3, SPP1, THBS2, TLR4	14			Cell-To-Cell Signaling and Interaction	stimulation	stimulation of hematopoietic cells	1.35e-06	CSF3, FGF2, HGF, IL6, IL11	5
	Cancer	movement	movement of breast cancer cell lines	0.000431	CAV1, HGF, IGFBP5, IL6, PLAU, SERPINE1	6			Cellular Movement	extravasation	extravasation of cells	1.35e-07	CCR1, IL1B, IL8RA, ITGAM, SELE, SELL, SELP	7			Cell-To-Cell Signaling and Interaction	priming	priming of neutrophils	1.35e-06	CSF3, IL8, IL1A, IL1B	4
	Hematological System Development and Function	cell movement	cell movement of monocytes	0.000431	CCL2, CCL4, CCL8, IL6, INHBA, SELE	6			Inflammatory Disease	inflammatory disorder	inflammatory disorder of organ	1.37e-07	CD14, HCK, ICAM1, IL8RB, LCP2, MMP3, PTGS2, TLR2, TLR4, TNFSF13B	10			Tissue Morphology	destruction	destruction of bone	1.35e-06	FGF2, IL6, IL1B, OSM, TNFRSF11B	5
	Reproductive System Disease	movement	movement of breast cancer cell lines	0.000431	CAV1, HGF, IGFBP5, IL6, PLAU, SERPINE1	6			Hematological System Development and Function	development	development of mononuclear leukocytes	1.58e-07	BCL6, CSF3R, CXCL11, EGR1, FCER1G, FCGR2A, ICAM1, IL6, IL1A, IL1B, IL7R, LCP2, OSM, PTPRC, SOCS3, TNFRSF11B, TNFSF13B	17			Immune and Lymphatic System Development and Function	priming	priming of neutrophils	1.35e-06	CSF3, IL8, IL1A, IL1B	4
	Immune Response	cell movement	cell movement of monocytes	0.000431	CCL2, CCL4, CCL8, IL6, INHBA, SELE	6			Cellular Development	development	development of mononuclear leukocytes	1.58e-07	BCL6, CSF3R, CXCL11, EGR1, FCER1G, FCGR2A, ICAM1, IL6, IL1A, IL1B, IL7R, LCP2, OSM, PTPRC, SOCS3, TNFRSF11B, TNFSF13B	17			Cellular Development	growth	growth of pituitary cells	1.35e-06	IL6, IL1A, IL1B, IL1RN	4
	Cardiovascular System Development and Function	angiogenesis	angiogenesis	0.000446	CCL2, CXCL6, HGF, IL6, INHBA, PDPN, PLAT, PLAU, PTGS2, SERPINE1	10			Molecular Transport	release	release of lipid	1.63e-07	ALOX5AP, BCL6, CLEC7A, CSF3, FCER1G, FCGR2A, IL8, IL1A, IL1B, IL1RN, PTGES, PTGS2, TLR4	13			Endocrine System Development and Function	growth	growth of pituitary cells	1.35e-06	IL6, IL1A, IL1B, IL1RN	4
	Hematological System Development and Function	aggregation	aggregation of blood cells	0.000453	ENTPD1, FCER1G, FCGR2A, IL6, LCP2, PDPN, PLAT	7			Lipid Metabolism	release	release of lipid	1.63e-07	ALOX5AP, BCL6, CLEC7A, CSF3, FCER1G, FCGR2A, IL8, IL1A, IL1B, IL1RN, PTGES, PTGS2, TLR4	13			Nervous System Development and Function	growth	growth of pituitary cells	1.35e-06	IL6, IL1A, IL1B, IL1RN	4
	Tissue Development	aggregation	aggregation of blood cells	0.000453	ENTPD1, FCER1G, FCGR2A, IL6, LCP2, PDPN, PLAT	7			Small Molecule Biochemistry	release	release of lipid	1.63e-07	ALOX5AP, BCL6, CLEC7A, CSF3, FCER1G, FCGR2A, IL8, IL1A, IL1B, IL1RN, PTGES, PTGS2, TLR4	13			Cell-To-Cell Signaling and Interaction	attachment	attachment of cells	1.39e-06	EMR2, IL1B, SELE, SELL, SERPINE1, SPP1, TFPI2, THBS2, VCAN	9
	Cellular Movement	influx	influx of leukocytes	0.000459	CCL4, CXCL6, FCGR2A, IL6	4			Cellular Movement	homing	homing of cell lines	1.66e-07	CCL4, CCR1, CXCL5, CXCL11, CXCL14, FGF2, FPR1, FPR2, HGF, IL8, IL8RA, IL8RB, PTGS2, SELE, TLR2	15			Tissue Development	formation	formation of tissue	1.39e-06	DKK1, FGF2, FST, HGF, IL6, IL8, IL11, IL1RN, PTGS2, SELE, SELL, SERPINE1, SPP1, STC1	14
	Hematological System Development and Function	influx	influx of leukocytes	0.000459	CCL4, CXCL6, FCGR2A, IL6	4			Immunological Disease	immunological disorder	immunological disorder of mice	1.67e-07	CASP4, CCL4, CCR1, CD14, CSF3, FCER1G, FCGR1A, FCGR2A, HLA-DQA1, IL6, IL8, IL1RN, IL7R, LCP2, SELL, SOCS3, SPP1, TLR4, TNFRSF11B	19			Tissue Development	formation	formation of connective tissue	1.39e-06	FGF2, FST, IL6, IL11, IL1RN, PTGS2, SELL, SPP1, STC1	9
	Immune Response	influx	influx of leukocytes	0.000459	CCL4, CXCL6, FCGR2A, IL6	4			Tissue Morphology	remodeling	remodeling of bone	1.81e-07	EGR1, FCER1G, IL6, IL11, IL1A, IL1B, OSM, PTGS2, SPP1, TNFRSF11B, TNFRSF1B	11			Cancer	developmental process	developmental process of tumor cells	1.39e-06	CSF3, CSF3R, FGF2, FST, HGF, IL6, IL24, IL13RA2, IL1B, INHBA, OSM	11
	Skeletal and Muscular Disorders	osteoporosis	osteoporosis	0.00046	FCER1G, IL6, PTGS1, PTGS2, TNFRSF11B	5			Tissue Morphology	remodeling	remodeling of connective tissue	1.81e-07	EGR1, FCER1G, IL6, IL11, IL1A, IL1B, OSM, PTGS2, SPP1, TNFRSF11B, TNFRSF1B	11			Cellular Development	maturation	maturation of cells	1.39e-06	CLEC7A, CSF3, EREG, FGF2, IL6, IL11, IL33, IL1A, IL1B, NFE2, PTGS2, PTPRC, TLR2, TLR8	14
	Tissue Development	formation	formation of epithelial tissue	0.00046	CCL2, PLAU, SDC2, SELE, SERPINE1	5			Tissue Development	remodeling	remodeling of bone	1.81e-07	EGR1, FCER1G, IL6, IL11, IL1A, IL1B, OSM, PTGS2, SPP1, TNFRSF11B, TNFRSF1B	11			Hematological Disease	hemorrhage	hemorrhage	1.39e-06	F5, FCGR2A, INHBA, LCP2, NFE2, PTGS2, PTX3, SELE, SELL	9
	Cellular Movement	infiltration	infiltration of myeloid cells	0.000472	CCL4, FCER1G, IL6, PLAT, PTGS2, SELE, SOCS3	7			Tissue Development	remodeling	remodeling of connective tissue	1.81e-07	EGR1, FCER1G, IL6, IL11, IL1A, IL1B, OSM, PTGS2, SPP1, TNFRSF11B, TNFRSF1B	11			Cellular Movement	emigration	emigration of cells	1.42e-06	CXCL6, FCGR2A, IL1B, PSCDBP, SELL, SPP1	6
	Hematological System Development and Function	infiltration	infiltration of myeloid cells	0.000472	CCL4, FCER1G, IL6, PLAT, PTGS2, SELE, SOCS3	7			Connective Tissue Development and Function	remodeling	remodeling of bone	1.81e-07	EGR1, FCER1G, IL6, IL11, IL1A, IL1B, OSM, PTGS2, SPP1, TNFRSF11B, TNFRSF1B	11			Cell Death	apoptosis	apoptosis of endothelial cell lines	1.45e-06	BCL2A1, FGF2, HGF, IL8, IL1B, S100A8, S100A9, SPP1	8
	Immune Response	infiltration	infiltration of myeloid cells	0.000472	CCL4, FCER1G, IL6, PLAT, PTGS2, SELE, SOCS3	7			Skeletal and Muscular System Development and Function	remodeling	remodeling of bone	1.81e-07	EGR1, FCER1G, IL6, IL11, IL1A, IL1B, OSM, PTGS2, SPP1, TNFRSF11B, TNFRSF1B	11			Cardiovascular Disease	apoptosis	apoptosis of endothelial cell lines	1.45e-06	BCL2A1, FGF2, HGF, IL8, IL1B, S100A8, S100A9, SPP1	8
	Cellular Movement	cell movement	cell movement of lymphocytes	0.000478	CCL2, CCL4, CCL8, CD86, CXCR7, IL6, SELE, SOCS3	8			Embryonic Development	remodeling	remodeling of bone	1.81e-07	EGR1, FCER1G, IL6, IL11, IL1A, IL1B, OSM, PTGS2, SPP1, TNFRSF11B, TNFRSF1B	11			Cellular Development	developmental process	developmental process of lymphocytes	1.48e-06	BCL6, C5AR1, CD69, CSF3R, DKK1, FCGR2A, IL6, IL13RA2, IL1A, IL1B, IL7R, INHBA, LCP2, OSM, PTGS2, PTPRC, SOCS3	17
	Hematological System Development and Function	cell movement	cell movement of lymphocytes	0.000478	CCL2, CCL4, CCL8, CD86, CXCR7, IL6, SELE, SOCS3	8			Embryonic Development	remodeling	remodeling of connective tissue	1.81e-07	EGR1, FCER1G, IL6, IL11, IL1A, IL1B, OSM, PTGS2, SPP1, TNFRSF11B, TNFRSF1B	11			Tissue Development	developmental process	developmental process of bone	1.49e-06	FGF2, GAS1, IL6, IL11, IL1A, IL1B, IL1RN, OSM, PTGS2, SPP1, STC1, TNFRSF11B	12
	Immune Response	cell movement	cell movement of lymphocytes	0.000478	CCL2, CCL4, CCL8, CD86, CXCR7, IL6, SELE, SOCS3	8			Cell-To-Cell Signaling and Interaction	binding	binding of antigen presenting cells	1.87e-07	CCR1, FCGR1A, FGF2, FPR1, IL8, IL1A, ITGAM, PTPRC, SELE	9			Cellular Development	osteoclastogenesis	osteoclastogenesis of cells	1.49e-06	CXCL11, IL6, IL11, IL1B, IL1RN, OSM, TNFRSF11B	7
	Immune and Lymphatic System Development and Function	activation	activation of macrophages	0.000482	CCL2, CCL4, CCL8, IL6, LY96, PTGS2	6			Immune and Lymphatic System Development and Function	binding	binding of antigen presenting cells	1.87e-07	CCR1, FCGR1A, FGF2, FPR1, IL8, IL1A, ITGAM, PTPRC, SELE	9			Skeletal and Muscular System Development and Function	osteoclastogenesis	osteoclastogenesis of cells	1.49e-06	CXCL11, IL6, IL11, IL1B, IL1RN, OSM, TNFRSF11B	7
	Hematological System Development and Function	activation	activation of macrophages	0.000482	CCL2, CCL4, CCL8, IL6, LY96, PTGS2	6			Immune Response	activation	activation of lymphocytes	1.94e-07	CCL4, CLEC7A, DOK3, FCGR2A, ICAM1, IL6, IL8, IL1B, LILRA6, LILRB1, PTPRC, SLC11A1, SPP1, TLR4, TLR8, TNC, TNFRSF1B, TNFSF13B	18			Cancer	prostate cancer	prostate cancer	1.54e-06	COL7A1, IFI44L, IL6, IL7R, INDO, MMP1 (includes EG:4312), PI15, PSCDBP, PTGS2, PTPRC, S100A8, S100A9, SOCS3, SPP1, VCAN	15
	Cell-To-Cell Signaling and Interaction	activation	activation of macrophages	0.000482	CCL2, CCL4, CCL8, IL6, LY96, PTGS2	6			Hematological System Development and Function	activation	activation of lymphocytes	1.94e-07	CCL4, CLEC7A, DOK3, FCGR2A, ICAM1, IL6, IL8, IL1B, LILRA6, LILRB1, PTPRC, SLC11A1, SPP1, TLR4, TLR8, TNC, TNFRSF1B, TNFSF13B	18			Reproductive System Disease	prostate cancer	prostate cancer	1.54e-06	COL7A1, IFI44L, IL6, IL7R, INDO, MMP1 (includes EG:4312), PI15, PSCDBP, PTGS2, PTPRC, S100A8, S100A9, SOCS3, SPP1, VCAN	15
	Immune Response	activation	activation of macrophages	0.000482	CCL2, CCL4, CCL8, IL6, LY96, PTGS2	6			Cell-To-Cell Signaling and Interaction	activation	activation of lymphocytes	1.94e-07	CCL4, CLEC7A, DOK3, FCGR2A, ICAM1, IL6, IL8, IL1B, LILRA6, LILRB1, PTPRC, SLC11A1, SPP1, TLR4, TLR8, TNC, TNFRSF1B, TNFSF13B	18			Cellular Development	developmental process	developmental process of macrophages	1.55e-06	CSF3, CXCL11, HGF, IL6, IL1RN, INHBA, SOCS3, TLR8, TNFRSF11B, TREM1	10
	Cellular Movement	chemotaxis	chemotaxis of mononuclear leukocytes	0.00049	CCL2, CCL4, CCL8, CXCR7, INHBA, SELE, SOCS3	7			Immune and Lymphatic System Development and Function	activation	activation of lymphocytes	1.94e-07	CCL4, CLEC7A, DOK3, FCGR2A, ICAM1, IL6, IL8, IL1B, LILRA6, LILRB1, PTPRC, SLC11A1, SPP1, TLR4, TLR8, TNC, TNFRSF1B, TNFSF13B	18			Viral Function	replication	replication of virus	1.55e-06	CCL4, CCR1, CXCL10, IL6, IL8, IL1B, PTPRC, S100A8, S100A9, S100A12	10
	Cancer	head and neck tumor	head and neck tumor	0.00049	CAV1, EDNRB, IGFBP5, IL6, IL13RA2, NR3C1, PLAT, PTGS1, PTGS2, TNC	10			Cellular Development	developmental process	developmental process of lymphocytes	2.09e-07	BCL6, C5AR1, CD14, CSF3R, EGR1, FCER1G, FCGR2A, HLA-DQA1, ICAM1, IL6, IL13RA2, IL1A, IL1B, IL7R, INHBA, LCP2, OSM, PTGS2, PTPRC, RHOH, SOCS3, TLR4, TNFSF13B	23			Immune Response	accumulation	accumulation of myeloid cells	1.6e-06	CSF3, CXCL10, IL8, IL11, IL1B, PTX3, S100A8, S100A9	8
	Hematological System Development and Function	chemotaxis	chemotaxis of mononuclear leukocytes	0.00049	CCL2, CCL4, CCL8, CXCR7, INHBA, SELE, SOCS3	7			Immune and Lymphatic System Development and Function	quantity	quantity of antigen presenting cells	2.16e-07	CSF3, ICAM1, IL6, IL8, IL11, IL1A, IL1B, MMP3, PROK2, PTGES, SELL, SELP, TLR4, TNFRSF11B	14			Hematological System Development and Function	accumulation	accumulation of myeloid cells	1.6e-06	CSF3, CXCL10, IL8, IL11, IL1B, PTX3, S100A8, S100A9	8
	Immune Response	chemotaxis	chemotaxis of mononuclear leukocytes	0.00049	CCL2, CCL4, CCL8, CXCR7, INHBA, SELE, SOCS3	7			Tissue Morphology	quantity	quantity of antigen presenting cells	2.16e-07	CSF3, ICAM1, IL6, IL8, IL11, IL1A, IL1B, MMP3, PROK2, PTGES, SELL, SELP, TLR4, TNFRSF11B	14			Tissue Development	accumulation	accumulation of myeloid cells	1.6e-06	CSF3, CXCL10, IL8, IL11, IL1B, PTX3, S100A8, S100A9	8
	Cardiovascular System Development and Function	vascularization	vascularization	0.00049	HGF, INHBA, NR3C1, PLAU, PTGS1, PTGS2, STC1	7			Hematological System Development and Function	differentiation	differentiation of mononuclear leukocytes	2.3e-07	BCL6, CD14, CSF3, EGR1, HLA-DQA1, ICAM1, IL6, IL8, IL13RA2, IL7R, INHBA, LCP2, PTGS2, PTPRC, RHOH, SOCS3, TLR4, TNFSF13B, TREM1	19			Immune and Lymphatic System Development and Function	accumulation	accumulation of myeloid cells	1.6e-06	CSF3, CXCL10, IL8, IL11, IL1B, PTX3, S100A8, S100A9	8
	Organismal Development	vascularization	vascularization	0.00049	HGF, INHBA, NR3C1, PLAU, PTGS1, PTGS2, STC1	7			Immune and Lymphatic System Development and Function	differentiation	differentiation of mononuclear leukocytes	2.3e-07	BCL6, CD14, CSF3, EGR1, HLA-DQA1, ICAM1, IL6, IL8, IL13RA2, IL7R, INHBA, LCP2, PTGS2, PTPRC, RHOH, SOCS3, TLR4, TNFSF13B, TREM1	19			Cell Death	cell death	cell death of blood cells	1.6e-06	BCL2A1, CCL4, CD69, CSF3, IL6, IL8, IL1B, IL1RN, IL7R, INDO, NAMPT, PTPRC, SOD2, SPP1, THBS2, TLR2	16
	Cell-To-Cell Signaling and Interaction	activation	activation of connective tissue cells	0.000496	IL6, IL11, PLAU, STC1, TNFRSF11B	5			Cellular Development	differentiation	differentiation of mononuclear leukocytes	2.3e-07	BCL6, CD14, CSF3, EGR1, HLA-DQA1, ICAM1, IL6, IL8, IL13RA2, IL7R, INHBA, LCP2, PTGS2, PTPRC, RHOH, SOCS3, TLR4, TNFSF13B, TREM1	19			Cellular Movement	migration	migration of endothelial cells	1.61e-06	CYR61, FGF2, HGF, IL8, IL1B, IL8RB, PROK2, PTGS2, SERPINE1, SPP1, STC1	11
	Cellular Growth and Proliferation	growth	growth of blood cells	0.000511	CCL2, CCL4, CD86, HGF, IL6, IL7R, INHBA, LCP2	8			Cell-To-Cell Signaling and Interaction	recruitment	recruitment of phagocytes	2.31e-07	C5AR1, CCL4, CCR1, ICAM1, IL8, IL1B, IL8RB, SERPINE1, THBS2, TLR2, TLR4	11			Cellular Growth and Proliferation	growth	growth of cancer cells	1.63e-06	CSF3, CSF3R, FGF2, HGF, IL6, IL24, IL1B, INHBA, OSM	9
	Cellular Development	growth	growth of blood cells	0.000511	CCL2, CCL4, CD86, HGF, IL6, IL7R, INHBA, LCP2	8			Dermatological Diseases and Conditions	dermatological disorder	dermatological disorder of mice	2.31e-07	EREG, FCGR1A, FCGR2A, IL8, IL1A, IL1B, MMP1 (includes EG:4312), PTGS2, SELE, SELL, SELP	11			Cancer	growth	growth of cancer cells	1.63e-06	CSF3, CSF3R, FGF2, HGF, IL6, IL24, IL1B, INHBA, OSM	9
	Cellular Movement	localization	localization of cells	0.000518	FCGR2A, HGF, SOCS3, TNFRSF11B	4			Immune Response	cell movement	cell movement of lymphocytes	2.38e-07	CCL4, CCR1, CXCL11, GNLY, ICAM1, IL6, IL8, IL1B, SELE, SELL, SELP, SOCS3, SPP1, THBS2, TLR4	15			Cell Cycle	mitogenesis	mitogenesis of eukaryotic cells	1.65e-06	CXCL10, EREG, FGF2, HGF, IL6, IL11, IL1B, INHBA, OSM, SPP1	10
	Immune and Lymphatic System Development and Function	activation	activation of mast cells	0.000518	FCER1G, FCGR2A, FYB, LCP2	4			Cellular Movement	cell movement	cell movement of lymphocytes	2.38e-07	CCL4, CCR1, CXCL11, GNLY, ICAM1, IL6, IL8, IL1B, SELE, SELL, SELP, SOCS3, SPP1, THBS2, TLR4	15			Immune Response	immunological process	immunological process of granulocytes	1.71e-06	CCL4, CSF3, FCGR2A, FCGR3B, IL8, TREM1	6
	Hematological System Development and Function	activation	activation of mast cells	0.000518	FCER1G, FCGR2A, FYB, LCP2	4			Hematological System Development and Function	cell movement	cell movement of lymphocytes	2.38e-07	CCL4, CCR1, CXCL11, GNLY, ICAM1, IL6, IL8, IL1B, SELE, SELL, SELP, SOCS3, SPP1, THBS2, TLR4	15			Hematological System Development and Function	binding	binding of neutrophils	1.71e-06	CXCL10, FCGR2A, FCGR3B, IL8, S100A9, SELL	6
	Cell-To-Cell Signaling and Interaction	activation	activation of mast cells	0.000518	FCER1G, FCGR2A, FYB, LCP2	4			Tissue Development	patterning	patterning of bone	2.61e-07	EGR1, FCER1G, IL6, IL11, IL1A, IL1B, OSM, PTGS2, SPP1, TNFRSF11B, TNFRSF1B	11			Hematological System Development and Function	growth	growth of hematopoietic cells	1.71e-06	CCL4, CSF3, CXCL10, IL6, IL8, IL1A, INHBA	7
	Cell-To-Cell Signaling and Interaction	activation	activation of osteoclasts	0.000518	IL6, IL11, STC1, TNFRSF11B	4			Tissue Development	patterning	patterning of connective tissue	2.61e-07	EGR1, FCER1G, IL6, IL11, IL1A, IL1B, OSM, PTGS2, SPP1, TNFRSF11B, TNFRSF1B	11			Cellular Growth and Proliferation	growth	growth of hematopoietic cells	1.71e-06	CCL4, CSF3, CXCL10, IL6, IL8, IL1A, INHBA	7
	Immune Response	activation	activation of mast cells	0.000518	FCER1G, FCGR2A, FYB, LCP2	4			Embryonic Development	patterning	patterning of bone	2.61e-07	EGR1, FCER1G, IL6, IL11, IL1A, IL1B, OSM, PTGS2, SPP1, TNFRSF11B, TNFRSF1B	11			Cell-To-Cell Signaling and Interaction	binding	binding of neutrophils	1.71e-06	CXCL10, FCGR2A, FCGR3B, IL8, S100A9, SELL	6
	Cellular Development	osteoclastogenesis	osteoclastogenesis of osteoclasts	0.000518	CCL2, IL6, IL11, TNFRSF11B	4			Embryonic Development	patterning	patterning of connective tissue	2.61e-07	EGR1, FCER1G, IL6, IL11, IL1A, IL1B, OSM, PTGS2, SPP1, TNFRSF11B, TNFRSF1B	11			Cell-To-Cell Signaling and Interaction	attraction	attraction of leukocytes	1.71e-06	C5AR1, CCL4, CXCL10, CXCL14, IL8, IL1B	6
	Skeletal and Muscular System Development and Function	activation	activation of osteoclasts	0.000518	IL6, IL11, STC1, TNFRSF11B	4			Immune Response	phagocytosis	phagocytosis of blood cells	2.68e-07	CD93, CSF2RB, FCGR1A, FCGR2A, FCGR3B, FGR, HCK, ITGAM, TREM1	9			Immune and Lymphatic System Development and Function	binding	binding of neutrophils	1.71e-06	CXCL10, FCGR2A, FCGR3B, IL8, S100A9, SELL	6
	Skeletal and Muscular System Development and Function	osteoclastogenesis	osteoclastogenesis of osteoclasts	0.000518	CCL2, IL6, IL11, TNFRSF11B	4			Cell-To-Cell Signaling and Interaction	phagocytosis	phagocytosis of blood cells	2.68e-07	CD93, CSF2RB, FCGR1A, FCGR2A, FCGR3B, FGR, HCK, ITGAM, TREM1	9			Immune and Lymphatic System Development and Function	immunological process	immunological process of granulocytes	1.71e-06	CCL4, CSF3, FCGR2A, FCGR3B, IL8, TREM1	6
	Connective Tissue Development and Function	activation	activation of osteoclasts	0.000518	IL6, IL11, STC1, TNFRSF11B	4			Cellular Development	developmental process	developmental process of bone marrow cells	2.68e-07	CCR1, CSF3, CSF2RB, CSF3R, FCER1G, FGF2, FST, IL6, IL8, IL11, IL1B, INHBA, NFE2, THBS2, TREM1, ZFP36	16			Cellular Development	growth	growth of hematopoietic cells	1.71e-06	CCL4, CSF3, CXCL10, IL6, IL8, IL1A, INHBA	7
	Connective Tissue Development and Function	osteoclastogenesis	osteoclastogenesis of osteoclasts	0.000518	CCL2, IL6, IL11, TNFRSF11B	4			Cellular Function and Maintenance	phagocytosis	phagocytosis of blood cells	2.68e-07	CD93, CSF2RB, FCGR1A, FCGR2A, FCGR3B, FGR, HCK, ITGAM, TREM1	9			Immune Response	accumulation	accumulation of bone marrow cells	1.76e-06	CSF3, CXCL10, IL8, IL11, IL1B, PTX3, S100A8, S100A9	8
	Cellular Function and Maintenance	localization	localization of cells	0.000518	FCGR2A, HGF, SOCS3, TNFRSF11B	4			Cellular Movement	mobilization	mobilization of phagocytes	2.77e-07	CCL4, CSF3, CXCL14, FPR1, IL8, IL1B	6			Immune and Lymphatic System Development and Function	accumulation	accumulation of bone marrow cells	1.76e-06	CSF3, CXCL10, IL8, IL11, IL1B, PTX3, S100A8, S100A9	8
	Immune and Lymphatic System Development and Function	activation	activation of neutrophils	0.000534	CCL2, CCL4, CXCL6, IL6, SELE	5			Hematological System Development and Function	mobilization	mobilization of phagocytes	2.77e-07	CCL4, CSF3, CXCL14, FPR1, IL8, IL1B	6			Immunological Disease	immunological disorder	immunological disorder of mice	1.87e-06	CCL4, CCR1, CSF3, CXCL10, FCGR2A, IL6, IL8, IL1RN, IL7R, LCP2, SELL, SOCS3, SPP1, TNFRSF11B	14
	Hematological System Development and Function	activation	activation of neutrophils	0.000534	CCL2, CCL4, CXCL6, IL6, SELE	5			Immunological Disease	disease process	disease process of lymphatic system cells	2.94e-07	ANPEP, FCER1G, FGR, FPR1, HCK, ICAM1, IL6, ITGAM, ITGAX, LILRA6, TREM1	11			Cellular Development	developmental process	developmental process of stromal cells	1.87e-06	FGF2, HGF, HSD11B1, IL6, IL11	5
	Cell-To-Cell Signaling and Interaction	activation	activation of neuroglia	0.000534	HGF, IL6, PLAT, PTGS2, VIM	5			Immunological Disease	immunological disorder	immunological disorder of rodents	3.11e-07	CASP4, CCL4, CCR1, CD14, CSF3, FCER1G, FCGR1A, FCGR2A, HLA-DQA1, IL6, IL8, IL1RN, IL7R, LCP2, SELL, SOCS3, SPP1, TLR4, TNFRSF11B	19			Cardiovascular System Development and Function	angiogenesis	angiogenesis of blood vessel	1.9e-06	CXCL6, CYR61, FGF2, HGF, IL6, IL8, IL1RN, INHBA, PTGS2, SERPINE1, THBS2	11
	Cell-To-Cell Signaling and Interaction	activation	activation of neutrophils	0.000534	CCL2, CCL4, CXCL6, IL6, SELE	5			Cell-To-Cell Signaling and Interaction	binding	binding of leukemia cell lines	3.2e-07	CD14, FYB, IL6, IL8RA, IL8RB, ITGAM, RHOH, SELL, TNC	9			Immunological Disease	cell death	cell death of myeloid cells	1.94e-06	BCL2A1, CD69, CSF3, IL6, IL8, IL1B, IL1RN, NAMPT	8
	Immune Response	activation	activation of neutrophils	0.000534	CCL2, CCL4, CXCL6, IL6, SELE	5			Cancer	binding	binding of leukemia cell lines	3.2e-07	CD14, FYB, IL6, IL8RA, IL8RB, ITGAM, RHOH, SELL, TNC	9			Cell-To-Cell Signaling and Interaction	binding	binding of antigen presenting cells	1.94e-06	CCR1, FGF2, FPR1, IL8, IL1A, PTPRC, SELE	7
	Nervous System Development and Function	activation	activation of neuroglia	0.000534	HGF, IL6, PLAT, PTGS2, VIM	5			Hematological Disease	binding	binding of leukemia cell lines	3.2e-07	CD14, FYB, IL6, IL8RA, IL8RB, ITGAM, RHOH, SELL, TNC	9			Immune and Lymphatic System Development and Function	binding	binding of antigen presenting cells	1.94e-06	CCR1, FGF2, FPR1, IL8, IL1A, PTPRC, SELE	7
	Cellular Growth and Proliferation	induction	induction of tumor cell lines	0.000569	HGF, IL6, INHBA	3			Cellular Growth and Proliferation	proliferation	proliferation of connective tissue cells	3.24e-07	EREG, FGF2, HGF, IGFBP5, IL6, IL8, IL24, IL1A, IL1B, INHBA, OSM, PTGES, SOD2, SPP1, STC1, TNFRSF11B, WNT5A	17			Cell Death	cell death	cell death of myeloid cells	1.94e-06	BCL2A1, CD69, CSF3, IL6, IL8, IL1B, IL1RN, NAMPT	8
	Cancer	induction	induction of tumor cell lines	0.000569	HGF, IL6, INHBA	3			Cell Death	survival	survival of lymphatic system cells	3.46e-07	BCL6, CCL4, CSF3, CSF2RB, FGF2, HCK, ICAM1, IL6, IL8, NCF2, NFIL3, SERPINB2, TNFRSF1B, TNFSF13B	14			Hematological Disease	cell death	cell death of myeloid cells	1.94e-06	BCL2A1, CD69, CSF3, IL6, IL8, IL1B, IL1RN, NAMPT	8
	Cell-To-Cell Signaling and Interaction	induction	induction of tumor cell lines	0.000569	HGF, IL6, INHBA	3			Cancer	developmental process	developmental process of tumor cell lines	3.66e-07	BCL6, CD14, CDX2, CSF3, CSF2RB, DUSP1, EGR1, EREG, FCER1G, FGF2, FST, HGF, HOXB13, IGFBP5, IL6, IL8, IL11, IL24, IL1B, IL1RN, INHBA, ITGAM, OSM, PTGS2, SERPINB2, SERPINE1, SOCS3, SOD2, SPP1, THBS2, TLR4, TNFRSF1B, WNT5A	33			Cardiovascular System Development and Function	vascularization	vascularization	2e-06	C5AR1, CSF3, CYR61, FGF2, HGF, IL1B, INHBA, PTGS2, STC1, THBS2	10
	Cardiovascular Disease	pulmonary embolism	pulmonary embolism	0.000569	PLAT, PTGS1, PTGS2	3			Viral Function	replication	replication of HIV	3.79e-07	CCL4, HCK, IL6, IL8, IL1B, PTPRC, S100A8, S100A9, S100A12	9			Organismal Development	vascularization	vascularization	2e-06	C5AR1, CSF3, CYR61, FGF2, HGF, IL1B, INHBA, PTGS2, STC1, THBS2	10
[truncated: 223 more rows]
